# Supplementary material for: Chiral cyclopropenimine-catalyzed enantioselective Michael reactions of phenol and benzofuran-derived α,β-unsaturated pyrazolamides with benzophenone-imine of glycine esters
Source: publisher site journal article supplement (doi:10.3762/bjoc.22.69), 2026-06-08
Supplement: Additional file 1 [file 1860-5397-22-69-S1.pdf]

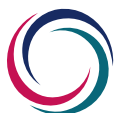

## Supporting Information

for

### **Chiral cyclopropenimine-catalyzed enantioselective Michael reactions of phenol and benzofuran-derived $\alpha,\beta$ -unsaturated pyrazolamides with benzophenone-imine of glycine esters**

Ya Bai, Xue-Ying Wang, Si-Kai Zhu, Yan-Ting Shen, Sheng-Yong Zhang and Ping-An Wang

*Beilstein J. Org. Chem.* **2026**, 22, 888–896. [doi:10.3762/bjoc.22.69](https://doi.org/10.3762/bjoc.22.69)

**Detailed experimental procedures, characterization data of all new compounds with NMR, HRMS, HPLC charts, and X-ray single crystal diffraction data**

## Table of Contents

|                                        |     |
|----------------------------------------|-----|
| <b>1. General</b> .....                | S3  |
| <b>2. Experimental sections</b> .....  | S3  |
| <b>3. X-ray diffraction data</b> ..... | S17 |
| <b>4. NMR scanning copies</b> .....    | S19 |
| <b>5. HRMS scanning copies</b> .....   | S69 |
| <b>6. HPLC charts</b> .....            | S85 |

## 1. General

The  $^1\text{H}$  NMR,  $^{13}\text{C}$  NMR,  $^{19}\text{F}$  NMR spectra were measured in acetone- $d_6$ ,  $\text{CDCl}_3$ , or  $\text{DMSO-}d_6$  solution on a Bruker AV-400 spectrometer using TMS as an internal reference. Coupling constant ( $J$ ) values are given in Hz. Multiplicities are designated by the following abbreviations: s, singlet; d, doublet; t, triplet; q, quartet; br, broad; m, multiplet. High-resolution mass spectrometry (HRMS) was performed on a Bruker microTOF-Q II Mass Spectrometer with ES ionization (ESI). All commercially available reagents were used as received. Thin-layer chromatography on silica (with GF254) was used to monitor all reactions. Products were purified by flash column chromatography on silica gel purchased from Qingdao Haiyang Chemical Co., Ltd. The configurations of the products have been assigned by single crystal X-ray diffraction analysis. All solvents, organic and inorganic reagents were from commercial sources and used without purification unless otherwise noted. Glycine esters,  $\beta$ -substituted  $\alpha,\beta$ -unsaturated pyrazolamides were prepared according to literatures reported methods.<sup>[1,2]</sup> Chiral cyclopropenimine organosuperbsaes (CSBs) **CSB-1-5** were prepared following literature reported procedure, and their characterization data are consistent with reference report.<sup>[3]</sup> The characterization data of all new compounds are listed in this document.

## 2. Experimental sections

### 2.1 The synthesis of substrates

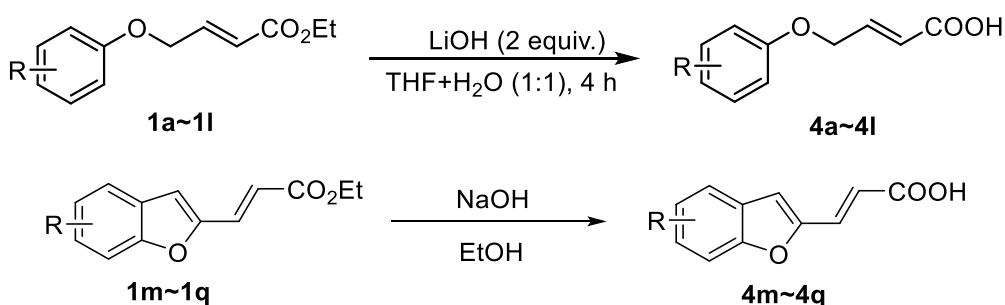

To  $\alpha,\beta$ -unsaturated ester **1** (1 equiv) in THF+H<sub>2</sub>O (1:1) added LiOH·H<sub>2</sub>O (2 equiv) at 0 °C and then the reaction mixture was stirred at room temperature for 4 h. After the substrate was detected by TLC plate, adjusted the pH to 3-4 with 2 *N* hydrochloric acid at 0 °C. The reaction was quenched by saturated saline, then extracted with DCM. The combined organic layers were dried over Na<sub>2</sub>SO<sub>4</sub> and the solvents were evaporated under vacuum to afford  $\alpha,\beta$ -unsaturated acid **4**.

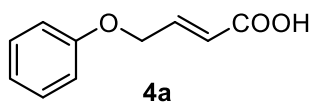

(*E*)-4-Phenoxybut-2-enoic acid (**4a**)<sup>[4]</sup>: white solid, quant. yield, m.p. 115.4-117.2 °C.  $^1\text{H}$  NMR (400 MHz,  $\text{DMSO-}d_6$ )  $\delta$  12.38 (s, 1H), 7.31 (dtd,  $J = 11.6, 8.0, 3.4$  Hz, 2H), 7.08 – 6.89 (m, 5H), 6.04 (d,  $J = 15.0$  Hz, 1H), 4.77 (d,  $J = 4.4$  Hz, 2H).

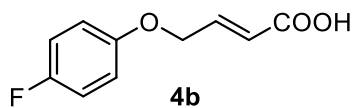

(*E*)-4-(4-Fluorophenoxy)but-2-enoic acid (**4b**): white solid, 97% yield.  $^1\text{H}$  NMR (400 MHz,  $\text{DMSO-}d_6$ )  $\delta$  12.43 (s, 1H), 7.19 – 7.09 (m, 2H), 7.04 – 6.90 (m, 3H), 6.04 (dt,  $J = 15.7, 2.0$  Hz, 1H), 4.76 (dd,  $J = 4.2, 2.1$  Hz, 2H).

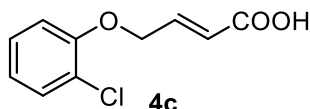

(*E*)-4-(2-Chlorophenoxy)but-2-enoic acid (**4c**): white solid, quant. yield, m.p. 171.9-173.0 °C.  $^1\text{H}$  NMR (400 MHz,  $\text{DMSO-}d_6$ )  $\delta$  12.51 (s, 1H), 7.49 – 7.42 (m, 1H), 7.34 – 7.28 (m, 1H), 7.15 (d,  $J = 8.3$  Hz, 1H), 7.03 – 6.92 (m, 2H), 6.16 – 6.04 (m, 1H), 4.95 – 4.80 (m, 2H).

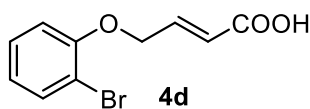

(*E*)-4-(2-Bromophenoxy)but-2-enoic acid (**4d**): white solid, 99% yield, m.p. 177.2-178.5 °C.  $^1\text{H}$  NMR (400 MHz,

DMSO-*d*<sub>6</sub>)  $\delta$  12.5 (s, 1H),  $\delta$  7.61 (dd,  $J = 7.9, 1.6$  Hz, 1H), 7.40 – 7.32 (m, 1H), 7.12 (dd,  $J = 8.3, 1.4$  Hz, 1H), 7.01 – 6.89 (m, 2H), 6.12 (dt,  $J = 15.7, 2.0$  Hz, 1H), 4.87 (dd,  $J = 4.0, 2.1$  Hz, 2H).

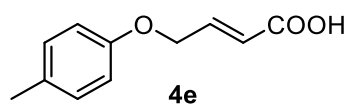

(*E*)-4-(*p*-Tolyloxy)but-2-enoic acid (**4e**): white solid, quant. yield, m.p. 158.3-159.2 °C. <sup>1</sup>H NMR (400 MHz, DMSO-*d*<sub>6</sub>)  $\delta$  7.09 (d,  $J = 8.3$  Hz, 2H), 6.93 (dt,  $J = 15.8, 4.1$  Hz, 1H), 6.88 – 6.81 (m, 2H), 6.01 (dt,  $J = 15.8, 2.1$  Hz, 1H), 4.72 (dd,  $J = 4.3, 2.0$  Hz, 2H), 2.22 (s, 3H).

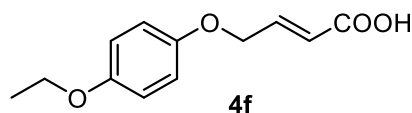

(*E*)-4-(4-Ethoxyphenoxy)but-2-enoic acid (**4f**): white solid, 97% yield, m.p. 147.1-147.6 °C. <sup>1</sup>H NMR (400 MHz, DMSO-*d*<sub>6</sub>)  $\delta$  7.00 – 6.81 (m, 5H), 6.03 (dt,  $J = 15.7, 2.0$  Hz, 1H), 4.70 (dd,  $J = 4.2, 2.1$  Hz, 2H), 3.94 (q,  $J = 6.9$  Hz, 2H), 1.29 (t,  $J = 7.0$  Hz, 3H).

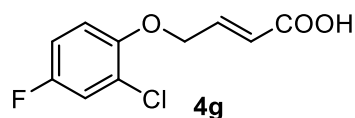

(*E*)-4-(2-Chloro-4-fluorophenoxy)but-2-enoic acid (**4g**): white solid, quant. yield, m.p. 124.2-125.6 °C. <sup>1</sup>H NMR (400 MHz, DMSO-*d*<sub>6</sub>)  $\delta$  7.46 (dd,  $J = 8.3, 2.5$  Hz, 1H), 7.22 – 7.15 (m, 2H), 6.95 (dt,  $J = 15.8, 4.0$  Hz, 1H), 6.08 (dt,  $J = 15.7, 2.1$  Hz, 1H), 4.86 (dd,  $J = 4.1, 2.1$  Hz, 2H).

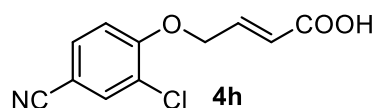

(*E*)-4-(2-Chloro-4-cyanophenoxy)but-2-enoic acid (**4h**): white solid, 94% yield, m.p. 142.4-143.2 °C. <sup>1</sup>H NMR (400 MHz, DMSO-*d*<sub>6</sub>)  $\delta$  8.05 (d,  $J = 2.0$  Hz, 1H), 7.87 – 7.84 (m, 1H), 7.32 (d,  $J = 8.7$  Hz, 1H), 6.93 – 6.90 (m, 1H), 6.08 (dt,  $J = 15.7, 2.0$  Hz, 1H), 5.00 (dd,  $J = 4.1, 2.1$  Hz, 2H).

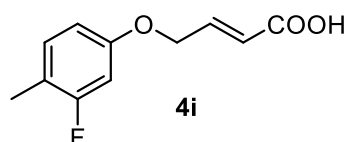

(*E*)-4-(3-Fluoro-4-methylphenoxy)but-2-enoic acid (**4i**): white solid, 97% yield, m.p. 165.7-166.6 °C. <sup>1</sup>H NMR (400 MHz, DMSO-*d*<sub>6</sub>)  $\delta$  12.44 (s, 1H), 7.17 (t,  $J = 8.8$  Hz, 1H), 6.91 (dt,  $J = 15.7, 4.2$  Hz, 1H), 6.81 (dd,  $J = 11.8, 2.6$  Hz, 1H), 6.72 (dd,  $J = 8.4, 2.6$  Hz, 1H), 6.01 (dt,  $J = 15.7, 2.0$  Hz, 1H), 4.75 (dd,  $J = 4.3, 2.0$  Hz, 2H), 2.14 (d,  $J = 1.8$  Hz, 3H).

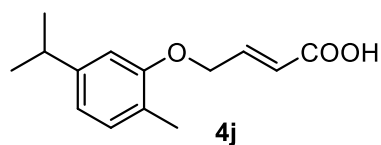

(*E*)-4-(5-Isopropyl-2-methylphenoxy)but-2-enoic acid (**4j**): white solid, 95%. <sup>1</sup>H NMR (400 MHz, Chloroform-*d*)  $\delta$  7.00 (dd,  $J = 7.5, 0.9$  Hz, 1H), 6.71 (dd,  $J = 7.6, 1.7$  Hz, 1H), 6.63 (d,  $J = 1.7$  Hz, 1H), 5.94 (d,  $J = 1.1$  Hz, 1H), 5.75 (s, 1H), 4.39 – 4.24 (m, 2H), 2.89 – 2.75 (m, 1H), 2.38 (s, 3H), 1.21 (d,  $J = 7.0$  Hz, 6H).

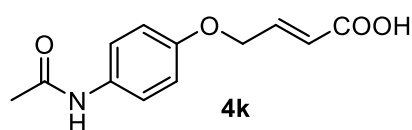

(*E*)-4-(4-Acetamidophenoxy)but-2-enoic acid (**4k**): white solid, 87% yield, m.p. 210.3-211.4 °C. <sup>1</sup>H NMR (400 MHz, DMSO-*d*<sub>6</sub>)  $\delta$  12.43 (s, 1H), 9.84 (s, 1H), 7.49 (d,  $J = 9.0$  Hz, 2H), 7.01 – 6.82 (m, 3H), 6.03 (dt,  $J = 15.8, 2.0$  Hz, 1H), 4.73 (dd,  $J = 4.3, 2.0$  Hz, 2H), 2.01 (s, 3H).

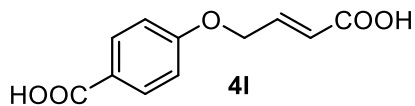

(*E*)-4-((3-Carboxyallyl)oxy)benzoic acid (**4l**): white solid, quant. yield, m.p. 328.3-330.2 °C. <sup>1</sup>H NMR (400 MHz, DMSO-*d*<sub>6</sub>) δ 7.90 (d, *J* = 8.7 Hz, 2H), 7.06 (d, *J* = 8.9 Hz, 2H), 6.95 (dt, *J* = 15.7, 4.3 Hz, 1H), 6.11 – 5.97 (m, 1H), 4.87 (dd, *J* = 4.3, 2.0 Hz, 2H);

To intermediate **1m** (1 equiv) in EtOH added dropwise of sodium hydroxide solution (2 N, 3 equiv) at room temperature. The reaction mixture was stirred at room temperature for 2 h. After the substrate was detected by TLC plate, it was concentrated under reduced pressure. Then added a little water and adjusted the pH to 3-4 with 2 N HCl at 0 °C. Filter and remove solids and place in oven. These solids are intermediate **4m**.

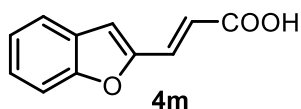

(*E*)-3-(Benzofuran-2-yl)acrylic acid (**4m**)<sup>[5]</sup>: white solid, 98% yield, <sup>1</sup>H NMR (400 MHz, DMSO-*d*<sub>6</sub>) δ 7.70 (d, *J* = 7.0 Hz, 1H), 7.59 (dd, *J* = 19.4, 12.0 Hz, 2H), 7.48 – 7.37 (m, 1H), 7.37 – 7.23 (m, 2H), 6.44 (d, *J* = 15.7 Hz, 1H).

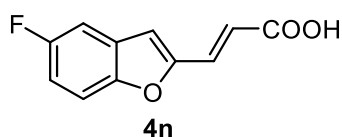

(*E*)-3-(5-Fluorobenzofuran-2-yl)acrylic acid (**4n**): white solid, 74% yield, <sup>1</sup>H NMR (400 MHz, DMSO-*d*<sub>6</sub>) δ 12.68 (s, 1H), 7.75 – 7.62 (m, 1H), 7.62 – 7.48 (m, 2H), 7.35 (s, 1H), 7.25 (t, *J* = 7.8 Hz, 1H), 6.44 (d, *J* = 15.8 Hz, 1H).

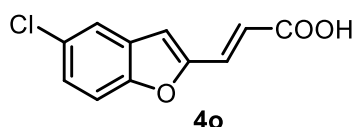

(*E*)-3-(5-Chlorobenzofuran-2-yl)acrylic acid (**4o**): white solid, 97% yield, <sup>1</sup>H NMR (400 MHz, DMSO-*d*<sub>6</sub>) δ 7.80 (d, *J* = 2.0 Hz, 1H), 7.72 – 7.55 (m, 2H), 7.43 (dd, *J* = 8.8, 2.2 Hz, 1H), 7.34 (s, 1H), 6.45 (d, *J* = 15.8 Hz, 1H).

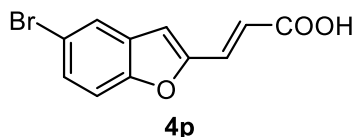

(*E*)-3-(5-Bromobenzofuran-2-yl)acrylic acid (**4p**): white solid, 77% yield, <sup>1</sup>H NMR (400 MHz, DMSO-*d*<sub>6</sub>) δ 12.71 (s, 1H), 7.94 (s, 1H), 7.69 – 7.47 (m, 3H), 7.33 (s, 1H), 6.45 (d, *J* = 15.8 Hz, 1H).

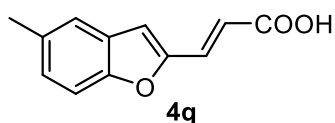

(*E*)-3-(5-Methylbenzofuran-2-yl)acrylic acid (**4q**): white solid, quant. yield, <sup>1</sup>H NMR (400 MHz, DMSO-*d*<sub>6</sub>) δ 12.60 (s, 1H), 7.65 – 7.42 (m, 3H), 7.35 – 7.16 (m, 2H), 6.40 (d, *J* = 15.7 Hz, 1H), 2.40 (s, 3H).

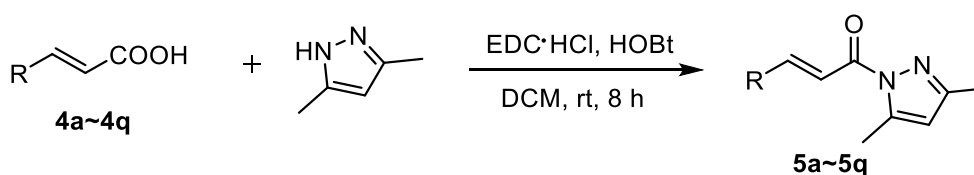

To **4** (5.6 mol), EDC·HCl (6.7 mol, 1.2 equiv) and HOBT (5.6 mol, 1 equiv) in dry DCM (35.0 mL) added 3,5-dimethylpyrazole (11.2 mol, 2 equiv) and the mixture was stirred at rt for 8 h. After the reaction completed (detected by TLC), and it was quenched by H<sub>2</sub>O (15 mL), NaHCO<sub>3</sub> (5%) and saturated saline, then extracted with DCM. The combined

organic layers were dried over Na<sub>2</sub>SO<sub>4</sub> and the solvents were evaporated under vacuum. The residue was purified by a flash column chromatography to afford pure substrates **5** as white solid.

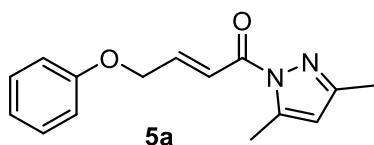

(*E*)-1-(3,5-Dimethyl-1*H*-pyrazol-1-yl)-4-phenoxybut-2-en-1-one (**5a**): white solid, 51% yield, m.p. 82.9-83.6 °C. <sup>1</sup>H NMR (400 MHz, Chloroform-*d*) δ 7.65 (d, *J* = 15.8 Hz, 1H), 7.36 – 7.26 (m, 3H), 7.02 – 6.91 (m, 3H), 5.99 (s, 1H), 4.80 (s, 2H), 2.58 (s, 3H), 2.25 (s, 3H); <sup>13</sup>C NMR (101 MHz, Chloroform-*d*) δ 164.7, 158.3, 152.1, 144.4, 144.2, 129.5, 122.1, 121.3, 114.9, 111.6, 67.1, 14.5, 13.8. HRMS-ESI (*m/z*): [M+Na]<sup>+</sup> calcd. for C<sub>15</sub>H<sub>16</sub>N<sub>2</sub>O<sub>2</sub>Na<sup>+</sup>: 279.1109, found: 279.1110.

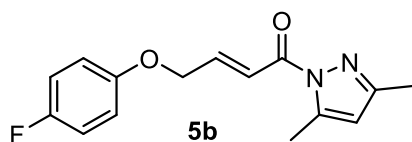

(*E*)-1-(3,5-Dimethyl-1*H*-pyrazol-1-yl)-4-(4-fluorophenoxy)but-2-en-1-one (**5b**): white solid, 48% yield, m.p. 104.5-105.7 °C. <sup>1</sup>H NMR (400 MHz, Chloroform-*d*) δ 7.60 (dt, *J* = 15.8, 2.0 Hz, 1H), 7.26 – 7.19 (m, 1H), 6.98 – 6.91 (m, 2H), 6.89 – 6.82 (m, 2H), 5.96 (s, 1H), 4.72 (dd, *J* = 4.4, 2.0 Hz, 2H), 2.55 (d, *J* = 1.0 Hz, 3H), 2.22 (s, 3H); <sup>13</sup>C NMR (101 MHz, Chloroform-*d*) δ 164.6, 157.6 (d, *J* = 239.1 Hz), 154.3 (d, *J* = 2.2 Hz), 152.2, 144.5, 143.9, 122.2, 115.9 (d, *J* = 8.0 Hz), 115.9 (d, *J* = 23.0 Hz), 111.6, 67.8, 14.6, 13.8; <sup>19</sup>F NMR (376 MHz, Chloroform-*d*) δ -123.2. HRMS-ESI (*m/z*): [M+H]<sup>+</sup> calcd. for C<sub>15</sub>H<sub>15</sub>FN<sub>2</sub>O<sub>2</sub>H<sup>+</sup>: 275.1190, found: 275.1188.

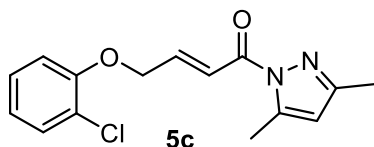

(*E*)-4-(2-Chlorophenoxy)-1-(3,5-dimethyl-1*H*-pyrazol-1-yl)but-2-en-1-one (**5c**): white solid, 41% yield, m.p. 85.1-86.3°C. <sup>1</sup>H NMR (400 MHz, Chloroform-*d*) δ 7.65 (dt, *J* = 15.8, 1.9 Hz, 1H), 7.32 (dd, *J* = 8.1, 1.6 Hz, 1H), 7.26 – 7.18 (m, 1H), 7.16 – 7.10 (m, 1H), 6.90 – 6.79 (m, 2H), 5.92 (s, 1H), 4.80 (dd, *J* = 4.4, 2.0 Hz, 2H), 2.51 (d, *J* = 1.0 Hz, 3H), 2.18 (s, 3H); <sup>13</sup>C NMR (101 MHz, Chloroform-*d*) δ 164.6, 153.8, 152.2, 144.4, 143.3, 130.5, 127.7, 123.4, 122.7, 122.1, 114.0, 111.6, 68.3, 14.6, 13.9. HRMS-ESI (*m/z*): [M+H]<sup>+</sup> calcd. for C<sub>15</sub>H<sub>15</sub>ClN<sub>2</sub>O<sub>2</sub>H<sup>+</sup>: 291.0895, found: 291.0890.

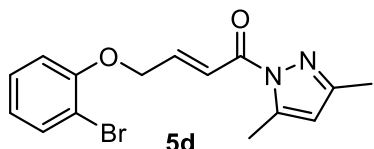

(*E*)-4-(2-Bromophenoxy)-1-(3,5-dimethyl-1*H*-pyrazol-1-yl)but-2-en-1-one (**5d**): white solid, 57% yield, m.p. 75.8-76.9°C. <sup>1</sup>H NMR (400 MHz, Chloroform-*d*) δ 7.68 (dt, *J* = 15.8, 2.0 Hz, 1H), 7.49 (dd, *J* = 7.8, 1.6 Hz, 1H), 7.28 – 7.14 (m, 2H), 6.87 – 6.75 (m, 2H), 5.92 (s, 1H), 4.79 (dd, *J* = 4.4, 2.0 Hz, 2H), 2.51 (d, *J* = 1.0 Hz, 3H), 2.18 (s, 3H); <sup>13</sup>C NMR (101 MHz, Chloroform-*d*) δ 164.6, 154.7, 152.2, 144.4, 143.2, 133.6, 128.5, 122.7, 122.6, 113.8, 112.6, 111.6, 68.3, 14.6, 13.9. HRMS-ESI (*m/z*): [M+H]<sup>+</sup> calcd. for C<sub>15</sub>H<sub>15</sub>BrN<sub>2</sub>O<sub>2</sub>H<sup>+</sup>: 335.0390, found: 335.0385.

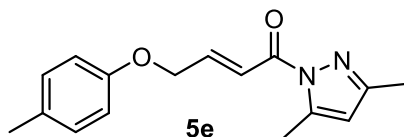

(*E*)-1-(3,5-Dimethyl-1*H*-pyrazol-1-yl)-4-(*p*-tolylloxy)but-2-en-1-one (**5e**): white solid, 23% yield, m.p. 65.1-66.4 °C. <sup>1</sup>H NMR (400 MHz, Chloroform-*d*) δ 7.57 (dt, *J* = 15.8, 2.0 Hz, 1H), 7.24 – 7.16 (m, 1H), 7.07 – 6.97 (m, 2H), 6.83 – 6.74 (m, 2H), 5.92 (s, 1H), 4.70 (dd, *J* = 4.4, 2.0 Hz, 2H), 2.51 (s, 3H), 2.22 (s, 3H), 2.19 (s, 3H); <sup>13</sup>C NMR (101 MHz, Chloroform-*d*) δ 164.7, 156.1, 152.1, 144.5, 144.4, 130.6, 130.0, 121.9, 114.7, 111.6, 67.3, 20.5, 14.6, 13.8. HRMS-ESI (*m/z*): [M+H]<sup>+</sup> calcd. for C<sub>16</sub>H<sub>18</sub>N<sub>2</sub>O<sub>2</sub>H<sup>+</sup>: 271.1441, found: 271.1440.

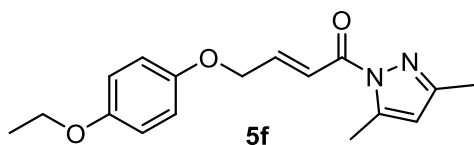

(*E*)-1-(3,5-Dimethyl-1*H*-pyrazol-1-yl)-4-(4-ethoxyphenoxy)but-2-en-1-one (**5f**): white solid, 59% yield, m.p. 77.4-78.5 °C. <sup>1</sup>H NMR (400 MHz, Chloroform-*d*) δ 7.66 (dt, *J* = 15.8, 2.0 Hz, 1H), 7.31 (dt, *J* = 15.8, 4.3 Hz, 1H), 6.96 – 6.82 (m, 4H), 6.01 (s, 1H), 4.77 (dd, *J* = 4.4, 2.0 Hz, 2H), 4.00 (q, *J* = 7.0 Hz, 2H), 2.61 (d, *J* = 1.0 Hz, 3H), 2.28 (s, 3H), 1.41 (t, *J* = 7.0 Hz, 3H); <sup>13</sup>C NMR (101 MHz, Acetone-*d*<sub>6</sub>) δ 165.1, 154.6, 153.3, 152.5, 145.9, 144.8, 122.0, 116.7, 116.2, 112.3, 68.5, 64.4, 15.2, 14.5, 13.8. HRMS-ESI (*m/z*): [*M*+*H*]<sup>+</sup> calcd. for C<sub>17</sub>H<sub>20</sub>N<sub>2</sub>O<sub>3</sub>H<sup>+</sup>: 301.1547, found: 301.1543.

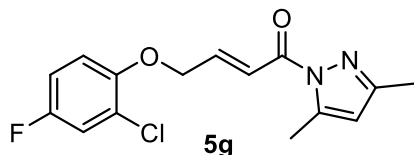

(*E*)-4-(2-Chloro-4-fluorophenoxy)-1-(3,5-dimethyl-1*H*-pyrazol-1-yl)but-2-en-1-one (**5g**): white solid, 40% yield, m.p. 91.6-92.4°C. <sup>1</sup>H NMR (400 MHz, Chloroform-*d*) δ 7.63 (dt, *J* = 15.8, 1.9 Hz, 1H), 7.25 – 7.15 (m, 1H), 7.08 (dd, *J* = 8.0, 2.8 Hz, 1H), 6.90 – 6.77 (m, 2H), 5.93 (s, 1H), 4.76 (dd, *J* = 4.5, 2.0 Hz, 2H), 2.51 (d, *J* = 1.0 Hz, 3H), 2.18 (s, 3H); <sup>13</sup>C NMR (101 MHz, Chloroform-*d*) δ 164.5, 157.0 (d, *J* = 242.9 Hz), 152.3, 150.4 (d, *J* = 2.9 Hz), 144.4, 143.0, 124.3 (d, *J* = 10.7 Hz), 122.7, 117.8 (d, *J* = 25.8 Hz), 115.1 (d, *J* = 8.8 Hz), 114.1 (d, *J* = 22.6 Hz), 111.6, 69.1, 14.5, 13.8; <sup>19</sup>F NMR (376 MHz, Chloroform-*d*) δ -120.5. HRMS-ESI (*m/z*): [*M*+*H*]<sup>+</sup> calcd. for C<sub>15</sub>H<sub>14</sub>ClFN<sub>2</sub>O<sub>2</sub>H<sup>+</sup>: 309.0801, found: 309.0798.

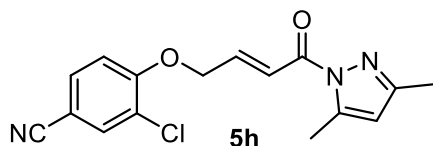

(*E*)-3-Chloro-4-((4-(3,5-dimethyl-1*H*-pyrazol-1-yl)-4-oxobut-2-en-1-yl)oxy)benzotrile (**5h**): white solid, 24% yield, m.p. 145.2-146.9°C. <sup>1</sup>H NMR (400 MHz, Acetone-*d*<sub>6</sub>) δ 7.90 (s, 1H), 7.80 – 7.67 (m, 2H), 7.39 (d, *J* = 8.6 Hz, 1H), 7.29 (dt, *J* = 15.9, 4.3 Hz, 1H), 6.15 (s, 1H), 5.23 – 5.10 (m, 2H), 2.55 (s, 3H), 2.20 (s, 3H); <sup>13</sup>C NMR (101 MHz, Acetone-*d*<sub>6</sub>) δ 164.9, 158.2, 152.7, 144.9, 143.3, 134.5, 133.8, 124.2, 123.1, 118.3, 115.3, 112.4, 106.2, 69.2, 14.5, 13.8. HRMS-ESI (*m/z*): [*M*+*H*]<sup>+</sup> calcd. for C<sub>16</sub>H<sub>14</sub>ClN<sub>3</sub>O<sub>2</sub>H<sup>+</sup>: 316.0847, found: 316.0845.

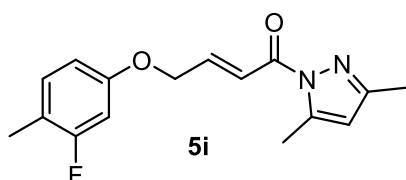

(*E*)-1-(3,5-Dimethyl-1*H*-pyrazol-1-yl)-4-(3-fluoro-4-methylphenoxy)but-2-en-1-one (**5i**): white solid, 38% yield, m.p. 91.7-93.3 °C. <sup>1</sup>H NMR (400 MHz, Chloroform-*d*) δ 7.56 (dt, *J* = 15.8, 2.0 Hz, 1H), 7.24 – 7.12 (m, 1H), 7.05 – 6.90 (m, 1H), 6.62 – 6.49 (m, 2H), 5.92 (s, 1H), 4.68 (dd, *J* = 4.4, 2.0 Hz, 2H), 2.51 (d, *J* = 1.0 Hz, 3H), 2.18 (s, 3H), 2.12 (d, *J* = 1.8 Hz, 3H); <sup>13</sup>C NMR (101 MHz, Chloroform-*d*) δ 164.6, 161.6 (d, *J* = 244.9 Hz), 157.4 (d, *J* = 10.4 Hz), 152.2, 144.5, 143.7, 131.5 (d, *J* = 7.2 Hz), 122.2, 117.3 (d, *J* = 17.6 Hz), 111.6, 110.2 (d, *J* = 3.1 Hz), 102.5 (d, *J* = 25.8 Hz), 67.4, 14.6, 13.8, 13.8 (d, *J* = 3.1 Hz); <sup>19</sup>F NMR (376 MHz, Chloroform-*d*) δ -115.0. HRMS-ESI (*m/z*): [*M*+*H*]<sup>+</sup> calcd. for C<sub>16</sub>H<sub>17</sub>FN<sub>2</sub>O<sub>2</sub>H<sup>+</sup>: 289.1347, found: 289.1348.

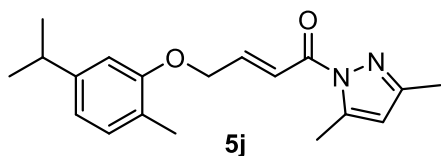

(*E*)-1-(3,5-Dimethyl-1*H*-pyrazol-1-yl)-4-(5-isopropyl-2-methylphenoxy)but-2-en-1-one (**5j**): white solid, 38% yield, m.p. 50.9-52.0 °C. <sup>1</sup>H NMR (400 MHz, Chloroform-*d*) δ 7.70 (dt, *J* = 15.8, 2.0 Hz, 1H), 7.32 (dt, *J* = 15.7, 4.4 Hz, 1H), 7.09 (dd, *J* = 7.6, 0.8 Hz, 1H), 6.77 (dd, *J* = 7.5, 1.6 Hz, 1H), 6.69 (d, *J* = 1.6 Hz, 1H), 6.00 (s, 1H), 4.81 (dd, *J* = 4.5, 2.0 Hz, 2H),

2.59 (d,  $J = 1.0$  Hz, 3H), 2.26 (d,  $J = 5.2$  Hz, 6H), 1.24 (d,  $J = 6.9$  Hz, 6H);  $^{13}\text{C}$  NMR (101 MHz, Acetone- $d_6$ )  $\delta$  165.2, 157.3, 152.5, 148.8, 145.7, 144.8, 131.4, 124.7, 122.1, 119.5, 112.2, 111.0, 68.0, 34.8, 24.4, 16.0, 14.5, 13.8. HRMS-ESI ( $m/z$ ):  $[\text{M}+\text{H}]^+$  calcd. for  $\text{C}_{19}\text{H}_{24}\text{FN}_2\text{O}_2\text{H}^+$ : 313.1911, found: 313.1902.

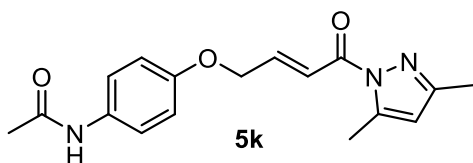

(*E*)-*N*-(4-((4-(3,5-Dimethyl-1*H*-pyrazol-1-yl)-4-oxobut-2-en-1-yl)oxy) phenyl)acetamide (**5k**): white solid, 24% yield, m.p. 143.5-144.2°C.  $^1\text{H}$  NMR (400 MHz, Chloroform- $d$ )  $\delta$  7.56 (dt,  $J = 15.7, 2.0$  Hz, 1H), 7.38 – 7.30 (m, 2H), 7.25 – 7.16 (m, 2H), 7.11 (s, 1H), 6.88 – 6.80 (m, 2H), 5.93 (s, 1H), 4.70 (dd,  $J = 4.3, 2.0$  Hz, 2H), 2.51 (d,  $J = 1.0$  Hz, 3H), 2.19 (s, 3H), 2.08 (s, 3H);  $^{13}\text{C}$  NMR (101 MHz, Chloroform- $d$ )  $\delta$  168.1, 164.6, 155.0, 152.2, 144.5, 144.1, 131.6, 122.1, 121.8, 115.2, 111.6, 67.4, 24.4, 14.6, 13.8. HRMS-ESI ( $m/z$ ):  $[\text{M}+\text{H}]^+$  calcd. for  $\text{C}_{17}\text{H}_{19}\text{N}_3\text{O}_3\text{H}^+$ : 314.1499, found: 314.1497.

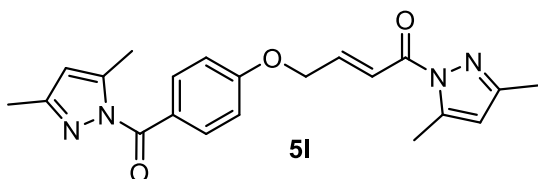

(*E*)-1-(3,5-Dimethyl-1*H*-pyrazol-1-yl)-4-(4-(3,5-dimethyl-1*H*-pyrazole-1-carbonyl)phenoxy)but-2-en-1-one (**5l**): white solid, 38% yield, m.p. 131.3-132.2°C.  $^1\text{H}$  NMR (400 MHz, Chloroform- $d$ )  $\delta$  8.06 – 7.89 (m, 2H), 7.58 (dt,  $J = 15.8, 2.0$  Hz, 1H), 7.25 – 7.17 (m, 1H), 6.94 (d,  $J = 8.9$  Hz, 2H), 5.95 (dd,  $J = 16.7, 1.1$  Hz, 2H), 4.80 (dd,  $J = 4.3, 2.0$  Hz, 2H), 2.52 (d,  $J = 8.6$  Hz, 6H), 2.19 (d,  $J = 2.5$  Hz, 6H);  $^{13}\text{C}$  NMR (101 MHz, Acetone- $d_6$ )  $\delta$  167.8, 165.0, 162.6, 152.7, 152.1, 145.6, 144.9, 144.7, 134.8, 127.1, 122.5, 114.7, 112.3, 111.4, 68.1, 14.5, 14.2, 13.8, 13.7. HRMS-ESI ( $m/z$ ):  $[\text{M}+\text{H}]^+$  calcd. for  $\text{C}_{21}\text{H}_{22}\text{N}_4\text{O}_3\text{H}^+$ : 379.1765, found: 379.1759.

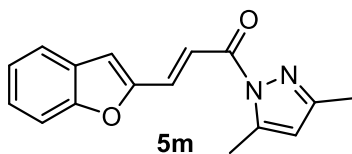

(*E*)-3-(Benzofuran-2-yl)-1-(3,5-dimethyl-1*H*-pyrazol-1-yl)prop-2-en-1-one (**5m**): white solid, 71% yield, m.p. 152.3-153.1°C.  $^1\text{H}$  NMR (400 MHz, Chloroform- $d$ )  $\delta$  8.03 (d,  $J = 15.6$  Hz, 1H), 7.75 (d,  $J = 15.6$  Hz, 1H), 7.60 (d,  $J = 7.5$  Hz, 1H), 7.52 (d,  $J = 8.1$  Hz, 1H), 7.37 (t,  $J = 7.4$  Hz, 1H), 7.24 (d,  $J = 7.1$  Hz, 1H), 7.03 (s, 1H), 6.02 (s, 1H), 2.62 (s, 3H), 2.31 (s, 3H);  $^{13}\text{C}$  NMR (101 MHz, Chloroform- $d$ )  $\delta$  165.1, 155.8, 153.0, 152.1, 144.4, 132.2, 128.5, 126.7, 123.3, 121.8, 118.7, 112.0, 111.6, 14.6, 13.9. HRMS-ESI ( $m/z$ ):  $[\text{M}+\text{Na}]^+$  calcd. for  $\text{C}_{16}\text{H}_{14}\text{N}_2\text{O}_2\text{Na}^+$ : 289.0953, found: 289.0954.

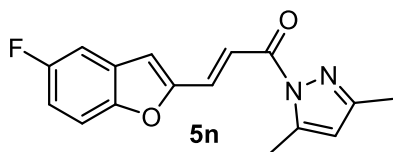

(*E*)-1-(3,5-Dimethyl-1*H*-pyrazol-1-yl)-3-(5-fluorobenzofuran-2-yl)prop-2-en-1-one (**5n**): white solid, 69% yield, m.p. 158.3-159.1°C.  $^1\text{H}$  NMR (400 MHz, Chloroform- $d$ )  $\delta$  8.03 (d,  $J = 15.6$  Hz, 1H), 7.72 (d,  $J = 15.7$  Hz, 1H), 7.52 – 7.40 (m, 1H), 7.24 (s, 1H), 7.10 (t,  $J = 7.7$  Hz, 1H), 7.00 (s, 1H), 6.03 (s, 1H), 2.63 (s, 3H), 2.31 (s, 3H);  $^{13}\text{C}$  NMR (101 MHz, Chloroform- $d$ )  $\delta$  164.9, 159.4 (d,  $J = 238.9$  Hz), 154.6, 144.4, 131.8, 129.2, 129.1, 119.5, 114.5 (d,  $J = 26.6$  Hz), 112.3 (d,  $J = 9.4$  Hz), 111.7, 111.6, 107.2, 106.9, 14.6, 13.9;  $^{19}\text{F}$  NMR (376 MHz, Chloroform- $d$ )  $\delta$  -120.0. HRMS-ESI ( $m/z$ ):  $[\text{M}+\text{Na}]^+$  calcd. for  $\text{C}_{16}\text{H}_{13}\text{N}_2\text{O}_2\text{FNa}^+$ : 307.0859, found: 307.0859.

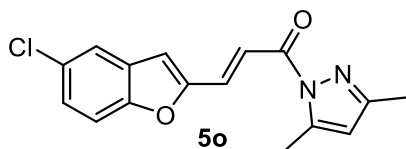

(*E*)-3-(5-Chlorobenzofuran-2-yl)-1-(3,5-dimethyl-1*H*-pyrazol-1-yl)prop-2-en-1-one (**5o**): white solid, 59% yield, m.p. 171.3-172.9°C. <sup>1</sup>H NMR (400 MHz, Chloroform-*d*) δ 8.04 (d, *J* = 15.7 Hz, 1H), 7.71 (d, *J* = 15.7 Hz, 1H), 7.57 (d, *J* = 1.7 Hz, 1H), 7.45 (d, *J* = 8.7 Hz, 1H), 7.33 (dd, *J* = 8.8, 1.8 Hz, 1H), 6.03 (s, 1H), 2.63 (s, 3H), 2.31 (s, 3H); <sup>13</sup>C NMR (101 MHz, Acetone-*d*<sub>6</sub>) δ 165.1, 155.3, 155.0, 152.8, 144.9, 132.2, 131.0, 129.5, 127.7, 122.4, 120.4, 113.7, 112.7, 112.5, 14.5, 13.8. HRMS-ESI (*m/z*): [M+Na]<sup>+</sup> calcd. for C<sub>16</sub>H<sub>13</sub>N<sub>2</sub>O<sub>2</sub>ClNa<sup>+</sup>: 323.0563, found: 323.0562.

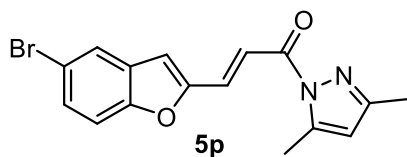

(*E*)-3-(5-Bromobenzofuran-2-yl)-1-(3,5-dimethyl-1*H*-pyrazol-1-yl)prop-2-en-1-one (**5p**): white solid, 82% yield, m.p. 181.2-182.1°C. <sup>1</sup>H NMR (400 MHz, Chloroform-*d*) δ 8.04 (d, *J* = 15.7 Hz, 1H), 7.71 (d, *J* = 15.2 Hz, 2H), 7.54 – 7.35 (m, 2H), 6.96 (s, 1H), 6.03 (s, 1H), 2.62 (s, 3H), 2.31 (s, 3H); <sup>13</sup>C NMR (101 MHz, Chloroform-*d*) δ 164.9, 154.4, 154.1, 152.3, 144.4, 131.6, 130.4, 129.5, 124.3, 119.8, 116.4, 113.0, 111.7, 110.8, 14.6, 13.9. HRMS-ESI (*m/z*): [M+Na]<sup>+</sup> calcd. for C<sub>16</sub>H<sub>13</sub>N<sub>2</sub>O<sub>2</sub>BrNa<sup>+</sup>: 367.0058, found: 367.0052.

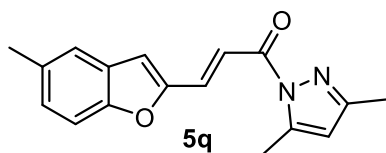

(*E*)-1-(3,5-Dimethyl-1*H*-pyrazol-1-yl)-3-(5-methylbenzofuran-2-yl)prop-2-en-1-one (**5q**): white solid, 63% yield, m.p. 125.5-126.2°C. <sup>1</sup>H NMR (400 MHz, Chloroform-*d*) δ 8.00 (d, *J* = 15.6 Hz, 1H), 7.73 (d, *J* = 15.6 Hz, 1H), 7.46 – 7.33 (m, 2H), 7.18 (d, *J* = 7.8 Hz, 1H), 6.96 (s, 1H), 6.02 (s, 1H), 2.62 (s, 3H), 2.44 (s, 3H), 2.31 (s, 3H); <sup>13</sup>C NMR (101 MHz, Chloroform-*d*) δ 165.2, 154.3, 153.1, 152.1, 144.3, 132.9, 132.4, 128.6, 128.1, 121.5, 118.3, 111.8, 111.5, 111.1, 21.3, 14.6, 13.9. HRMS-ESI (*m/z*): [M+Na]<sup>+</sup> calcd. for C<sub>17</sub>H<sub>16</sub>N<sub>2</sub>O<sub>2</sub>Na<sup>+</sup>: 303.1109, found: 303.1111.

## 2.2 General procedure for CSB-1 catalyzed Michael additions of **2** and **5**.

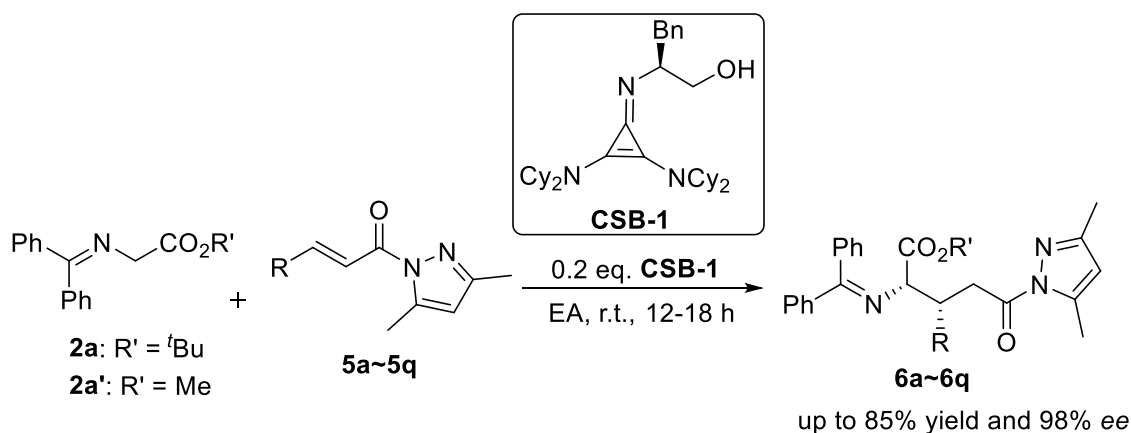

To **2** (1 mmol, 1 equiv) and **5** (1.0 mmol) in EA (10.0 mL) added **CSB-1** (0.2 mmol) and the mixture was stirred at rt for 12–18 h. After the reaction completed (detected by TLC), the solvent was removed by a rotary evaporator under reduced pressure. The residue was purified by a flash column chromatography (petroleum ether/EtOAc/Et<sub>3</sub>N 40:1:0.01~20:1:0.01, v/v) to afford pure **6** as a colorless sticky oil.

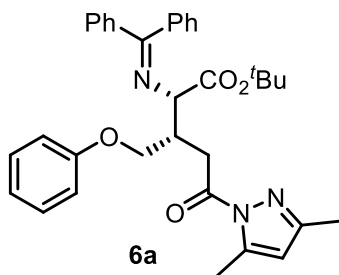

tert-Butyl (2*S*,3*S*)-5-(3,5-dimethyl-1*H*-pyrazol-1-yl)-2-((diphenylmethylene)amino)-5-oxo-3-(phenoxy)methyl)pentanoate

**(6a)**: colorless sticky oil, 85% yield, 98% *ee*,  $[\alpha]_D^{20} = +4.9$  ( $c = 0.10$ ,  $\text{CH}_2\text{Cl}_2$ ).  $^1\text{H NMR}$  (400 MHz, Acetone- $d_6$ )  $\delta$  7.61 (d,  $J = 7.1$  Hz, 2H), 7.52 – 7.30 (m, 6H), 7.24 (t,  $J = 8.0$  Hz, 2H), 7.18 – 7.11 (m, 2H), 6.94 – 6.81 (m, 3H), 6.03 (s, 1H), 4.39 (d,  $J = 4.1$  Hz, 1H), 4.13 (dd,  $J = 9.4, 5.1$  Hz, 1H), 3.99 (t,  $J = 8.8$  Hz, 1H), 3.64 (dd,  $J = 17.1, 4.6$  Hz, 1H), 3.50 – 3.30 (m, 2H), 2.49 (s, 3H), 2.17 (s, 3H), 1.41 (s, 9H);  $^{13}\text{C NMR}$  (101 MHz, Acetone- $d_6$ )  $\delta$  173.5, 172.3, 170.8, 159.7, 152.2, 144.5, 140.4, 137.4, 131.2, 130.2, 129.5, 129.4, 129.3, 128.8, 128.6, 121.5, 115.3, 111.7, 81.8, 68.6, 66.3, 39.3, 34.5, 28.2, 14.6, 13.8. HRMS-ESI ( $m/z$ ):  $[\text{M}+\text{H}]^+$  calcd. for  $\text{C}_{34}\text{H}_{38}\text{N}_3\text{O}_4^+$ : 552.2862, found: 552.2862. HPLC test condition: Chiralpak OD-H, Hexane/2-Propanol = 90:10, flow rate 0.8 mL/min, test wavelength 254 nm,  $t_R$  (major) = 5.286 min and 6.271 min,  $t_R$  (minor) = 6.873 min,  $dr > 20:1$ .

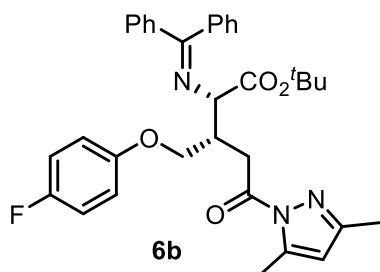

*tert*-Butyl (2*S*,3*S*)-5-(3,5-dimethyl-1*H*-pyrazol-1-yl)-2-((diphenylmethylene)amino)-3-((4-fluorophenoxy)methyl)-5-oxo-pentanoate (**6b**): colorless sticky oil, 68% yield, 98% *ee*,  $[\alpha]_D^{20} = -68.0$  ( $c = 0.10$ ,  $\text{CH}_2\text{Cl}_2$ ).  $^1\text{H NMR}$  (400 MHz, Acetone- $d_6$ )  $\delta$  7.63 – 7.56 (m, 2H), 7.52 – 7.45 (m, 3H), 7.45 – 7.39 (m, 1H), 7.39 – 7.31 (m, 2H), 7.19 – 7.10 (m, 2H), 7.05 – 6.97 (m, 2H), 6.88 – 6.81 (m, 2H), 6.03 (s, 1H), 4.36 (d,  $J = 4.2$  Hz, 1H), 4.11 (dd,  $J = 9.5, 5.2$  Hz, 1H), 4.00 – 3.94 (m, 1H), 3.63 (dd,  $J = 17.1, 4.7$  Hz, 1H), 3.43 (dd,  $J = 17.1, 8.0$  Hz, 1H), 3.38 – 3.29 (m, 1H), 2.49 (d,  $J = 1.0$  Hz, 3H), 2.17 (s, 3H), 1.41 (s, 9H);  $^{13}\text{C NMR}$  (101 MHz, Acetone- $d_6$ )  $\delta$  173.5, 172.3, 170.8, 158.0 (d,  $J = 236.2$  Hz), 155.9 (d,  $J = 1.4$  Hz), 152.2, 144.5, 140.4, 137.4, 131.3, 129.5, 129.3 (d,  $J = 8.8$  Hz), 128.7 (d,  $J = 25.5$  Hz), 116.5, 116.5, 116.4, 116.3, 111.8, 81.8, 69.3, 66.3, 39.3, 34.4, 28.2, 14.6, 13.8;  $^{19}\text{F NMR}$  (376 MHz, Acetone- $d_6$ )  $\delta$  51.8. HRMS-ESI ( $m/z$ ):  $[\text{M}+\text{H}]^+$  calcd. for  $\text{C}_{34}\text{H}_{37}\text{FN}_3\text{O}_4^+$ : 570.2763, found: 570.2755. HPLC test condition: Chiralpak OD-H, Hexane/2-Propanol = 90:10, flow rate 0.8 mL/min, test wavelength 254 nm,  $t_R$  (major) = 5.514 min and 6.625 min,  $t_R$  (minor) = 9.637 min,  $dr > 20:1$ .

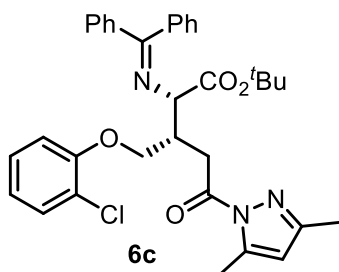

*tert*-Butyl (2*S*,3*S*)-3-((2-chlorophenoxy)methyl)-5-(3,5-dimethyl-1*H*-pyrazol-1-yl)-2-((diphenylmethylene)amino)-5-oxo-pentanoate (**6c**): colorless sticky oil, 50% yield, 98% *ee*,  $[\alpha]_D^{20} = -73.5$  ( $c = 0.11$ ,  $\text{CH}_2\text{Cl}_2$ ).  $^1\text{H NMR}$  (400 MHz, Acetone- $d_6$ )  $\delta$  7.64 – 7.56 (m, 2H), 7.49 – 7.39 (m, 4H), 7.38 – 7.29 (m, 3H), 7.27 – 7.16 (m, 3H), 7.15 – 7.09 (m, 1H), 6.95 – 6.86 (m, 1H), 6.00 (s, 1H), 4.52 – 4.47 (m, 1H), 4.23 – 4.13 (m, 2H), 3.70 – 3.59 (m, 1H), 3.49 – 3.36 (m, 2H), 2.48 (s, 3H), 2.16 (s, 3H), 1.39 (s, 9H);  $^{13}\text{C NMR}$  (101 MHz, Acetone- $d_6$ )  $\delta$  173.4, 172.4, 170.8, 155.2, 152.2, 144.5, 140.5, 137.2, 131.3, 130.8, 129.4, 129.4, 129.3, 128.9, 128.8, 128.6, 123.2, 122.3, 114.4, 111.7, 81.8, 69.8, 66.3, 39.4, 34.5, 28.2, 14.7, 13.8. HRMS-ESI ( $m/z$ ):  $[\text{M}+\text{H}]^+$  calcd. for  $\text{C}_{34}\text{H}_{37}\text{ClN}_3\text{O}_4^+$ : 586.2467, found: 586.2457. HPLC test condition: Chiralpak OD-H, Hexane/2-Propanol = 90:10, flow rate 0.8 mL/min, test wavelength 254 nm,  $t_R$  (minor) = 12.714 min,  $t_R$  (major) = 14.896 min,  $dr > 20:1$ .

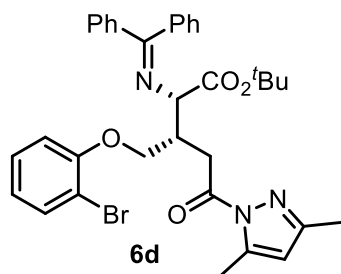

*tert*-Butyl (2*S*,3*S*)-3-((2-bromophenoxy)methyl)-5-(3,5-dimethyl-1*H*-pyrazol-1-yl)-2-((diphenylmethylene)amino)-5-oxopentanoate (**6d**): colorless sticky oil, 79% yield, 95% *ee*,  $[\alpha]_D^{20} = -80.0$  ( $c = 0.10$ ,  $\text{CH}_2\text{Cl}_2$ ).  $^1\text{H}$  NMR (400 MHz, Acetone- $d_6$ )  $\delta$  7.63 – 7.55 (m, 2H), 7.53 – 7.38 (m, 5H), 7.37 – 7.25 (m, 3H), 7.24 – 7.17 (m, 2H), 7.09 (dd,  $J = 8.3, 1.5$  Hz, 1H), 6.85 (td,  $J = 7.6, 1.4$  Hz, 1H), 5.99 (s, 1H), 4.53 (d,  $J = 4.8$  Hz, 1H), 4.19 (d,  $J = 5.4$  Hz, 2H), 3.71 – 3.60 (m, 1H), 3.47 – 3.37 (m, 2H), 2.48 (d,  $J = 1.1$  Hz, 3H), 2.16 (s, 3H), 1.38 (s, 9H);  $^{13}\text{C}$  NMR (101 MHz, Acetone- $d_6$ )  $\delta$  173.4, 172.4, 170.8, 156.0, 152.2, 144.5, 140.5, 137.3, 133.9, 131.3, 129.6, 129.4, 129.4, 128.8, 128.7, 122.8, 114.3, 112.6, 111.7, 81.8, 70.0, 66.4, 39.4, 34.6, 28.2, 14.7, 13.8. HRMS-ESI ( $m/z$ ):  $[\text{M}+\text{H}]^+$  calcd. for  $\text{C}_{34}\text{H}_{37}\text{BrN}_3\text{O}_4^+$ : 630.1962, found: 630.1954. HPLC test condition: Chiralpak OD-H, Hexane/2-Propanol = 90:10, flow rate 0.8 mL/min, test wavelength 254 nm,  $t_R$  (minor) = 5.199 min and 6.427 min,  $t_R$  (major) = 5.940 min and 6.726 min,  $dr > 20:1$ .

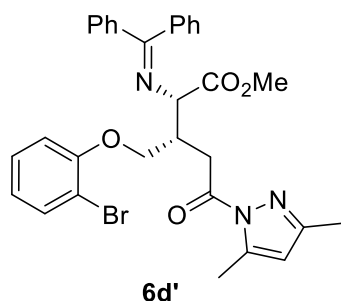

Methyl (2*S*,3*S*)-3-((2-bromophenoxy)methyl)-5-(3,5-dimethyl-1*H*-pyrazol-1-yl)-2-((diphenylmethylene)amino)-5-oxopentanoate (**6d'**): colorless sticky oil, 71% yield, 93% *ee*,  $[\alpha]_D^{20} = -78.2$  ( $c = 0.11$ ,  $\text{CH}_2\text{Cl}_2$ ).  $^1\text{H}$  NMR (400 MHz, Acetone- $d_6$ )  $\delta$  7.6 – 7.6 (m, 2H), 7.5 (dd,  $J = 7.9, 1.6$  Hz, 1H), 7.5 – 7.4 (m, 4H), 7.4 – 7.3 (m, 2H), 7.3 – 7.2 (m, 1H), 7.2 – 7.1 (m, 2H), 7.1 (dd,  $J = 8.3, 1.4$  Hz, 1H), 6.9 (td,  $J = 7.6, 1.4$  Hz, 1H), 6.0 (s, 1H), 4.6 (d,  $J = 4.4$  Hz, 1H), 4.2 (dd,  $J = 9.6, 4.3$  Hz, 1H), 4.1 (dd,  $J = 9.6, 7.0$  Hz, 1H), 3.7 – 3.7 (m, 1H), 3.6 (s, 3H), 3.5 – 3.4 (m, 2H), 2.5 (s, 3H), 2.2 (s, 3H);  $^{13}\text{C}$  NMR (101 MHz, Acetone- $d_6$ )  $\delta$  173.3, 172.8, 172.1, 155.9, 152.2, 144.5, 140.3, 137.0, 133.9, 131.4, 129.6, 129.5, 129.5, 128.8, 128.5, 122.7, 114.1, 112.5, 111.7, 69.6, 65.4, 52.4, 39.4, 34.4, 14.7, 13.8. HRMS-ESI ( $m/z$ ):  $[\text{M}+\text{H}]^+$  calcd. for  $\text{C}_{31}\text{H}_{31}\text{BrN}_3\text{O}_4^+$ : 588.1492, found: 588.1486. HPLC test condition: Chiralpak OD-H, Hexane/2-Propanol = 92:8, flow rate 0.8 mL/min, test wavelength 254 nm,  $t_R$  (minor) = 18.219 min,  $t_R$  (major) = 17.155 min,  $dr > 20:1$ .

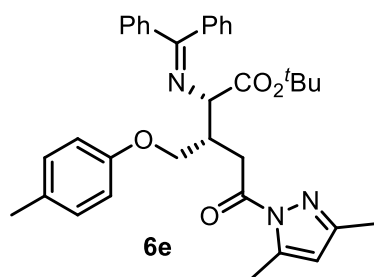

*tert*-Butyl (2*S*,3*S*)-5-(3,5-dimethyl-1*H*-pyrazol-1-yl)-2-((diphenylmethylene)amino)-5-oxo-3-((*p*-tolylloxy)methyl)pentanoate (**6e**): colorless sticky oil, 76% yield, 96% *ee*,  $[\alpha]_D^{20} = -44.8$  ( $c = 0.11$ ,  $\text{CH}_2\text{Cl}_2$ ).  $^1\text{H}$  NMR (400 MHz, Acetone- $d_6$ )  $\delta$  7.65 – 7.58 (m, 2H), 7.52 – 7.38 (m, 4H), 7.38 – 7.31 (m, 2H), 7.19 – 7.11 (m, 2H), 7.08 – 7.00 (m, 2H), 6.78 – 6.70 (m, 2H), 6.03 (s, 1H), 4.38 (d,  $J = 4.2$  Hz, 1H), 4.09 (dd,  $J = 9.5, 5.1$  Hz, 1H), 3.99 – 3.91 (m, 1H), 3.64 (dd,  $J = 17.1, 4.7$  Hz, 1H), 3.43 (dd,  $J = 17.1, 8.0$  Hz, 1H), 3.39 – 3.30 (m, 1H), 2.49 (d,  $J = 1.0$  Hz, 3H), 2.22 (s, 3H), 2.17 (s, 3H), 1.41 (s, 9H);  $^{13}\text{C}$  NMR (101 MHz, Acetone- $d_6$ )  $\delta$  173.5, 172.2, 170.8, 157.6, 152.2, 144.4, 140.4, 137.4, 131.2, 130.6, 130.4, 129.5, 129.4,

129.3, 128.8, 128.6, 115.1, 111.8, 81.7, 68.7, 66.3, 39.3, 34.5, 28.2, 20.5, 14.7, 13.8. HRMS-ESI ( $m/z$ ):  $[M+H]^+$  calcd. for  $C_{35}H_{40}N_3O_4^+$ : 566.3013, found: 566.3005. HPLC test condition: Chiralpak OD-H, Hexane/2-Propanol = 90:10, flow rate 0.8 mL/min, test wavelength 254 nm,  $t_R$  (major) = 5.089 min and 6.757 min,  $t_R$  (minor) = 6.221 min and 9.777 min, dr > 20:1.

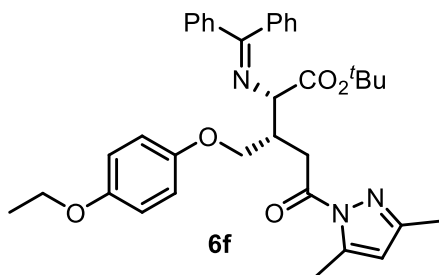

*tert*-Butyl (2*S*,3*S*)-5-(3,5-dimethyl-1*H*-pyrazol-1-yl)-2-((diphenylmethylene)amino)-3-((4-ethoxyphenoxy)methyl)-5-oxopentanoate (**6f**): colorless sticky oil, 71% yield, 95% *ee*,  $[\alpha]_D^{20} = -35.3^\circ$  ( $c = 0.11$ ,  $CH_2Cl_2$ ).  $^1H$  NMR (400 MHz, Acetone- $d_6$ )  $\delta$  7.65 – 7.58 (m, 2H), 7.51 – 7.45 (m, 3H), 7.44 – 7.38 (m, 1H), 7.38 – 7.30 (m, 2H), 7.16 (dd,  $J = 6.6, 3.0$  Hz, 2H), 6.84 – 6.73 (m, 4H), 6.02 (s, 1H), 4.39 (d,  $J = 4.2$  Hz, 1H), 4.06 (dd,  $J = 9.4, 5.2$  Hz, 1H), 3.98 – 3.89 (m, 3H), 3.64 (dd,  $J = 17.1, 4.7$  Hz, 1H), 3.43 (dd,  $J = 17.1, 8.0$  Hz, 1H), 3.39 – 3.30 (m, 1H), 2.49 (s, 3H), 2.18 (s, 3H), 1.41 (s, 9H), 1.31 (t,  $J = 7.0$  Hz, 3H);  $^{13}C$  NMR (101 MHz, Acetone- $d_6$ )  $\delta$  173.5, 172.2, 170.9, 154.2, 153.6, 152.2, 144.4, 140.4, 137.4, 131.3, 129.5, 129.4, 129.3, 128.9, 128.6, 116.1, 116.0, 111.8, 81.7, 69.2, 66.3, 64.3, 39.4, 34.5, 28.2, 15.3, 14.7, 13.9. HRMS-ESI ( $m/z$ ):  $[M+H]^+$  calcd. for  $C_{36}H_{42}N_3O_5^+$ : 596.3119, found: 596.3112. HPLC test condition: Chiralpak OD-H, Hexane/2-Propanol = 80:20, flow rate 0.8 mL/min, test wavelength 254 nm,  $t_R$  (major) = 5.493 min and 8.428 min,  $t_R$  (minor) = 6.414 min and 8.428 min, dr > 20:1.

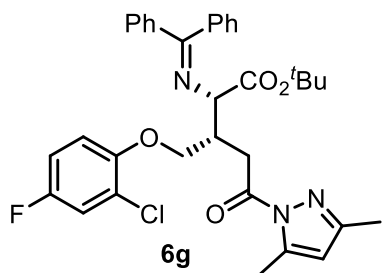

*tert*-Butyl (2*S*,3*S*)-3-((2-chloro-4-fluorophenoxy)methyl)-5-(3,5-dimethyl-1*H*-pyrazol-1-yl)-2-((diphenylmethylene)amino)-5-oxopentanoate (**6g**): colorless sticky oil, 70% yield, 97% *ee*,  $[\alpha]_D^{20} = -103.8$  ( $c = 0.11$ ,  $CH_2Cl_2$ ).  $^1H$  NMR (400 MHz, Acetone- $d_6$ )  $\delta$  7.62 – 7.55 (m, 2H), 7.50 – 7.39 (m, 4H), 7.38 – 7.30 (m, 2H), 7.24 – 7.17 (m, 3H), 7.14 (dd,  $J = 9.1, 4.9$  Hz, 1H), 7.07 – 7.00 (m, 1H), 6.00 (s, 1H), 4.47 (d,  $J = 4.7$  Hz, 1H), 4.21 – 4.11 (m, 2H), 3.69 – 3.59 (m, 1H), 3.47 – 3.36 (m, 2H), 2.47 (s, 3H), 2.16 (s, 3H), 1.39 (s, 9H);  $^{13}C$  NMR (101 MHz, Acetone- $d_6$ )  $\delta$  173.4, 172.4, 170.7, 157.2 (d,  $J = 239.9$  Hz), 152.2, 151.9 (d,  $J = 2.9$  Hz), 144.5, 140.4, 137.2, 131.3, 129.5, 129.4, 129.3, 128.7 (d,  $J = 20.6$  Hz), 123.8 (d,  $J = 10.8$  Hz), 117.9 (d,  $J = 26.4$  Hz), 115.2, 115.1 (d,  $J = 3.3$  Hz), 114.9, 111.7, 81.8, 70.5, 66.3, 39.4, 34.5, 28.1, 14.6, 13.8;  $^{19}F$  NMR (376 MHz, Acetone- $d_6$ )  $\delta$  54.0. HRMS-ESI ( $m/z$ ):  $[M+H]^+$  calcd. for  $C_{34}H_{35}ClFN_3O_4^+$ : 604.2373, found: 604.2361. HPLC test condition: Chiralpak OD-H, Hexane/2-Propanol = 96:4, flow rate 0.8 mL/min, test wavelength 254 nm,  $t_R$  (minor) = 7.601 min,  $t_R$  (major) = 10.944 min, dr > 20:1.

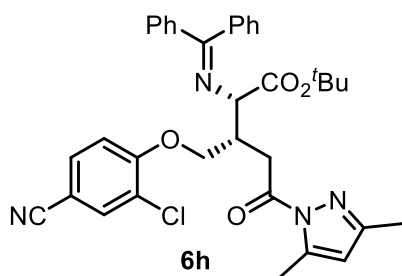

*tert*-Butyl (2*S*,3*S*)-3-((2-chloro-4-cyanophenoxy)methyl)-5-(3,5-dimethyl-1*H*-pyrazol-1-yl)-2-((diphenylmethylene)amino)-5-oxopentanoate (**6h**): white solid, 73% yield, m.p. 62.0-62.9 °C, 97% *ee*,  $[\alpha]_D^{20} = -73.6$  ( $c = 0.11$ ,  $CH_2Cl_2$ ).  $^1H$  NMR (400 MHz, Acetone- $d_6$ )  $\delta$  7.79 (d,  $J = 2.1$  Hz, 1H), 7.69 (dd,  $J = 8.6, 2.0$  Hz, 1H), 7.63 – 7.55 (m, 2H), 7.50 – 7.38 (m, 4H), 7.34

(t,  $J = 8.5$  Hz, 3H), 7.22 – 7.14 (m, 2H), 6.01 (d,  $J = 1.1$  Hz, 1H), 4.47 (d,  $J = 4.5$  Hz, 1H), 4.34 (dd,  $J = 9.7, 4.7$  Hz, 1H), 4.27 (dd,  $J = 9.7, 6.9$  Hz, 1H), 3.71 – 3.59 (m, 1H), 3.51 – 3.38 (m, 2H), 2.48 (d,  $J = 1.0$  Hz, 3H), 2.16 (s, 3H), 1.40 (s, 9H);  $^{13}\text{C}$  NMR (101 MHz, Acetone- $d_6$ )  $\delta$  173.3, 172.6, 170.6, 158.7, 152.3, 144.6, 140.4, 137.1, 134.1, 133.7, 131.3, 129.5, 129.4, 129.4, 128.8, 128.6, 124.1, 118.4, 114.8, 111.8, 105.5, 82.0, 70.5, 66.2, 39.2, 34.4, 28.1, 14.6, 13.8. HRMS-ESI ( $m/z$ ):  $[\text{M}+\text{H}]^+$  calcd. for  $\text{C}_{35}\text{H}_{36}\text{ClN}_4\text{O}_4^+$ : 611.2420, found: 611.2417 HPLC test condition: Chiralpak AD-H, Hexane/2-Propanol = 90:10, flow rate 1.0 mL/min, test wavelength 254 nm,  $t_R$  (minor) = 6.476 min and 9.802 min,  $t_R$  (major) = 11.126 min and 20.032 min, dr > 20:1.

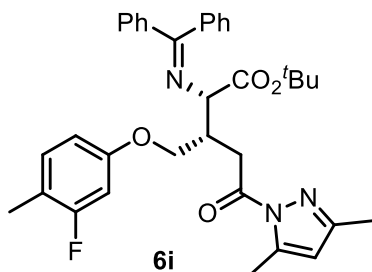

*tert*-Butyl (2*S*,3*S*)-5-(3,5-dimethyl-1*H*-pyrazol-1-yl)-2-((diphenylmethylene)amino)-3-((3-fluoro-4-methylphenoxy)methyl)-5-oxopentanoate (**6i**): colorless sticky oil, 74% yield, 98% *ee*,  $[\alpha]_D^{20} = -64.0$  ( $c = 0.10$ ,  $\text{CH}_2\text{Cl}_2$ ).  $^1\text{H}$  NMR (400 MHz, Acetone- $d_6$ )  $\delta$  7.65 – 7.57 (m, 2H), 7.52 – 7.38 (m, 4H), 7.38 – 7.30 (m, 2H), 7.18 – 7.05 (m, 3H), 6.59 (d,  $J = 10.3$  Hz, 2H), 6.03 (s, 1H), 4.36 (d,  $J = 4.2$  Hz, 1H), 4.13 (dd,  $J = 9.6, 5.1$  Hz, 1H), 3.98 (dd,  $J = 9.6, 8.2$  Hz, 1H), 3.64 (dd,  $J = 17.2, 4.6$  Hz, 1H), 3.44 (dd,  $J = 17.1, 8.0$  Hz, 1H), 3.39 – 3.30 (m, 1H), 2.49 (d,  $J = 1.0$  Hz, 3H), 2.17 (s, 3H), 2.14 (d,  $J = 1.9$  Hz, 3H), 1.41 (s, 9H);  $^{13}\text{C}$  NMR (101 MHz, Acetone- $d_6$ )  $\delta$  173.4, 172.3, 170.8, 162.3 (d,  $J = 242.8$  Hz), 159.0 (d,  $J = 10.5$  Hz), 152.2, 144.5, 140.4, 137.4, 132.5 (d,  $J = 6.7$  Hz), 131.3, 129.5, 129.4, 129.3, 128.9, 128.6, 116.9 (d,  $J = 17.6$  Hz), 111.8, 111.1 (d,  $J = 3.0$  Hz), 102.6 (d,  $J = 25.8$  Hz), 81.8, 69.1, 66.2, 39.1, 34.4, 28.2, 14.6, 13.8, 13.7 (d,  $J = 3.5$  Hz);  $^{19}\text{F}$  NMR (376 MHz, Acetone- $d_6$ )  $\delta$  60.6. HRMS-ESI ( $m/z$ ):  $[\text{M}+\text{H}]^+$  calcd. for  $\text{C}_{35}\text{H}_{39}\text{FN}_3\text{O}_4^+$ : 584.2919, found: 584.2909. HPLC test condition: Chiralpak OD-H, Hexane/2-Propanol = 93:7, flow rate 1.0 mL/min, test wavelength 254 nm,  $t_R$  (major) = 5.014 min and 5.743 min,  $t_R$  (minor) = 6.777 min and 7.600 min, dr > 20:1.

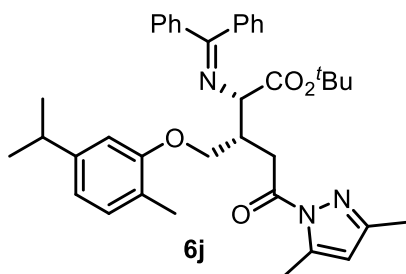

*tert*-Butyl (2*S*,3*S*)-5-(3,5-dimethyl-1*H*-pyrazol-1-yl)-2-((diphenylmethylene)amino)-3-((5-isopropyl-2-methylphenoxy)methyl)-5-oxopentanoate (**6j**): colorless sticky oil, 83% yield, 98% *ee*,  $[\alpha]_D^{20} = -55.8$  ( $c = 0.11$ ,  $\text{CH}_2\text{Cl}_2$ ).  $^1\text{H}$  NMR (400 MHz, Acetone- $d_6$ )  $\delta$  7.63 – 7.57 (m, 2H), 7.48 – 7.39 (m, 4H), 7.38 – 7.31 (m, 2H), 7.19 – 7.12 (m, 2H), 6.96 (dd,  $J = 7.6, 0.9$  Hz, 1H), 6.81 (d,  $J = 1.6$  Hz, 1H), 6.67 (dd,  $J = 7.6, 1.7$  Hz, 1H), 6.00 (d,  $J = 1.1$  Hz, 1H), 4.45 (d,  $J = 4.8$  Hz, 1H), 4.12 – 4.05 (m, 2H), 3.68 – 3.58 (m, 1H), 3.47 – 3.37 (m, 2H), 2.83 – 2.75 (m, 1H), 2.49 (d,  $J = 1.0$  Hz, 3H), 2.16 (s, 3H), 1.87 (s, 3H), 1.39 (s, 9H), 1.16 (d,  $J = 6.9$  Hz, 6H);  $^{13}\text{C}$  NMR (101 MHz, Acetone- $d_6$ )  $\delta$  173.6, 172.2, 171.0, 157.7, 152.2, 148.7, 144.5, 140.5, 137.4, 131.2, 131.0, 129.4, 129.3, 128.8, 128.6, 124.4, 118.8, 111.7, 110.1, 81.7, 68.6, 66.7, 39.6, 34.8, 34.6, 28.2, 24.4, 16.0, 14.6, 13.8. HRMS-ESI ( $m/z$ ):  $[\text{M}+\text{H}]^+$  calcd. for  $\text{C}_{38}\text{H}_{46}\text{N}_3\text{O}_4^+$ : 608.3483, found: 608.3477. HPLC test condition: Chiralpak OD-H, Hexane/2-Propanol = 97:3, flow rate 0.8 mL/min, test wavelength 254 nm,  $t_R$  (major) = 13.323 min and 15.850 min,  $t_R$  (minor) = 20.389 min, dr > 20:1.

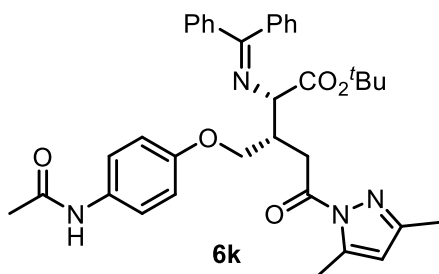

*tert*-Butyl (2*S*,3*S*)-3-((4-acetamidophenoxy)methyl)-5-(3,5-dimethyl-1*H*-pyrazol-1-yl)-2-((diphenylmethylene)amino)-5-oxopentanoate (**6k**): white solid, 65% yield, m.p. 68.7-71.3 °C, 86% *ee*,  $[\alpha]_D^{20} = -41.0$  ( $c = 0.10$ , CH<sub>2</sub>Cl<sub>2</sub>). <sup>1</sup>H NMR (400 MHz, Acetone-*d*<sub>6</sub>) δ 7.64 – 7.57 (m, 2H), 7.56 – 7.45 (m, 5H), 7.44 – 7.39 (m, 1H), 7.38 – 7.30 (m, 2H), 7.18 – 7.10 (m, 2H), 6.82 – 6.74 (m, 2H), 6.03 (s, 1H), 4.38 (d,  $J = 4.1$  Hz, 1H), 4.10 (dd,  $J = 9.5, 5.1$  Hz, 1H), 4.01 – 3.91 (m, 1H), 3.69 – 3.59 (m, 1H), 3.44 (dd,  $J = 17.1, 7.9$  Hz, 1H), 3.39 – 3.30 (m, 1H), 2.49 (s, 3H), 2.17 (s, 3H), 2.03 (s, 3H), 1.41 (s, 9H); <sup>13</sup>C NMR (101 MHz, Acetone-*d*<sub>6</sub>) δ 173.5, 172.3, 170.9, 168.4, 168.3, 155.5, 152.2, 144.5, 140.4, 137.4, 131.3, 129.5, 129.4, 129.3, 128.9, 128.6, 121.4, 121.3, 115.2, 111.8, 81.8, 68.9, 66.3, 39.3, 34.4, 28.2, 24.1, 14.7, 13.8. HRMS-ESI (*m/z*): [M+H]<sup>+</sup> calcd. for C<sub>36</sub>H<sub>41</sub>N<sub>4</sub>O<sub>5</sub><sup>+</sup>: 609.3071, found: 609.3066. HPLC test condition: Chiralpak OD-H, Hexane/2-Propanol = 80:20, flow rate 0.9 mL/min, test wavelength 254 nm, *t*<sub>R</sub> (minor) = 6.174 min, *t*<sub>R</sub> (major) = 7.695 min, dr > 20:1.

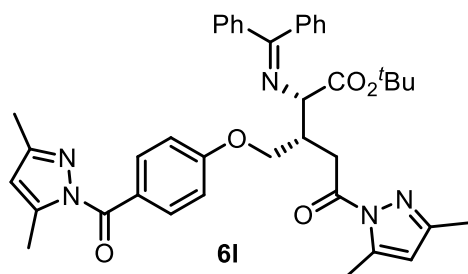

*tert*-Butyl (2*S*,3*S*)-5-(3,5-dimethyl-1*H*-pyrazol-1-yl)-3-((4-(3,5-dimethyl-1*H*-pyrazole-1-carbonyl)phenoxy)methyl)-2-((diphenylmethylene)amino)-5-oxopentanoate (**6l**): white solid, 46% yield, m.p. 59.3-62.1 °C, 98% *ee*,  $[\alpha]_D^{20} = -15.0$  ( $c = 0.12$ , CH<sub>2</sub>Cl<sub>2</sub>). <sup>1</sup>H NMR (400 MHz, Acetone-*d*<sub>6</sub>) δ 8.06 – 7.97 (m, 2H), 7.67 – 7.58 (m, 2H), 7.53 – 7.46 (m, 3H), 7.46 – 7.40 (m, 1H), 7.39 – 7.32 (m, 2H), 7.20 – 7.12 (m, 2H), 6.99 – 6.91 (m, 2H), 6.16 (d,  $J = 1.1$  Hz, 1H), 6.04 (d,  $J = 1.1$  Hz, 1H), 4.39 (d,  $J = 4.0$  Hz, 1H), 4.28 (dd,  $J = 9.6, 5.1$  Hz, 1H), 4.12 (dd,  $J = 9.7, 8.2$  Hz, 1H), 3.66 (dd,  $J = 17.2, 4.6$  Hz, 1H), 3.48 (dd,  $J = 17.2, 8.0$  Hz, 1H), 3.44 – 3.34 (m, 1H), 2.55 (d,  $J = 1.0$  Hz, 3H), 2.50 (d,  $J = 1.0$  Hz, 3H), 2.18 (d,  $J = 0.9$  Hz, 6H), 1.43 (s, 9H); <sup>13</sup>C NMR (101 MHz, Acetone-*d*<sub>6</sub>) δ 173.4, 172.4, 170.7, 167.9, 163.0, 152.3, 152.1, 145.5, 144.5, 140.4, 137.3, 134.7, 131.3, 129.6, 129.4, 129.4, 128.9, 128.6, 126.5, 114.4, 111.8, 111.4, 81.9, 69.1, 66.2, 39.2, 34.4, 28.2, 14.7, 14.3, 13.8, 13.8. HRMS-ESI (*m/z*): [M+H]<sup>+</sup> calcd. for C<sub>40</sub>H<sub>44</sub>N<sub>5</sub>O<sub>5</sub><sup>+</sup>: 674.3337, found: 674.3336. HPLC test condition: Chiralpak OD-H, Hexane/2-Propanol = 95:5, flow rate 0.8 mL/min, test wavelength 254 nm, *t*<sub>R</sub> (major) = 9.692 min, *t*<sub>R</sub> (minor) = 11.523 min, dr > 20:1.

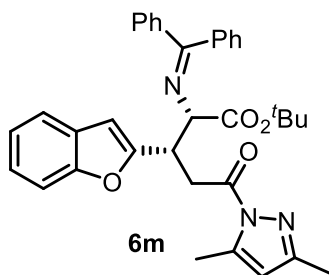

*tert*-Butyl (2*S*,3*S*)-3-(benzofuran-2-yl)-5-(3,5-dimethyl-1*H*-pyrazol-1-yl)-2-((diphenylmethylene)amino)-5-oxopentanoate (**6m**): colorless sticky oil, 70% yield, 93% *ee*,  $[\alpha]_D^{20} = -13.3$  ( $c = 0.11$ , CH<sub>2</sub>Cl<sub>2</sub>). <sup>1</sup>H NMR (400 MHz, Acetone-*d*<sub>6</sub>) δ 7.63 – 7.53 (m, 2H), 7.51 – 7.28 (m, 8H), 7.26 – 7.20 (m, 1H), 7.19 – 7.12 (m, 1H), 6.93 (d,  $J = 7.1$  Hz, 2H), 6.59 (s, 1H), 5.99 (s, 1H), 4.52 – 4.40 (m, 2H), 3.99 – 3.86 (m, 1H), 3.86 – 3.76 (m, 1H), 2.42 (s, 3H), 2.20 (s, 3H), 1.37 (s, 9H); <sup>13</sup>C NMR (101 MHz, Acetone-*d*<sub>6</sub>) δ 172.5, 172.3, 169.9, 159.2, 155.5, 152.5, 144.5, 140.2, 137.0, 131.4, 129.6, 129.5, 129.3, 128.9, 128.5, 124.6, 123.5, 121.5, 111.9, 111.6, 104.3, 82.0, 69.3, 40.1, 35.7, 28.1, 14.6, 13.9. HRMS-ESI (*m/z*): [M+H]<sup>+</sup> calcd. for

C<sub>35</sub>H<sub>36</sub>N<sub>3</sub>O<sub>4</sub><sup>+</sup>: 562.2706, found: 562.2701. HPLC test condition: Chiralpak AD-H, Hexane/2-Propanol = 90:10, flow rate 1.0 mL/min, test wavelength 254 nm, *t<sub>R</sub>* (minor) = 5.852 min and 8.134 min, *t<sub>R</sub>* (major) = 6.594 min and 14.373 min, dr = 96:4.

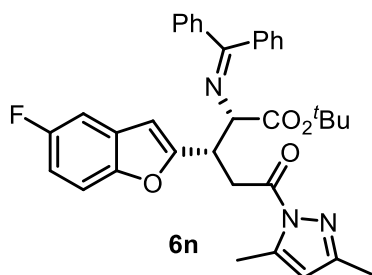

*tert*-Butyl (2*S*,3*S*)-5-(3,5-dimethyl-1*H*-pyrazol-1-yl)-2-((diphenylmethylene)amino)-3-(5-fluorobenzofuran-2-yl)-5-oxopentanoate (**6n**): colorless sticky oil, 67% yield, 97% *ee*,  $[\alpha]_D^{20} = +5.0$  (*c* = 0.10, CH<sub>2</sub>Cl<sub>2</sub>). <sup>1</sup>H NMR (400 MHz, Acetone-*d*<sub>6</sub>)  $\delta$  7.64 – 7.55 (m, 2H), 7.51 – 7.31 (m, 7H), 7.25 (dd, *J* = 8.8, 2.7 Hz, 1H), 7.03 (td, *J* = 9.2, 2.7 Hz, 1H), 6.96 (d, *J* = 7.3 Hz, 2H), 6.65 (s, 1H), 6.01 (s, 1H), 4.51 – 4.41 (m, 2H), 3.98 – 3.88 (m, 1H), 3.88 – 3.79 (m, 1H), 2.44 (s, 3H), 2.21 (s, 3H), 1.39 (s, 9H); <sup>13</sup>C NMR (101 MHz, Acetone-*d*<sub>6</sub>)  $\delta$  172.5, 169.8, 161.4, 160.0 (d, *J* = 236.1 Hz), 152.5, 151.7, 144.6, 140.2, 137.0, 131.4, 130.5 (d, *J* = 11.0 Hz), 129.6, 129.5, 129.3, 128.9, 128.5, 112.5 (d, *J* = 9.6 Hz), 112.1, 111.9, 111.8, 107.0 (d, *J* = 25.2 Hz), 104.7 (d, *J* = 3.9 Hz), 82.1, 69.2, 40.2, 35.7, 28.1, 14.6, 13.9; <sup>19</sup>F NMR (376 MHz, Acetone-*d*<sub>6</sub>)  $\delta$  55.1. HRMS-ESI (*m/z*): [M+H]<sup>+</sup> calcd. for C<sub>35</sub>H<sub>35</sub>N<sub>3</sub>O<sub>4</sub>F<sup>+</sup>: 580.2612, found: 580.2607. HPLC test condition: Chiralpak AD-H, Hexane/2-Propanol = 90:10, flow rate 1.0 mL/min, test wavelength 254 nm, *t<sub>R</sub>* (minor) = 5.875 min and 9.239 min, *t<sub>R</sub>* (major) = 7.463 min and 19.360 min, dr = 98:2.

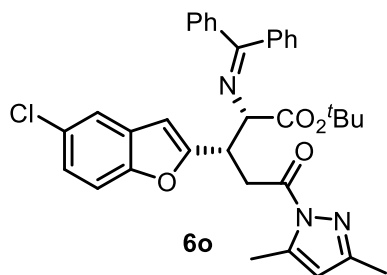

*tert*-Butyl (2*S*,3*S*)-3-(5-chlorobenzofuran-2-yl)-5-(3,5-dimethyl-1*H*-pyrazol-1-yl)-2-((diphenylmethylene)amino)-5-oxopentanoate (**6o**): colorless sticky oil, 56% yield, 98% *ee*,  $[\alpha]_D^{20} = +12.4$  (*c* = 0.11, CH<sub>2</sub>Cl<sub>2</sub>). <sup>1</sup>H NMR (400 MHz, Acetone-*d*<sub>6</sub>)  $\delta$  7.62 – 7.53 (m, 3H), 7.50 – 7.33 (m, 7H), 7.28 – 7.22 (m, 1H), 6.96 (d, *J* = 7.4 Hz, 2H), 6.64 (s, 1H), 6.02 (s, 1H), 4.50 – 4.40 (m, 2H), 3.98 – 3.78 (m, 2H), 2.44 (s, 3H), 2.21 (s, 3H), 1.39 (s, 9H); <sup>13</sup>C NMR (101 MHz, Acetone-*d*<sub>6</sub>)  $\delta$  172.5, 172.4, 169.8, 161.2, 153.9, 152.6, 144.6, 140.2, 137.0, 131.4, 131.1, 129.6, 129.5, 129.3, 128.9, 128.5, 124.6, 121.1, 113.0, 111.9, 104.2, 82.1, 69.2, 40.1, 35.7, 28.1, 14.6, 13.9. HRMS-ESI (*m/z*): [M+H]<sup>+</sup> calcd. for C<sub>35</sub>H<sub>35</sub>N<sub>3</sub>O<sub>4</sub>Cl<sup>+</sup>: 596.2316, found: 596.2311. HPLC test condition: Chiralpak AD-H, Hexane/2-Propanol = 90:10, flow rate 1.0 mL/min, test wavelength 254 nm, *t<sub>R</sub>* (minor) = 5.819 min and 10.432 min, *t<sub>R</sub>* (major) = 8.208 min and 13.349 min, dr = 97:3.

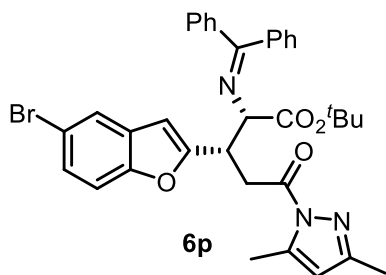

*tert*-Butyl (2*S*,3*S*)-3-(5-bromobenzofuran-2-yl)-5-(3,5-dimethyl-1*H*-pyrazol-1-yl)-2-((diphenylmethylene)amino)-5-oxopentanoate (**6p**): colorless sticky oil, 48% yield, 98% *ee*,  $[\alpha]_D^{20} = +23.3$  (*c* = 0.11, CH<sub>2</sub>Cl<sub>2</sub>). <sup>1</sup>H NMR (400 MHz, Acetone-*d*<sub>6</sub>)  $\delta$  7.70 – 7.66 (m, 1H), 7.61 – 7.54 (m, 2H), 7.47 – 7.38 (m, 4H), 7.37 – 7.31 (m, 4H), 6.98 – 6.90 (m, 2H), 6.62 (d, *J* = 0.8 Hz, 1H), 6.00 (d, *J* = 1.1 Hz, 1H), 4.48 – 4.39 (m, 2H), 3.94 – 3.77 (m, 2H), 2.42 (d, *J* = 1.0 Hz, 3H), 2.19 (s, 3H), 1.37 (s, 9H); <sup>13</sup>C NMR (101 MHz, Acetone-*d*<sub>6</sub>)  $\delta$  172.5, 172.4, 169.8, 161.0, 154.2, 152.5, 144.6, 140.2, 137.0, 131.7, 131.4, 129.6, 129.5, 129.3, 128.9, 128.5, 127.3, 124.2, 116.2, 113.5, 111.9, 104.0, 82.1, 69.1, 40.1, 35.7, 28.1, 14.5, 13.9.

HRMS-ESI ( $m/z$ ):  $[M+H]^+$  calcd. for  $C_{35}H_{35}N_3O_4Br^+$ : 640.1811, found: 640.1804. HPLC test condition: Chiralpak AD-H, Hexane/2-Propanol = 90:10, flow rate 1.0 mL/min, test wavelength 254 nm,  $t_R$  (major) = 8.671 min and 12.616 min,  $t_R$  (minor) = 11.198 min and 21.486 min,  $dr$  = 92:8.

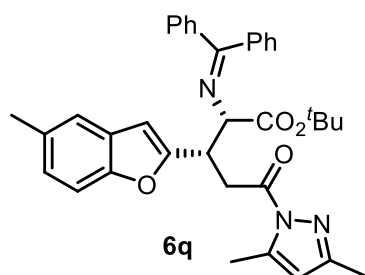

*tert*-Butyl (2*S*,3*S*)-5-(3,5-dimethyl-1*H*-pyrazol-1-yl)-2-((diphenylmethylene)amino)-3-(5-methylbenzofuran-2-yl)-5-oxopentanoate (**6q**): colorless sticky oil, 27% yield, 93.5% *ee*,  $[\alpha]_D^{20}$  = +4.7 ( $c$  = 0.11,  $CH_2Cl_2$ ).  $^1H$  NMR (400 MHz, Acetone- $d_6$ )  $\delta$  7.57 (d,  $J$  = 7.9 Hz, 2H), 7.49 – 7.29 (m, 6H), 7.24 (d,  $J$  = 9.3 Hz, 2H), 7.04 (d,  $J$  = 8.3 Hz, 1H), 6.93 (d,  $J$  = 7.1 Hz, 2H), 6.50 (s, 1H), 5.99 (s, 1H), 4.50 – 4.39 (m, 2H), 3.91 (dd,  $J$  = 17.3, 7.9 Hz, 1H), 3.80 (dd,  $J$  = 17.3, 4.3 Hz, 1H), 2.42 (s, 3H), 2.34 (s, 3H), 2.20 (s, 3H), 1.38 (s, 9H);  $^{13}C$  NMR (101 MHz, Acetone- $d_6$ )  $\delta$  172.6, 172.3, 169.9, 159.3, 153.9, 152.4, 144.5, 140.2, 137.0, 132.7, 131.4, 129.6, 129.6, 129.5, 129.3, 128.9, 128.5, 125.7, 121.4, 111.9, 111.1, 104.1, 82.0, 69.3, 40.1, 35.7, 28.1, 21.4, 14.6, 13.9. HRMS-ESI ( $m/z$ ):  $[M+H]^+$  calcd. for  $C_{36}H_{38}N_3O_4Br^+$ : 576.2862, found: 576.2864. HPLC test condition: Chiralpak AD-H, Hexane/2-Propanol = 90:10, flow rate 1.0 mL/min, test wavelength 254 nm,  $t_R$  (minor) = 5.429 min and 8.190 min,  $t_R$  (major) = 7.242 min and 9.885 min,  $dr$  = 99:1.

### 2.3 Typical procedure for in-situ acidic hydrolysis and lactamization to **7d**.

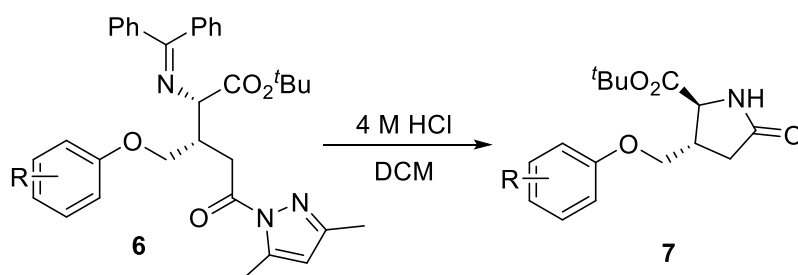

To **6d** in DCM (10.0 mL) added 4 M HCl and the mixture was stirred at r.t. for 2–3 h. After the reaction completed (detected by TLC), it was quenched by  $H_2O$  (15 mL) and extracted with DCM ( $2 \times 25$  mL). The combined organic layers were dried over  $Na_2SO_4$  and the solvents were evaporated under vacuum. The residue was purified by a flash column chromatograph to afford pure **7d** as a white solid.

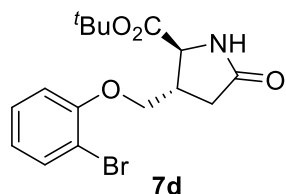

*tert*-Butyl (2*S*,3*S*)-3-((2-bromophenoxy)methyl)-5-oxopyrrolidine-2-carboxylate (**7d**): white solid, 86% yield, m.p. 111.6–112.4  $^{\circ}C$ , 97% *ee*,  $[\alpha]_D^{20}$  = +32.8 ( $c$  = 0.10,  $CH_2Cl_2$ ).  $^1H$  NMR (400 MHz, Chloroform- $d$ )  $\delta$  7.56 (dd,  $J$  = 7.9, 1.6 Hz, 1H), 7.34 – 7.23 (m, 1H), 6.97 – 6.82 (m, 2H), 6.52 (s, 1H), 4.26 (d,  $J$  = 5.5 Hz, 1H), 4.22 – 4.09 (m, 2H), 3.01 (ddq,  $J$  = 10.4, 6.9, 5.2 Hz, 1H), 2.59 (qd,  $J$  = 17.1, 8.0 Hz, 2H), 1.50 (s, 9H);  $^{13}C$  NMR (101 MHz, Chloroform- $d$ )  $\delta$  176.3, 170.5, 154.7, 133.5, 128.5, 122.6, 113.5, 112.6, 82.8, 69.2, 57.7, 38.4, 32.8, 28.0. HRMS-ESI ( $m/z$ ):  $[M+H]^+$  calcd. for  $C_{16}H_{21}BrNO_4^+$ : 370.0648, found: 370.0655. HPLC test condition: Chiralpak AD-H, Hexane/2-Propanol = 80:20, flow rate 1.0 mL/min, test wavelength 230 nm,  $t_R$  (minor) = 16.597 min,  $t_R$  (major) = 11.036 min.

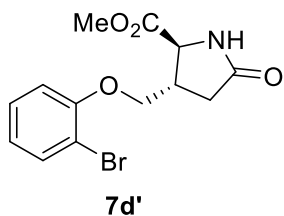

Methyl (2*S*,3*S*)-3-((2-bromophenoxy)methyl)-5-oxopyrrolidine-2-carboxylate (**7d'**): white solid, 84% yield, m.p. 93.6-94.9 °C, 93% *ee*,  $[\alpha]_D^{20} = +32.0$  ( $c = 0.10$ , CH<sub>2</sub>Cl<sub>2</sub>). <sup>1</sup>H NMR (400 MHz, Chloroform-*d*)  $\delta$  7.54 (dd,  $J = 7.8, 1.6$  Hz, 1H), 7.28 (d,  $J = 7.5$  Hz, 1H), 6.97 – 6.84 (m, 2H), 6.55 (s, 1H), 4.39 (d,  $J = 5.4$  Hz, 1H), 4.23 – 4.08 (m, 2H), 3.80 (s, 3H), 3.13 – 3.00 (m, 1H), 2.64 (dd,  $J = 17.2, 9.2$  Hz, 1H), 2.54 (dd,  $J = 17.2, 6.7$  Hz, 1H); <sup>13</sup>C NMR (101 MHz, Chloroform-*d*)  $\delta$  176.2, 171.9, 154.6, 133.5, 128.5, 122.7, 113.5, 112.6, 69.1, 57.2, 52.8, 38.4, 32.5. HRMS-ESI ( $m/z$ ):  $[M+H]^+$  calcd. for C<sub>13</sub>H<sub>15</sub>BrNO<sub>4</sub><sup>+</sup>:328.0179, found: 328.0172. HPLC test condition: Chiralpak AD-H, Hexane/2-Propanol = 80:20, flow rate 1.0 mL/min, test wavelength 230 nm,  $t_R$  (minor) = 18.966 min,  $t_R$  (major) = 15.792 min.

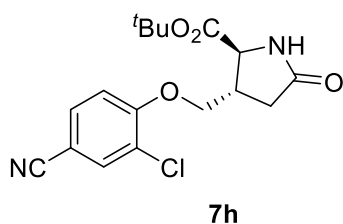

tert-Butyl (2*S*,3*S*)-3-((2-chloro-4-cyanophenoxy)methyl)-5-oxopyrrolidine-2-carboxylate (**7h**): white solid, 86% yield, m.p. 121.6-122.8 °C, 98% *ee*,  $[\alpha]_D^{20} = +43.8$  ( $c = 0.11$ , CH<sub>2</sub>Cl<sub>2</sub>). <sup>1</sup>H NMR (400 MHz, Chloroform-*d*)  $\delta$  7.67 (d,  $J = 2.0$  Hz, 1H), 7.55 (dd,  $J = 8.6, 2.0$  Hz, 1H), 6.97 (d,  $J = 8.6$  Hz, 1H), 6.28 (s, 1H), 4.27 – 4.14 (m, 3H), 3.11 – 2.96 (m, 1H), 2.63 (dd,  $J = 17.1, 9.3$  Hz, 1H), 2.47 (dd,  $J = 17.2, 6.9$  Hz, 1H), 1.48 (s, 9H); <sup>13</sup>C NMR (101 MHz, Chloroform-*d*)  $\delta$  175.6, 170.1, 157.4, 133.8, 132.4, 124.2, 117.7, 113.2, 105.6, 83.2, 69.4, 57.5, 38.2, 32.6, 28.0. HRMS-ESI ( $m/z$ ):  $[M+H]^+$  calcd. for C<sub>17</sub>H<sub>20</sub>ClN<sub>2</sub>O<sub>4</sub><sup>+</sup>: 351.1106, found: 351.1105. HPLC test condition: Chiralpak AD-H, Hexane/2-Propanol = 80:20, flow rate 1.0 mL/min, test wavelength 230 nm,  $t_R$  (minor) = 17.188 min,  $t_R$  (major) = 15.956 min.

### 3. X-ray single crystal diffraction data of **7d'**<sup>[6]</sup>

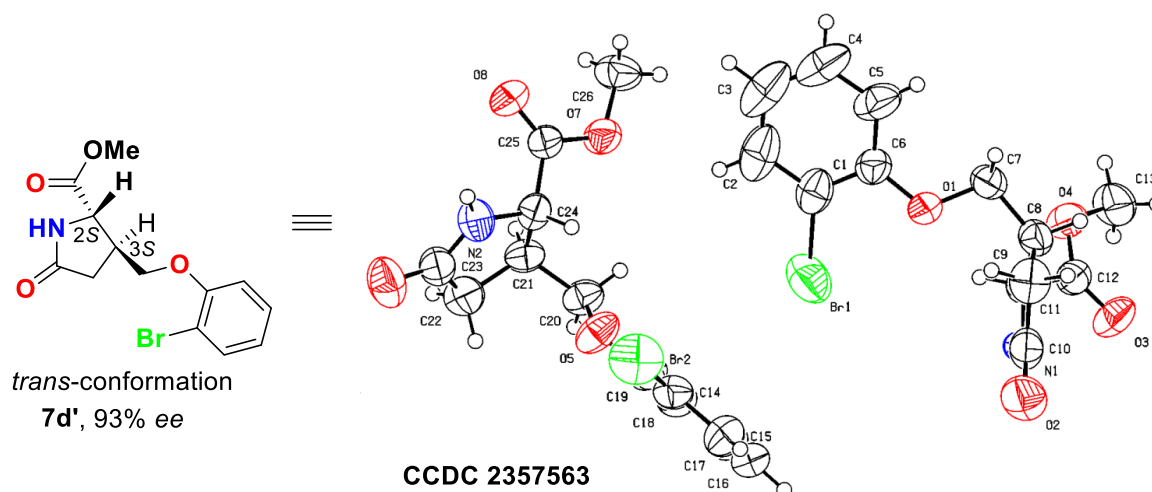

**Table 1** Crystal data and structure refinement for **7d'** (CCDC 2357563)

|                     |                                                   |
|---------------------|---------------------------------------------------|
| Identification code | ww                                                |
| Empirical formula   | C <sub>13</sub> H <sub>14</sub> BrNO <sub>4</sub> |
| Formula weight      | 328.16                                            |
| Temperature/K       | 303.00                                            |
| Crystal system      | monoclinic                                        |
| Space group         | P2 <sub>1</sub>                                   |

|                                             |                                                               |
|---------------------------------------------|---------------------------------------------------------------|
| a/Å                                         | 8.978(3)                                                      |
| b/Å                                         | 6.518(2)                                                      |
| c/Å                                         | 24.261(7)                                                     |
| $\alpha$ /°                                 | 90                                                            |
| $\beta$ /°                                  | 90.110(11)                                                    |
| $\gamma$ /°                                 | 90                                                            |
| Volume/Å <sup>3</sup>                       | 1419.7(8)                                                     |
| Z                                           | 4                                                             |
| $\rho_{\text{calc}}$ /cm <sup>3</sup>       | 1.535                                                         |
| $\mu$ /mm <sup>-1</sup>                     | 2.904                                                         |
| F(000)                                      | 664.0                                                         |
| Crystal size/mm <sup>3</sup>                | 0.11 × 0.1 × 0.08                                             |
| Radiation                                   | MoK $\alpha$ ( $\lambda$ = 0.71073)                           |
| 2 $\Theta$ range for data collection/°      | 4.536 to 56.658                                               |
| Index ranges                                | -11 ≤ h ≤ 11, -8 ≤ k ≤ 8, -32 ≤ l ≤ 32                        |
| Reflections collected                       | 16828                                                         |
| Independent reflections                     | 6753 [R <sub>int</sub> = 0.0518, R <sub>sigma</sub> = 0.0982] |
| Data/restraints/parameters                  | 6753/1/346                                                    |
| Goodness-of-fit on F <sup>2</sup>           | 1.010                                                         |
| Final R indexes [I ≥ 2 $\sigma$ (I)]        | R <sub>1</sub> = 0.0427, wR <sub>2</sub> = 0.1063             |
| Final R indexes [all data]                  | R <sub>1</sub> = 0.0990, wR <sub>2</sub> = 0.1331             |
| Largest diff. peak/hole / e Å <sup>-3</sup> | 0.27/-0.33                                                    |
| Flack parameter                             | 0.054(12)                                                     |

#### References

1. Sibi, M. P.; Itoh, K. *J. Am. Chem. Soc.*, **2007**, *129*, 8064-8065.
2. Biswas, R. G.; Ray, S. K.; Kannaujiya, V. K.; Unhale, R. A.; Singh, V. K. *Org. Biomol. Chem.*, **2021**, *19*, 4685-4690.
3. Bandar, J.S.; Lambert, T.H. *J. Am. Chem. Soc.*, **2012**, *134*, 5552-5555.
4. Wang, Z.; Hu, L.; Chekshin, N.; Zhuang, Z.; Qian, S.-Q.; Qiao, J.-X.; Yu, J.-Q. *Science*, **2021**, *374*, 1281-1285.
5. Abdel-Wahab, B. F.; Mohamed, H. A. *Phosphorus, Sulfur and Silicon and the Related Elements*, **2008**, *183*, 136-143.
6. The crystallographic data (CCDC 2357563) for **7d'**, can be obtained free of charge from the Cambridge crystallographic Data Centre via [https://www.ccdc.cam.ac.uk/data\\_request/cif](https://www.ccdc.cam.ac.uk/data_request/cif).

#### 4. NMR scanning copies

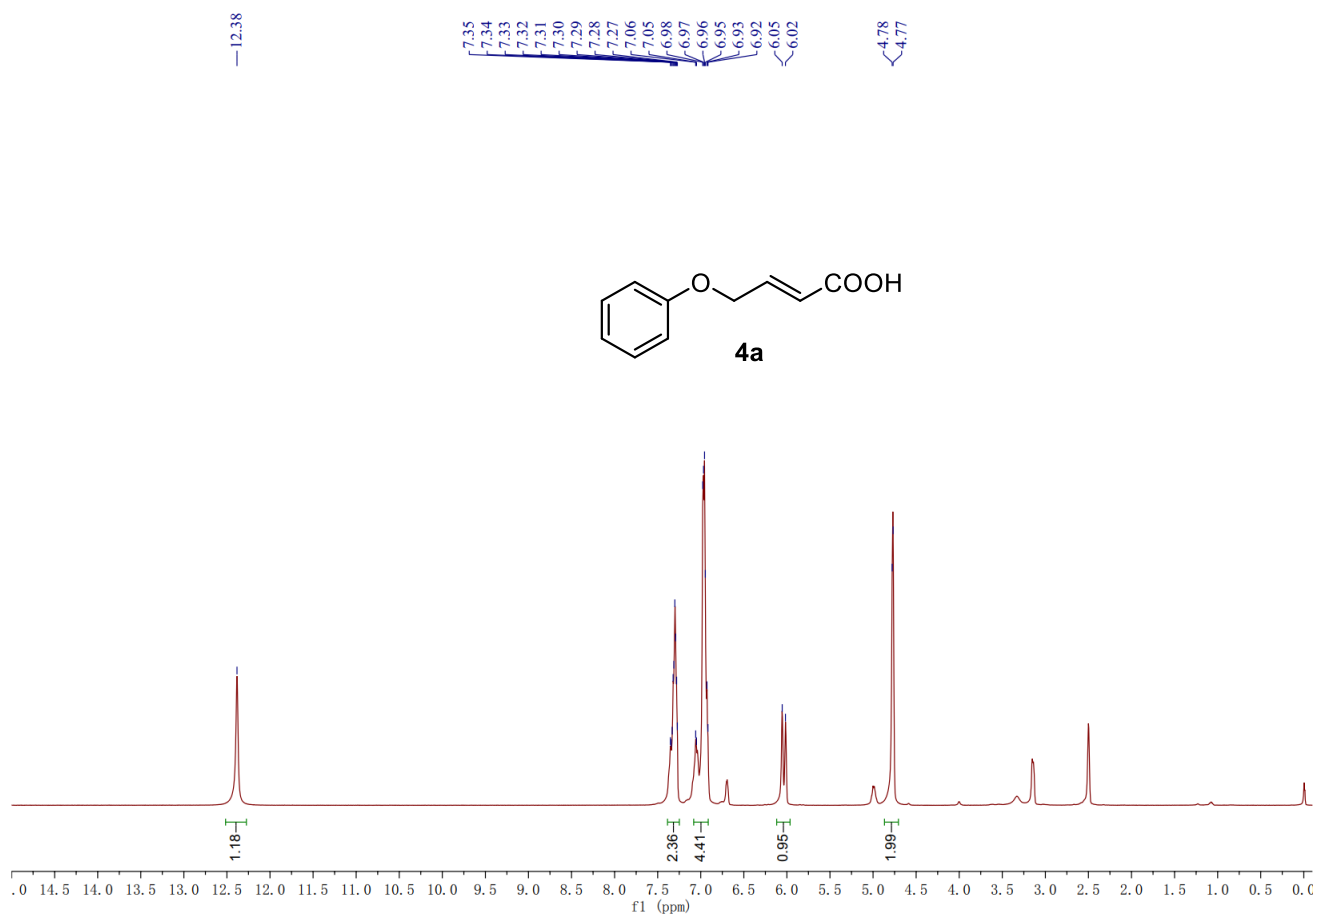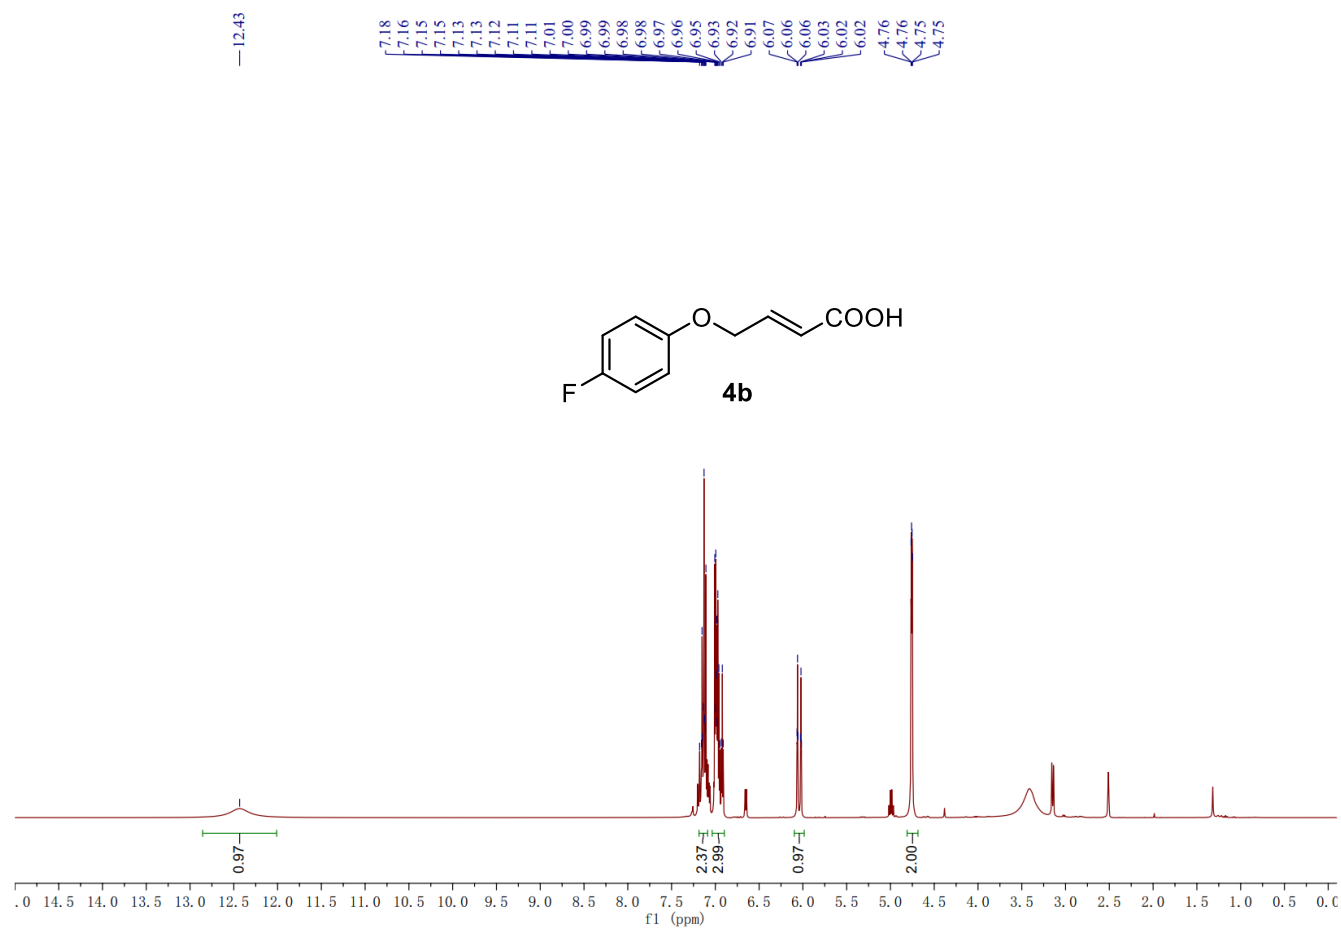

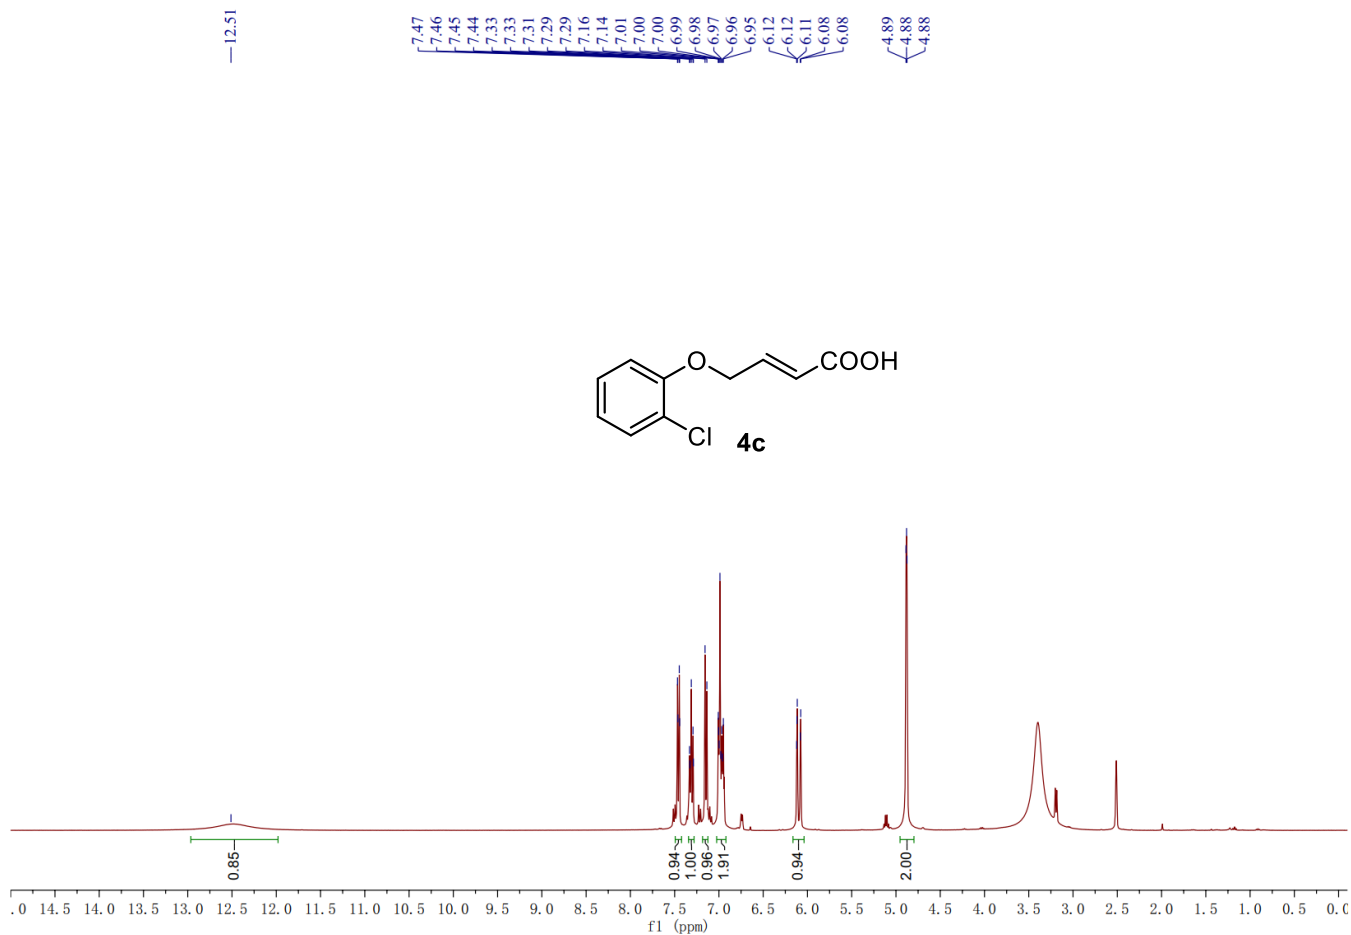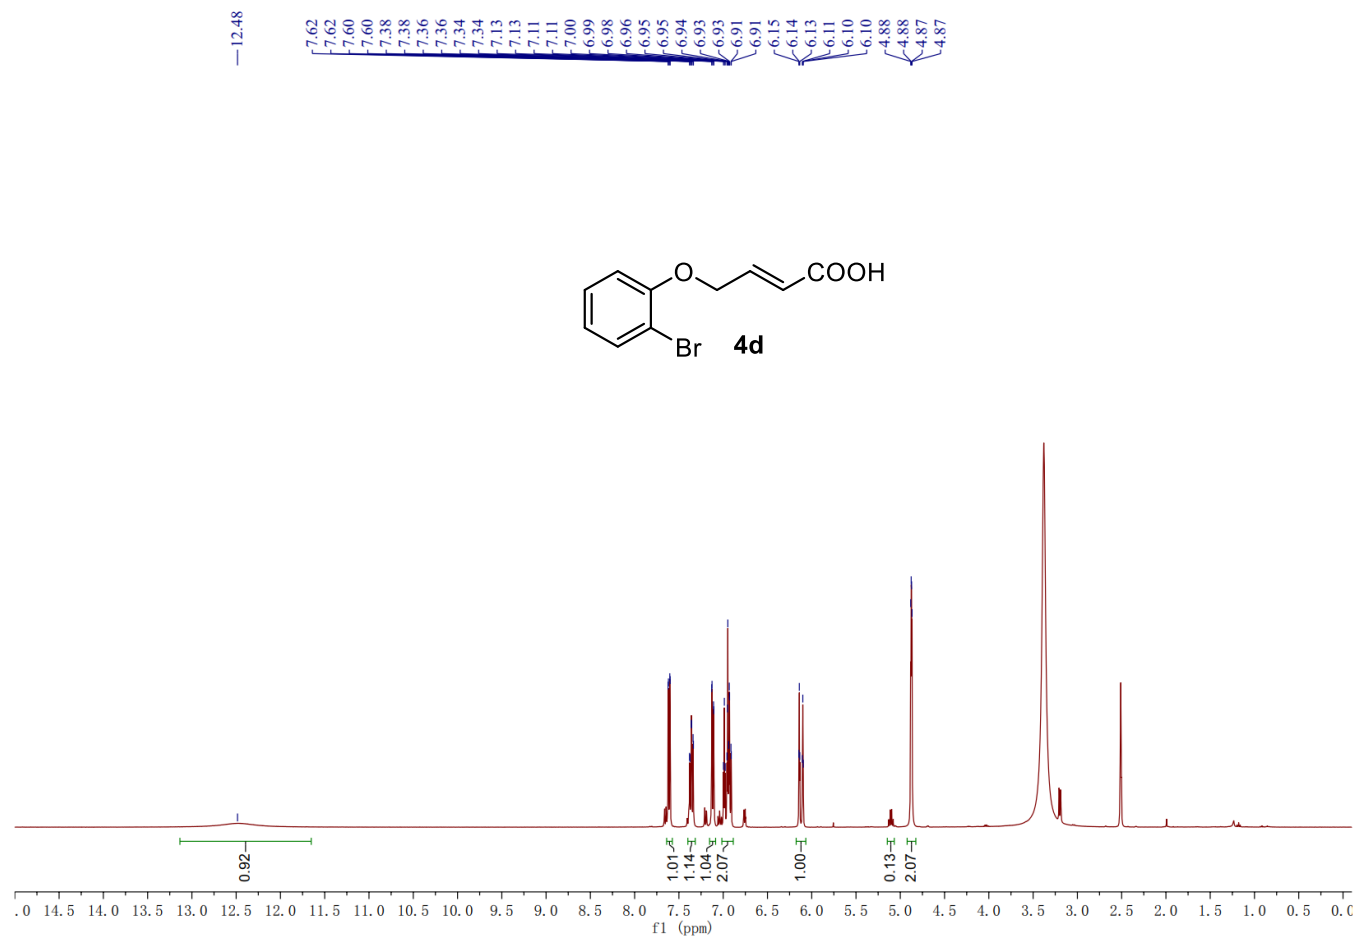

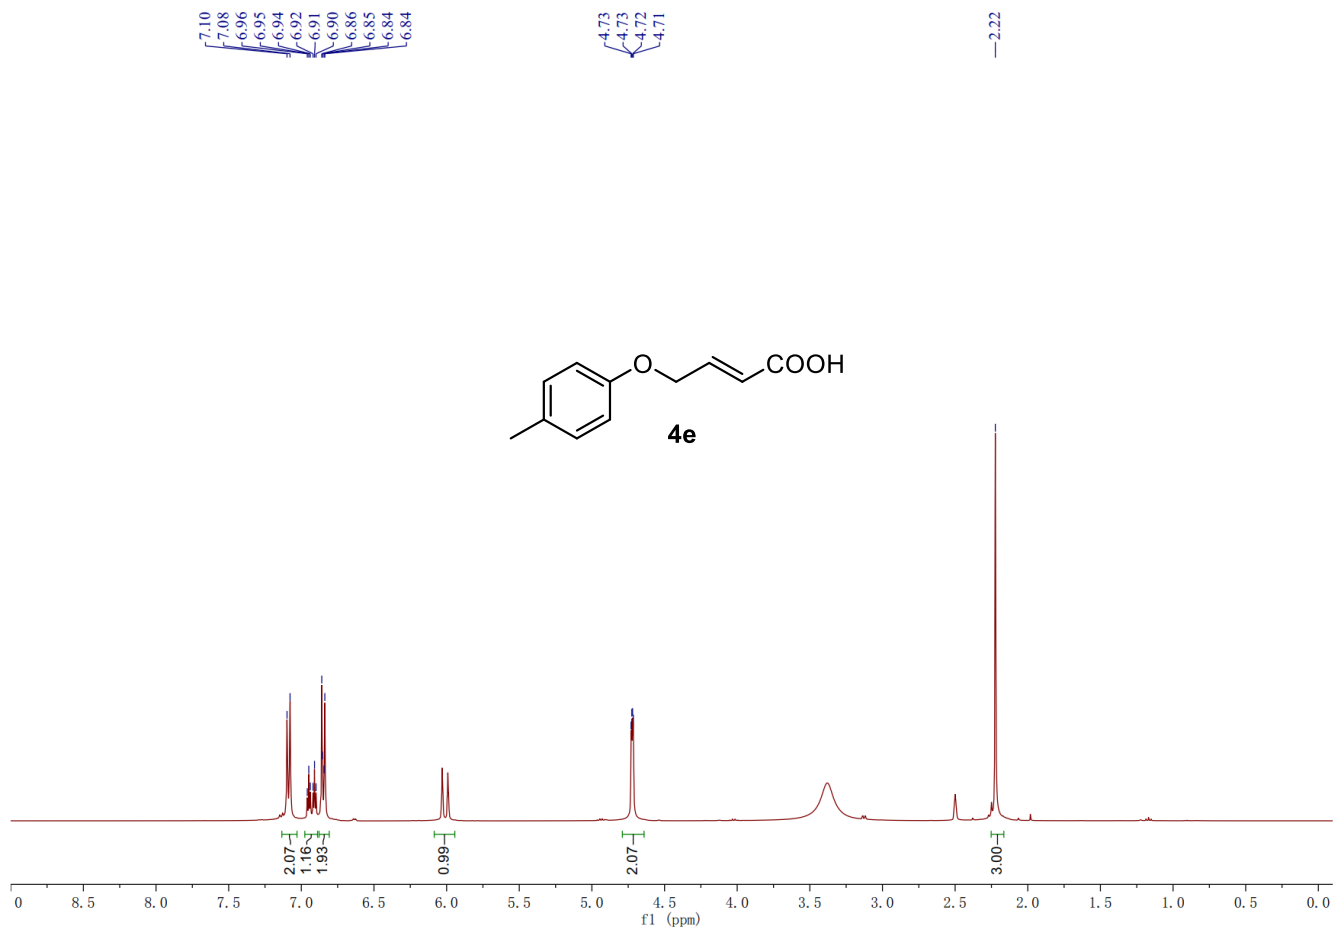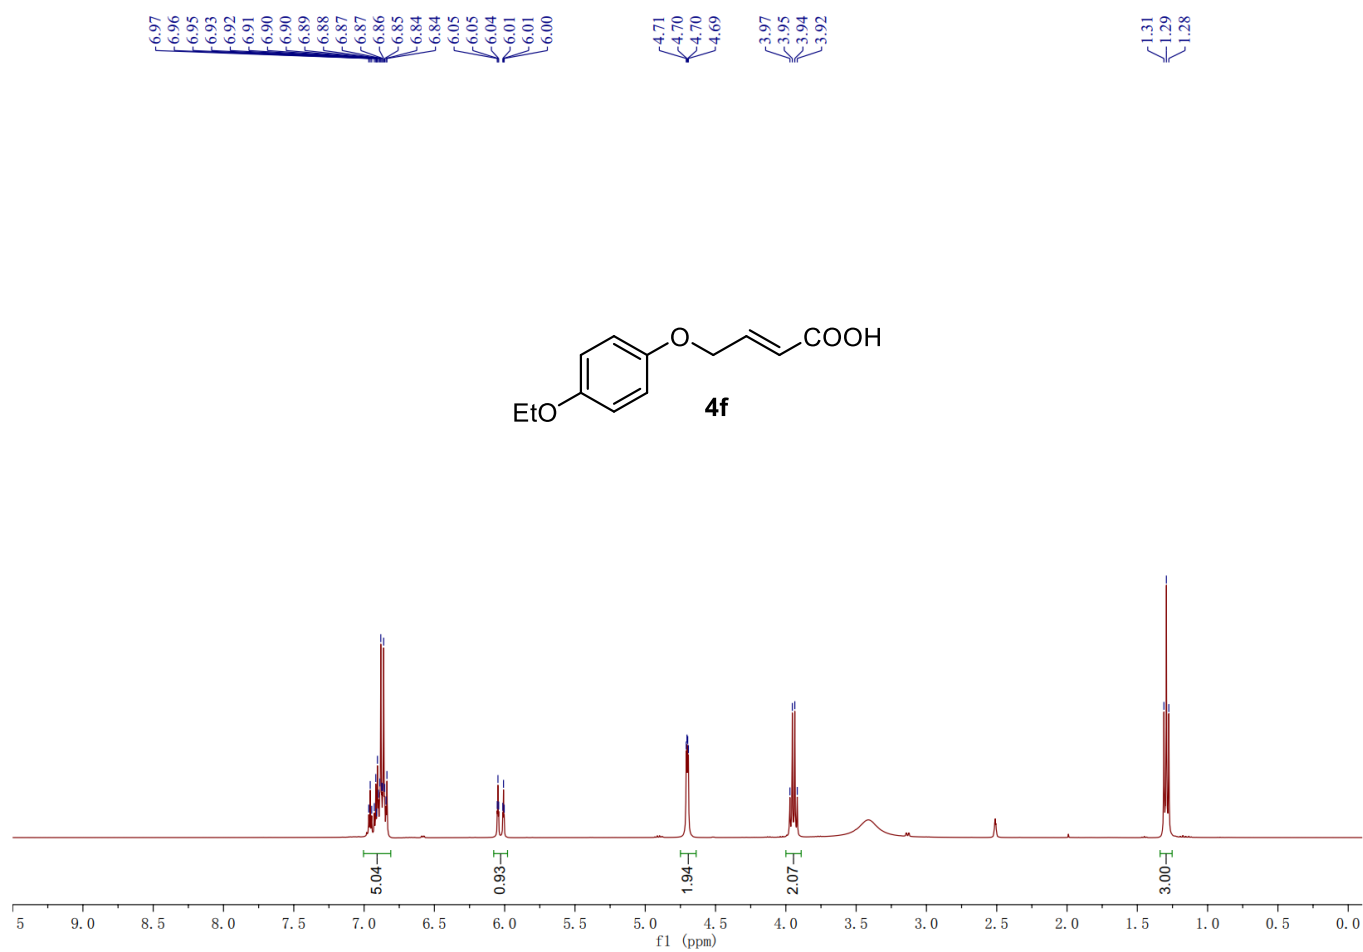

7.47  
7.47  
7.45  
7.45  
7.20  
7.19  
7.19  
7.18  
7.17  
6.98  
6.97  
6.96  
6.94  
6.93  
6.92  
6.10  
6.10  
6.09  
6.06  
6.06  
6.05  
4.87  
4.86  
4.85

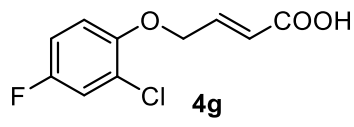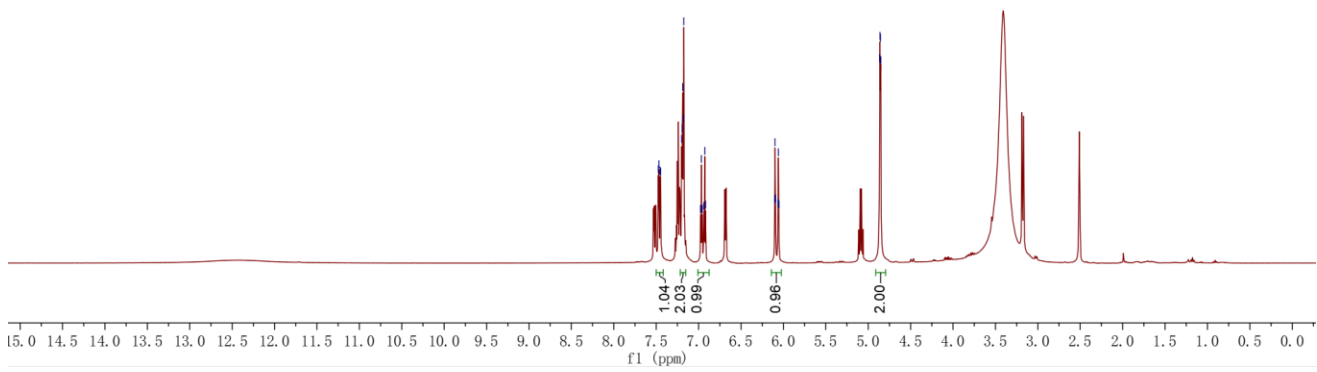

8.05  
8.05  
7.86  
7.85  
7.84  
7.33  
7.31  
6.92  
6.91  
6.91  
6.90  
6.10  
6.10  
6.09  
6.06  
6.05  
5.00  
4.99  
4.99

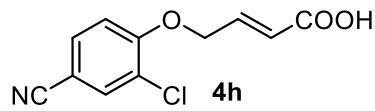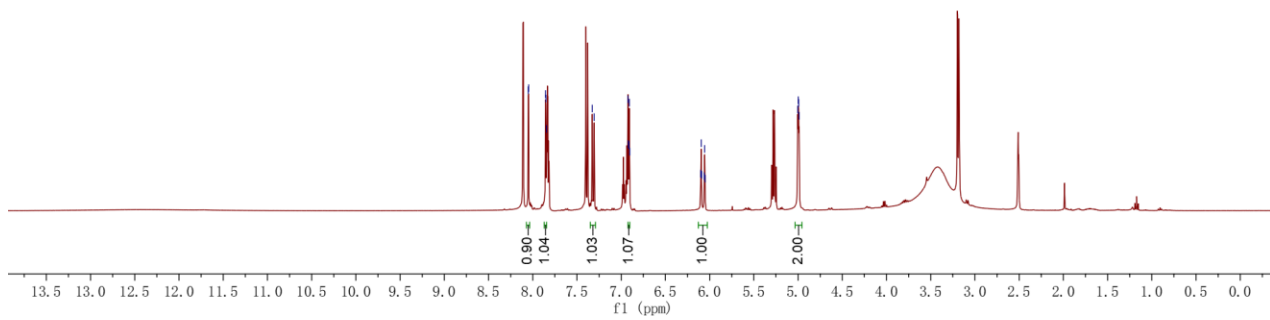

7.20  
7.17  
7.15  
6.94  
6.93  
6.92  
6.90  
6.89  
6.88  
6.83  
6.82  
6.80  
6.79  
6.74  
6.73  
6.72  
6.71  
6.03  
6.02  
5.99  
5.98  
4.76  
4.75  
4.75

2.14  
2.14

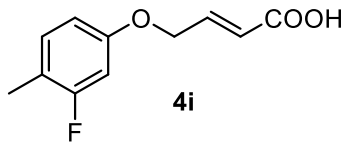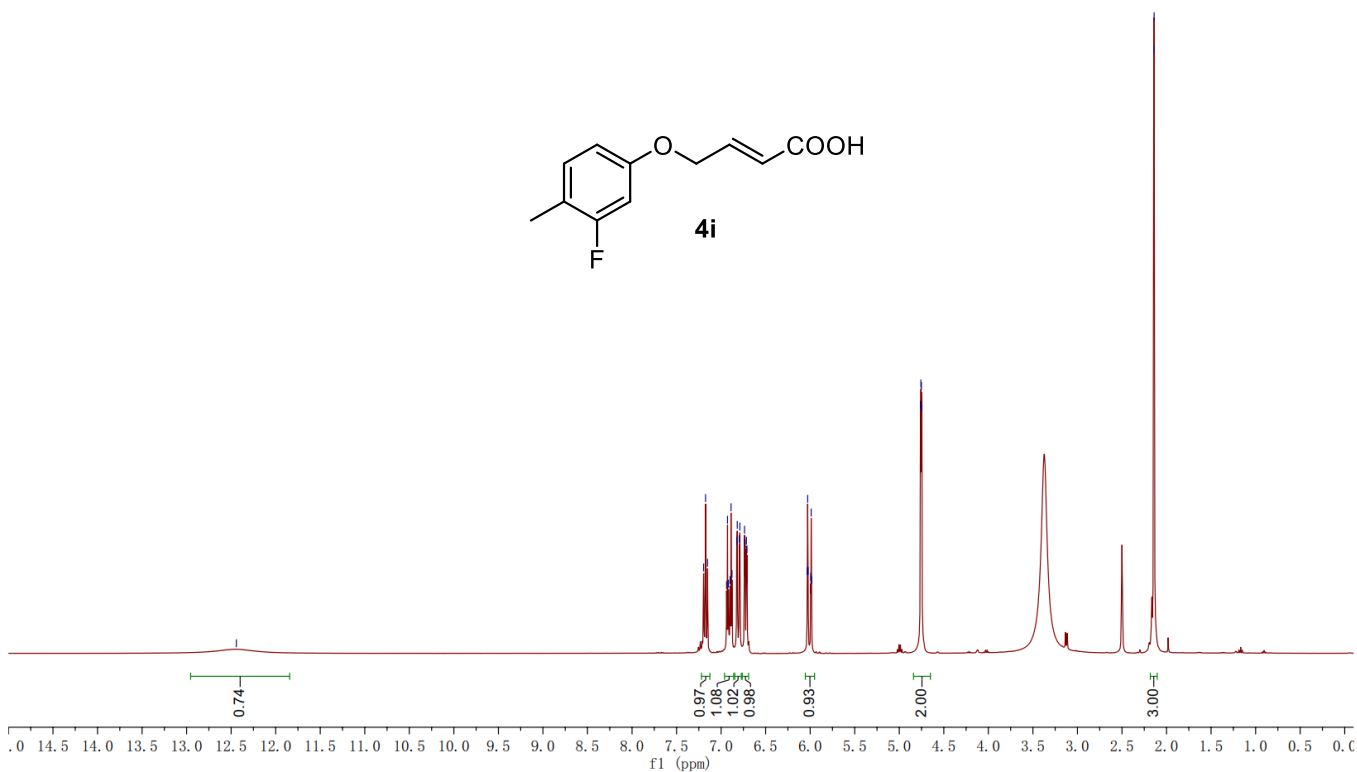

8.05  
8.05  
7.86  
7.85  
7.84  
7.33  
7.31  
6.92  
6.91  
6.91  
6.90  
6.10  
6.10  
6.09  
6.06  
6.06  
6.05  
5.00  
4.99  
4.99

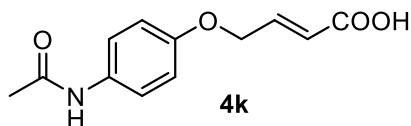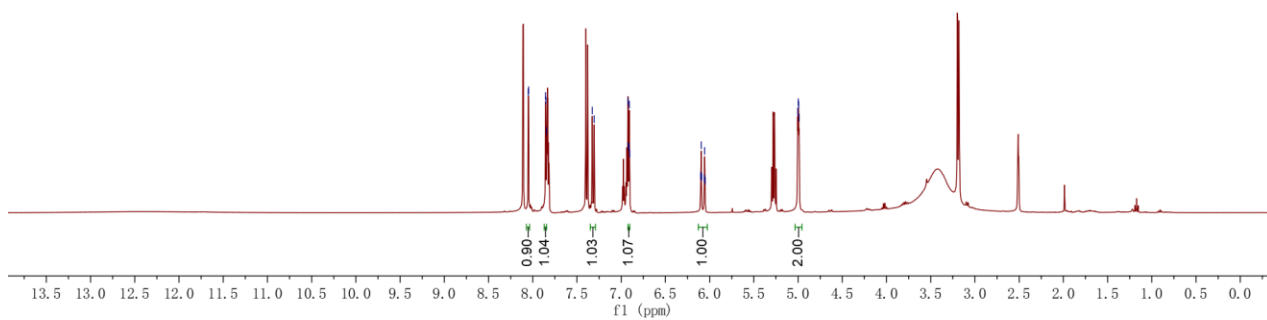

7.92  
7.90  
7.89  
7.08  
7.05  
6.98  
6.97  
6.96  
6.94  
6.93  
6.92  
6.06  
6.05  
6.05  
6.02  
6.01  
6.01  
4.88  
4.87  
4.86

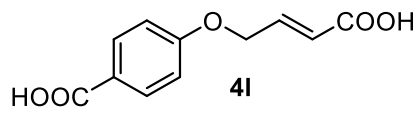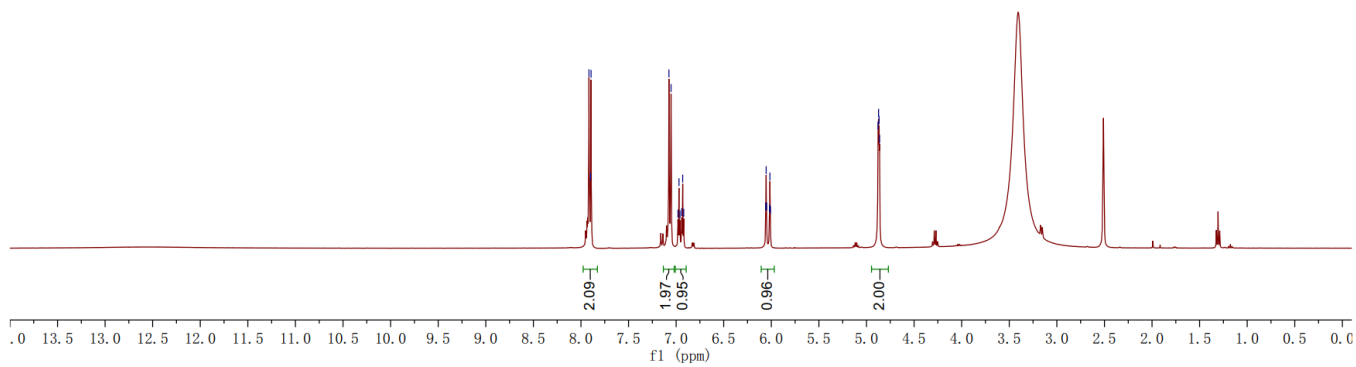

7.71  
7.69  
7.63  
7.61  
7.59  
7.55  
7.43  
7.41  
7.39  
7.35  
7.31  
7.29  
7.27  
6.46  
6.42

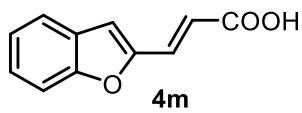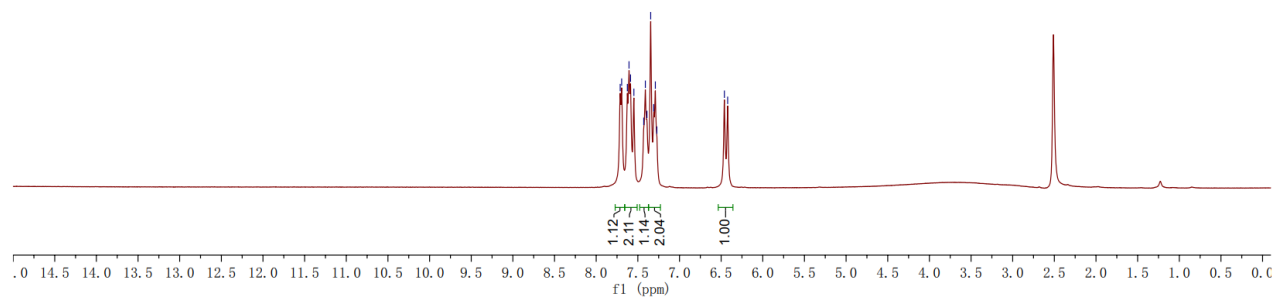

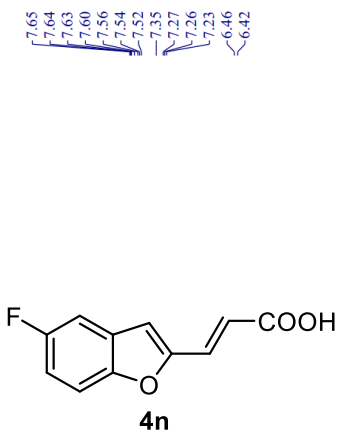

7.65  
7.64  
7.63  
7.60  
7.56  
7.54  
7.52  
7.35  
7.27  
7.26  
7.23  
6.46  
6.42

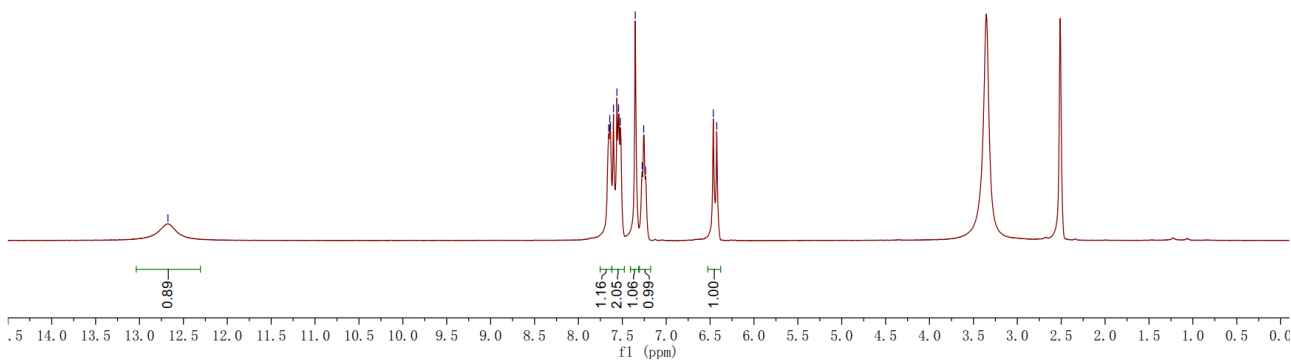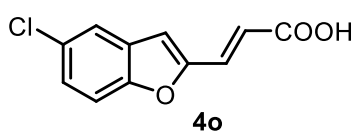

7.80  
7.80  
7.67  
7.65  
7.61  
7.57  
7.44  
7.43  
7.42  
7.41  
7.34  
6.47  
6.43

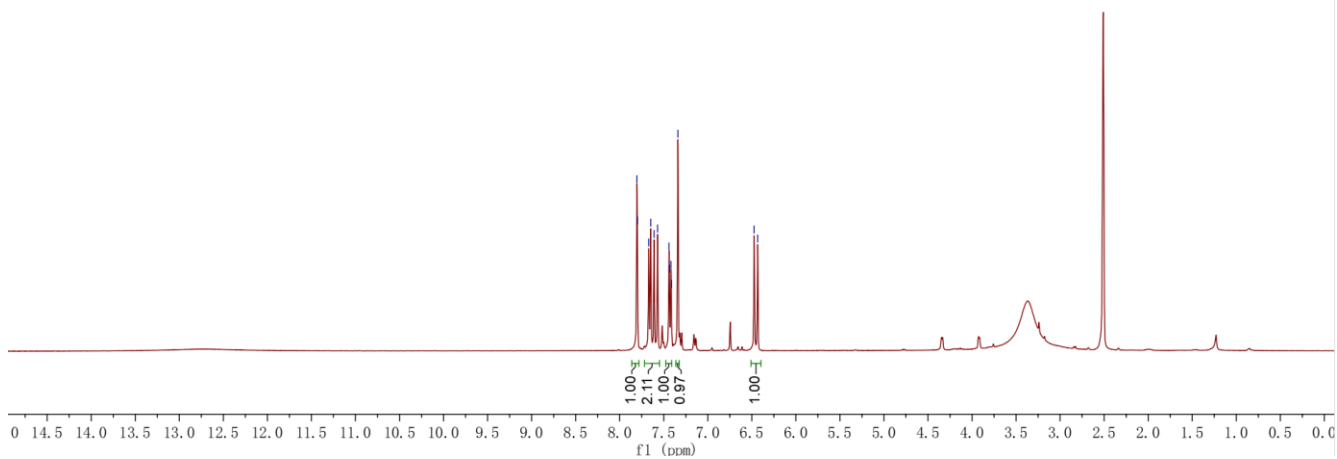

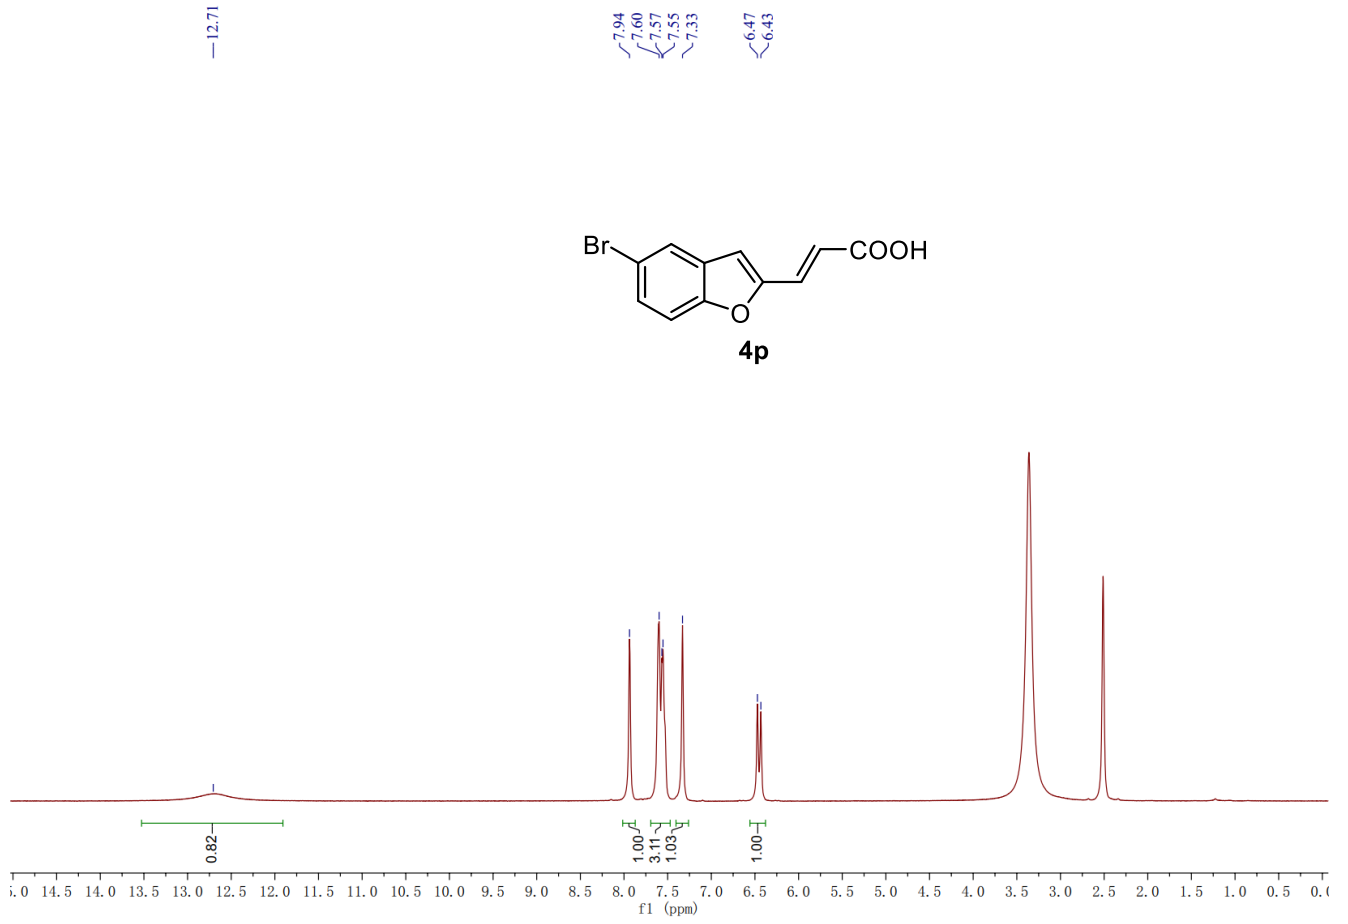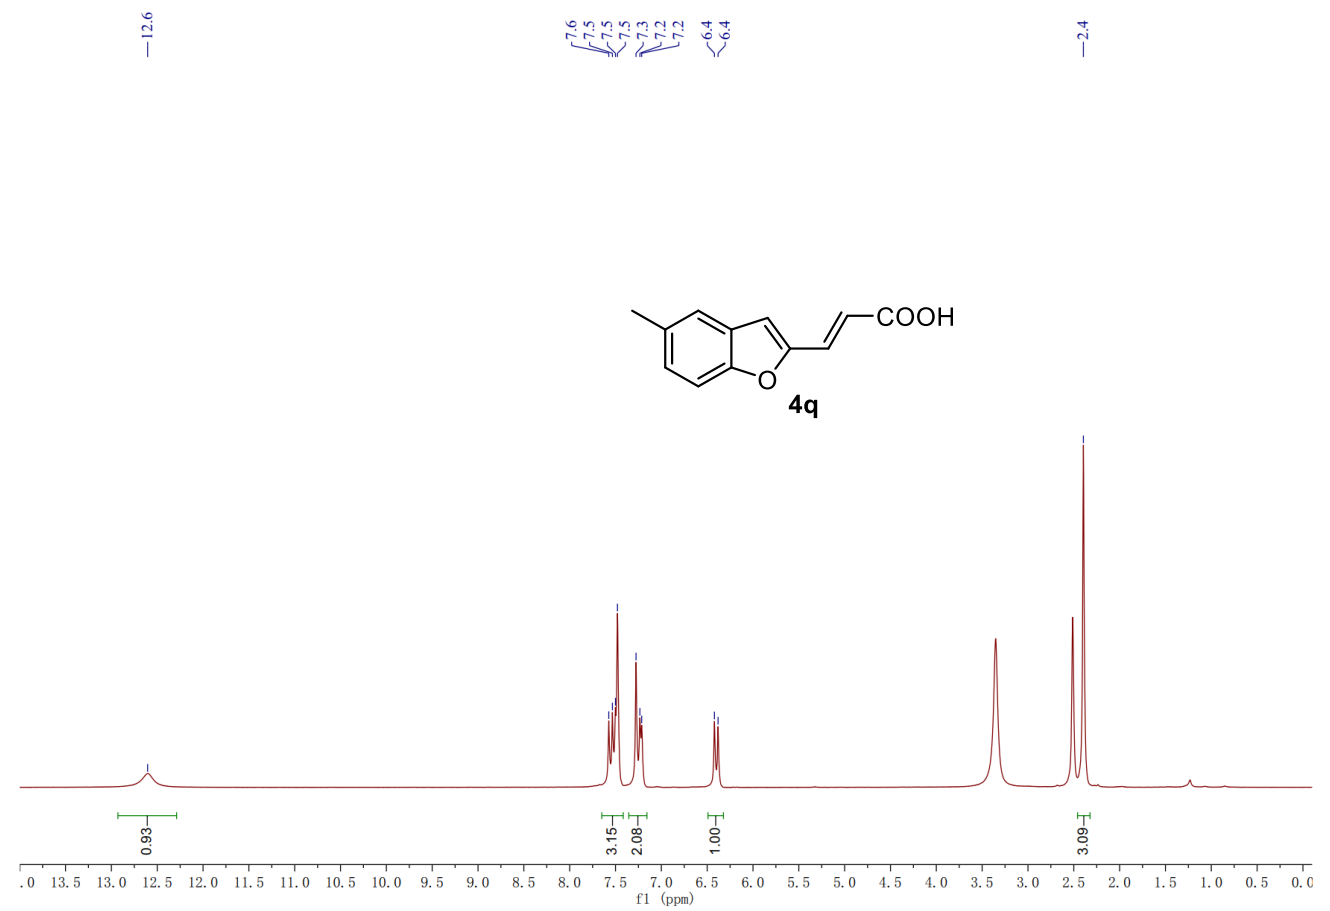

7.67  
7.63  
7.31  
7.30  
7.27  
6.97  
6.95

5.99

4.80

2.58

2.25

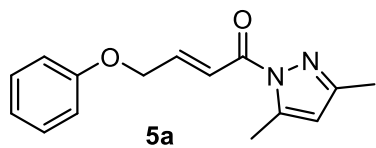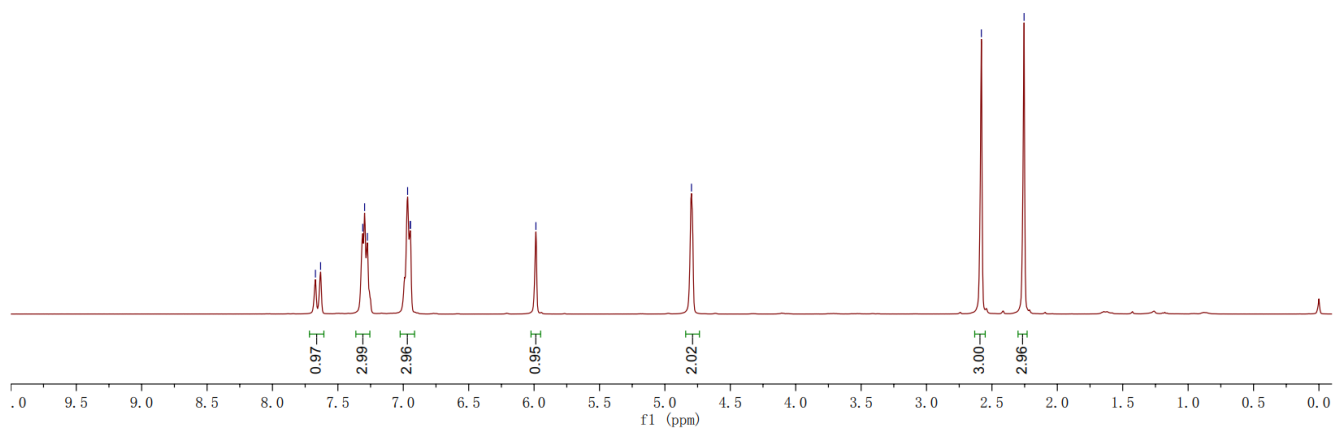

164.7

158.3

152.1

144.4

144.2

129.5

122.1

121.3

114.9

111.6

67.1

14.5

13.8

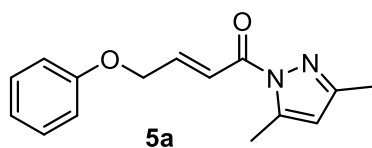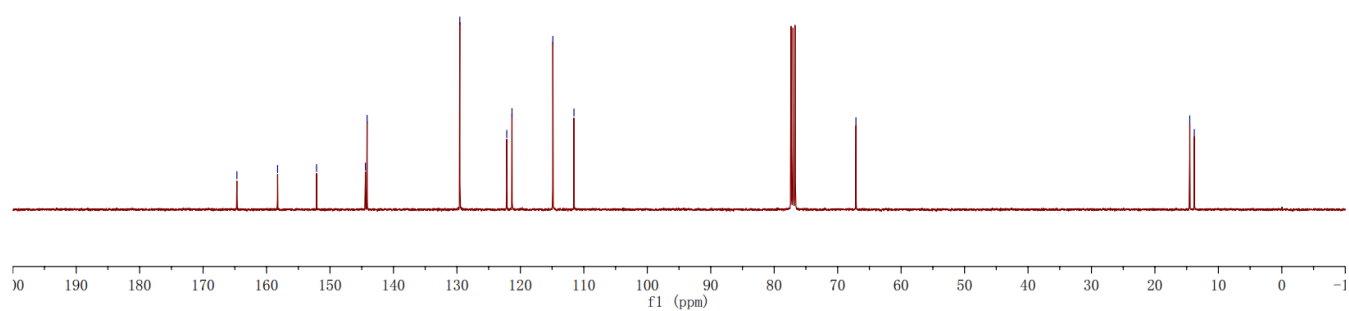

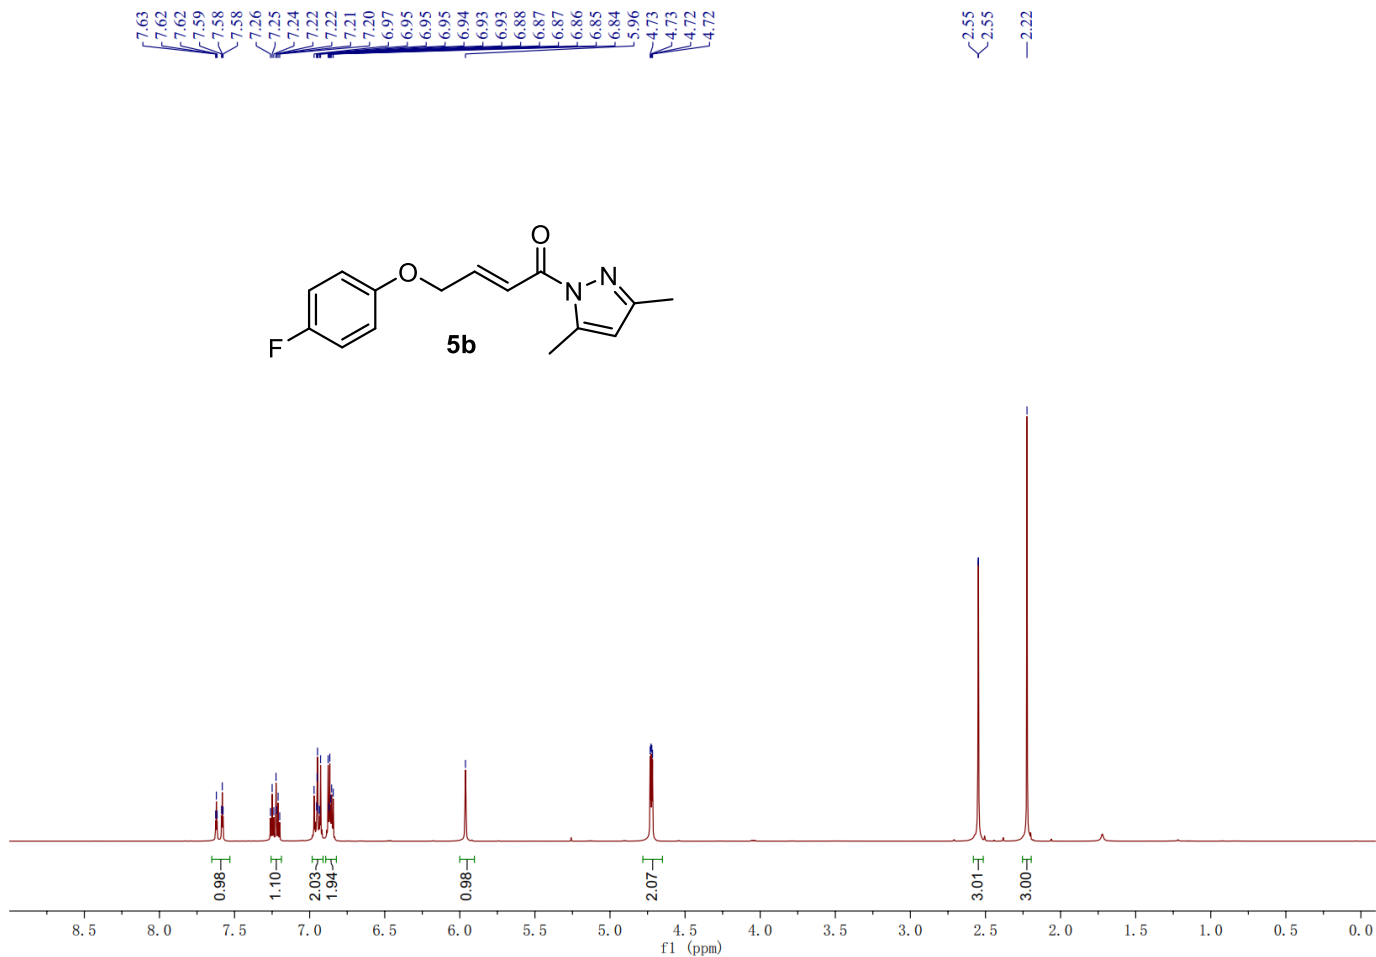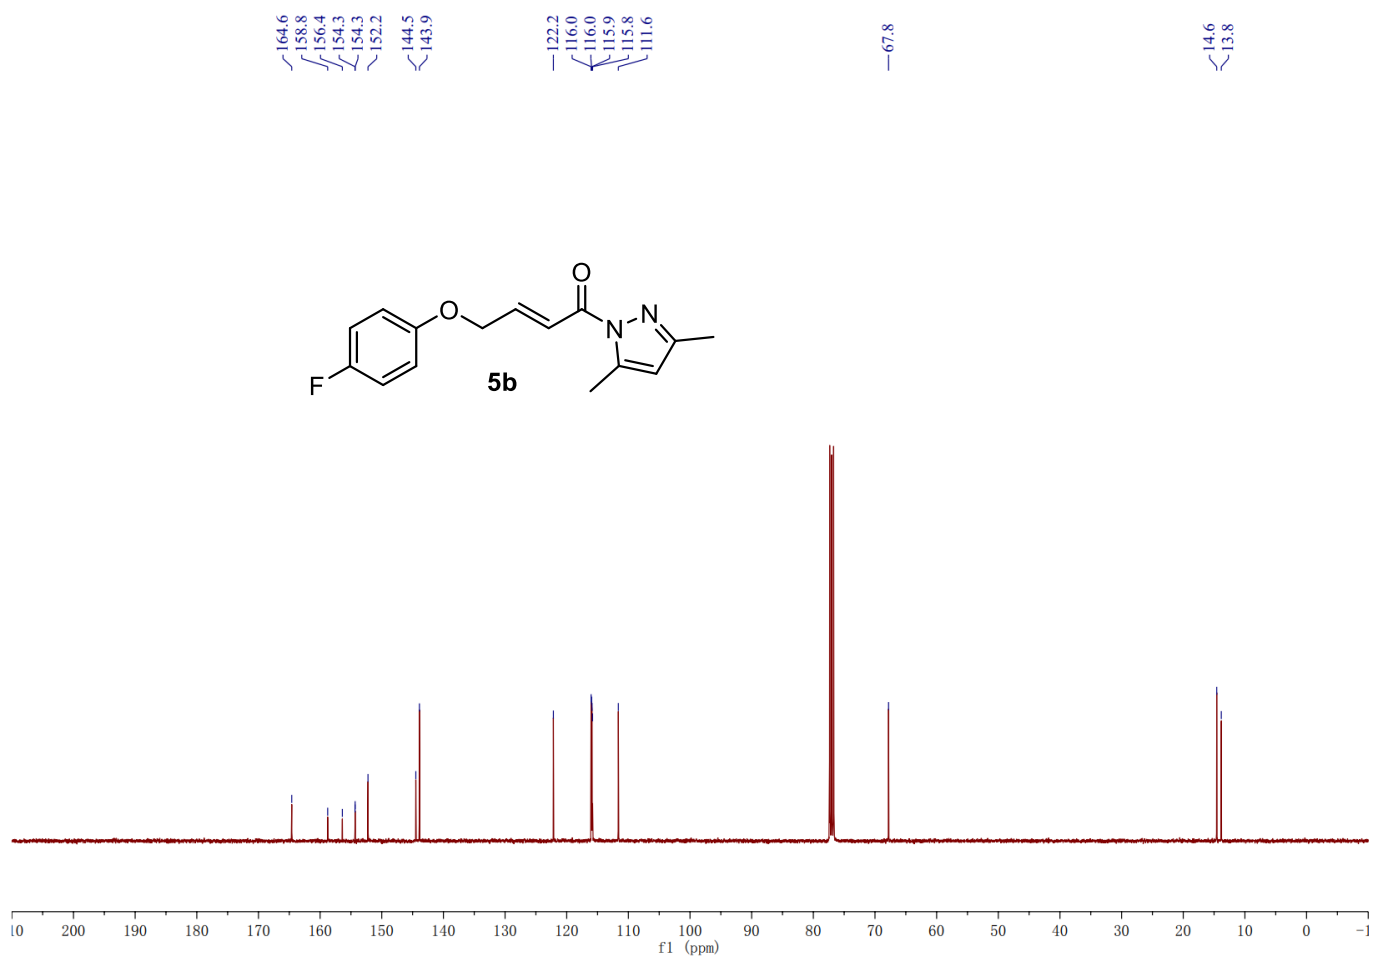

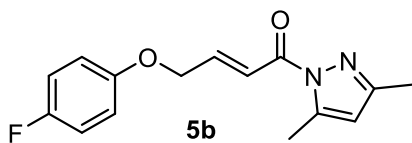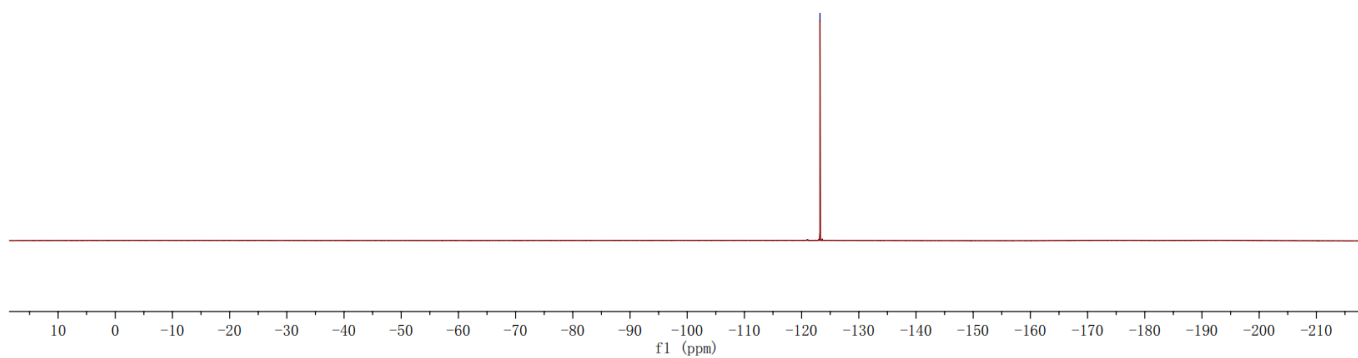

7.67  
7.67  
7.66  
7.63  
7.62  
7.33  
7.32  
7.31  
7.30  
7.25  
7.24  
7.23  
7.21  
7.20  
7.19  
7.15  
7.15  
7.13  
7.13  
7.13  
7.11  
7.11  
6.88  
6.87  
6.86  
6.86  
6.85  
6.84  
6.84  
5.92  
4.80  
4.80  
4.79  
4.79

2.51  
2.51  
2.18

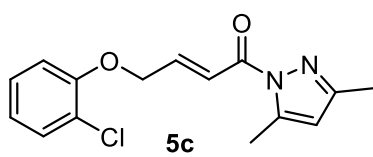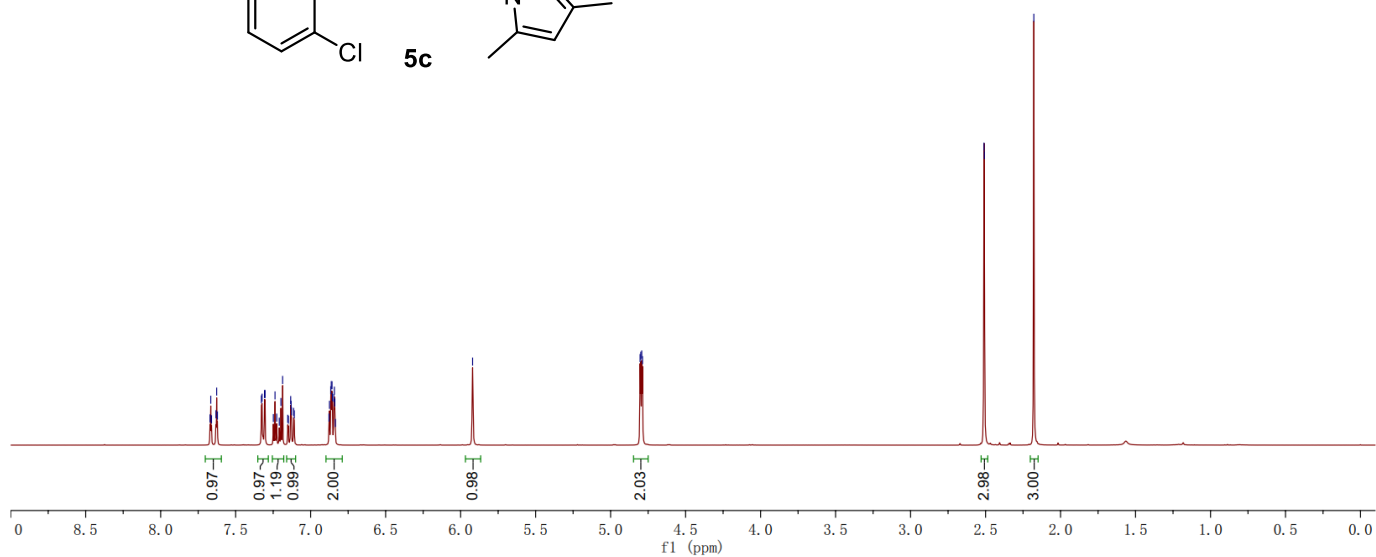

— 164.6  
 < 153.8  
 < 152.2  
 < 144.4  
 < 143.3  
 < 130.5  
 < 127.7  
 < 123.4  
 < 122.7  
 < 122.1  
 < 114.0  
 < 111.6

— 68.3

< 14.6  
 < 13.9

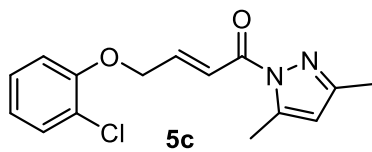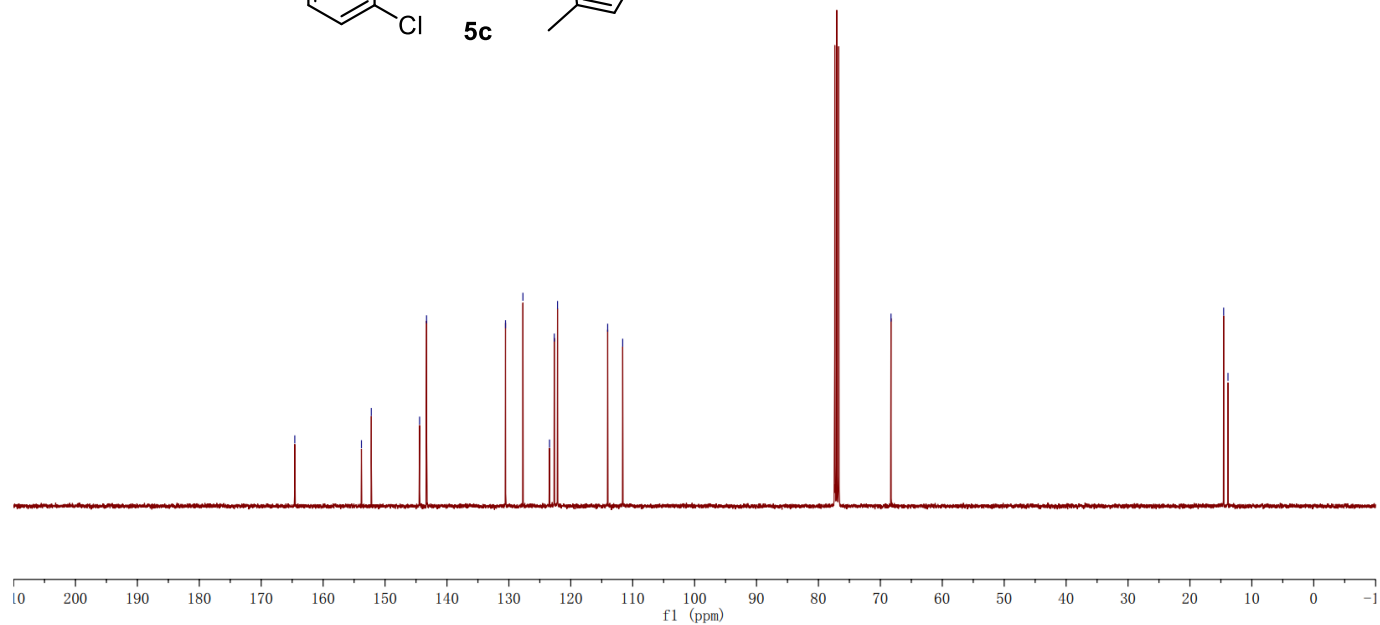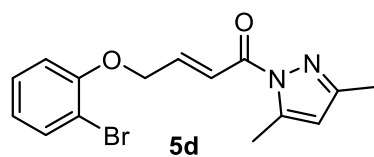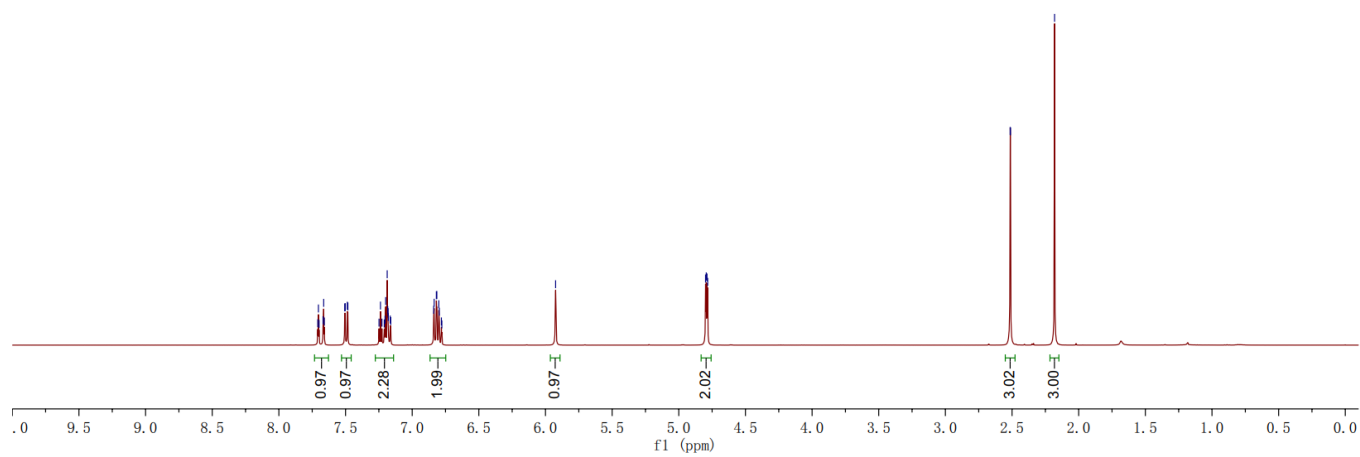

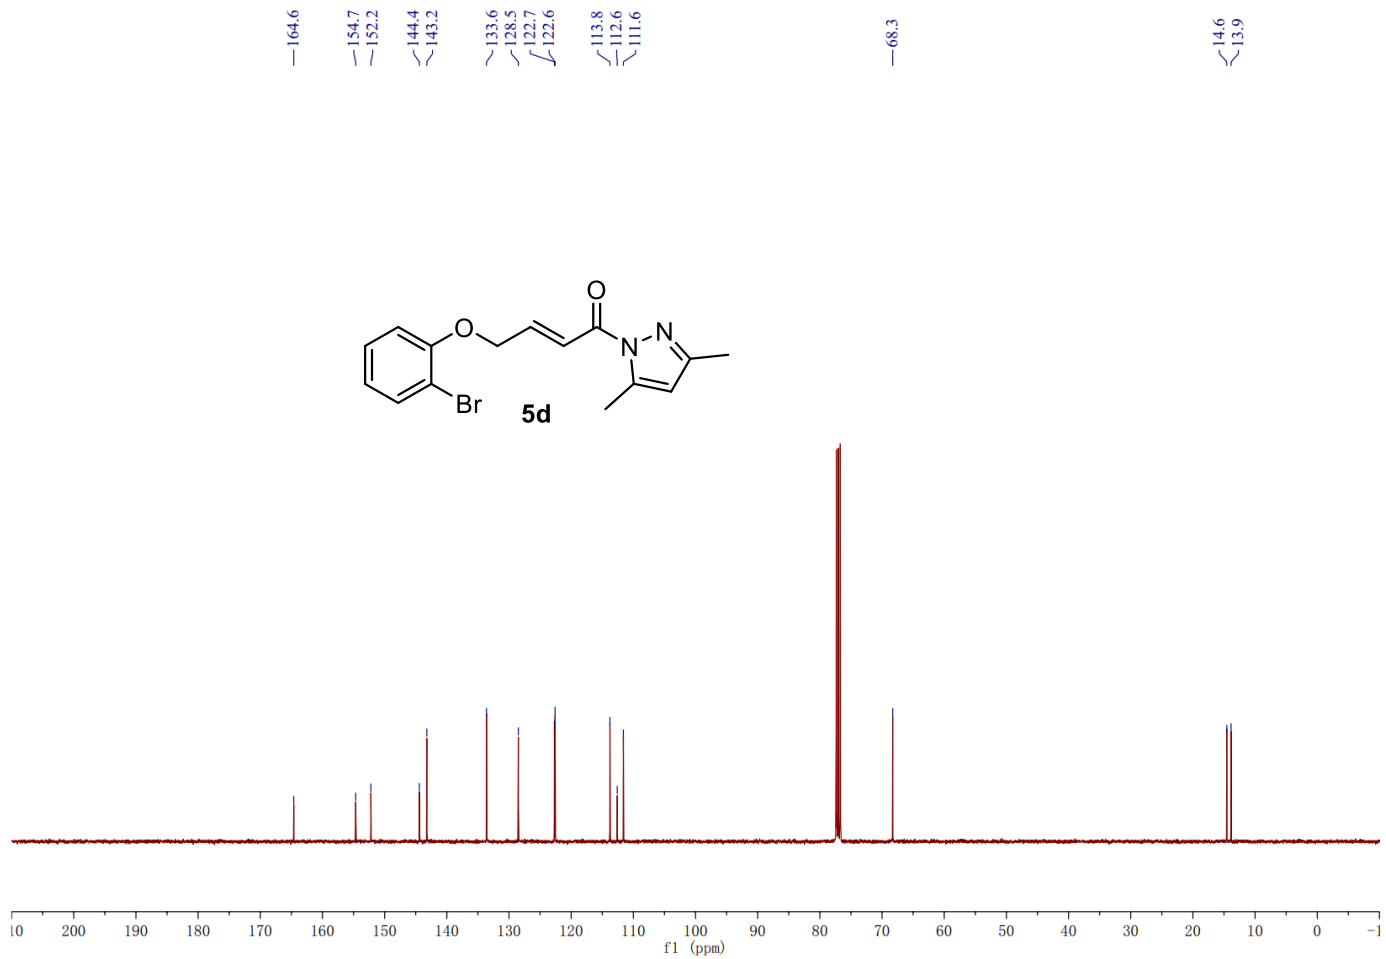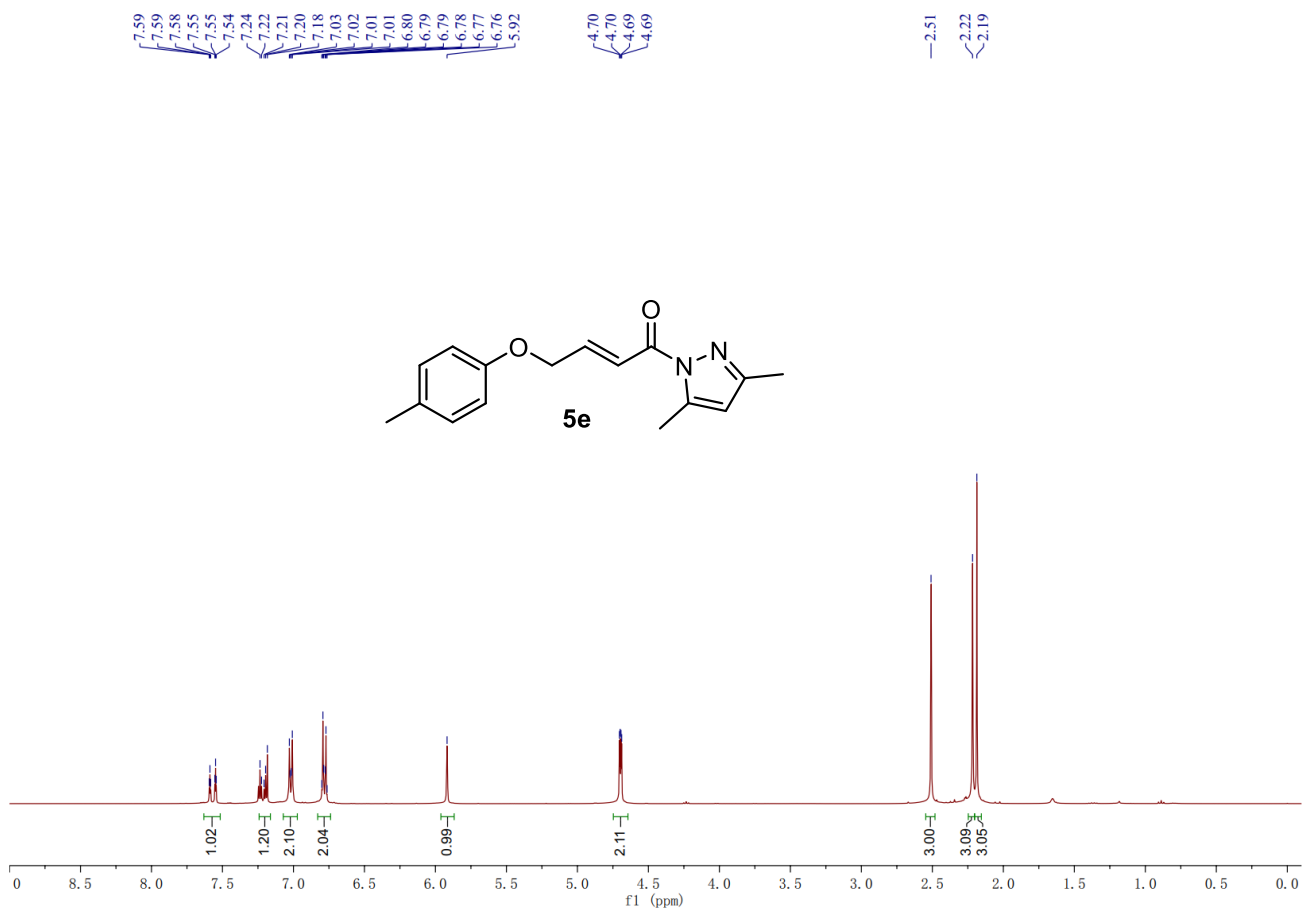

—164.7  
 —156.1  
 —152.1  
 —144.5  
 —144.4  
 —130.6  
 —130.0  
 —121.9  
 —114.7  
 —111.6  
 —67.3  
 —20.5  
 —14.6  
 —13.8

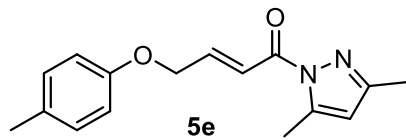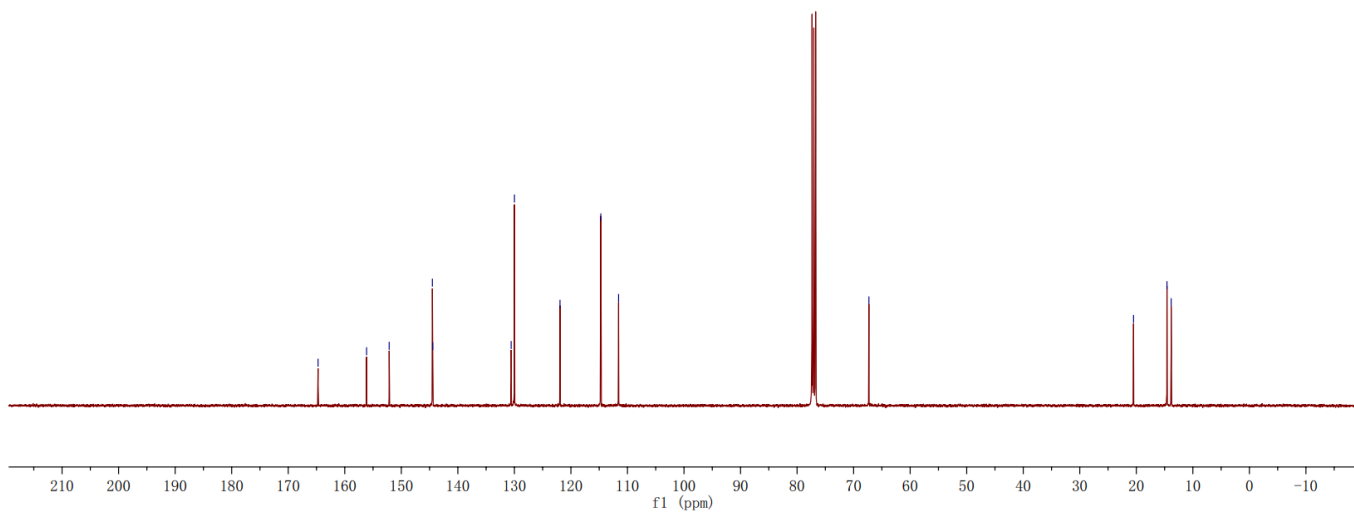

7.69, 7.68, 7.68, 7.65, 7.64, 7.64, 7.34, 7.33, 7.31, 7.30, 7.29, 7.27, 6.92, 6.91, 6.90, 6.90, 6.89, 6.87, 6.86, 6.85, 6.84, 6.01, 4.78, 4.77, 4.76, 4.76, 4.03, 4.01, 3.99, 3.98, 2.61, 2.60, 2.28, 1.43, 1.41, 1.39

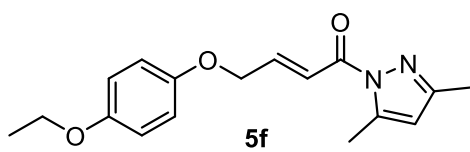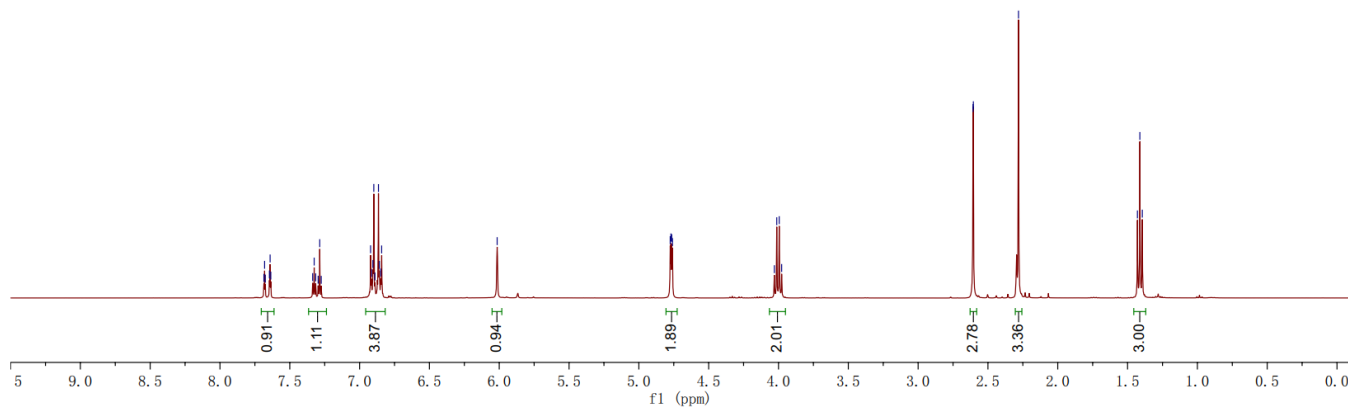

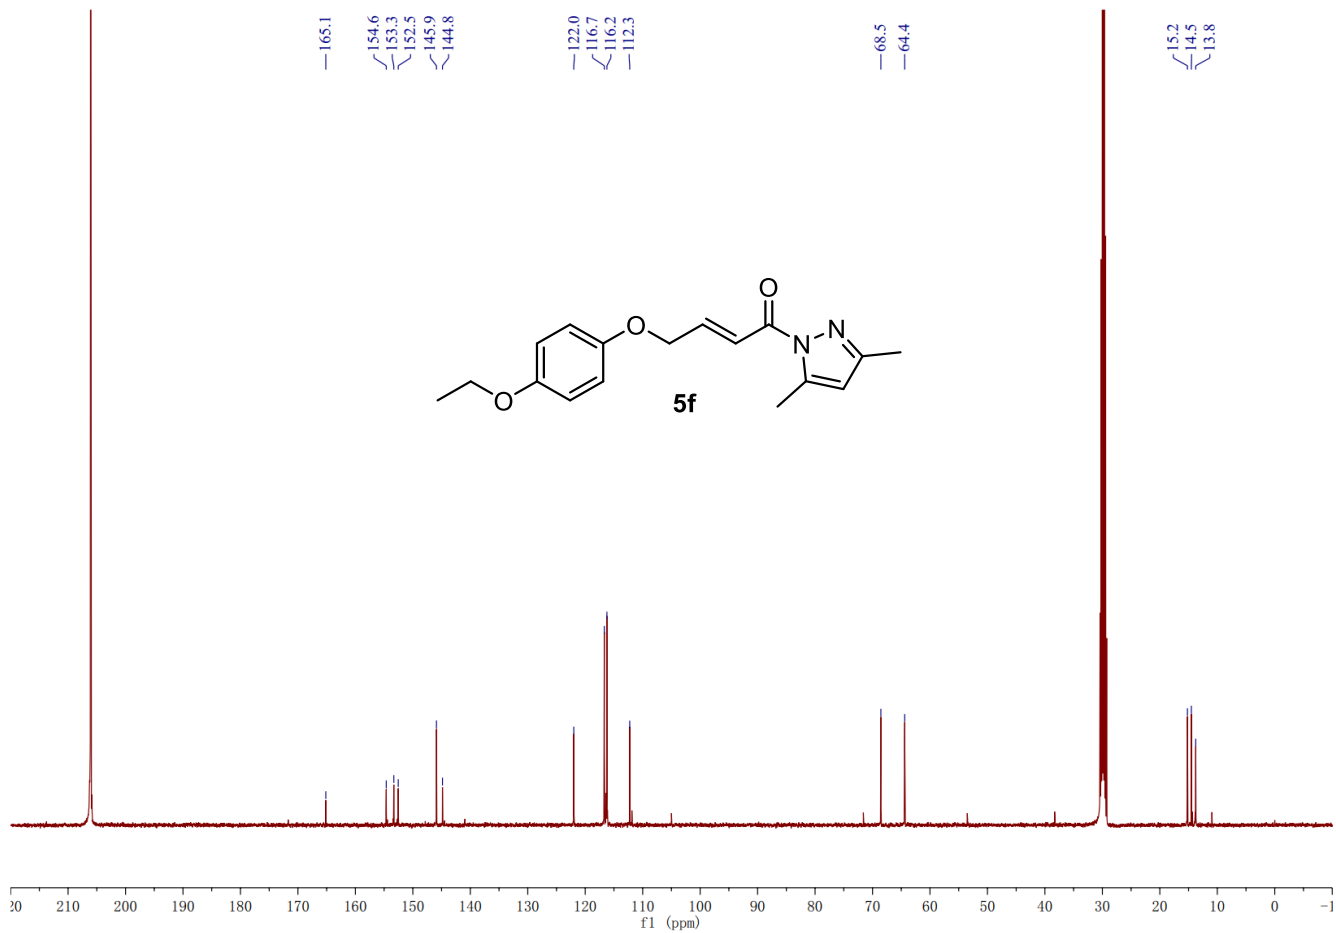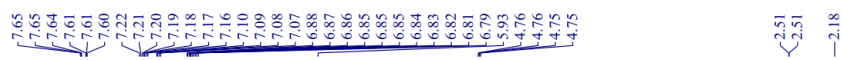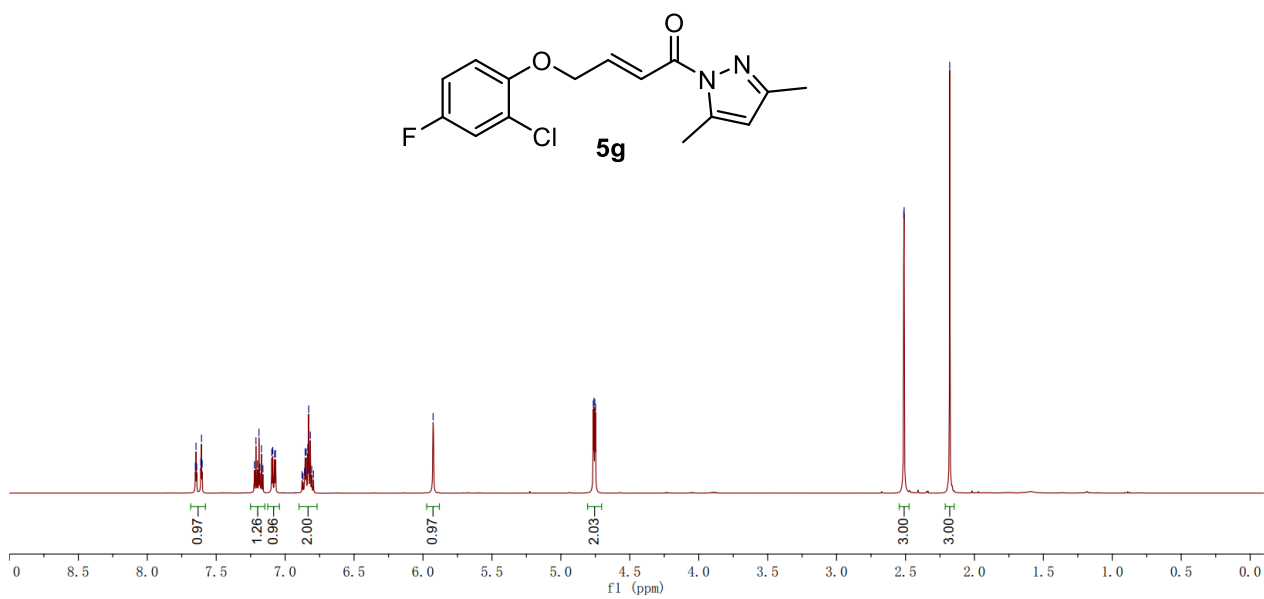

164.5  
158.2  
155.8  
152.3  
150.5  
150.4  
144.4  
143.0

124.3  
124.2  
122.7  
117.9  
117.7  
115.1  
115.1  
114.2  
114.0  
111.6

69.1

14.5  
13.8

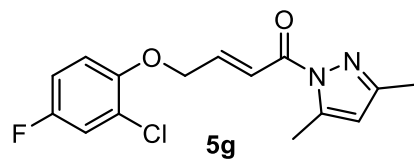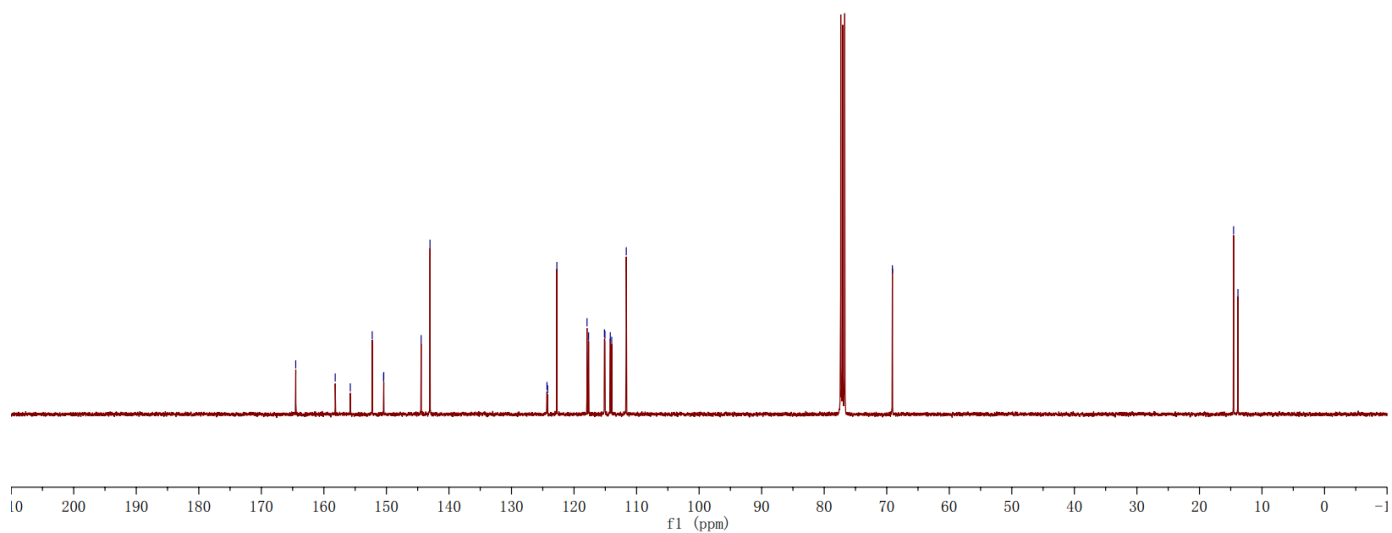

120.5

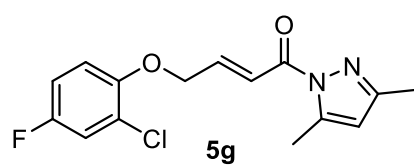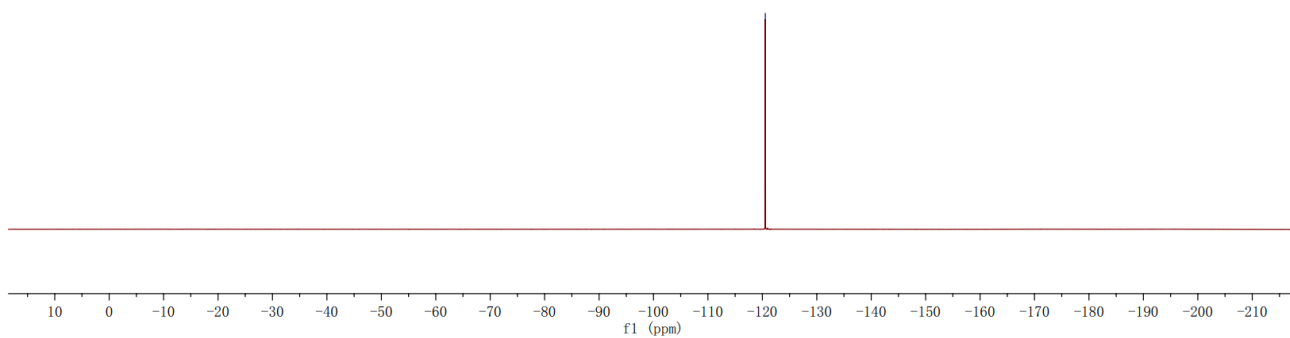

7.90  
7.77  
7.76  
7.75  
7.72  
7.72  
7.40  
7.38  
7.33  
7.31  
7.30  
7.29  
7.27  
7.26

6.15

5.18  
5.17  
5.16

2.55

2.20

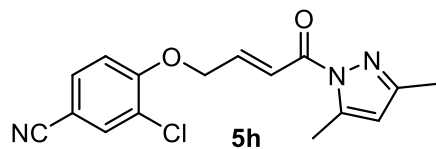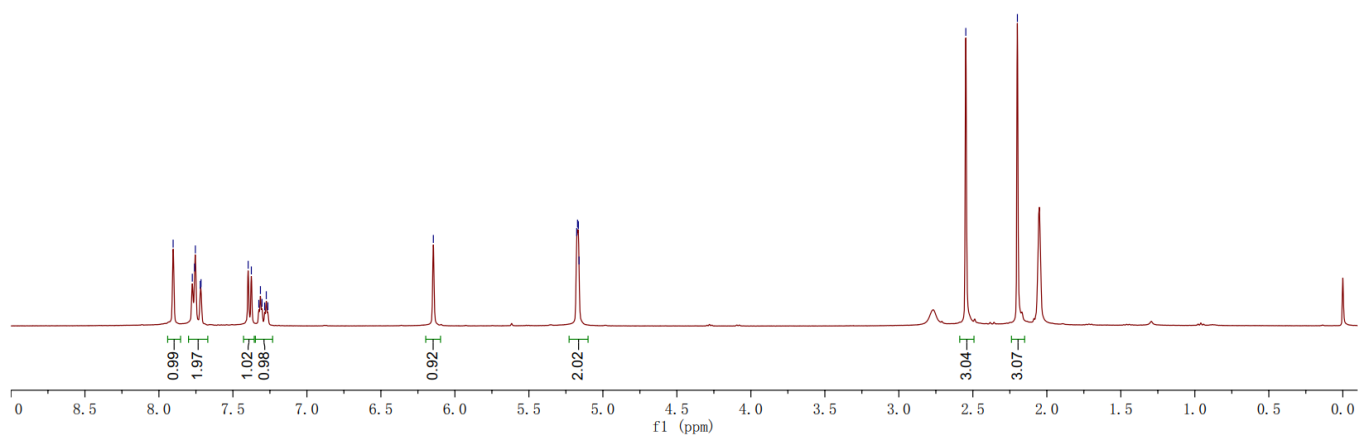

164.9

158.2

152.7

144.9

143.3

134.5

133.8

124.2

123.1

118.3

115.3

112.4

106.2

69.2

14.5

13.8

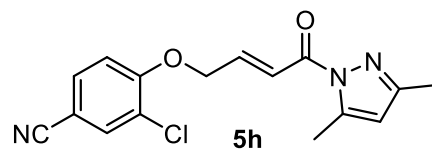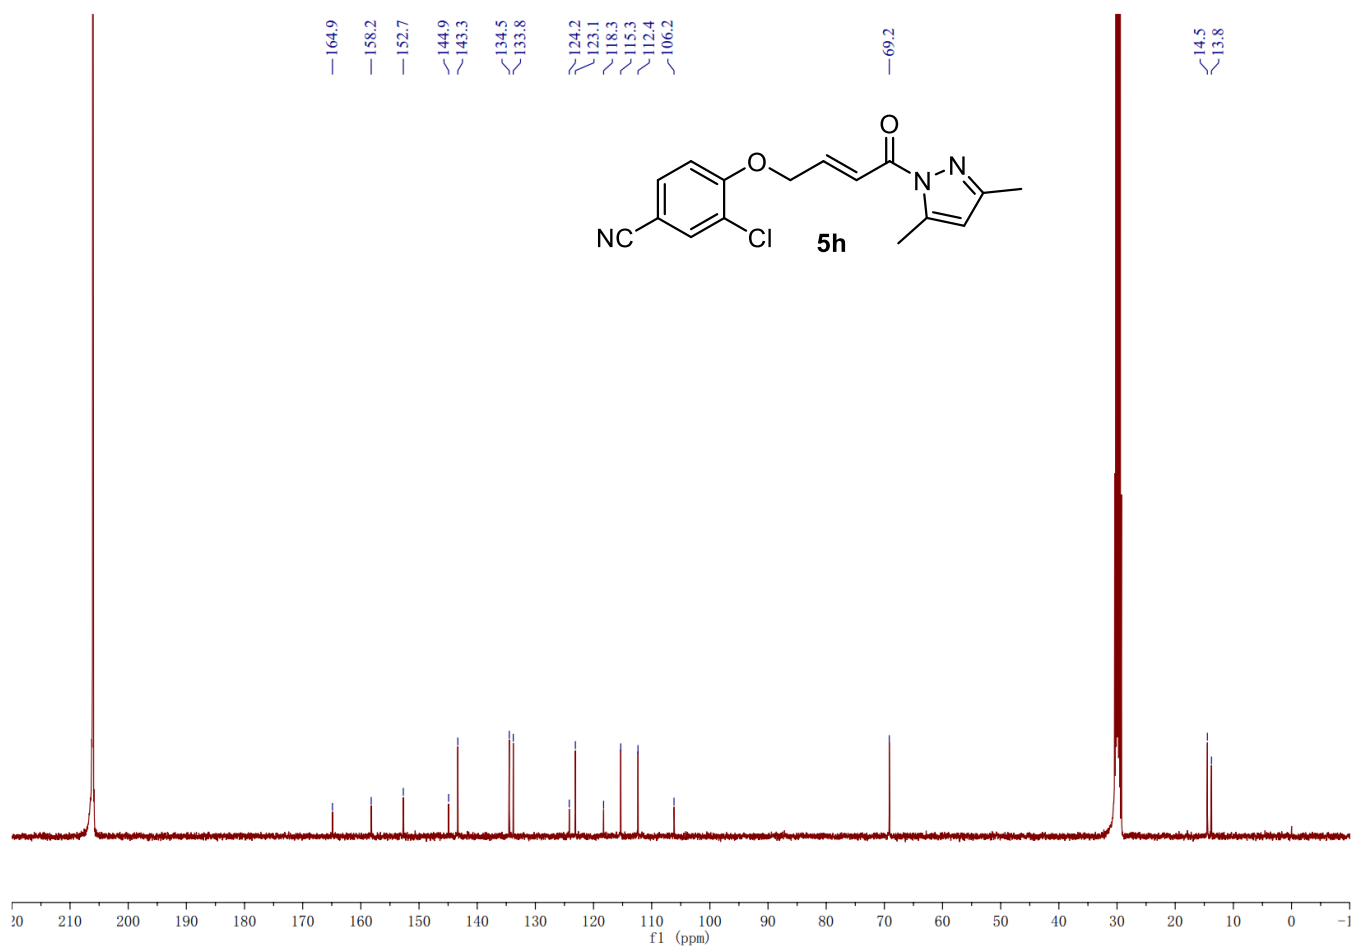

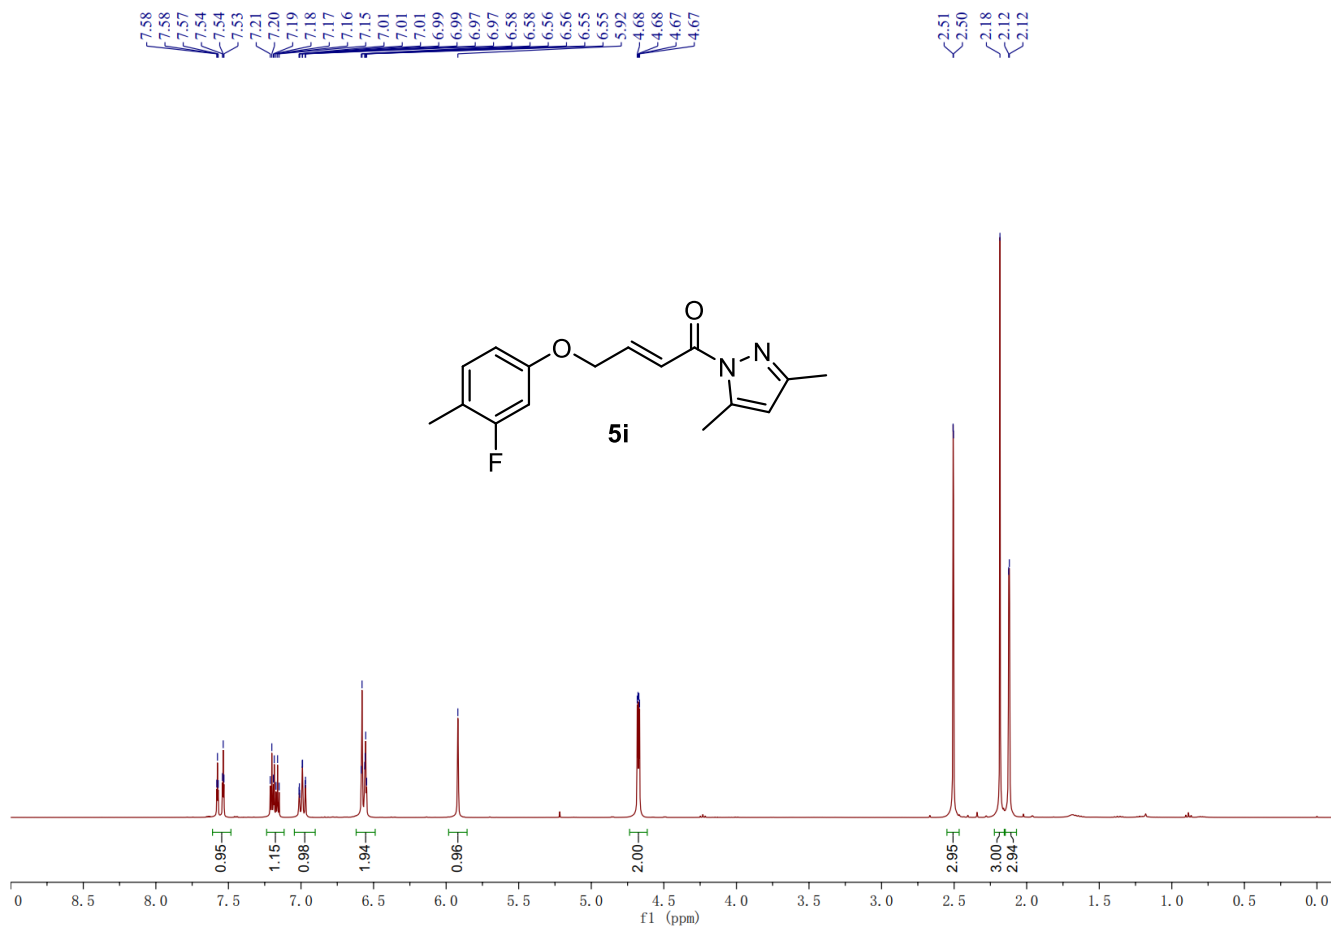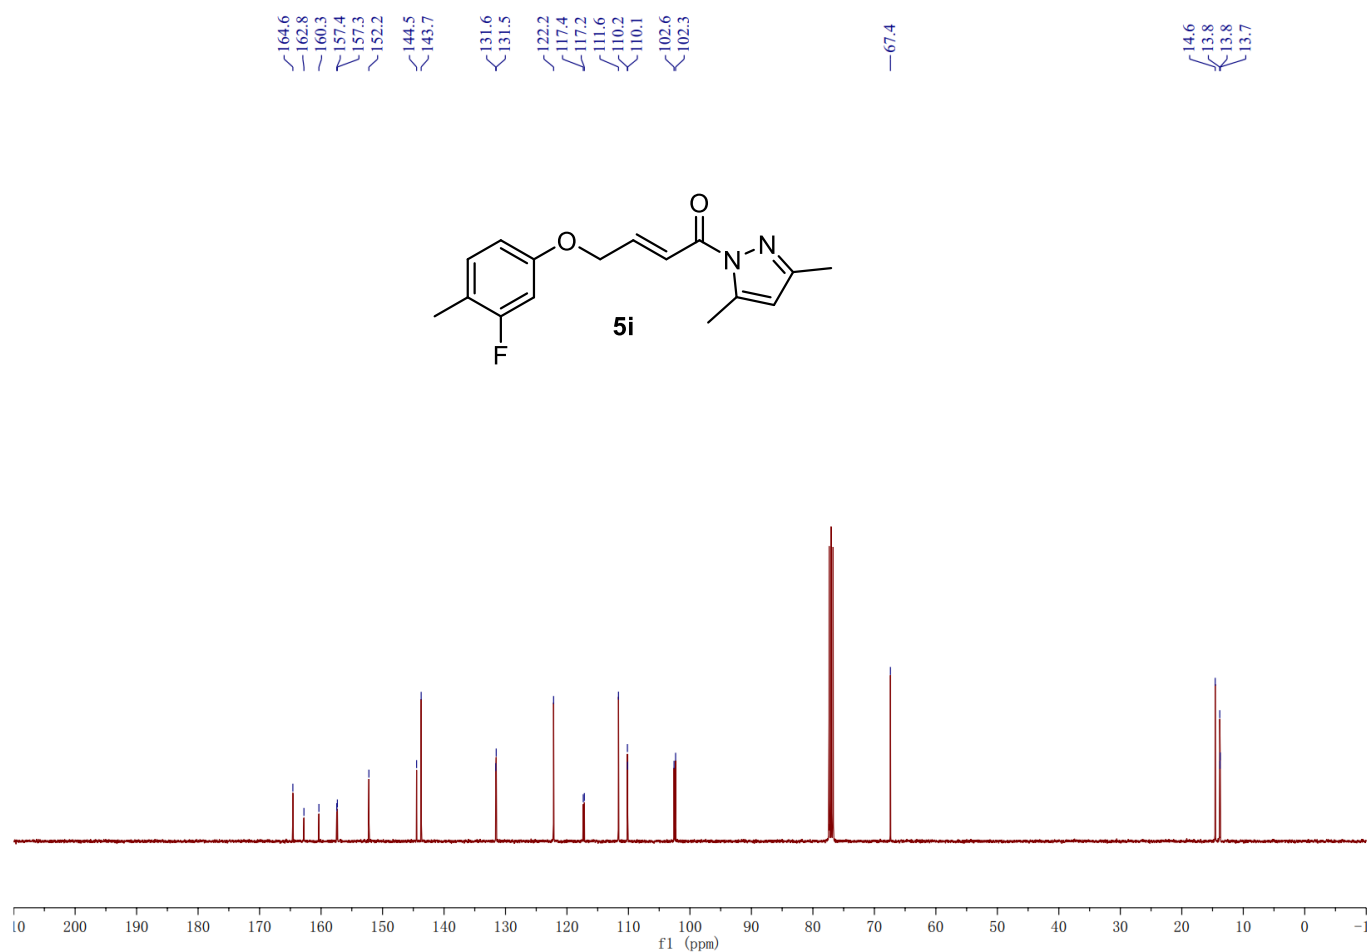

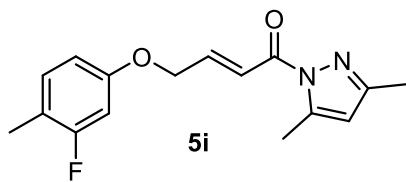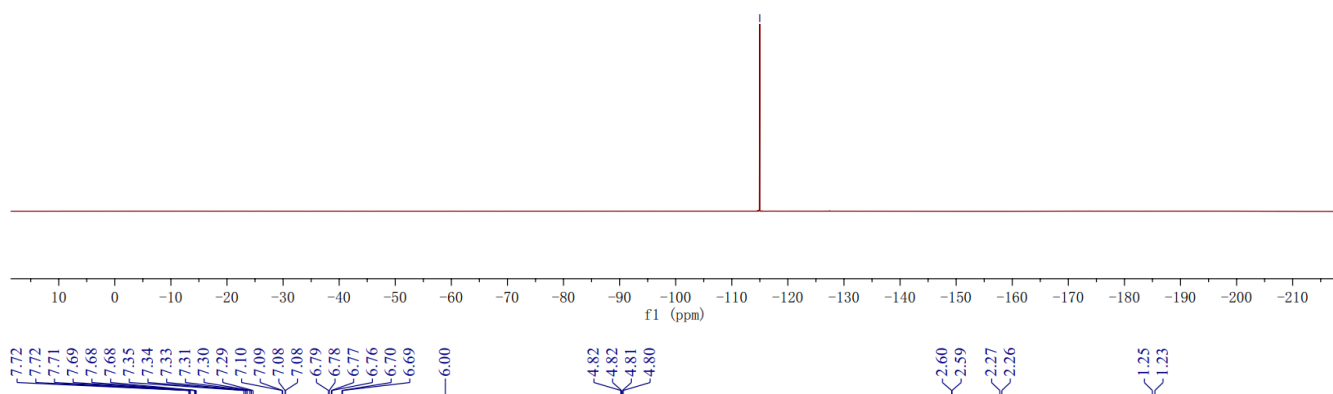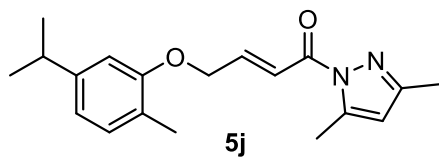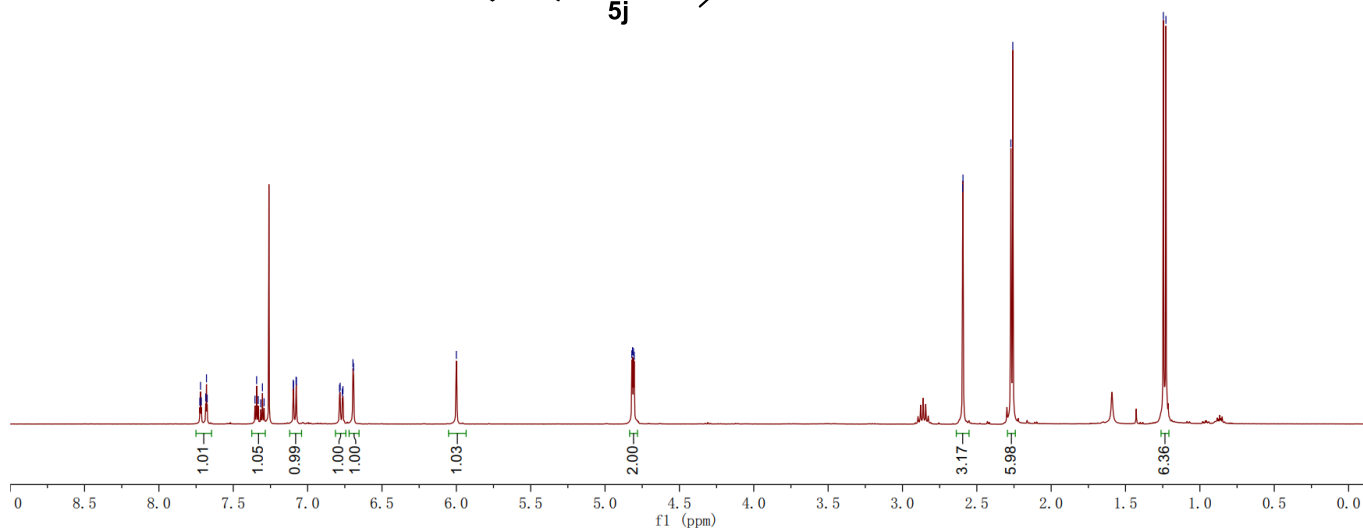

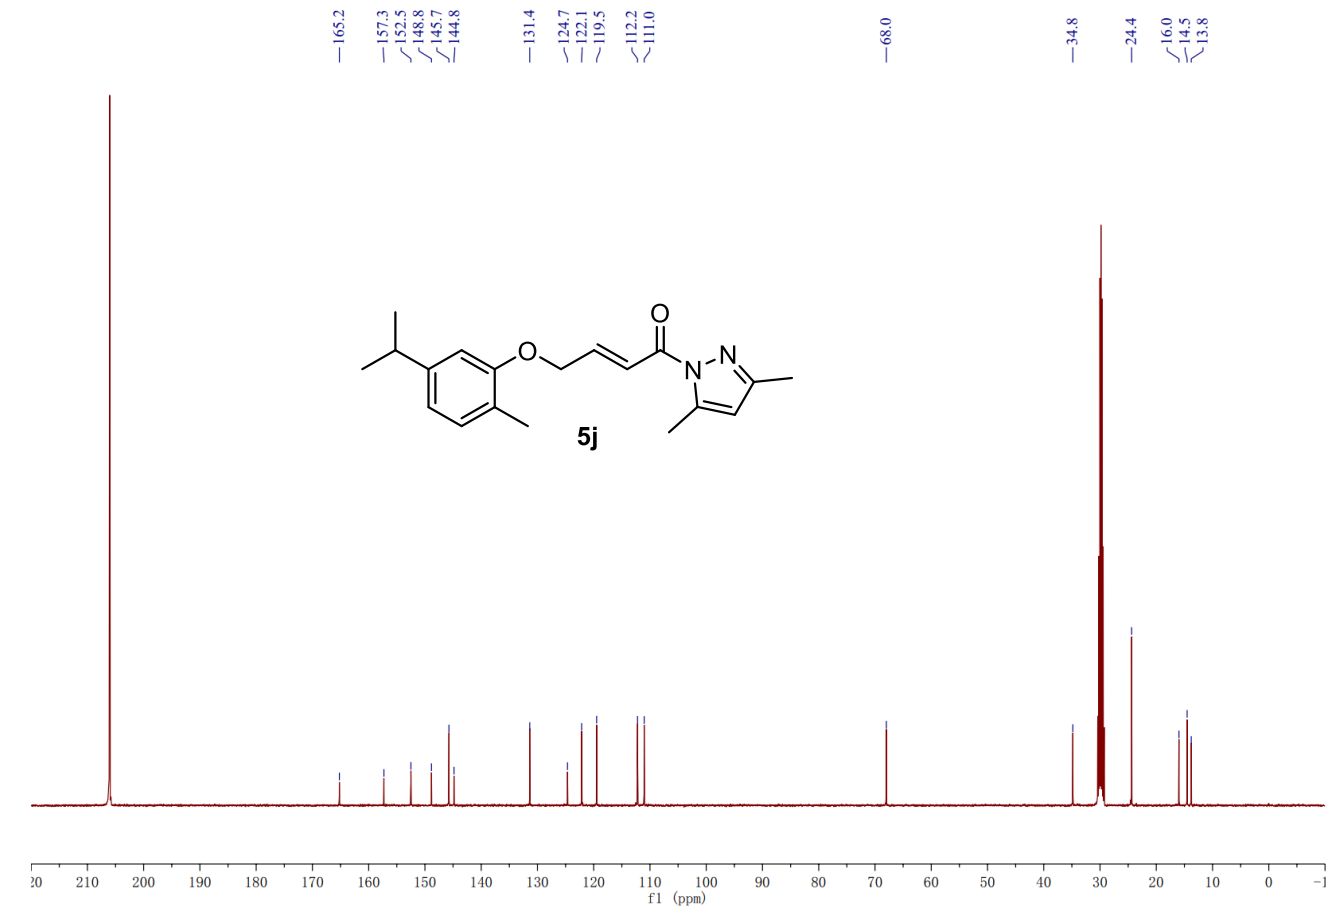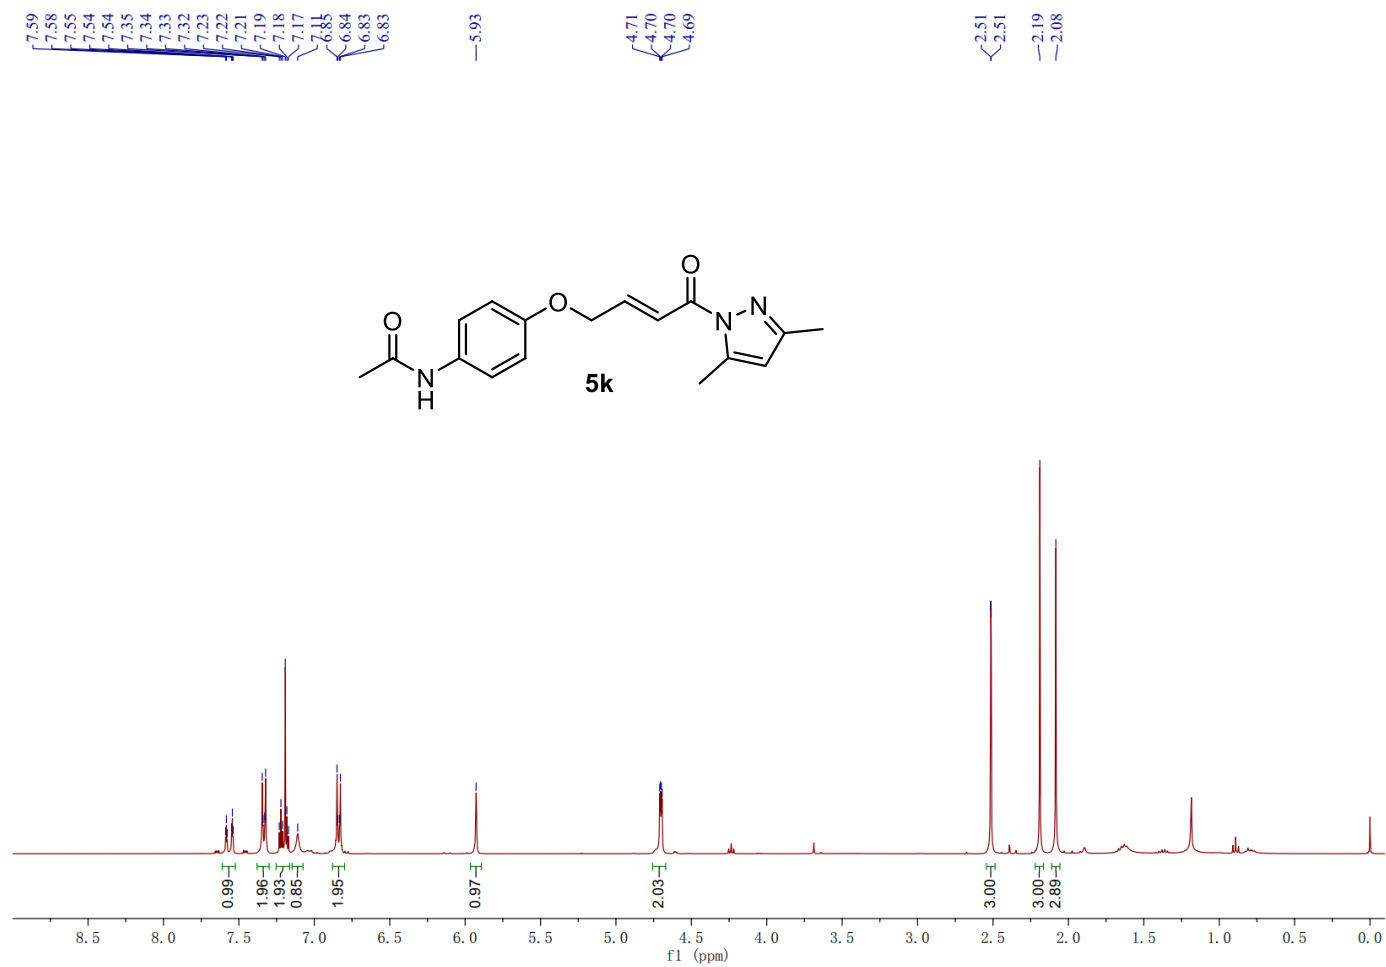

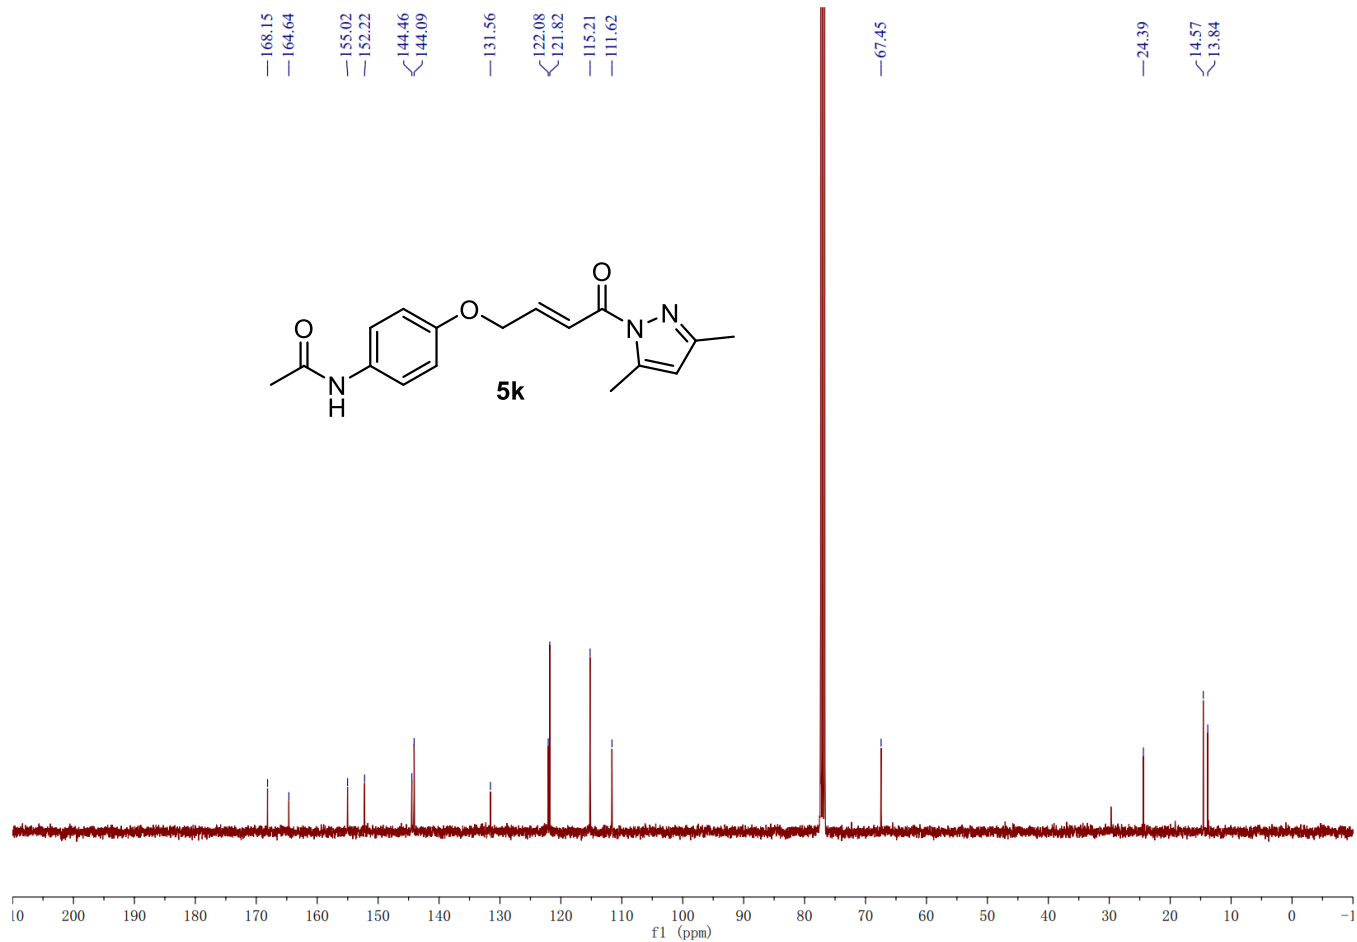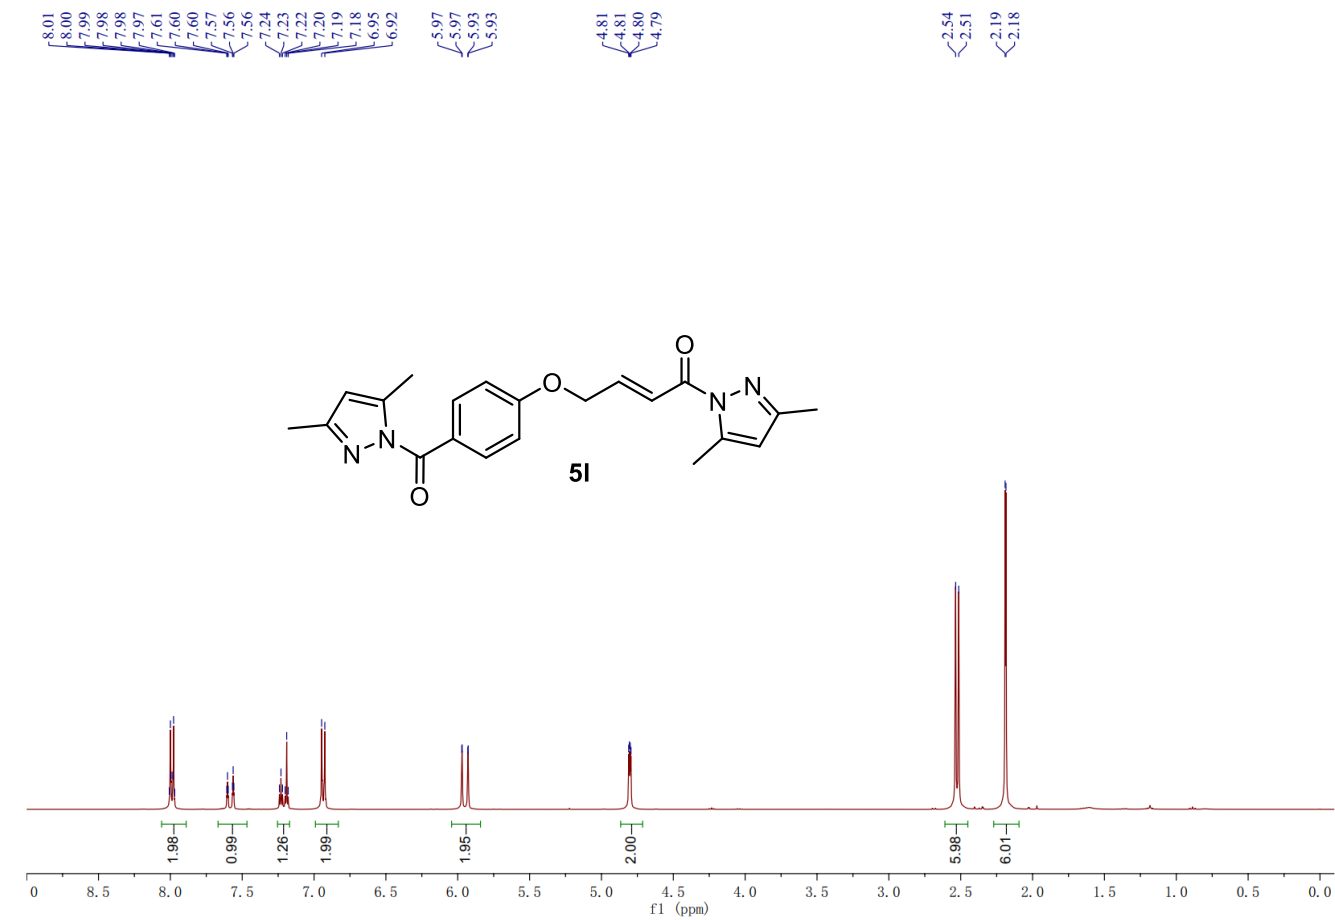

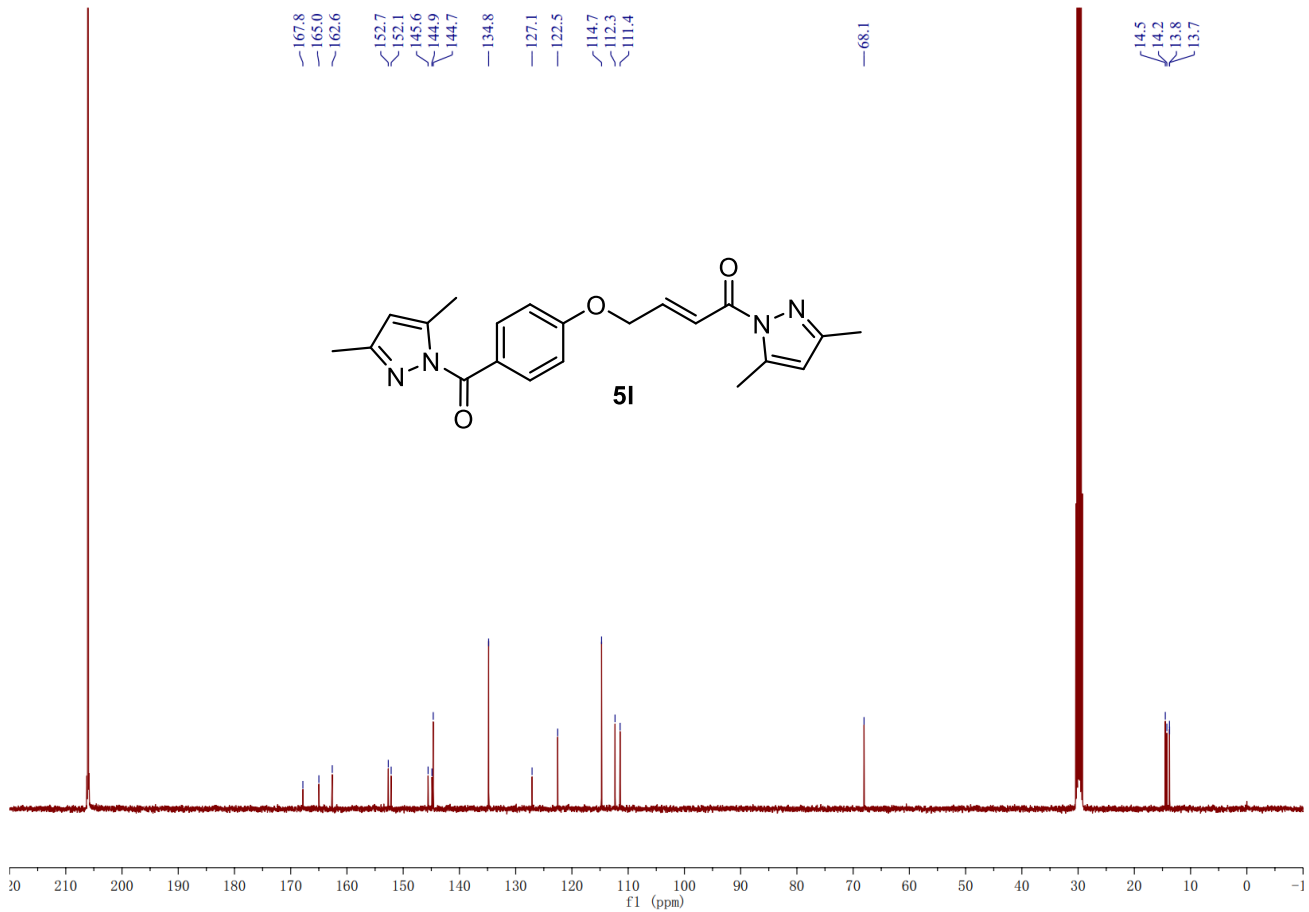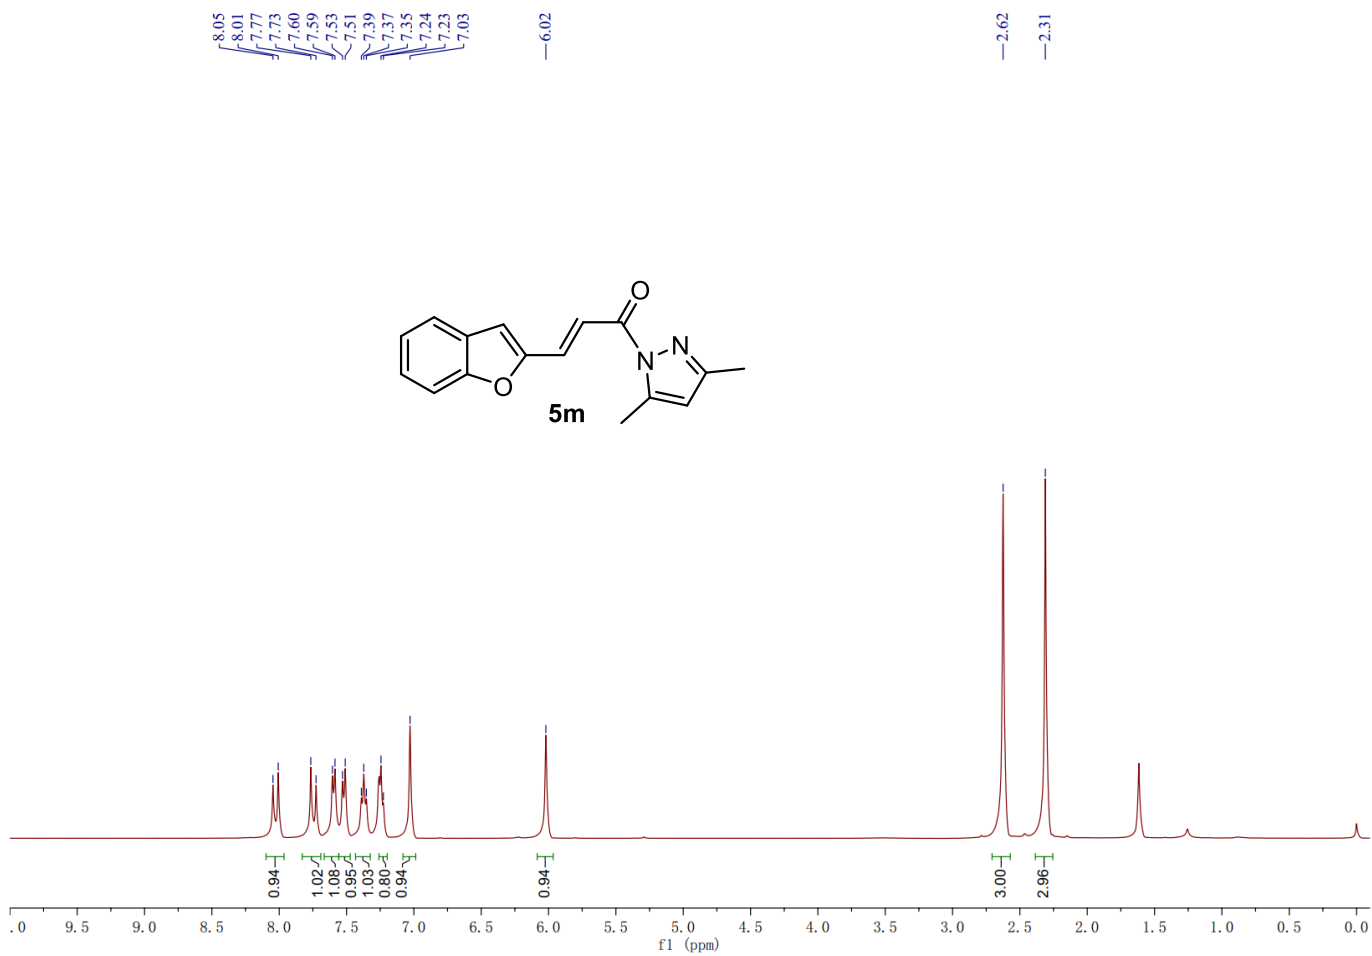

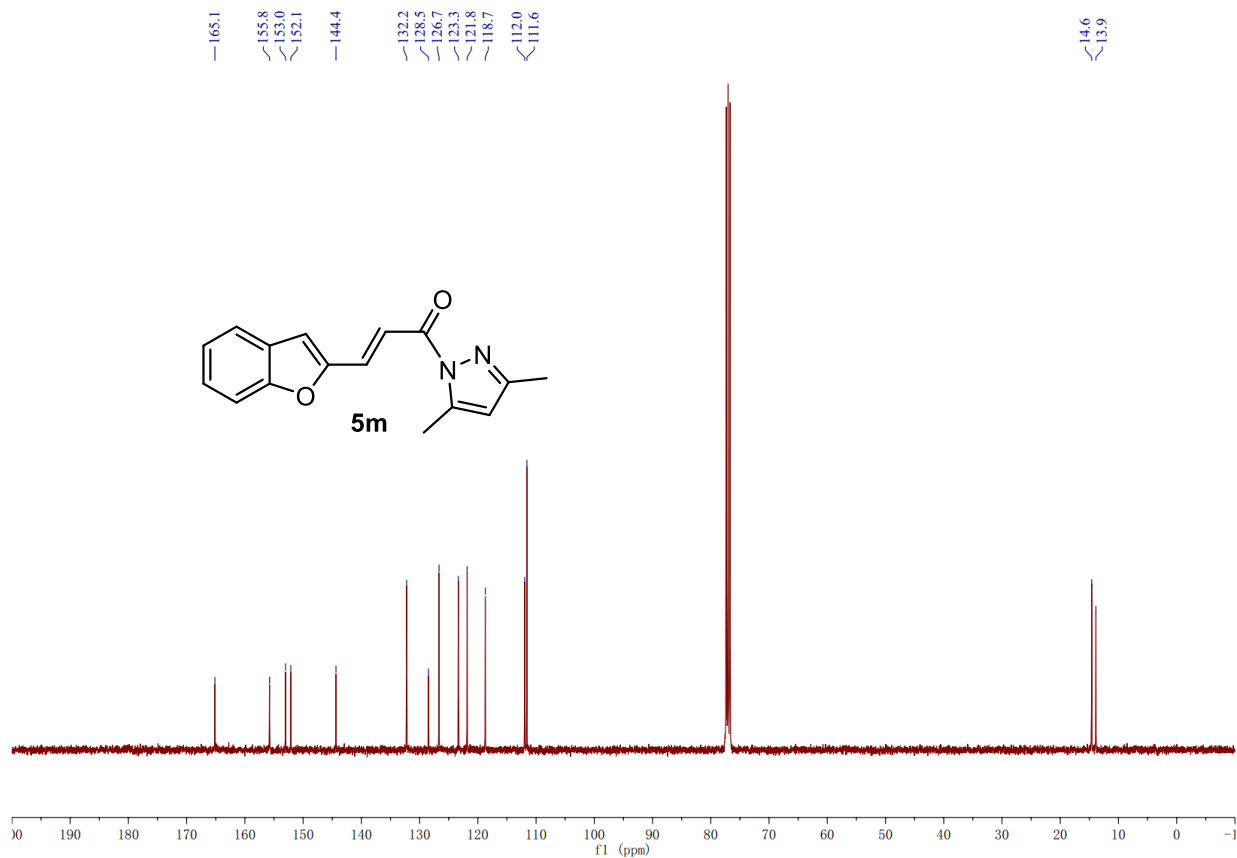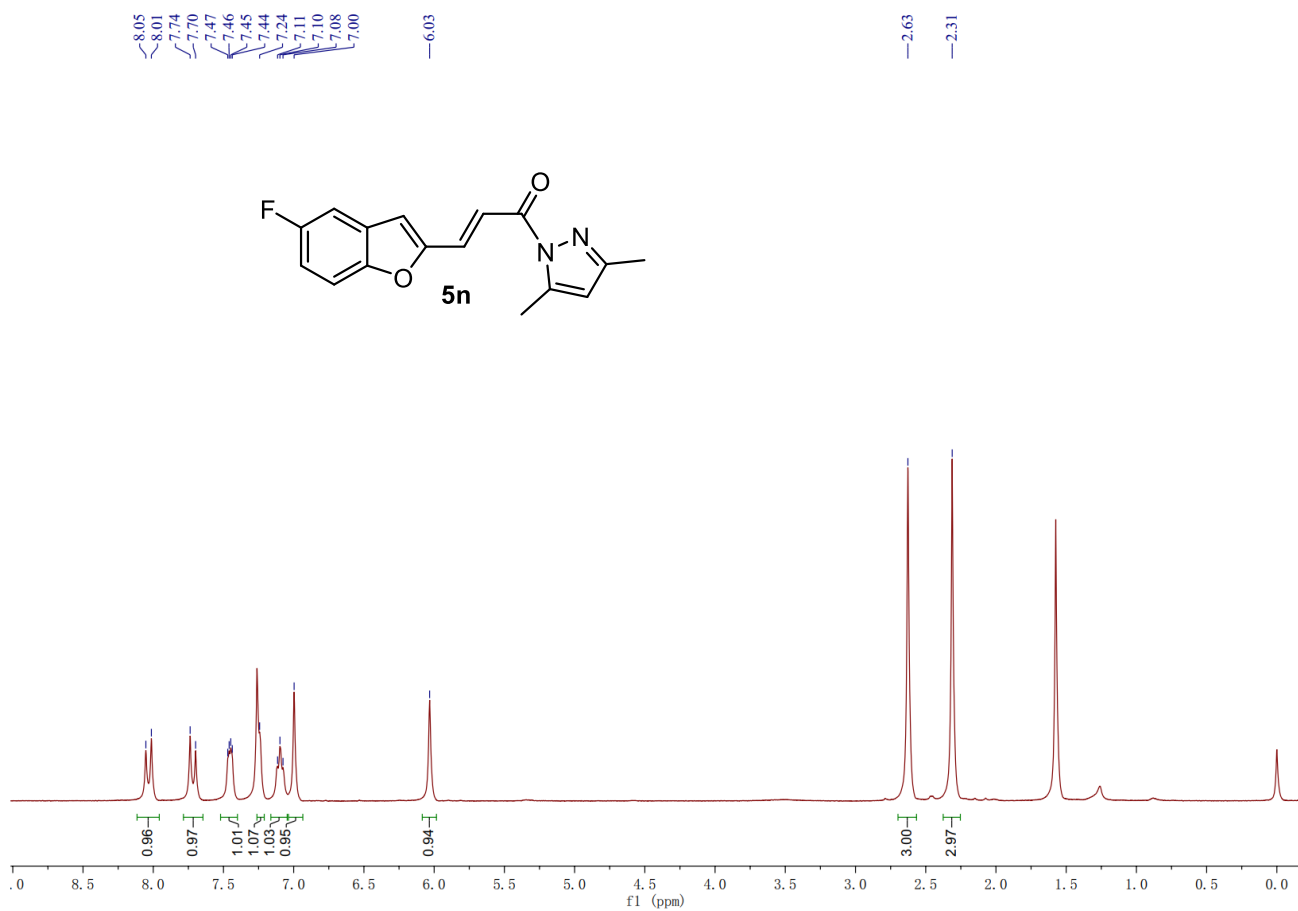

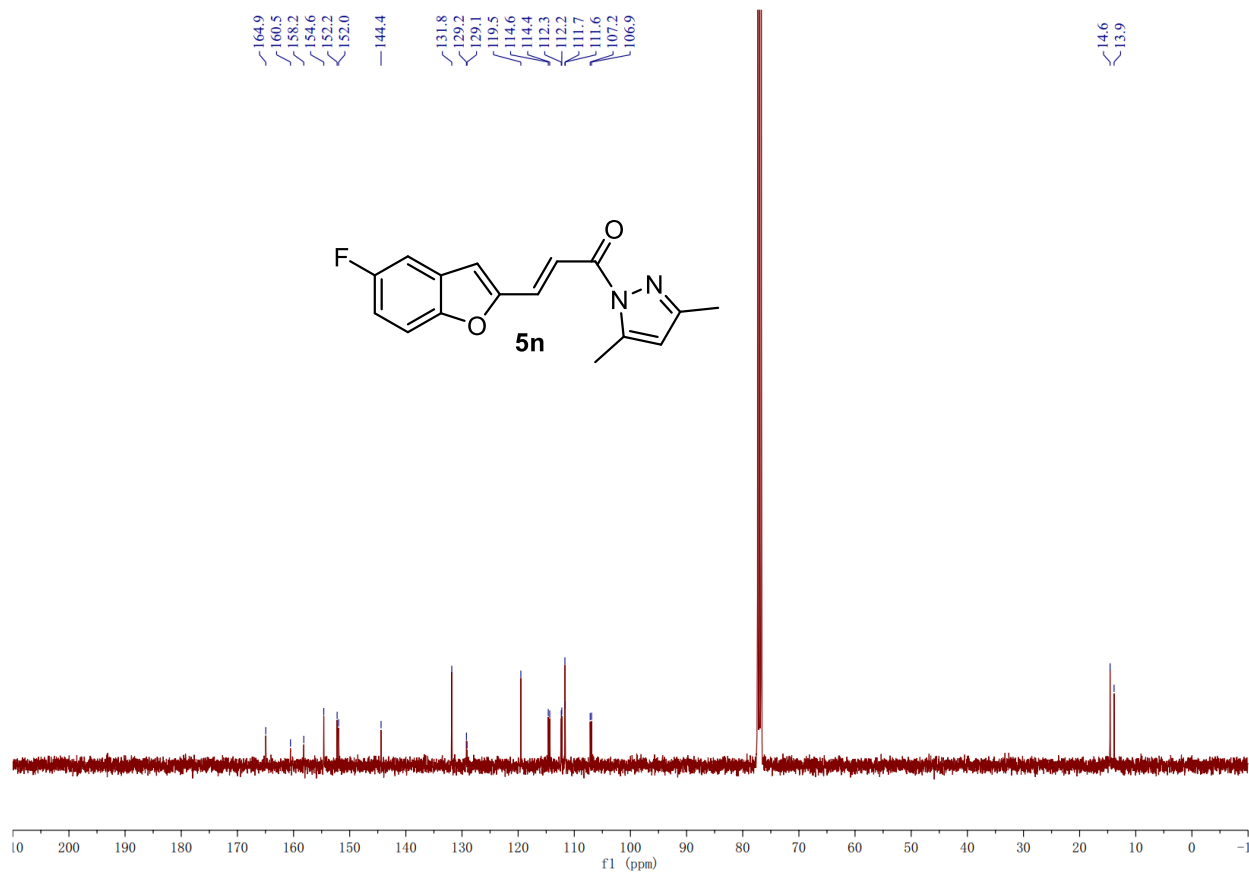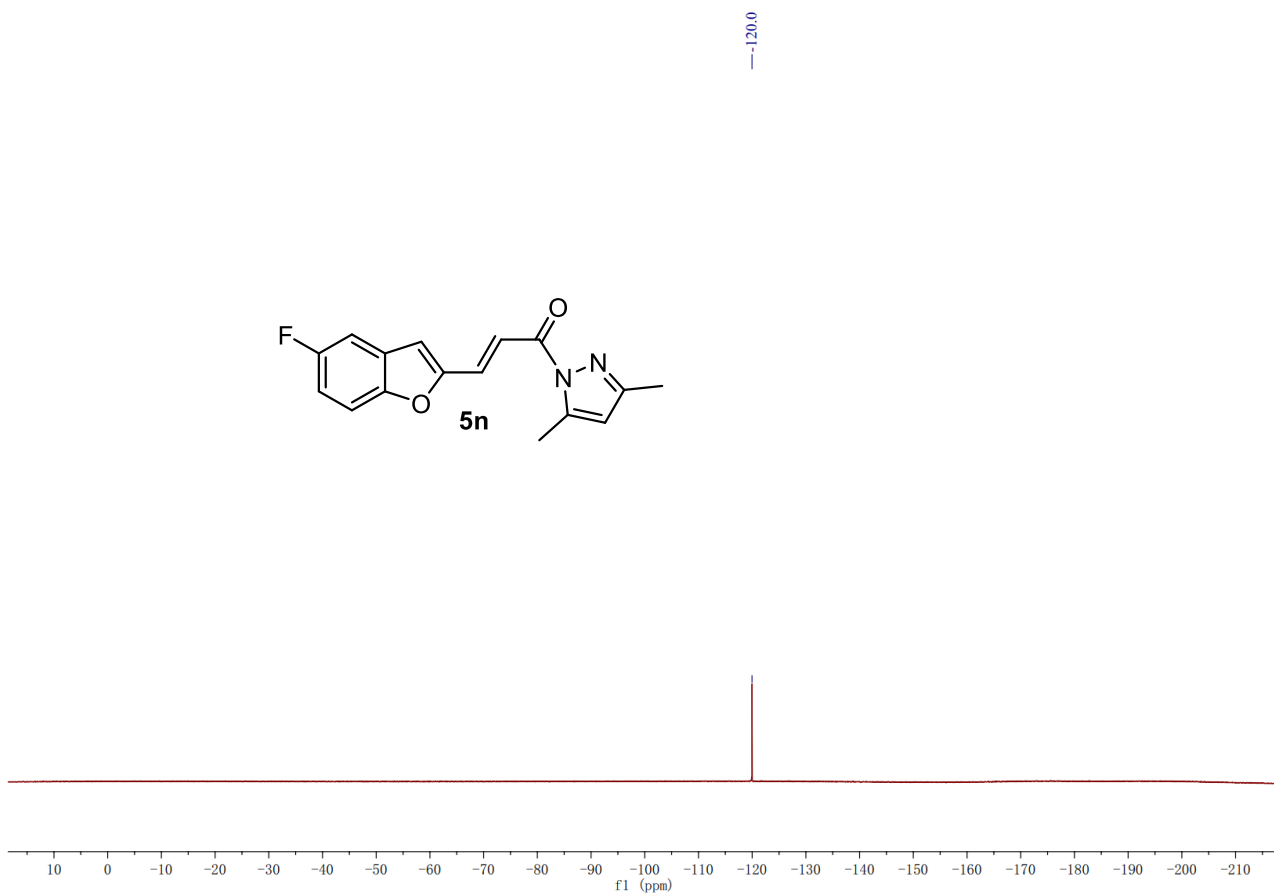

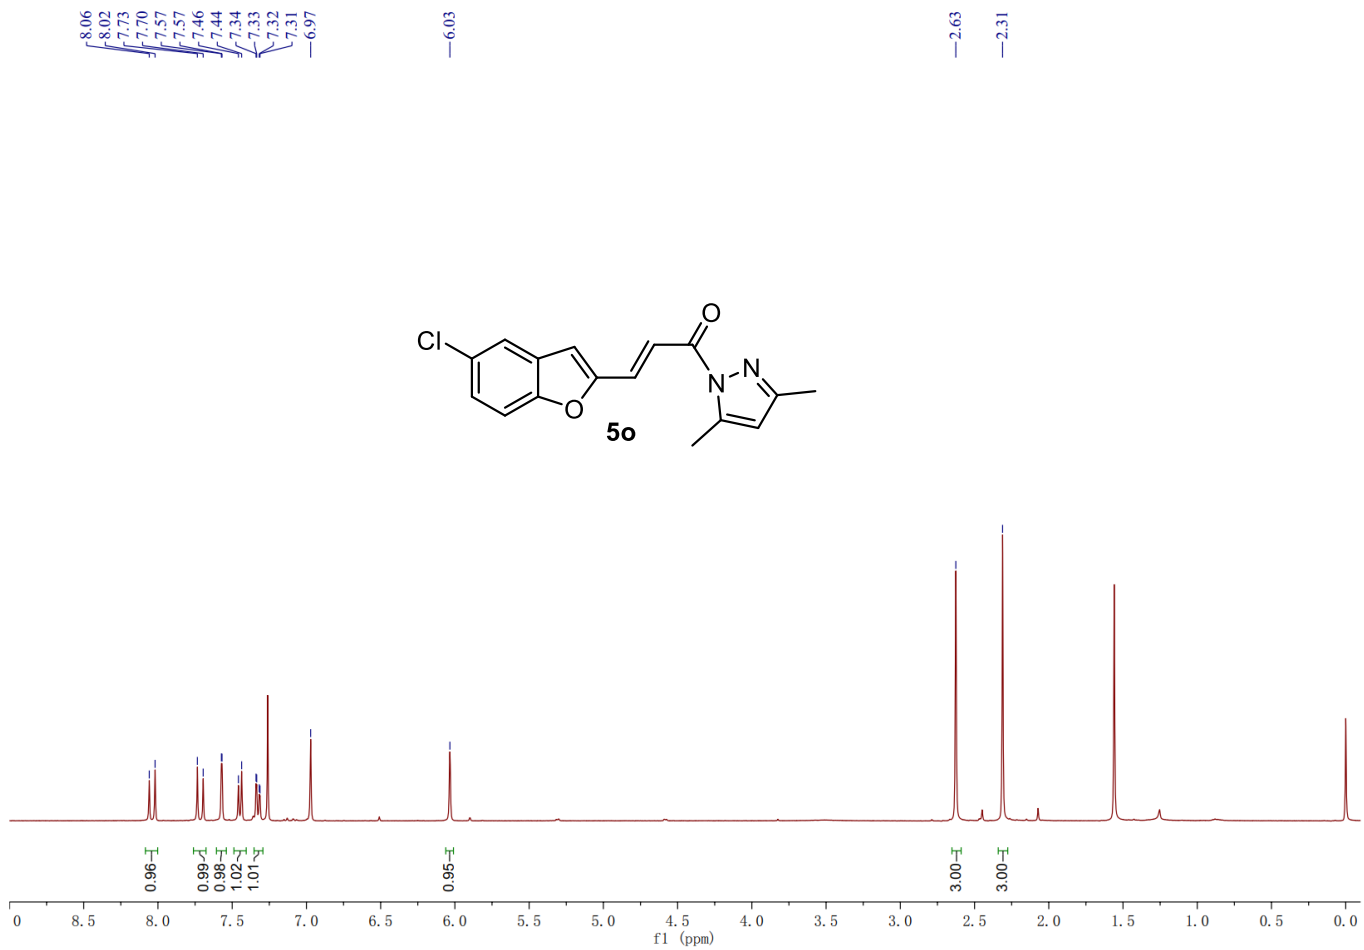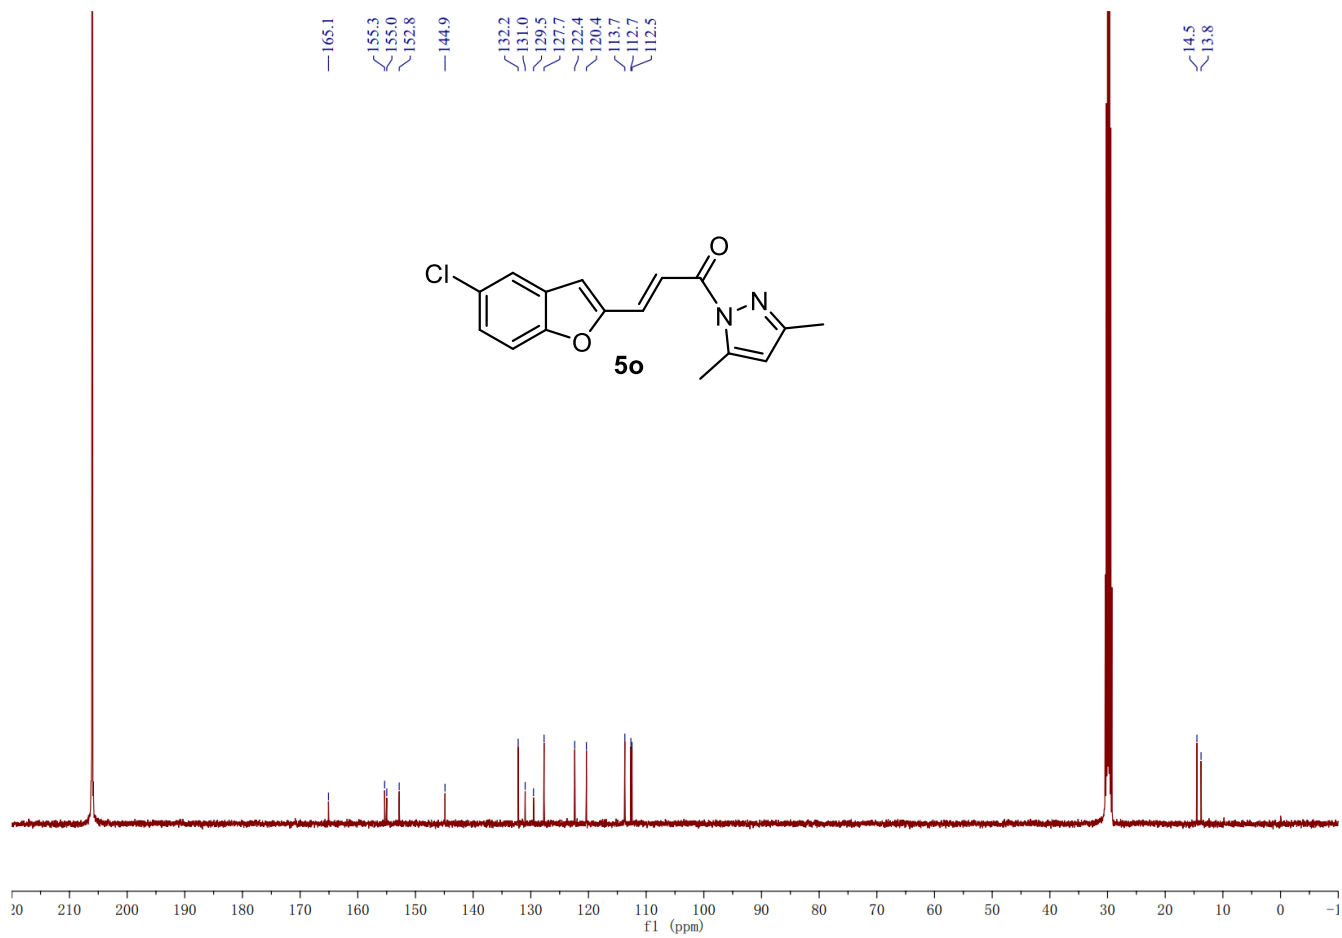

8.06  
8.02  
7.73  
7.69  
7.47  
7.45  
7.41  
7.39  
6.96

6.03

2.62

2.31

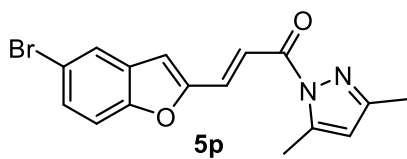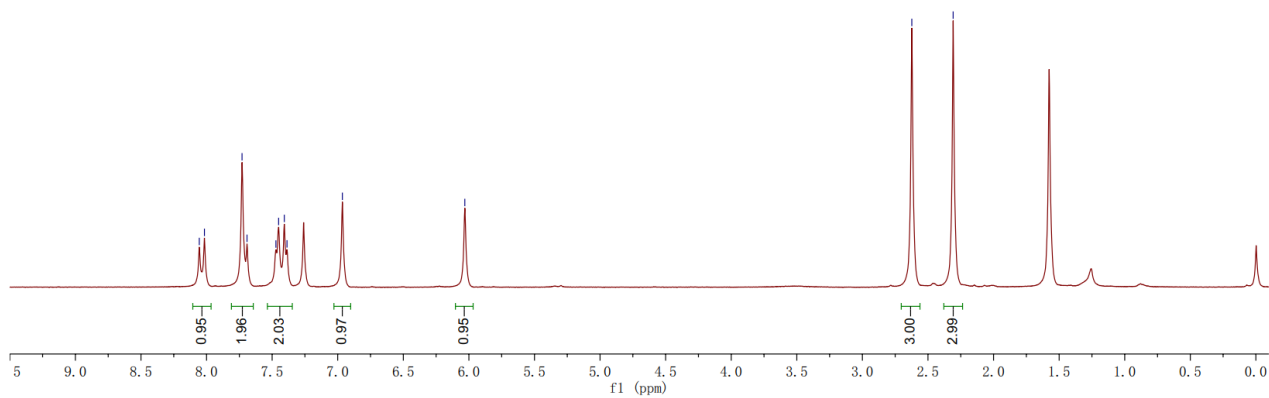

164.9  
154.4  
154.1  
152.3  
144.4  
131.6  
130.4  
129.5  
124.3  
119.8  
116.4  
113.0  
111.7  
110.8

14.6  
13.9

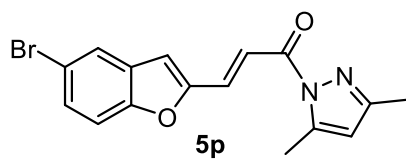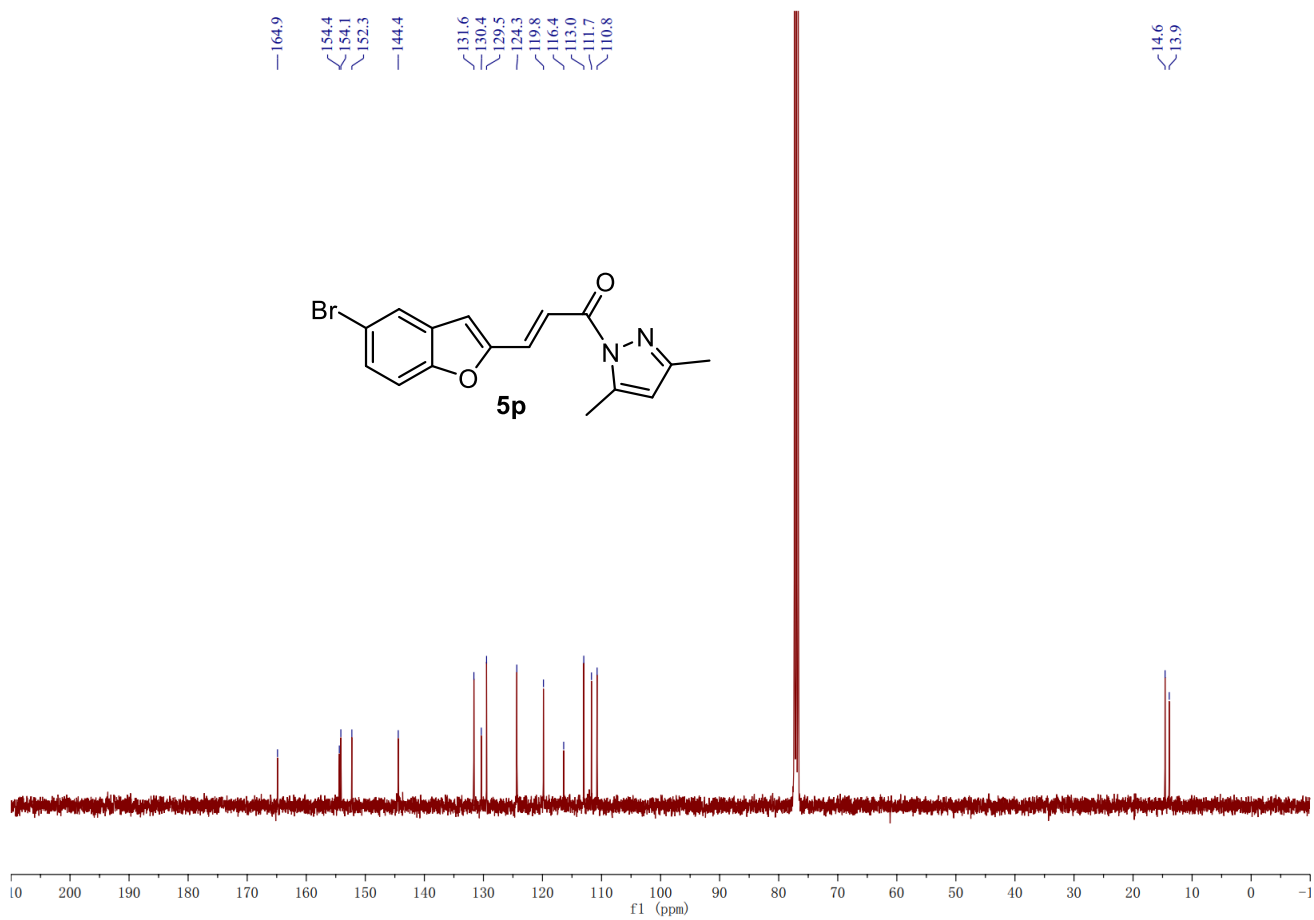

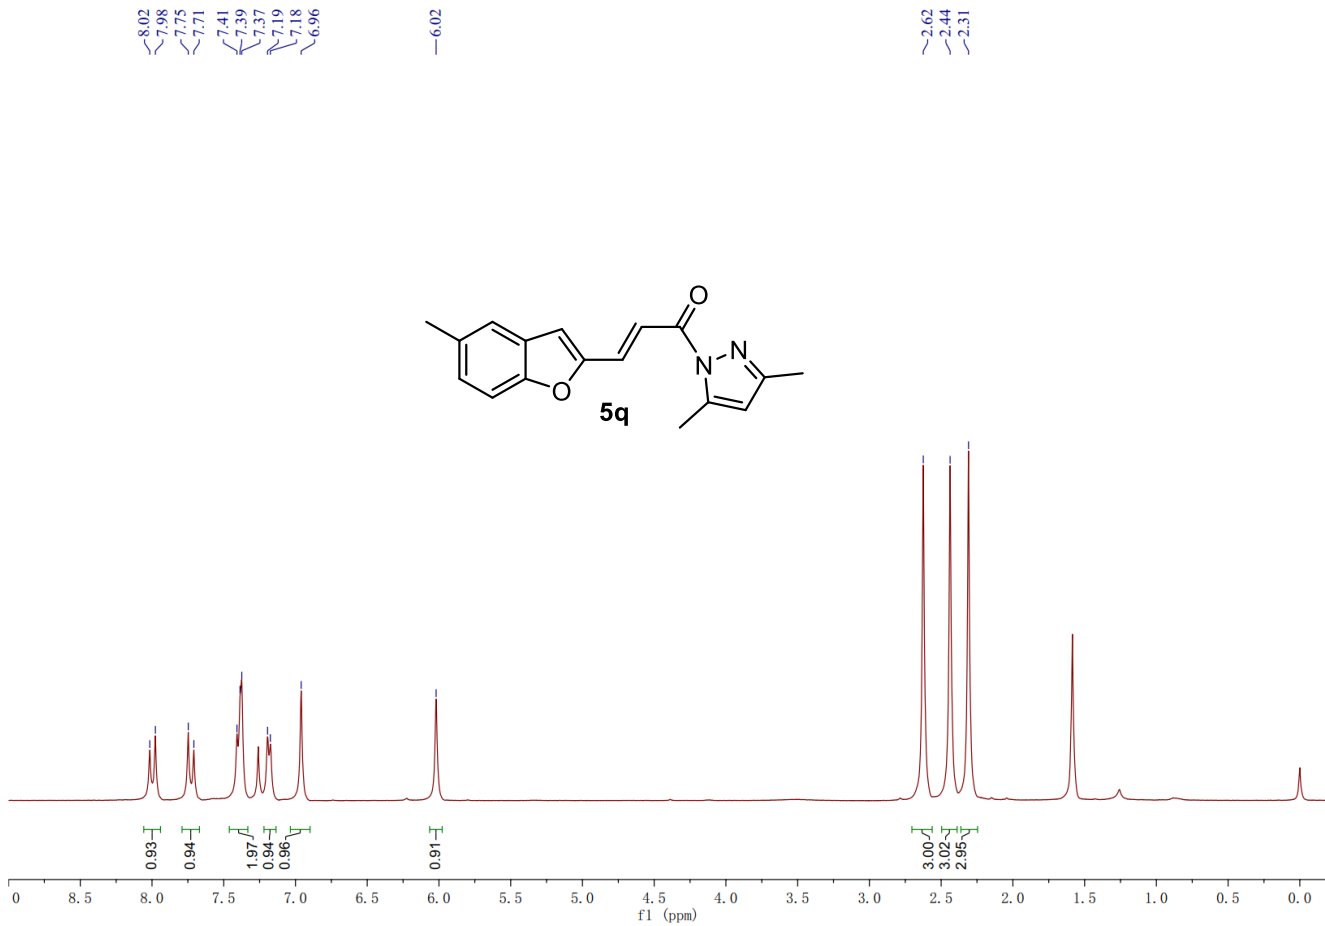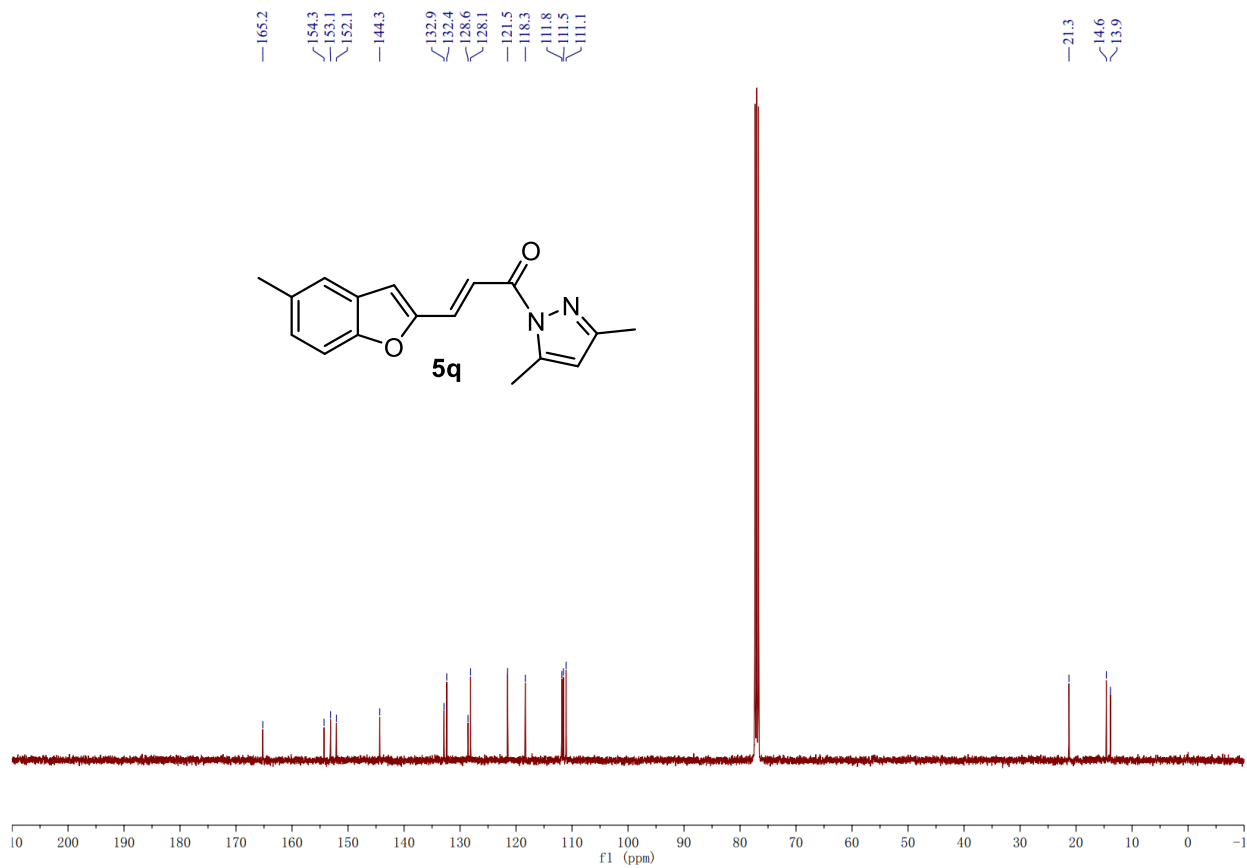

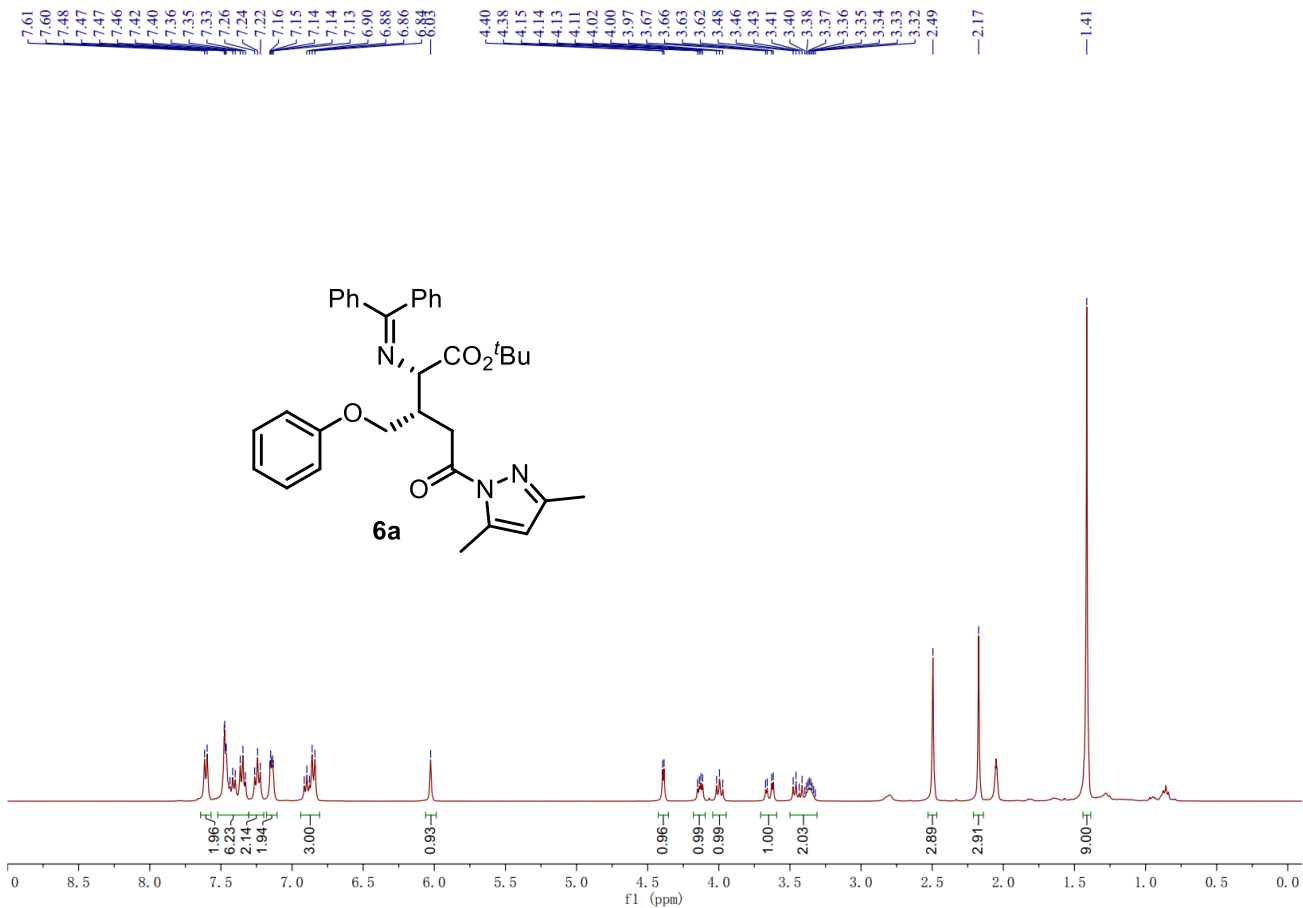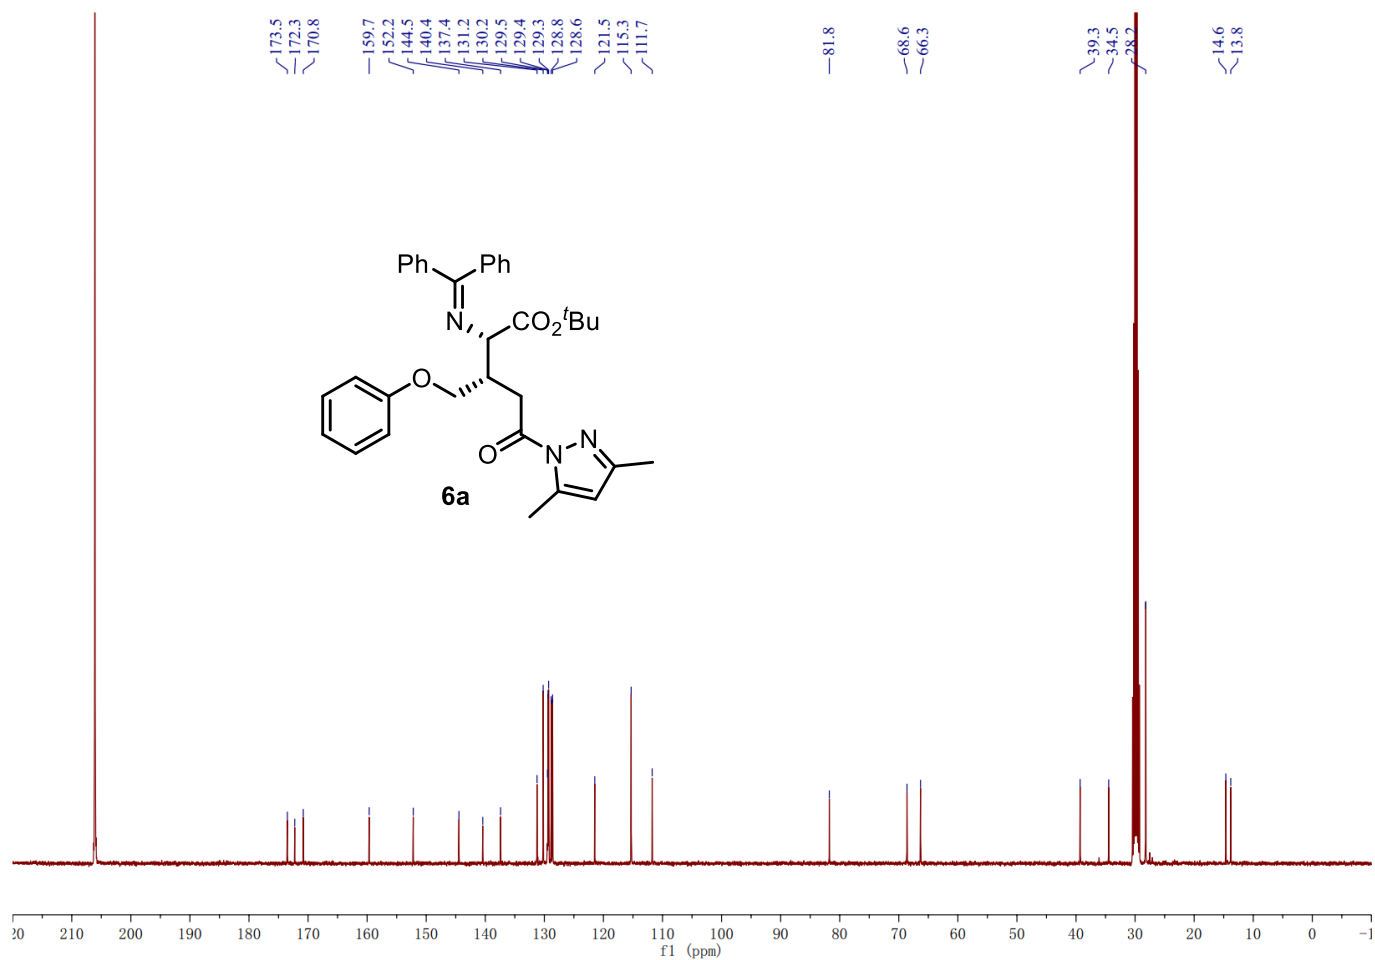

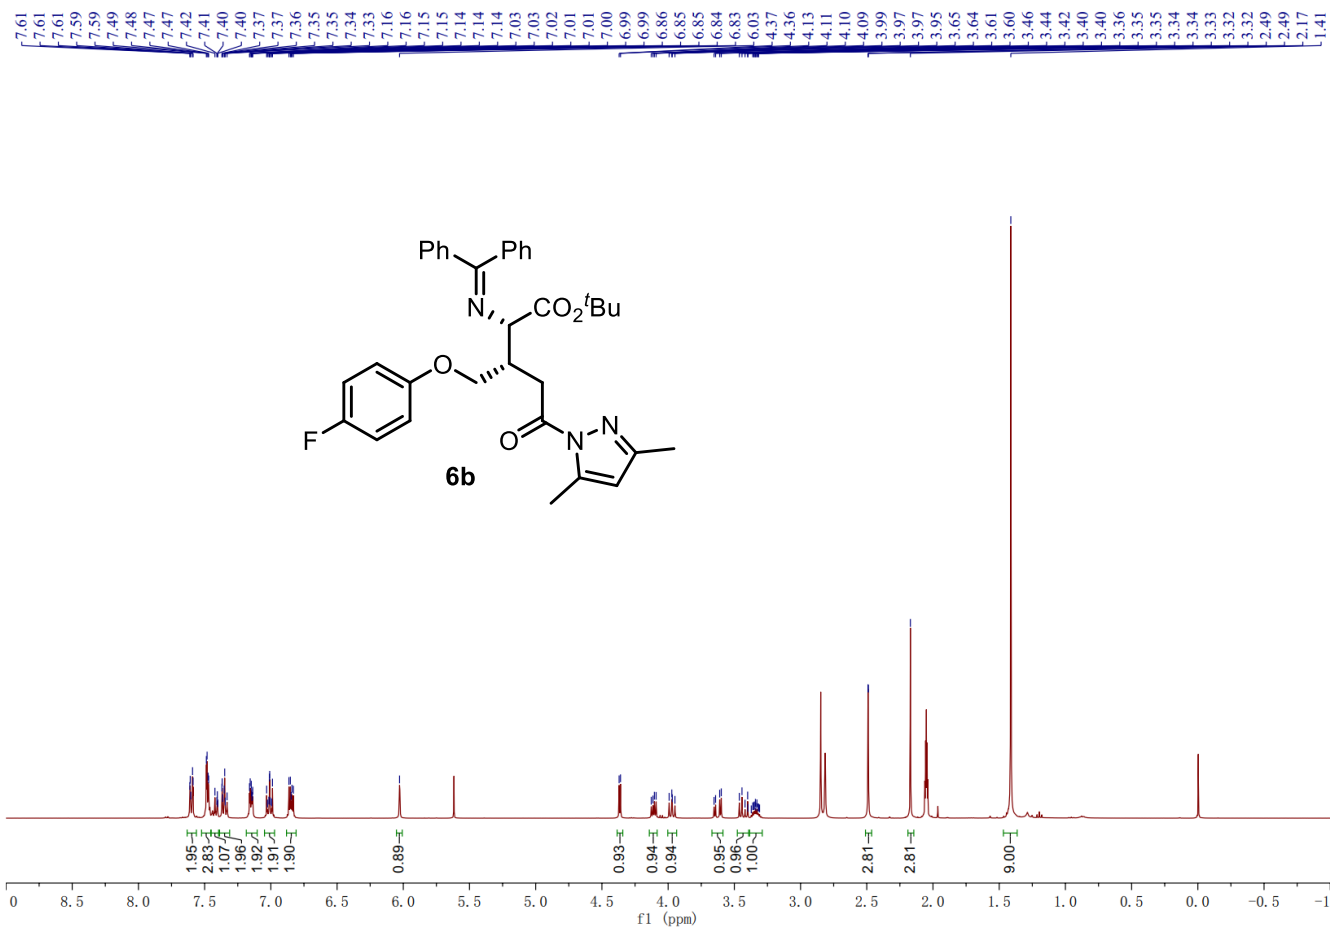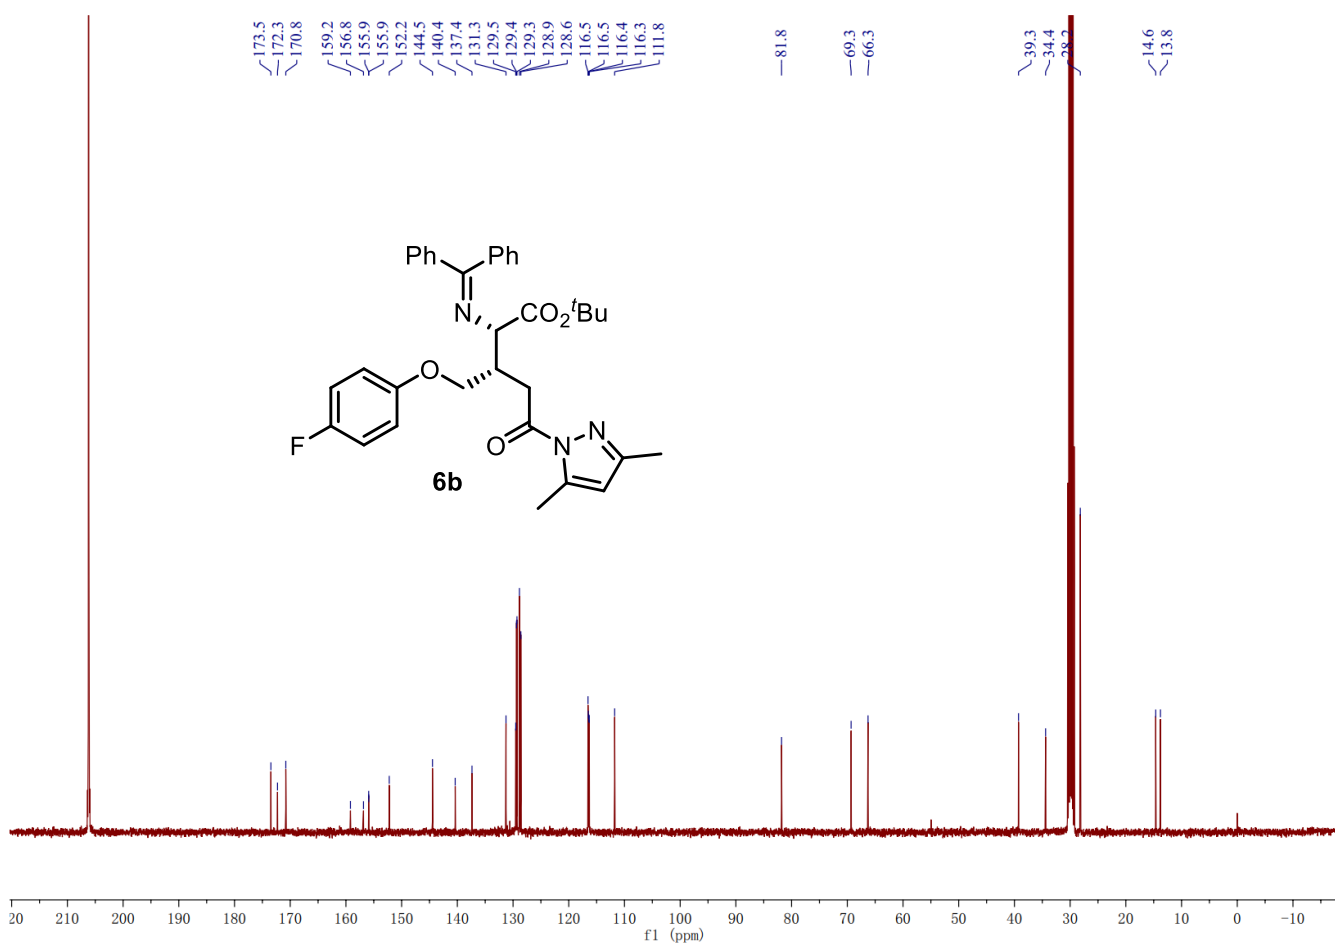

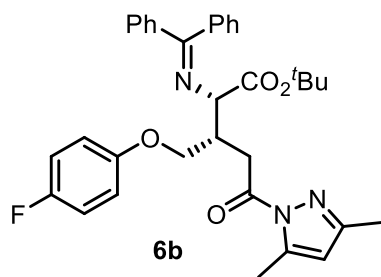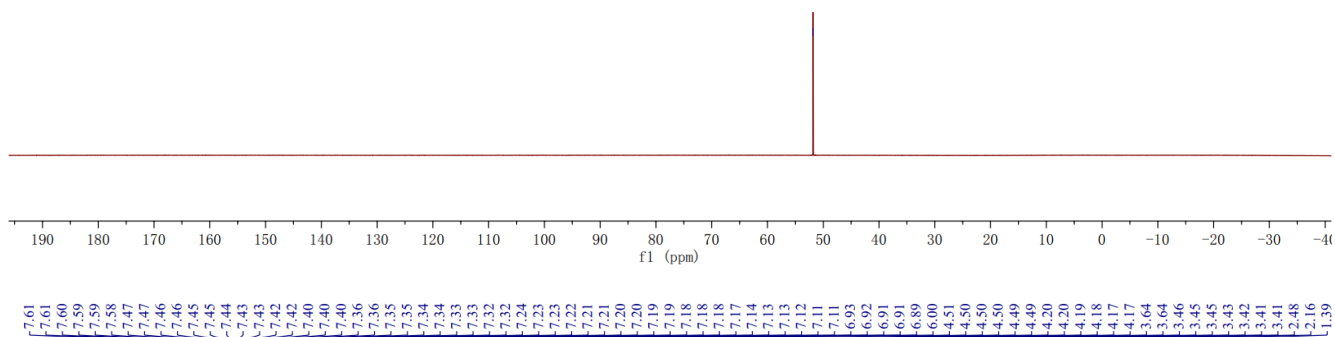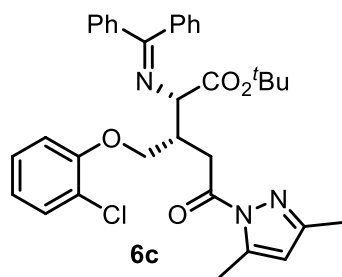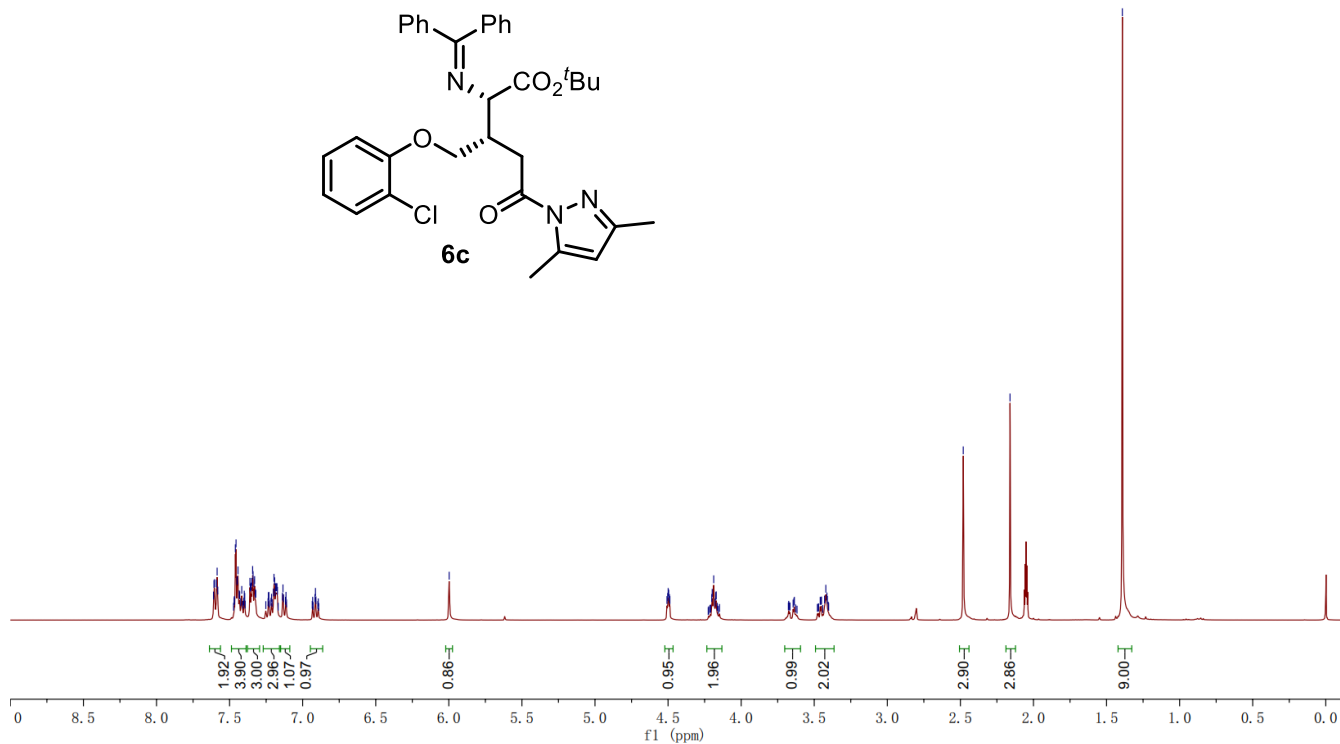

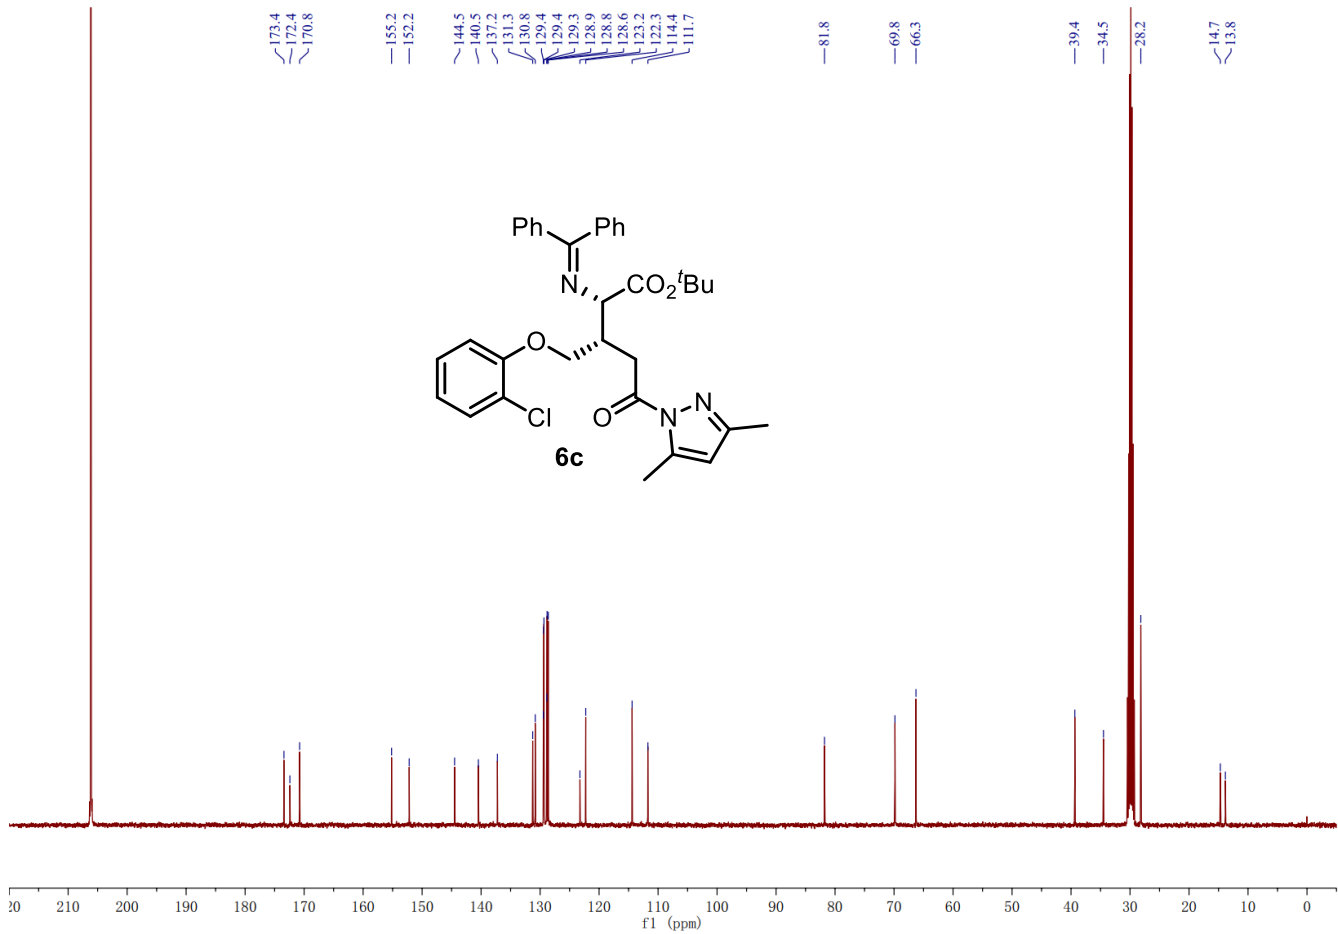

7.60, 7.59, 7.58, 7.51, 7.49, 7.47, 7.46, 7.45, 7.44, 7.44, 7.41, 7.40, 7.39, 7.36, 7.35, 7.33, 7.33, 7.32, 7.30, 7.30, 7.28, 7.28, 7.28, 7.27, 7.26, 7.26, 7.22, 7.21, 7.21, 7.21, 7.20, 7.20, 7.20, 7.19, 7.19, 7.10, 7.10, 7.08, 7.08, 6.87, 6.87, 6.85, 6.85, 6.83, 6.83, 5.99, 4.54, 4.52, 4.20, 4.18, 3.67, 3.64, 3.62, 3.45, 3.43, 3.42, 3.41, 3.40, 2.48, 2.47, 2.16, 1.38

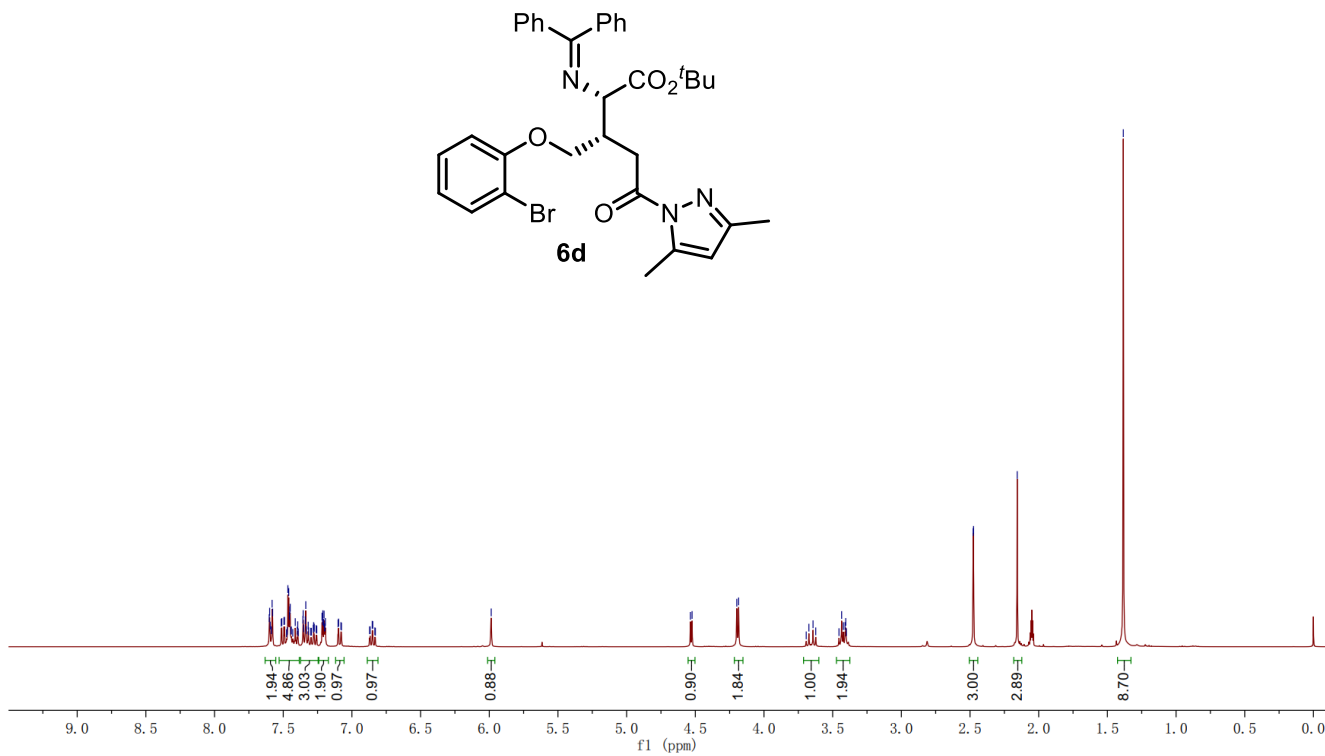

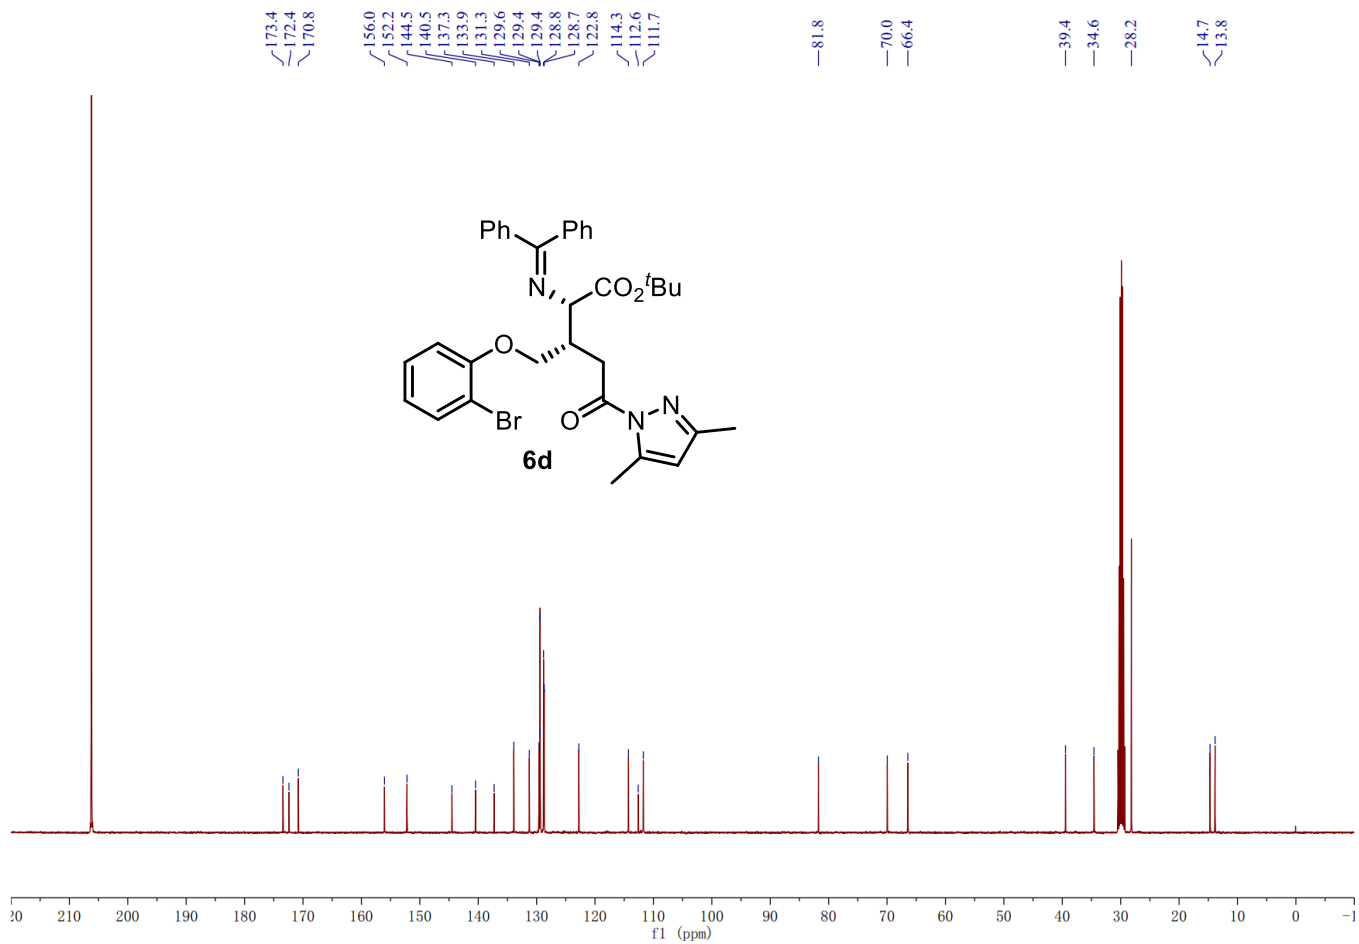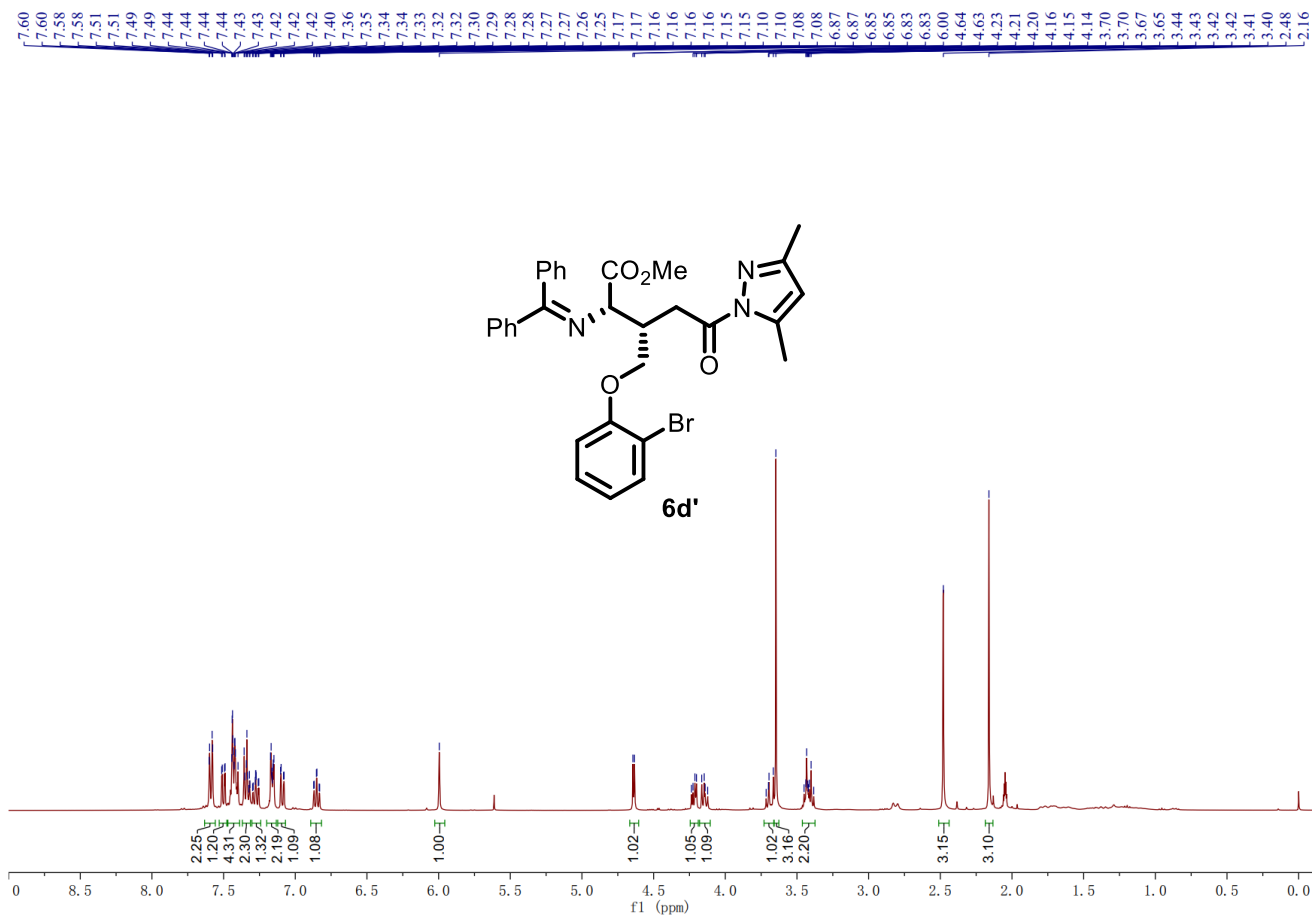

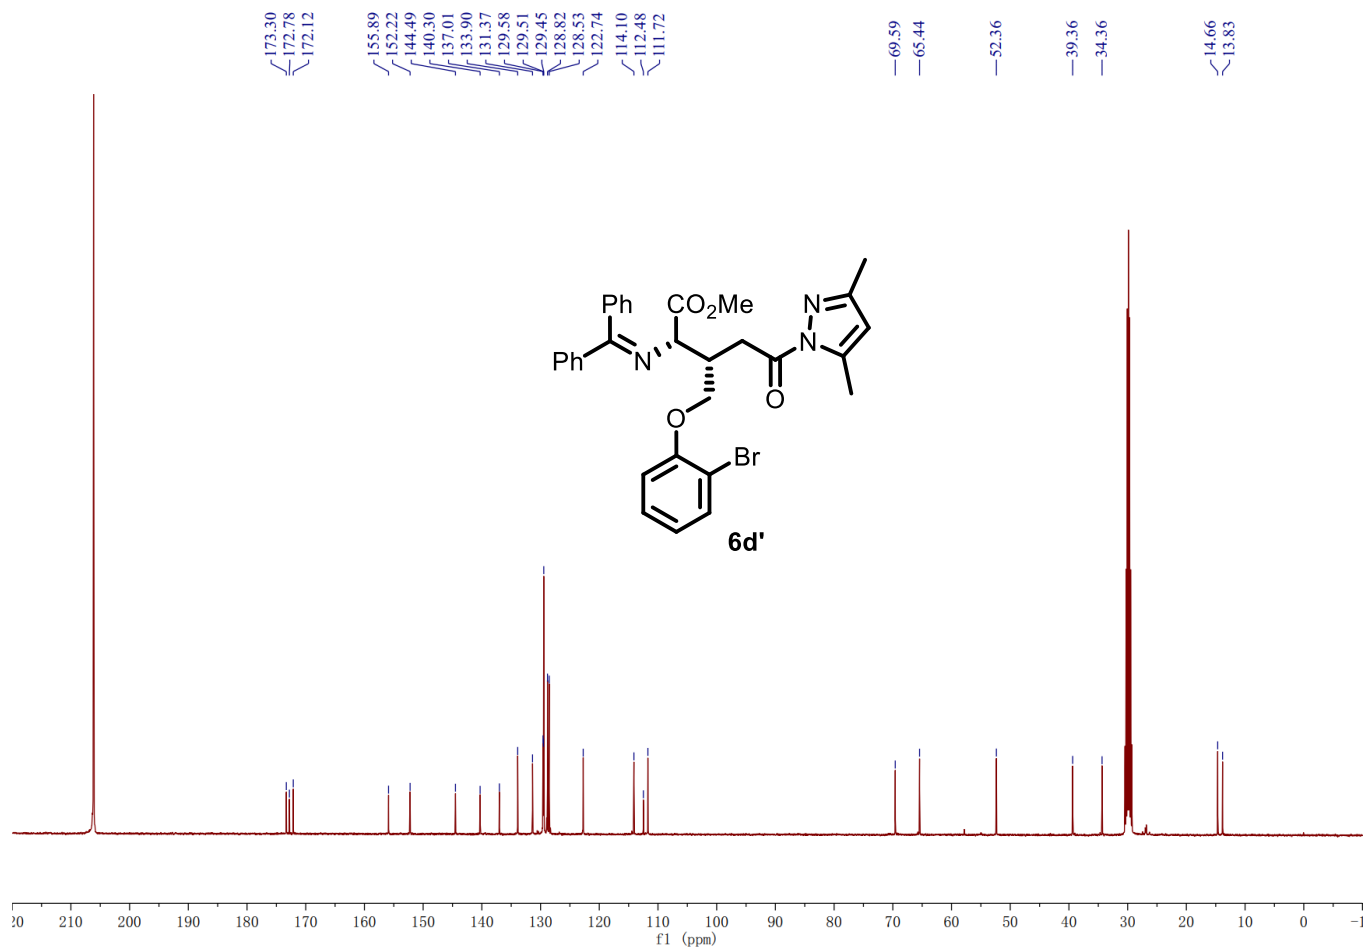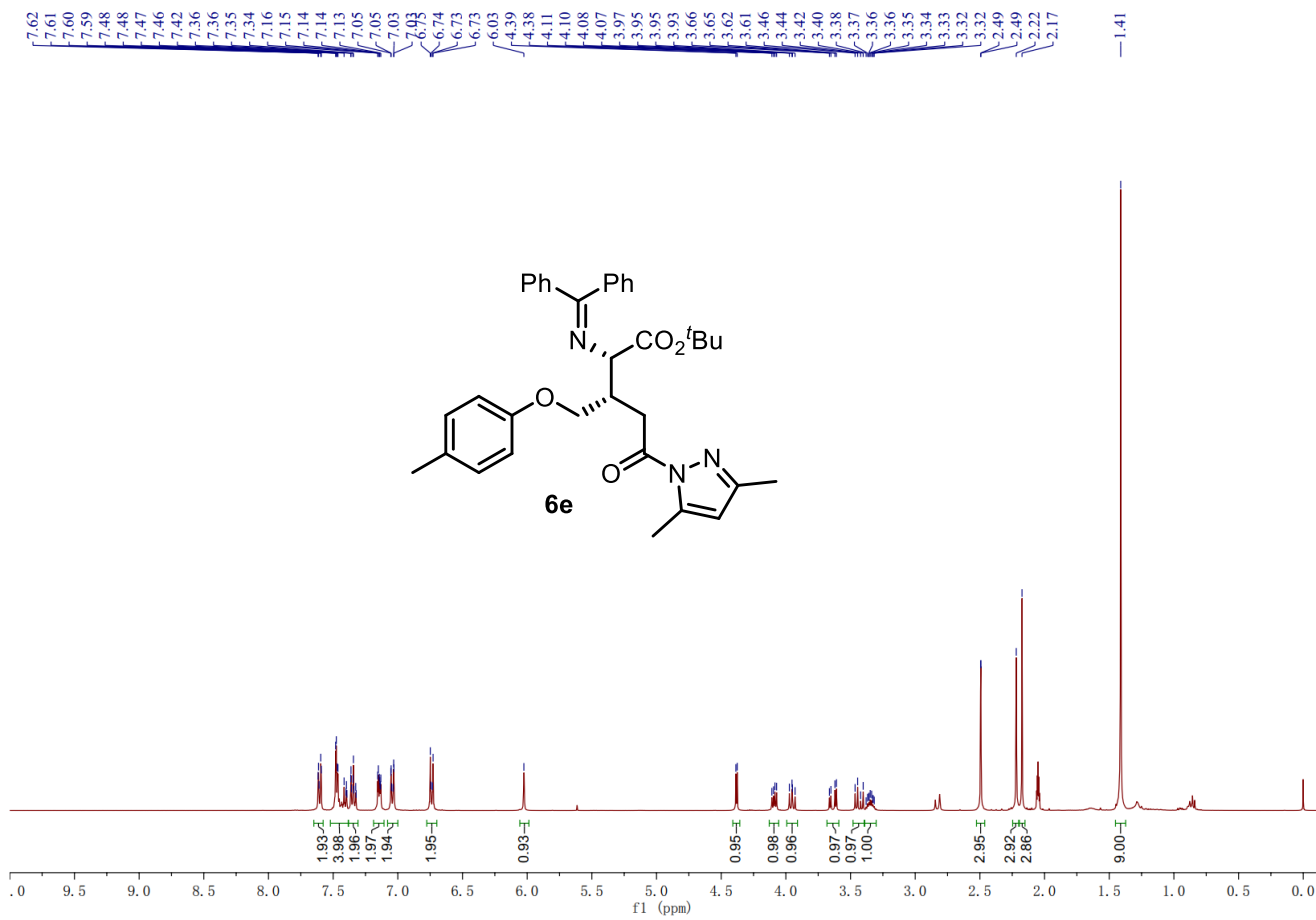

173.51  
172.23  
170.84  
157.57  
152.19  
144.45  
140.42  
137.42  
131.24  
130.60  
130.41  
129.47  
129.38  
129.28  
128.85  
128.62  
115.14  
111.75  
81.74  
68.68  
66.30  
39.28  
34.46  
28.19  
20.49  
14.66  
13.82

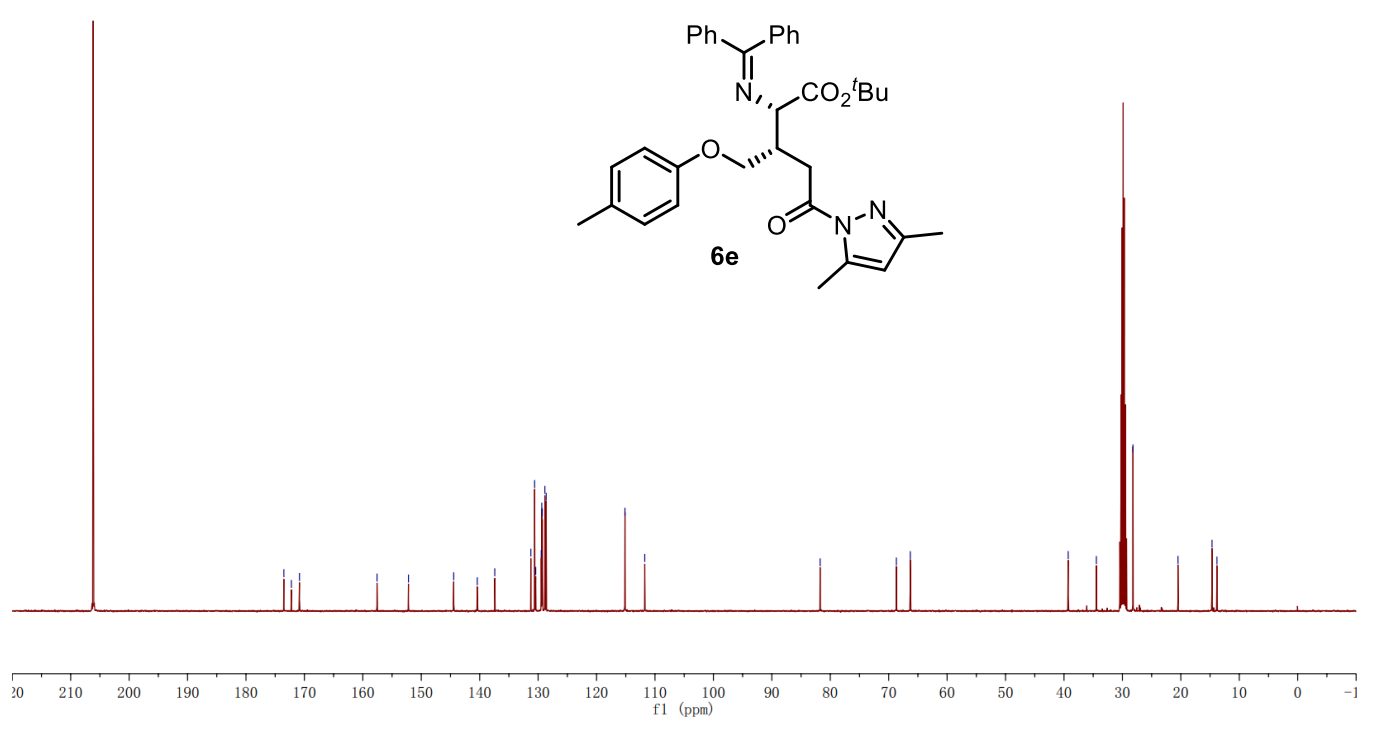

7.62  
7.60  
7.60  
7.49  
7.48  
7.47  
7.47  
7.47  
7.41  
7.36  
7.36  
7.35  
7.34  
7.17  
7.16  
7.15  
6.84  
6.80  
6.79  
6.79  
6.78  
6.78  
6.77  
6.75  
6.02  
4.39  
4.38  
4.08  
4.07  
4.06  
4.05  
3.97  
3.95  
3.93  
3.93  
3.92  
3.91  
3.67  
3.65  
3.62  
3.61  
3.46  
3.44  
3.42  
3.40  
3.38  
3.37  
3.36  
3.35  
3.35  
3.33  
3.33  
3.32  
3.31  
2.49  
2.18  
1.41  
1.33  
1.31  
1.29

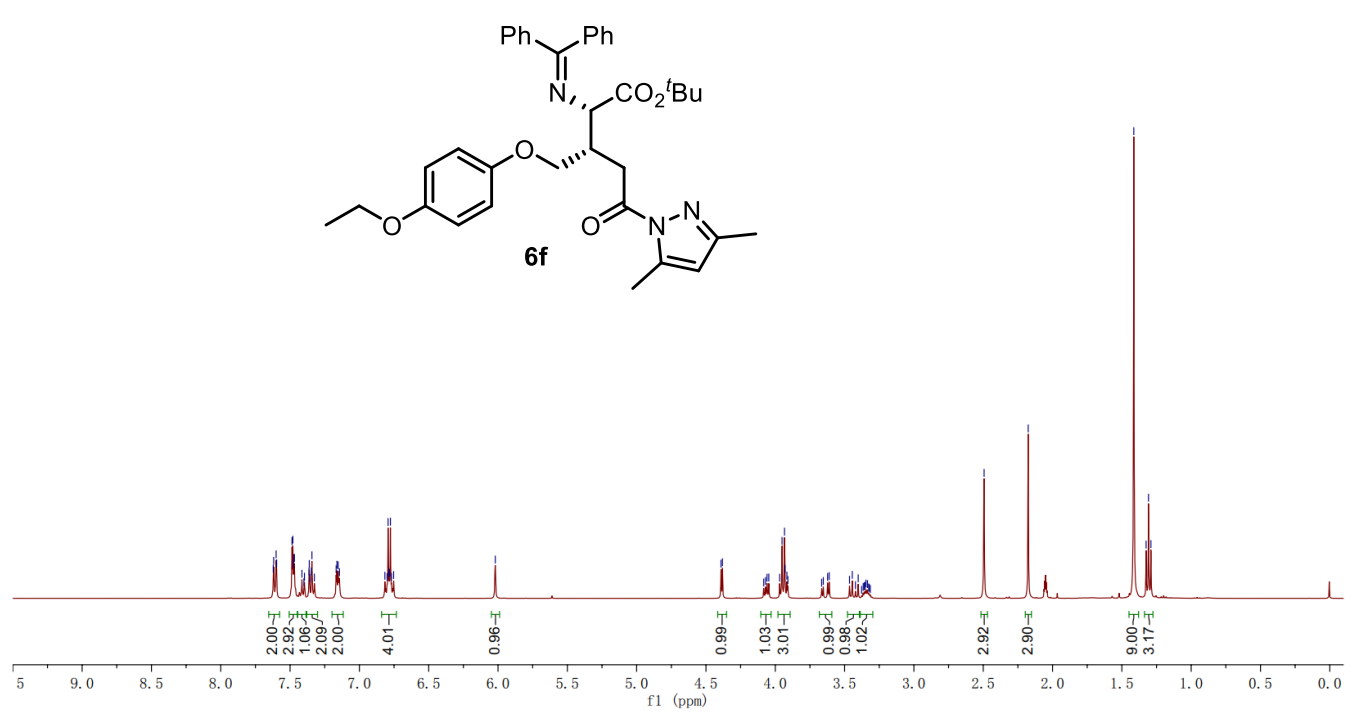

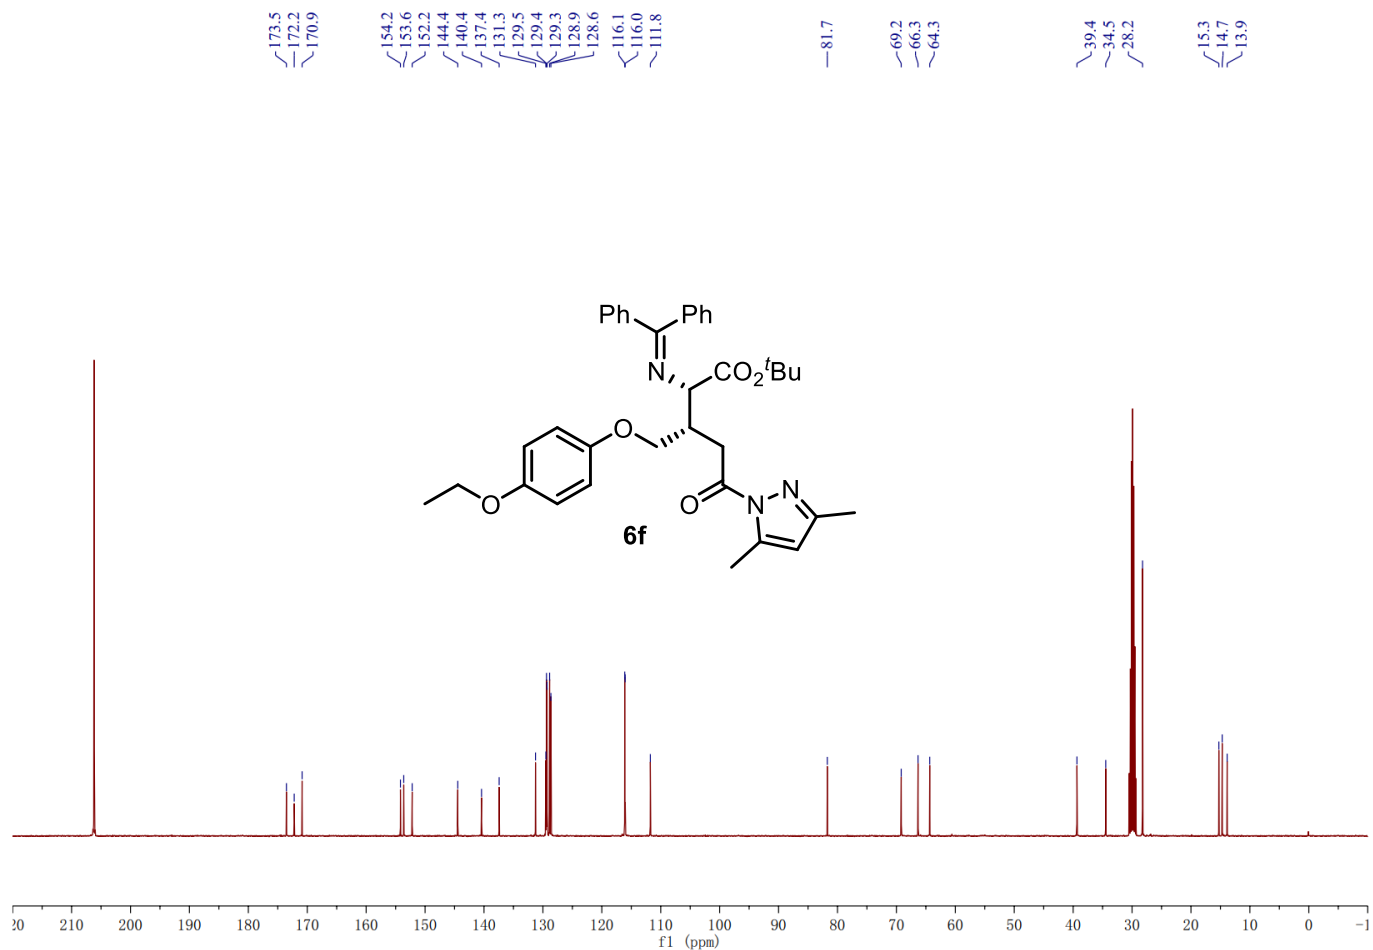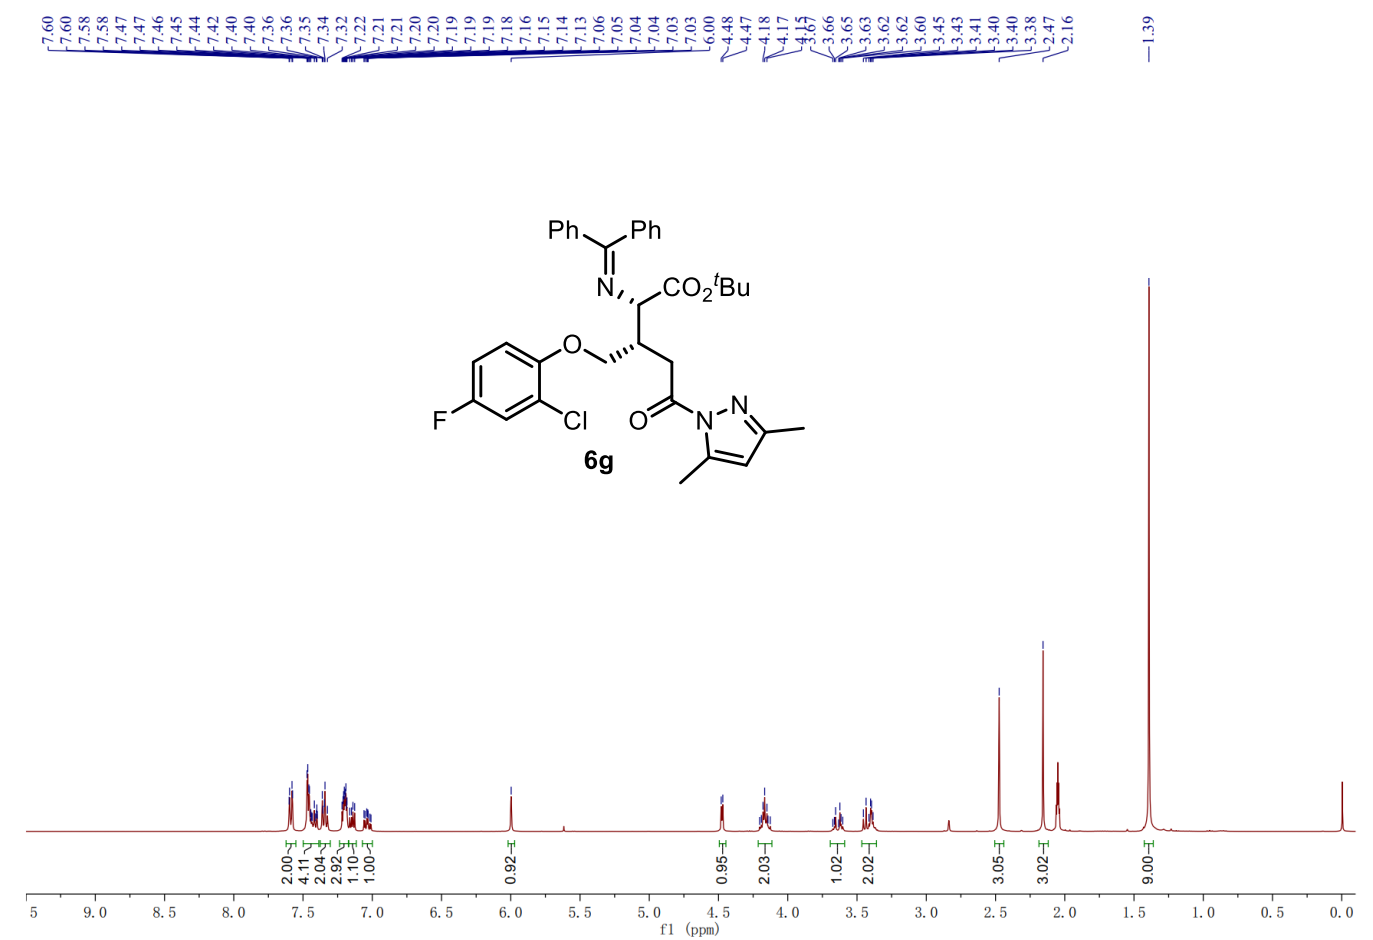

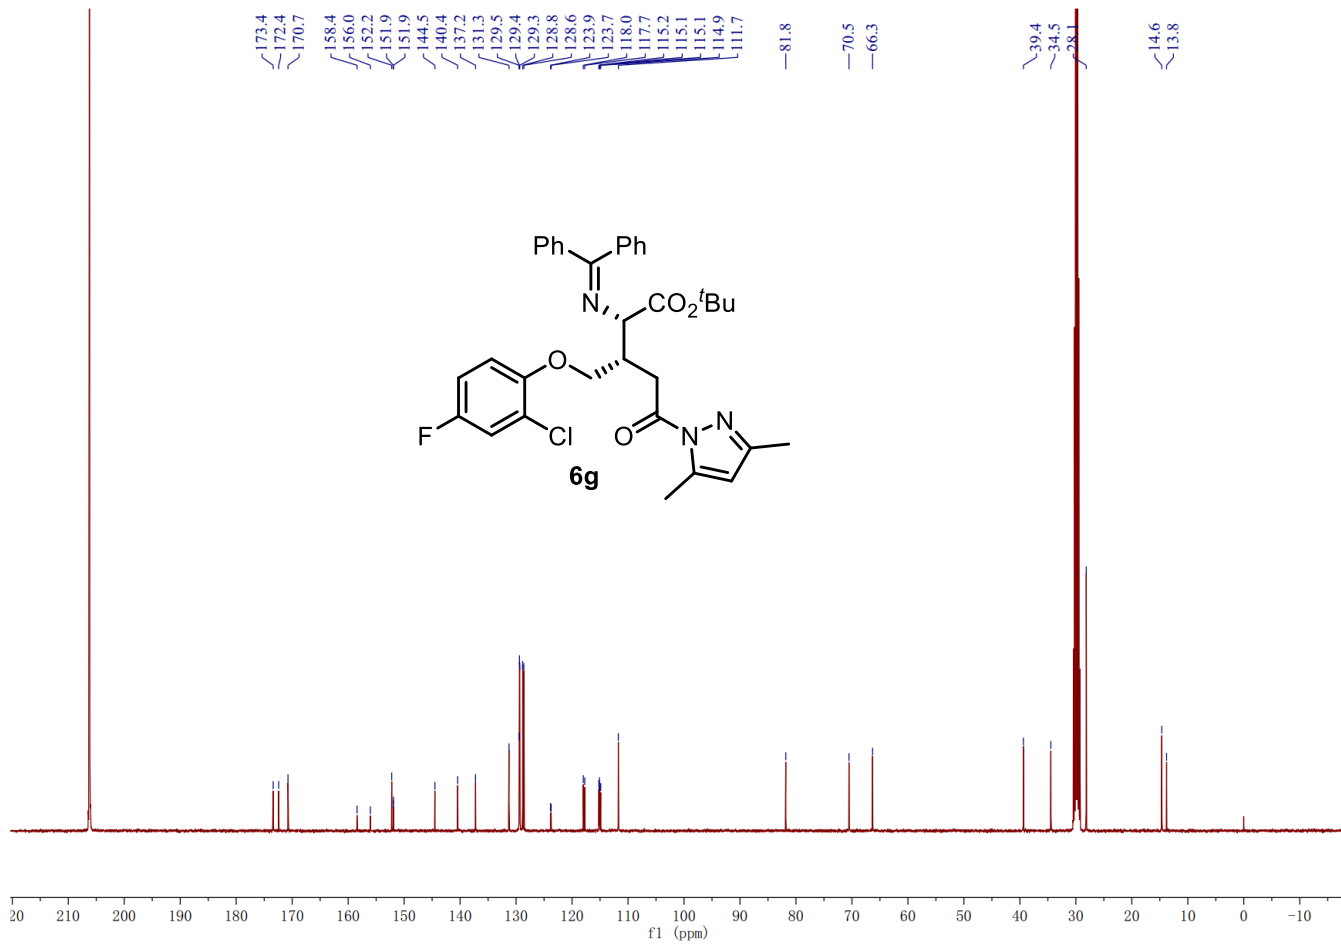

— 54.0

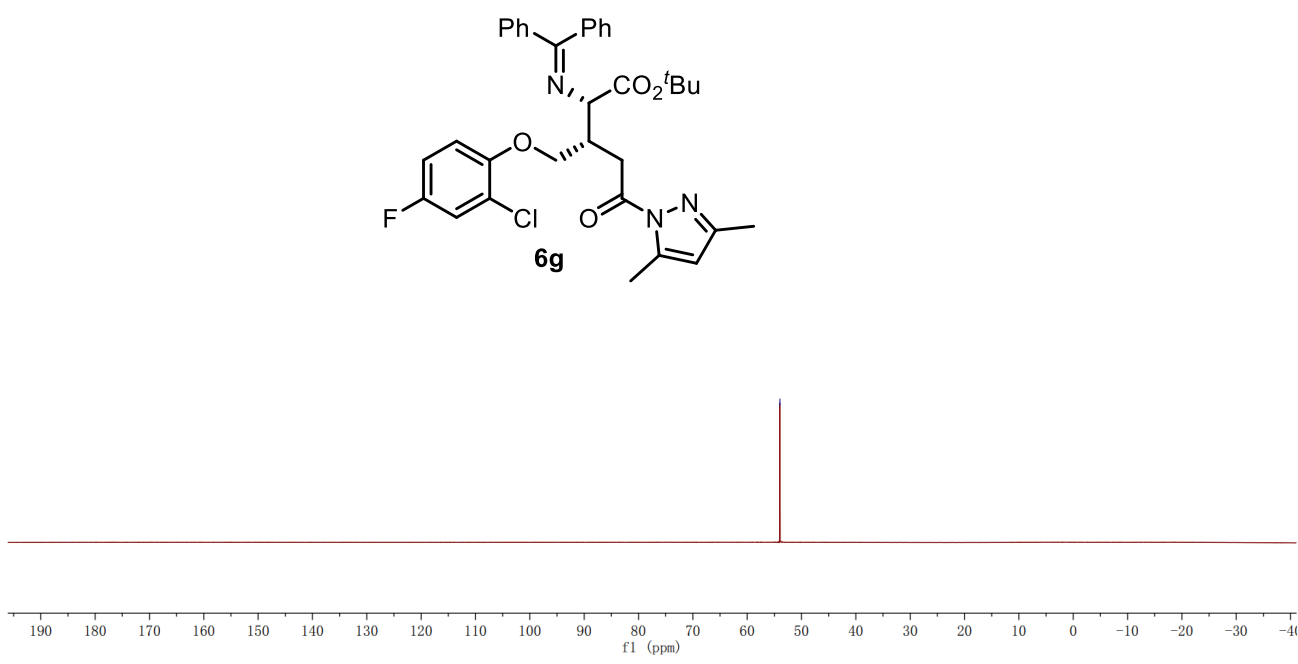

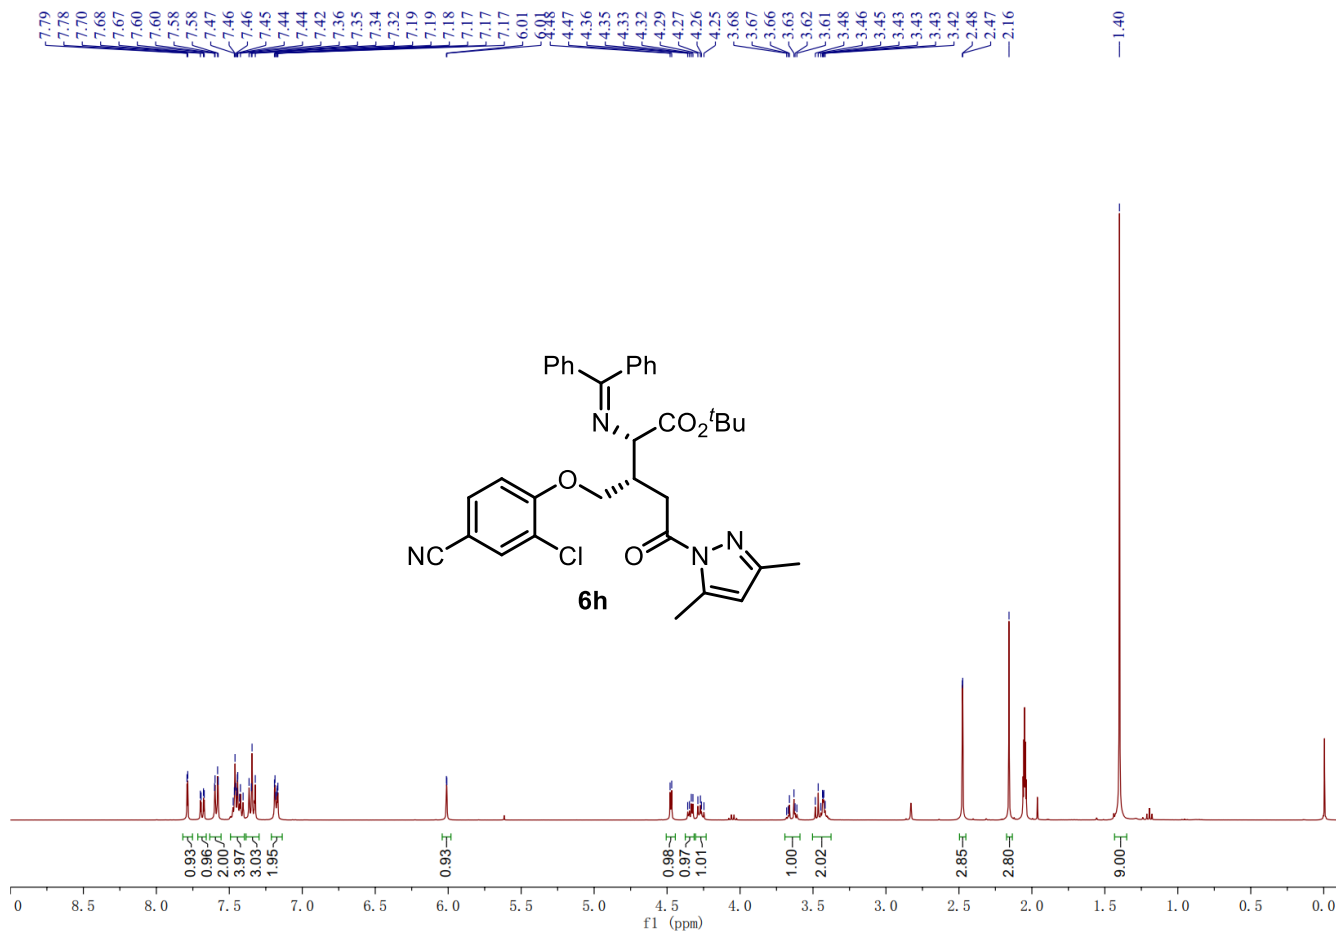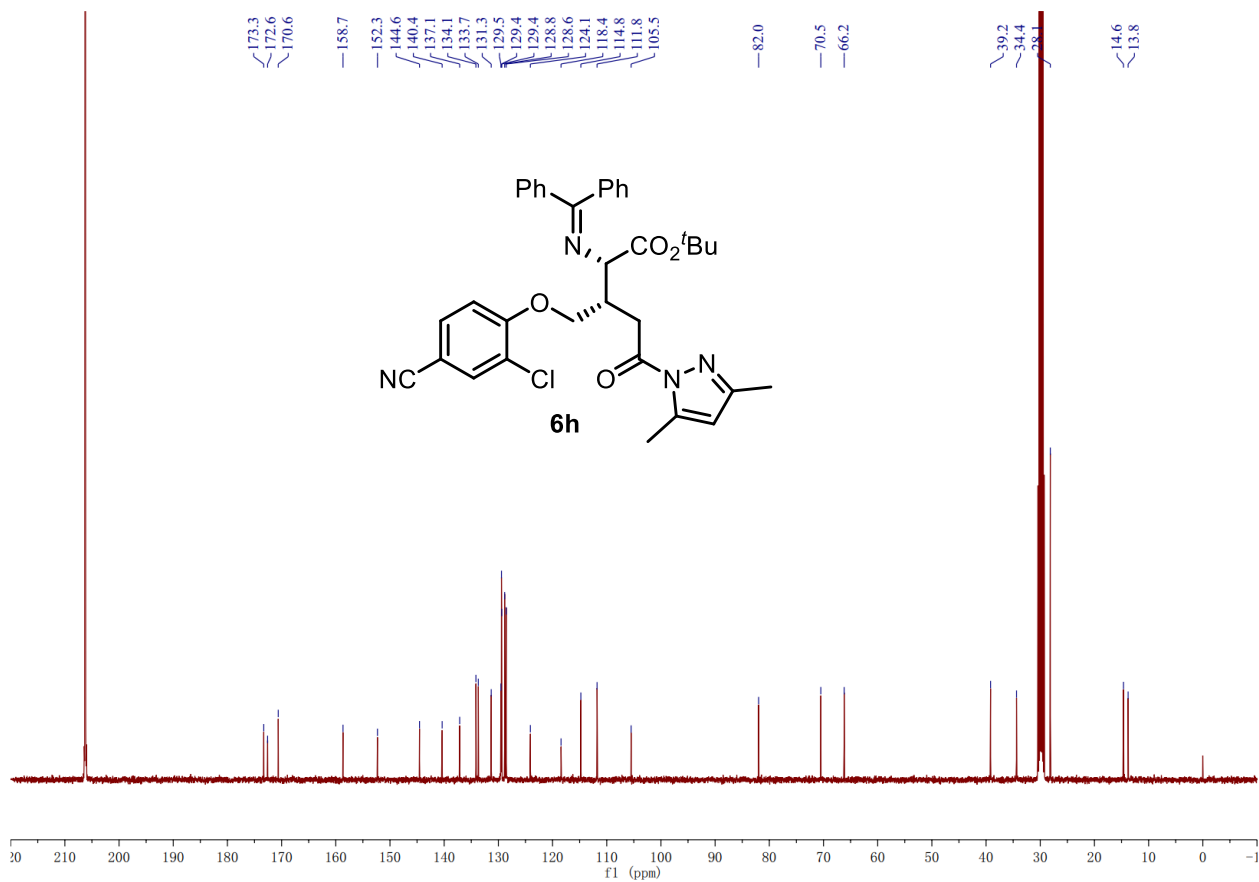

7.62  
7.61  
7.60  
7.59  
7.49  
7.48  
7.47  
7.47  
7.42  
7.40  
7.40  
7.37  
7.36  
7.36  
7.35  
7.35  
7.34  
7.33  
7.16  
7.16  
7.15  
7.15  
7.15  
7.14  
7.14  
7.13  
7.12  
7.12  
7.12  
7.10  
7.08  
6.61  
6.60  
6.58  
6.58  
6.57  
6.57  
6.03  
4.37  
4.35  
4.35  
4.14  
4.13  
4.12  
4.11  
4.00  
3.98  
3.97  
3.95  
3.66  
3.65  
3.62  
3.61  
3.46  
3.44  
3.42  
3.40  
3.37  
3.36  
3.36  
3.35  
3.34  
3.33  
3.32  
3.32  
2.49  
2.49  
2.17  
2.14  
2.14  
1.41

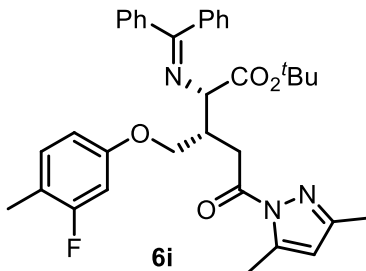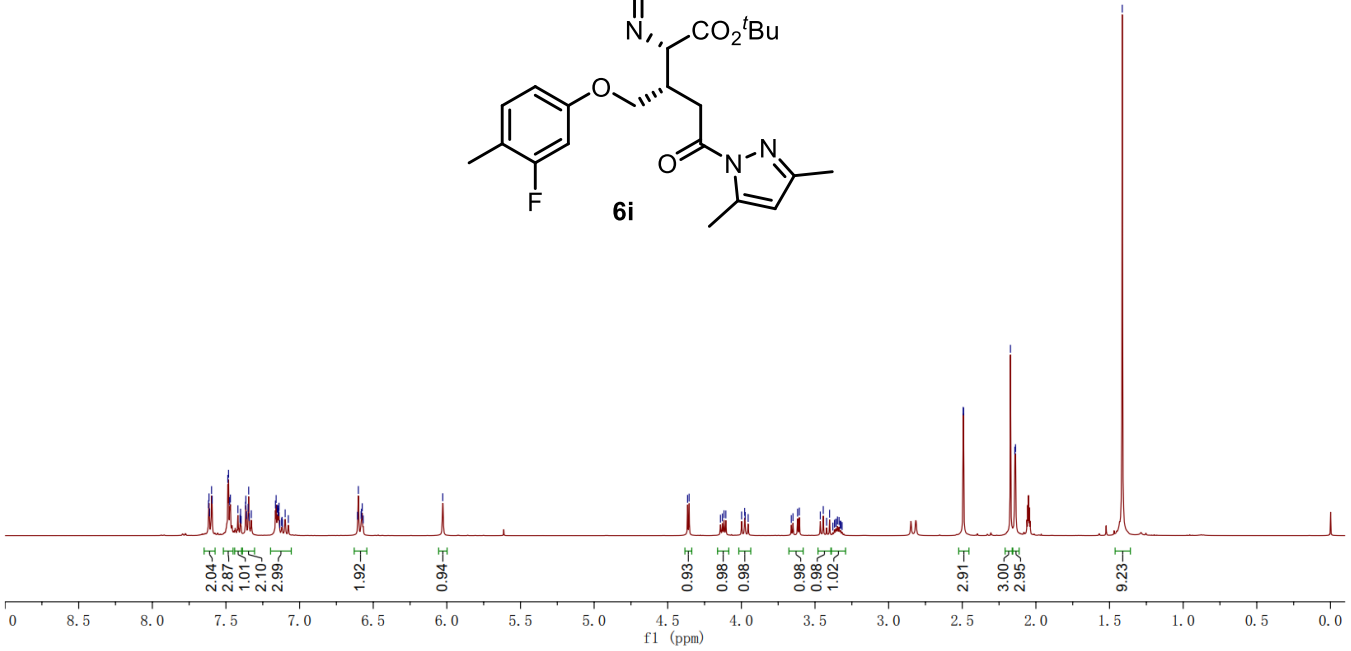

173.4  
172.3  
170.8  
163.5  
161.1  
159.1  
159.0  
152.2  
144.5  
140.4  
137.4  
132.5  
132.4  
131.3  
129.5  
129.4  
129.3  
128.9  
128.6  
117.0  
116.9  
111.8  
111.1  
111.1  
102.7  
102.5  
81.8  
69.1  
66.2  
39.1  
34.4  
28.2  
14.6  
13.8  
13.7  
13.7

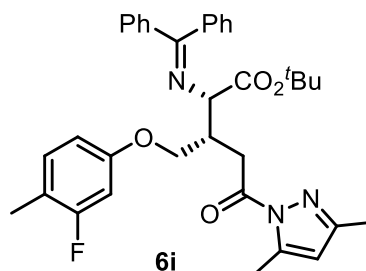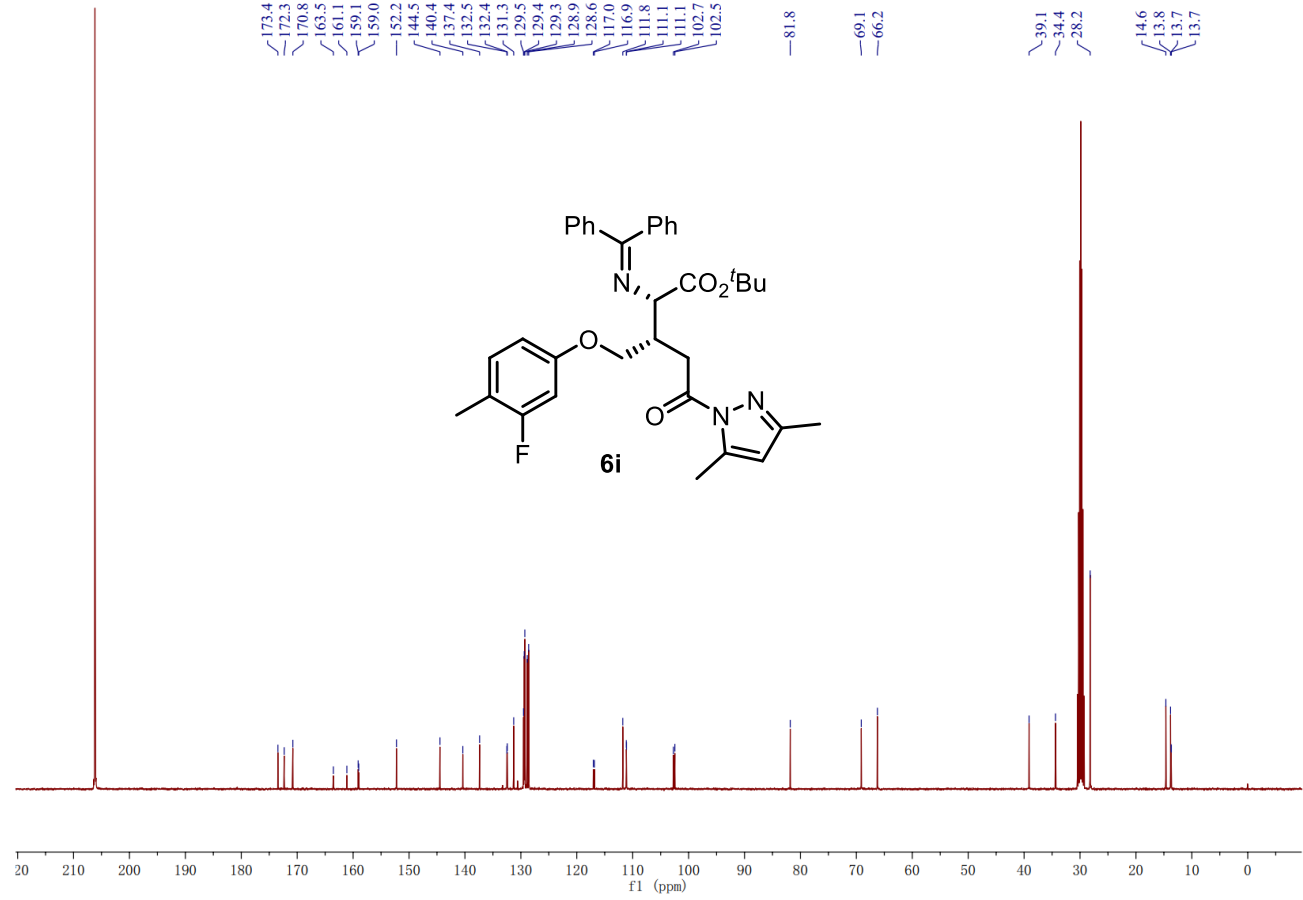

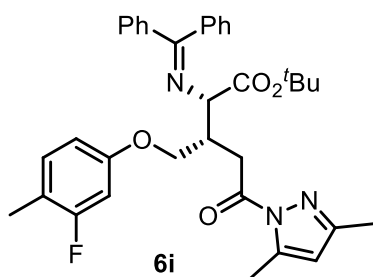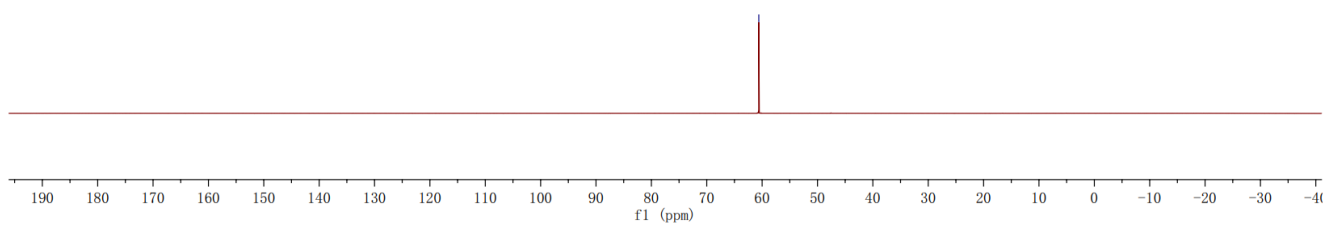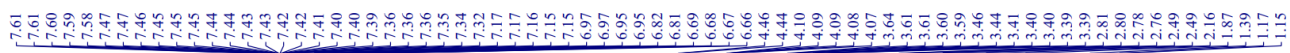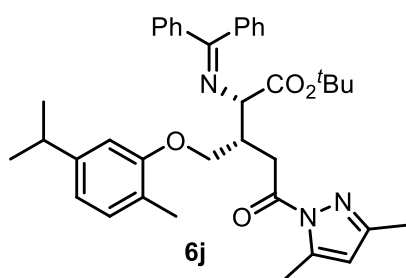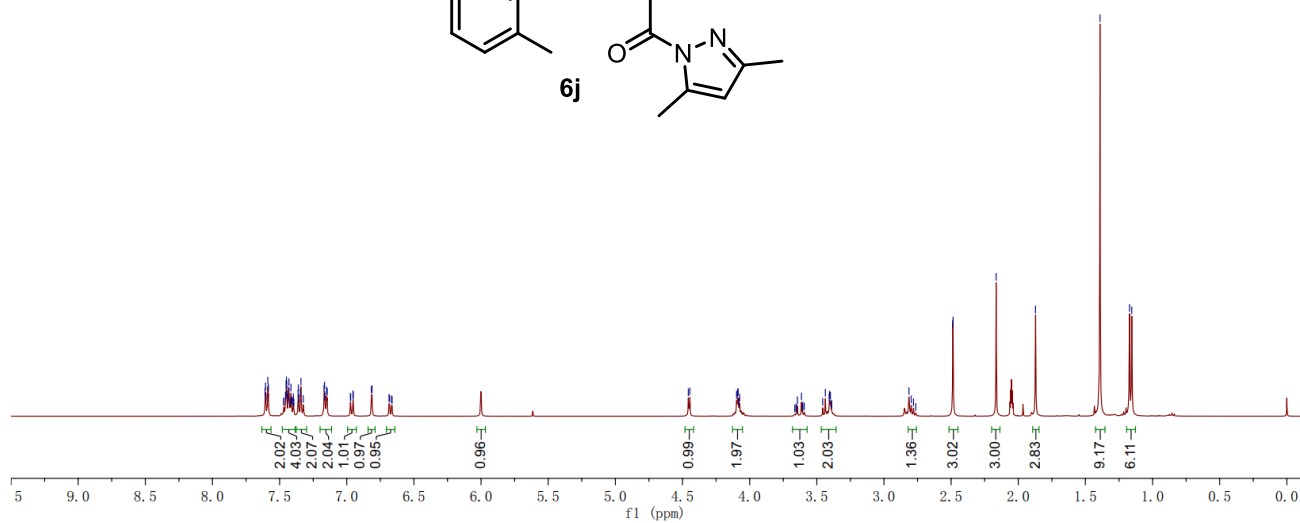

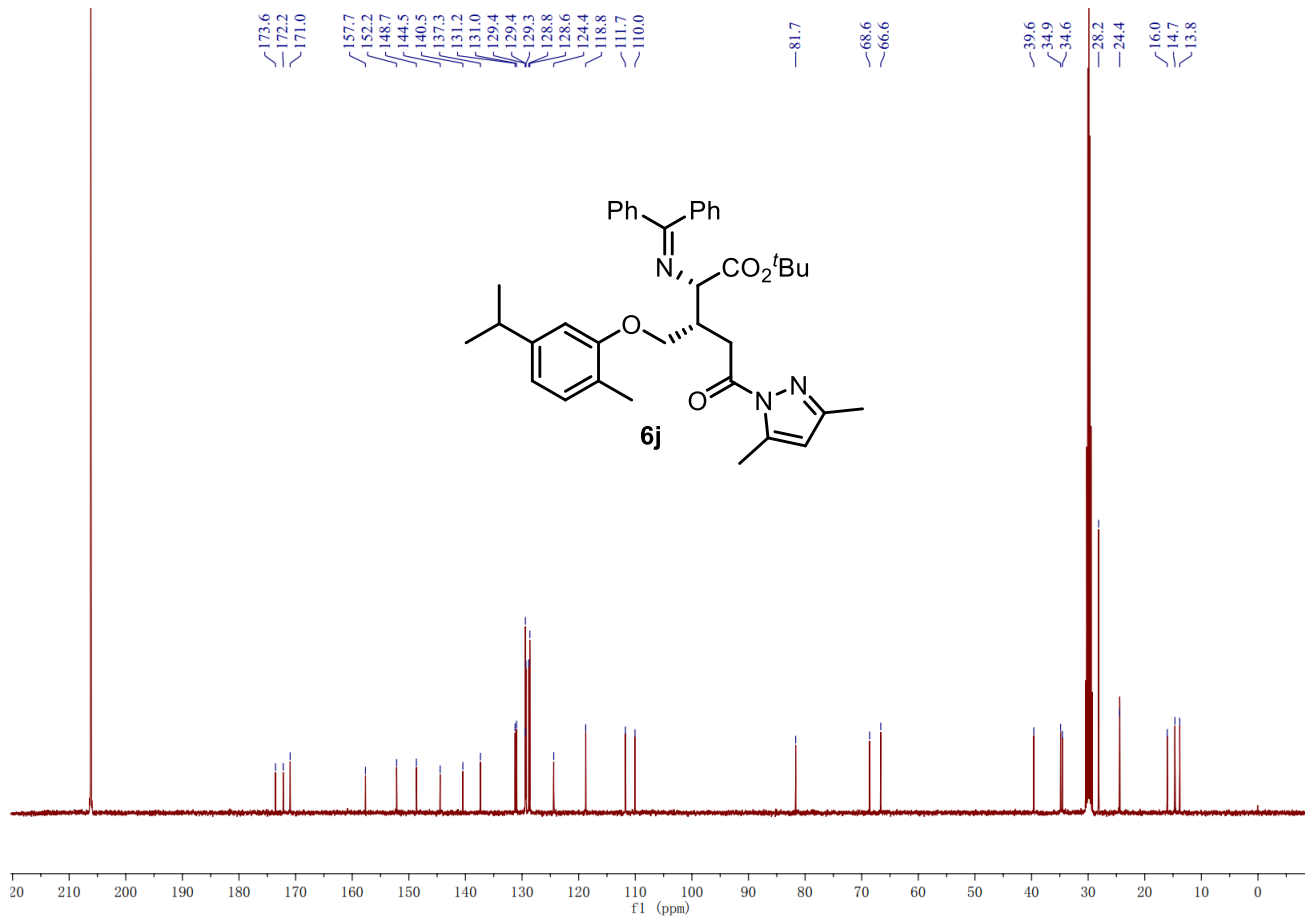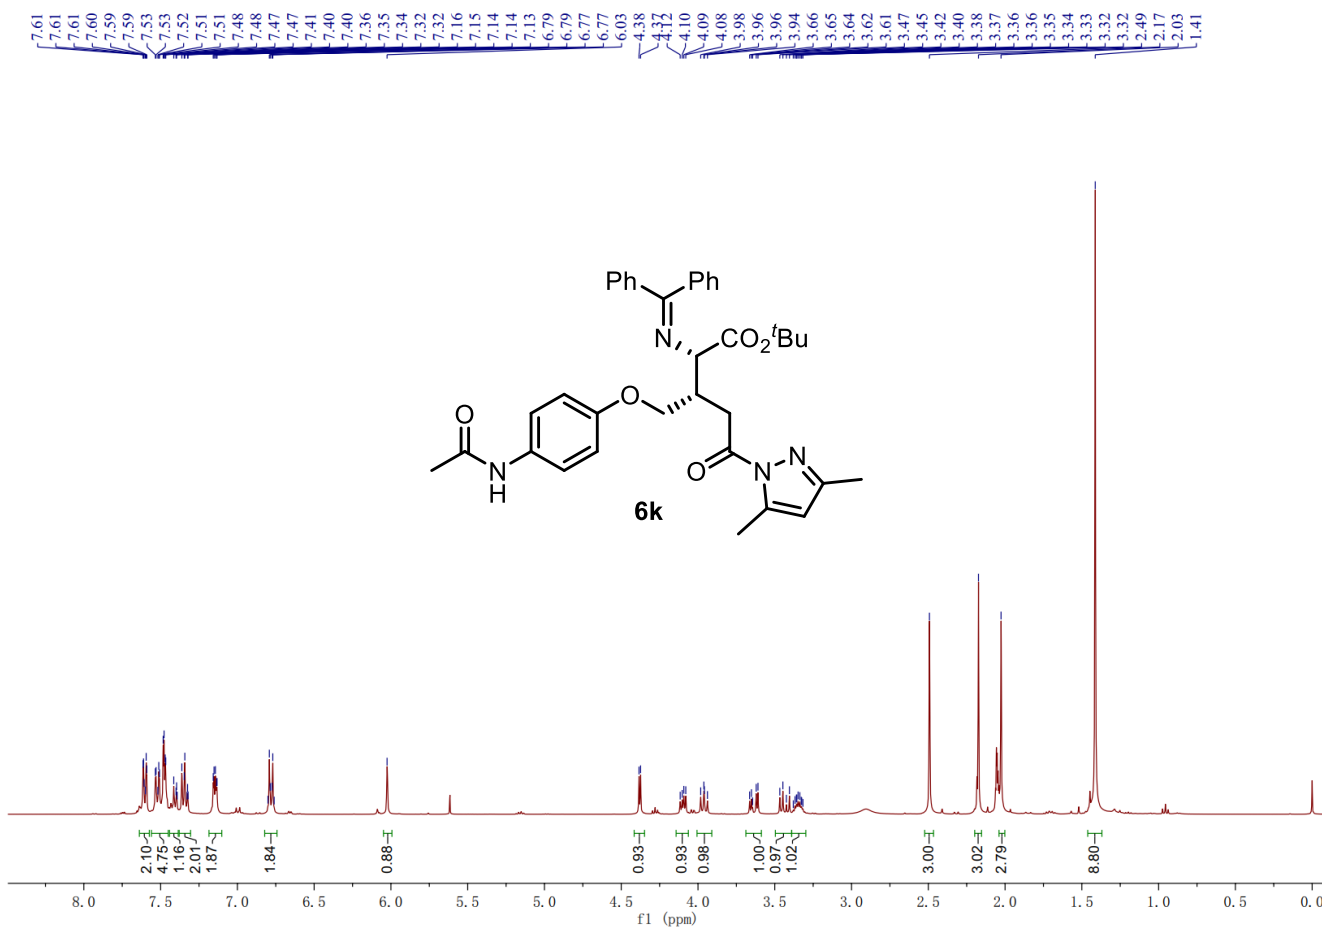

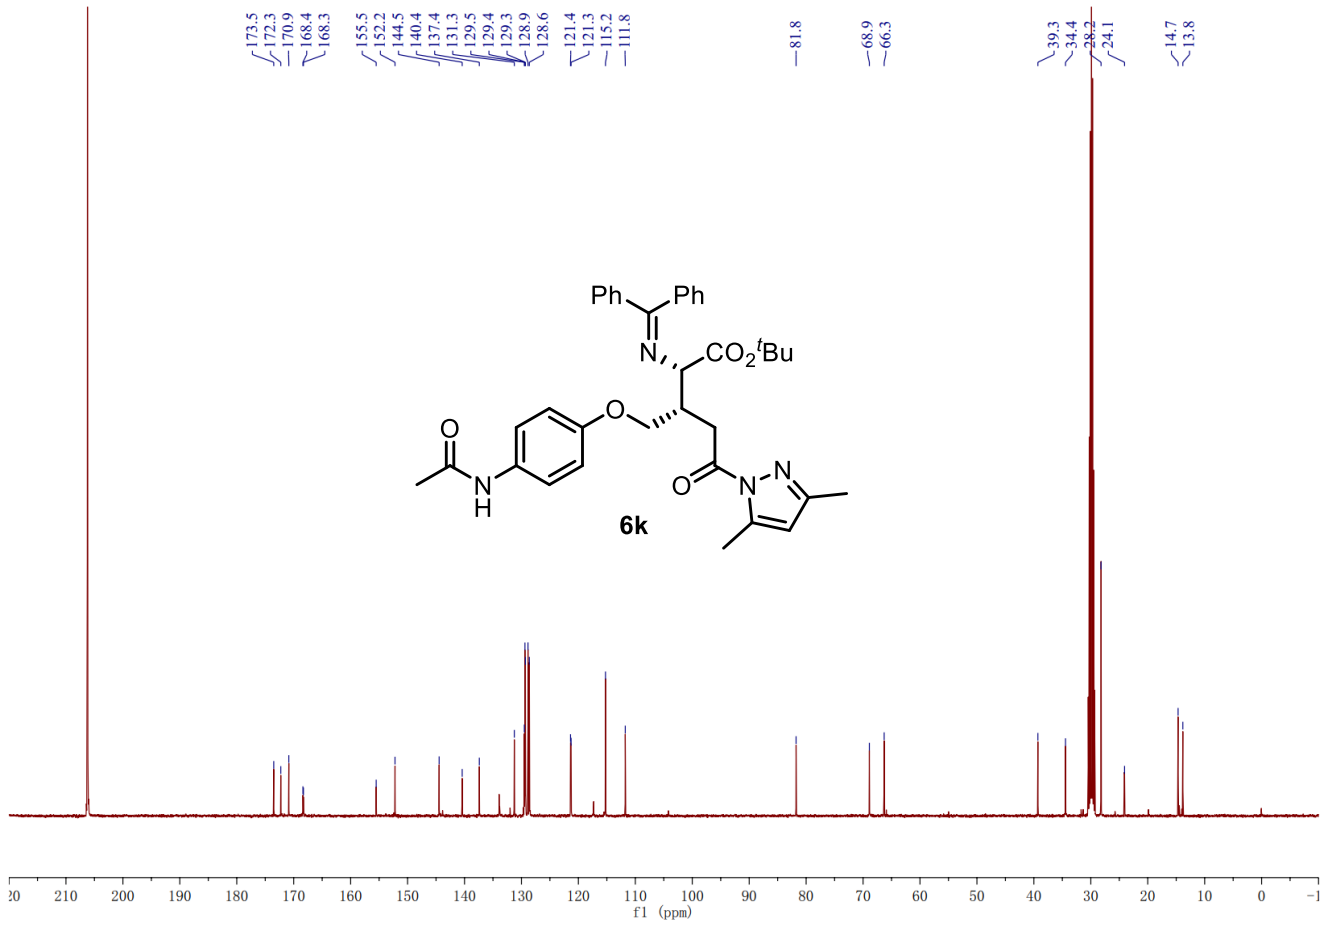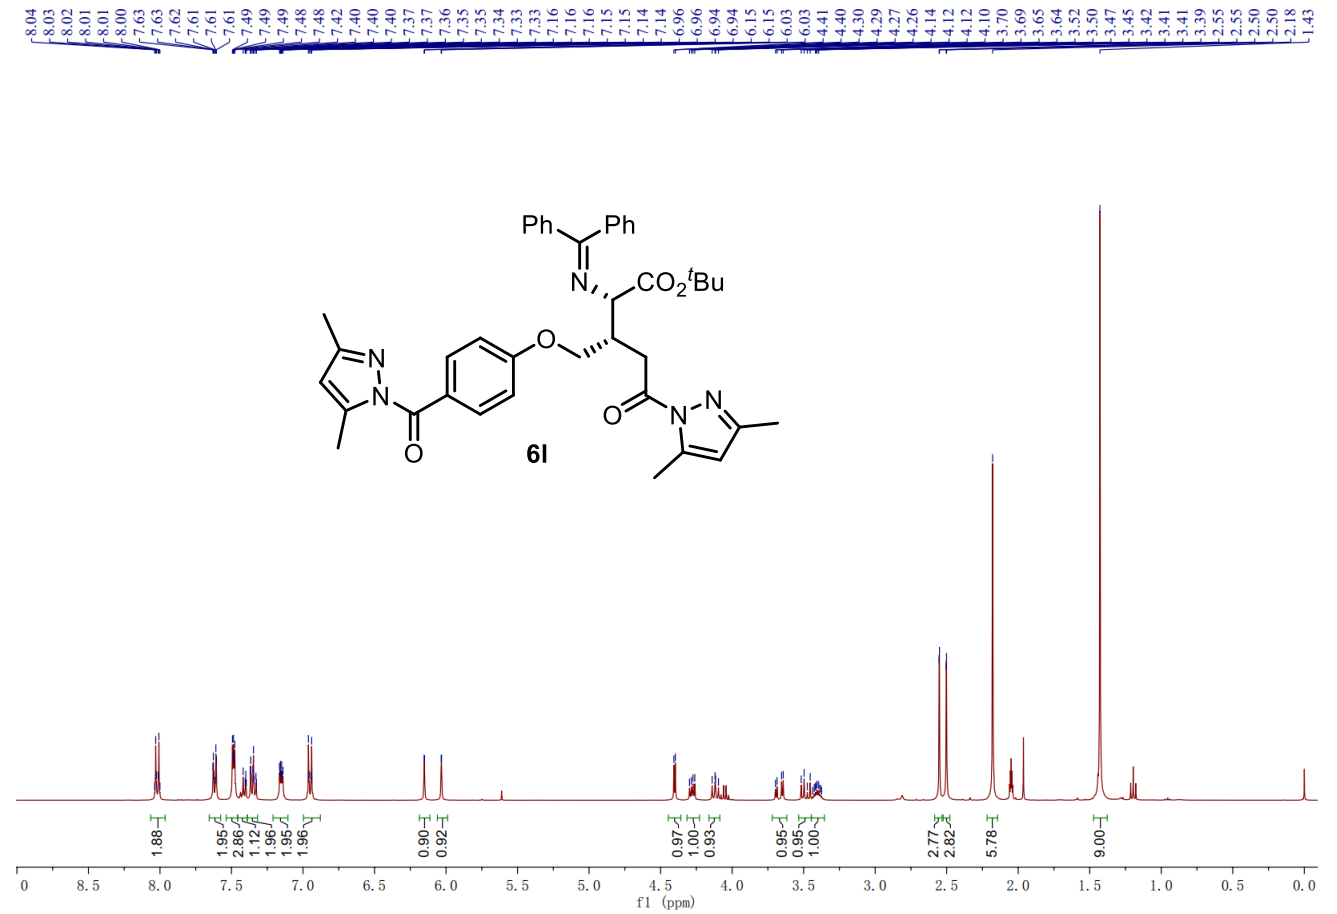

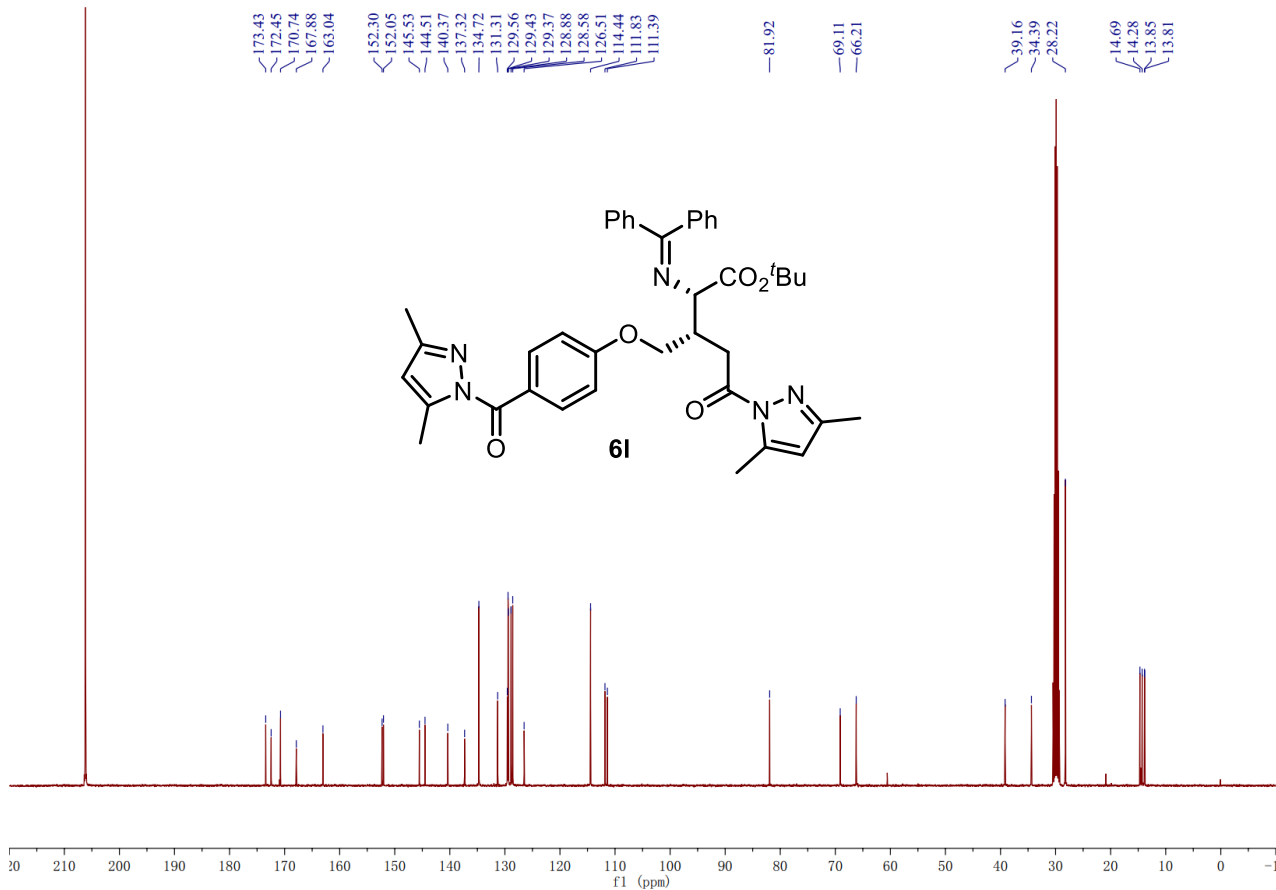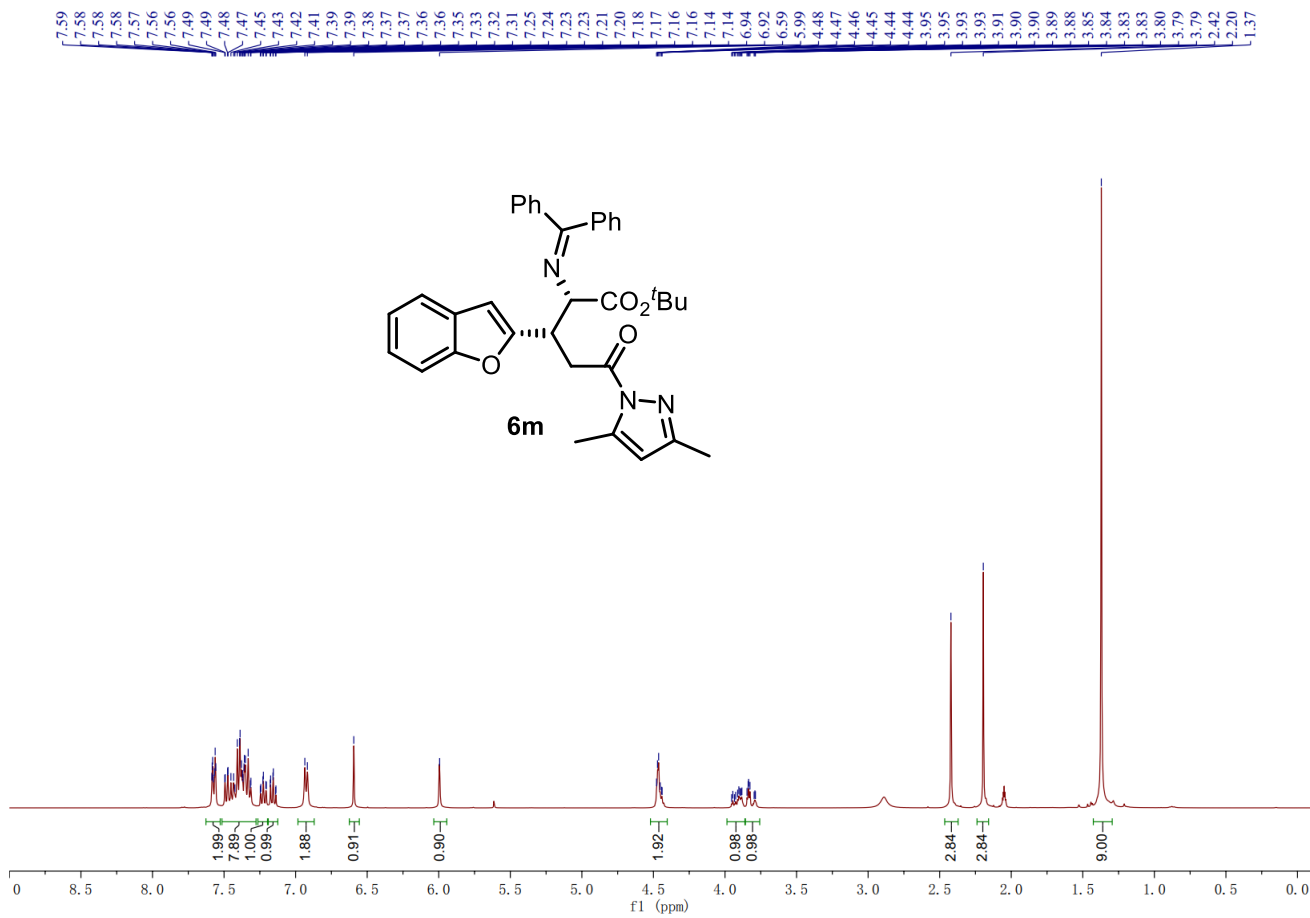



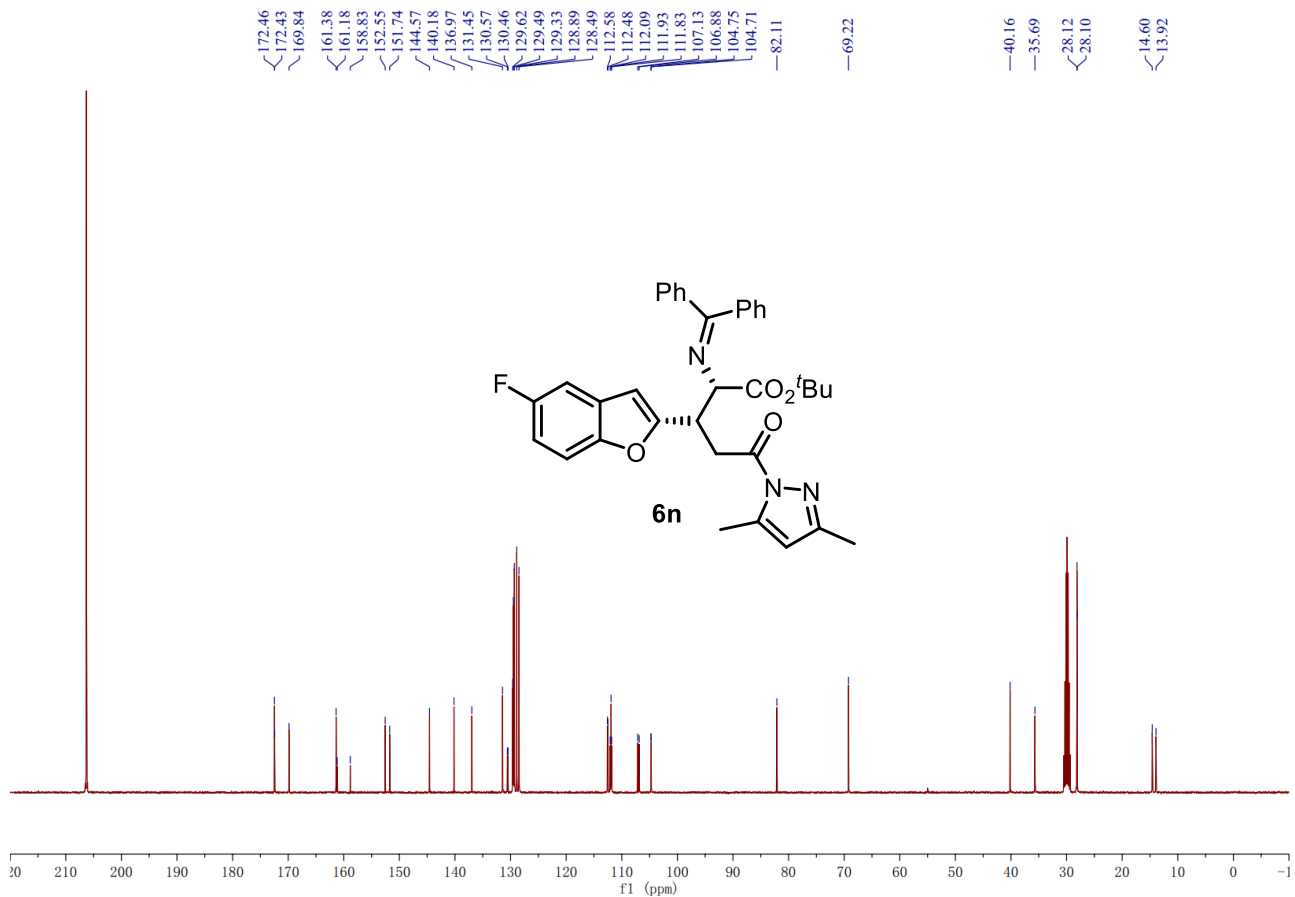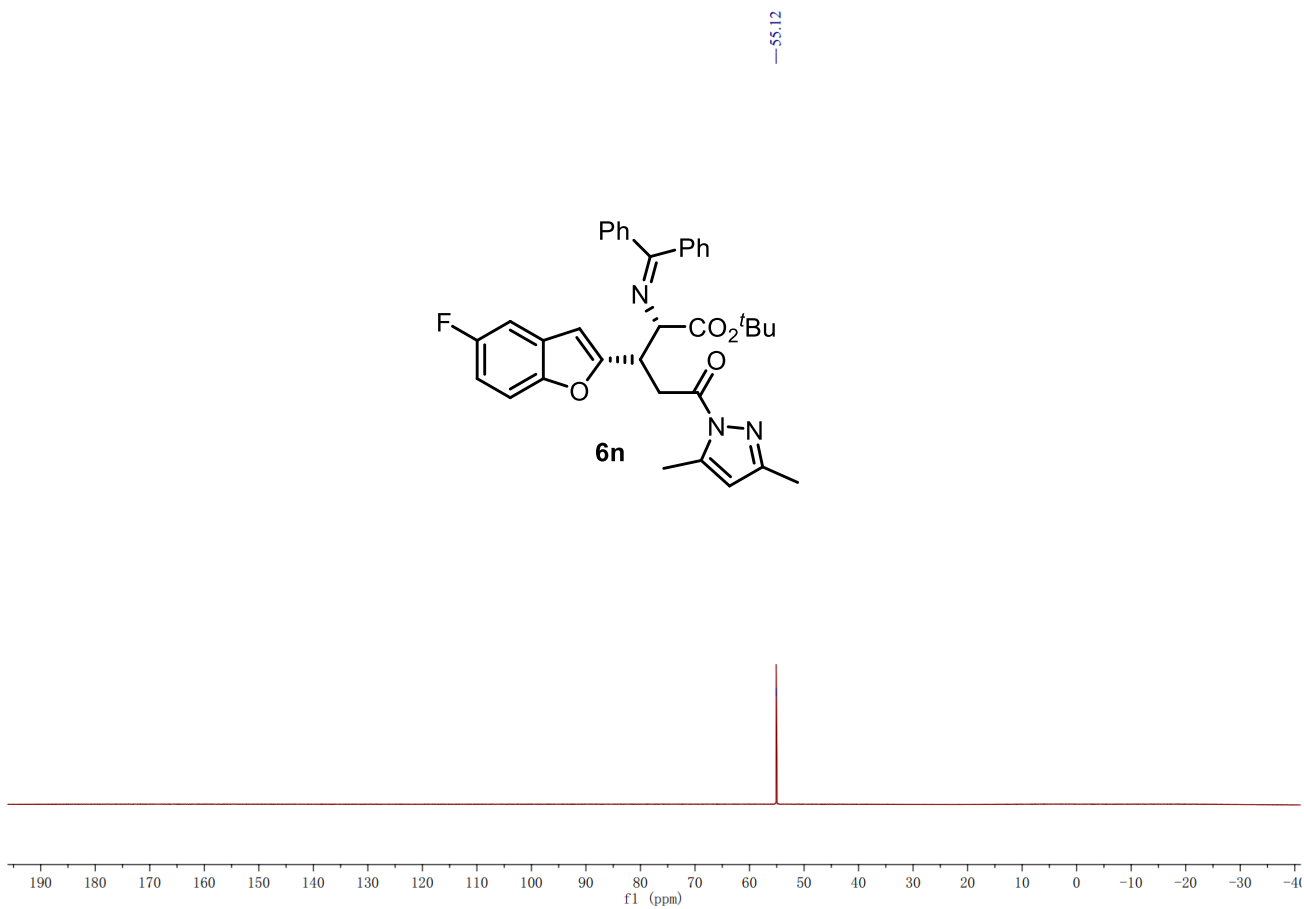

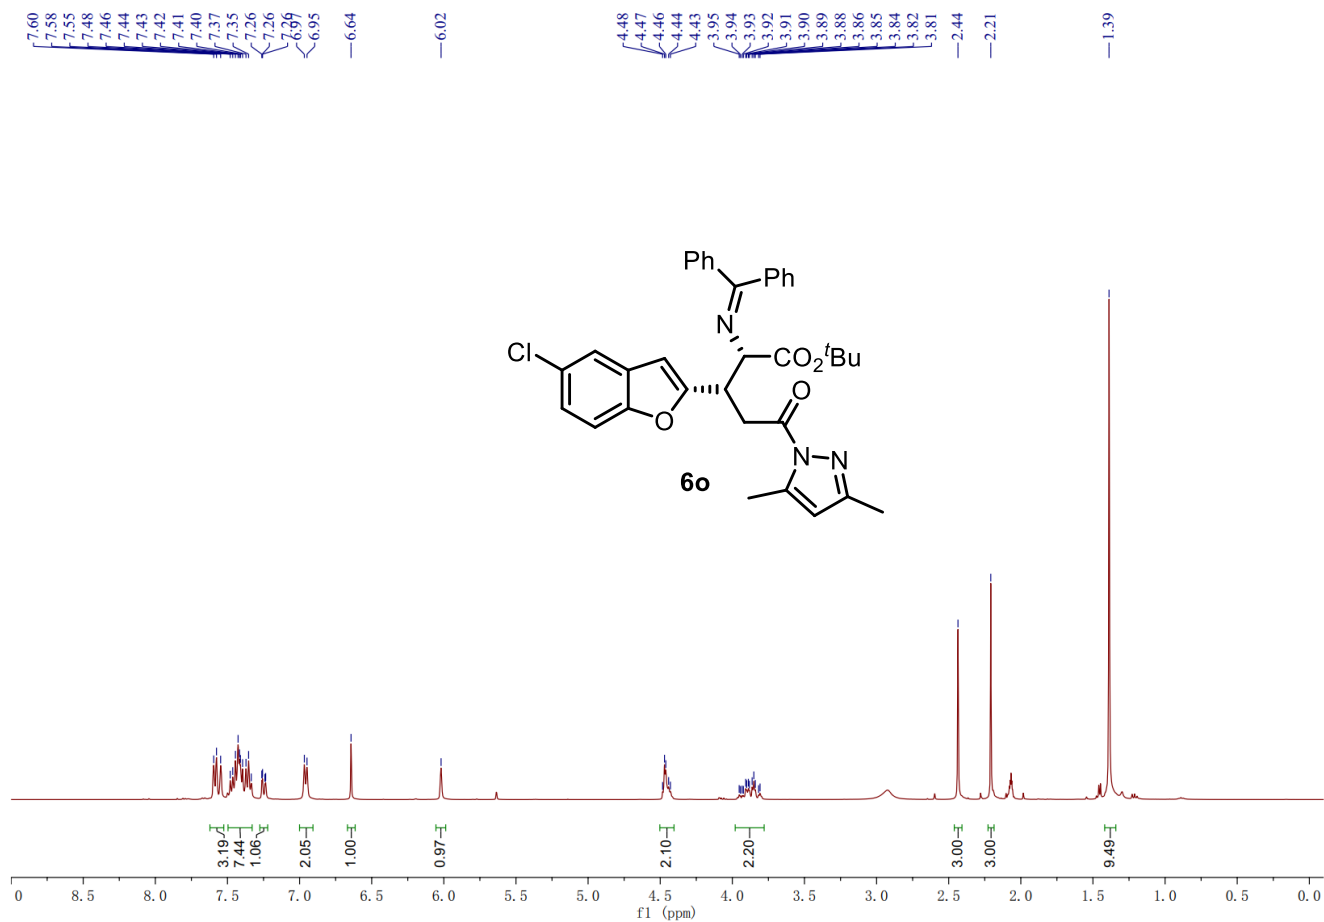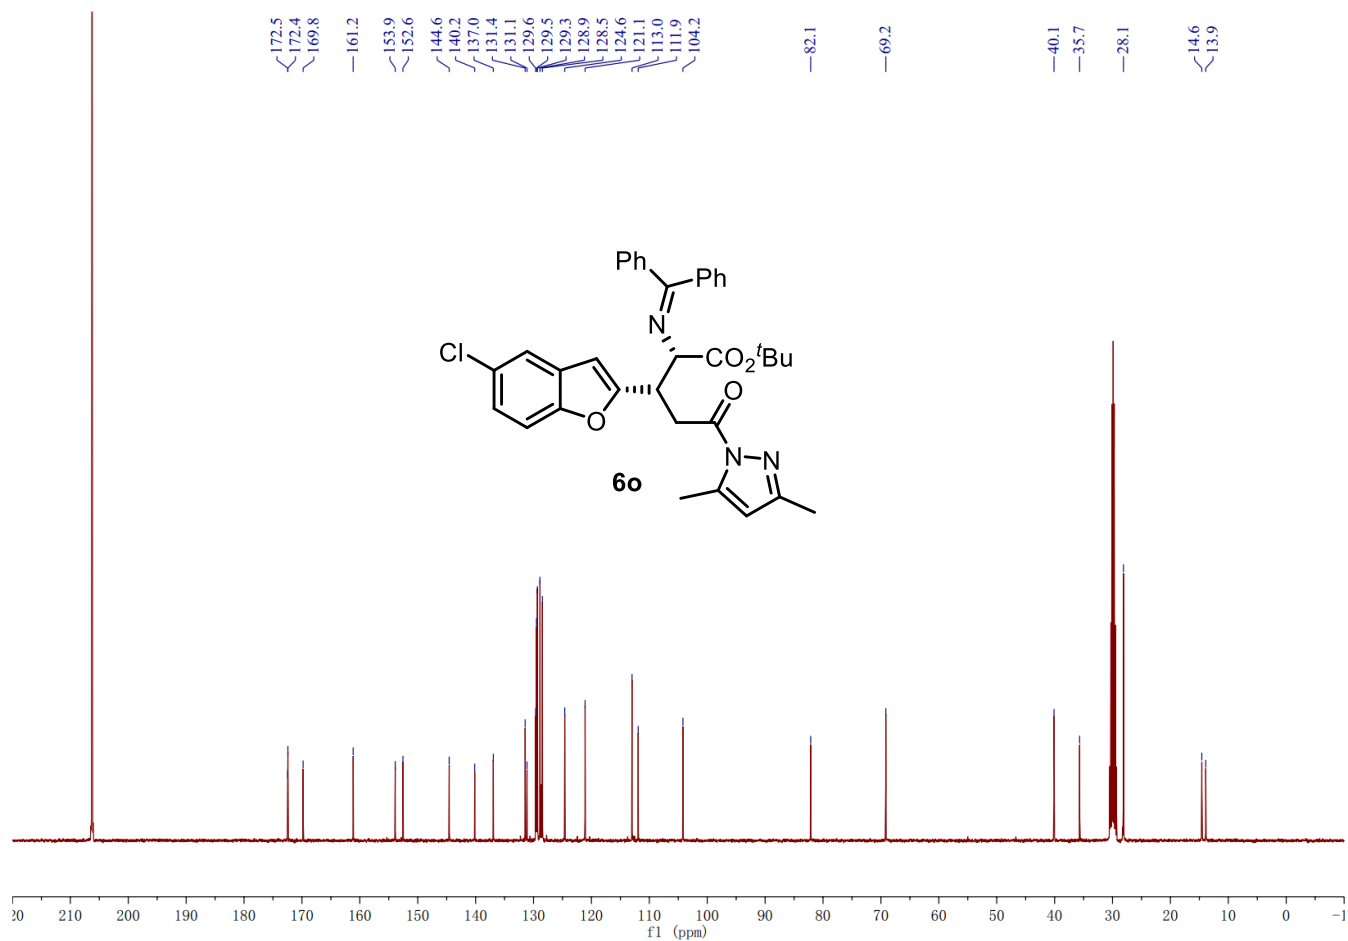



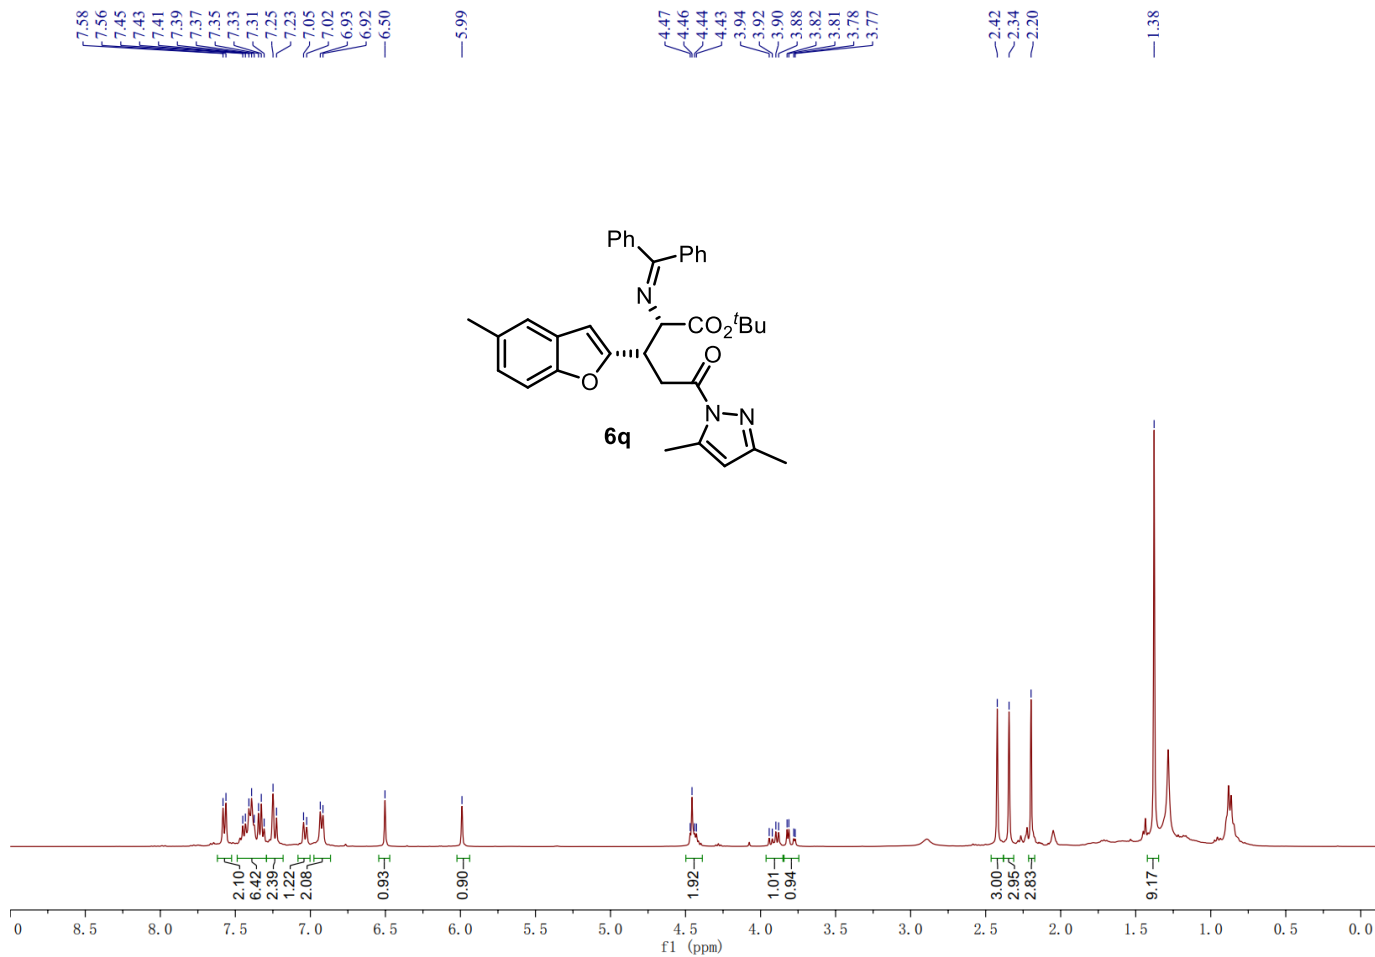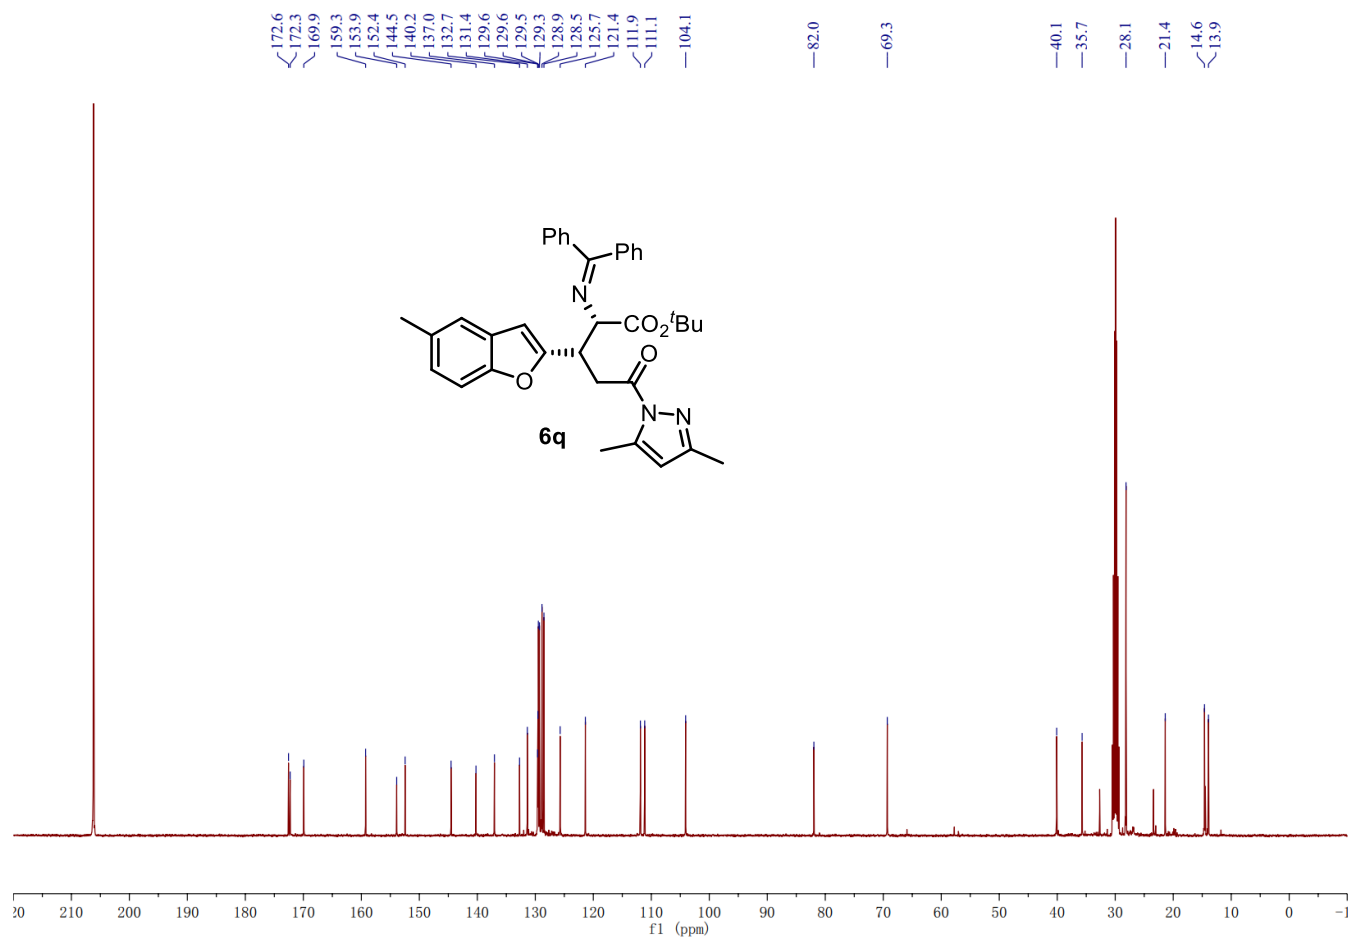

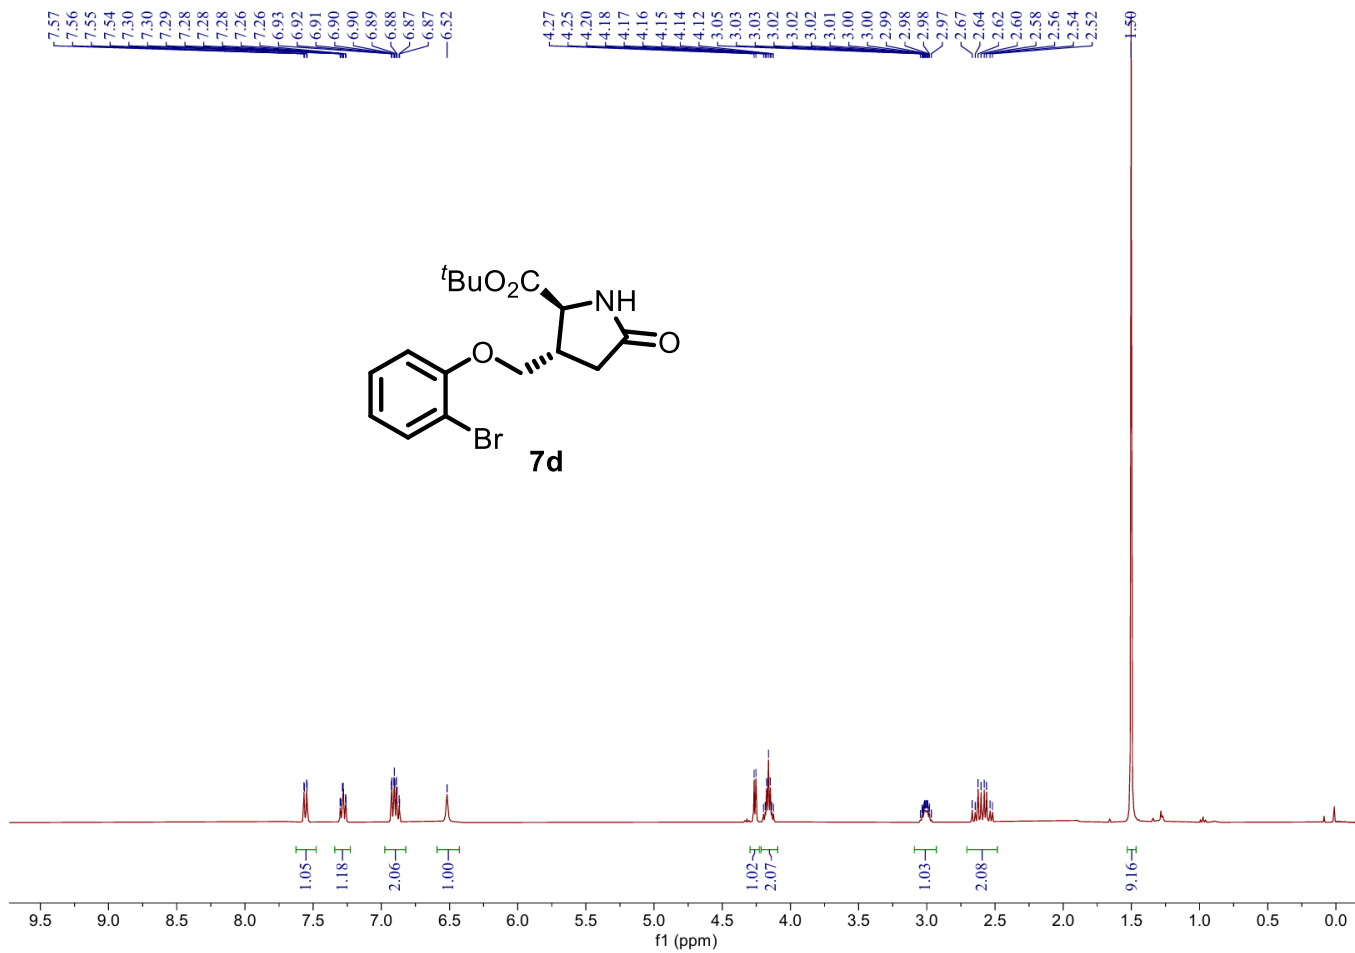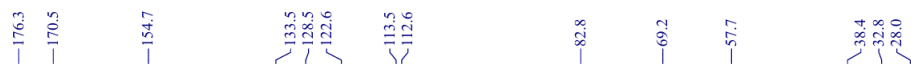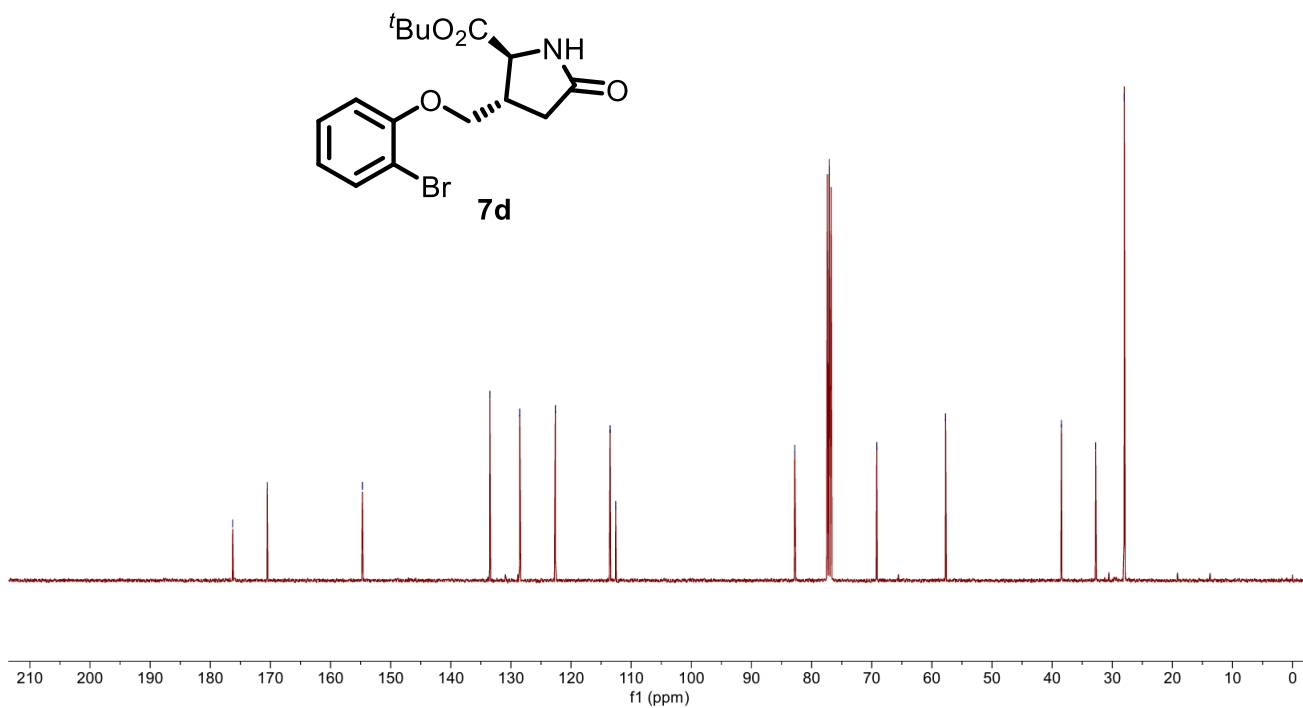

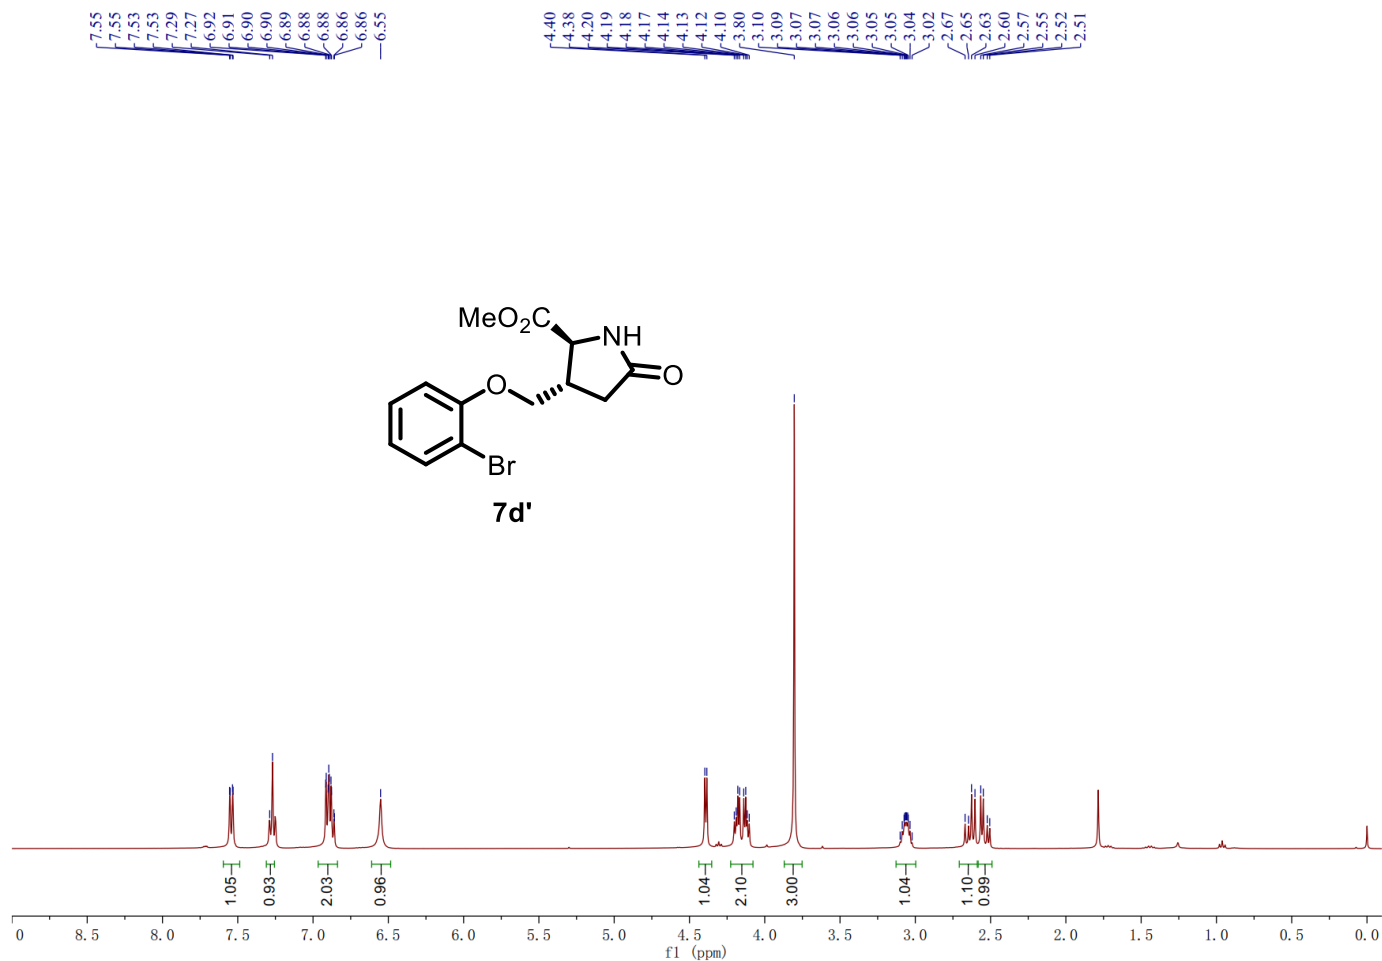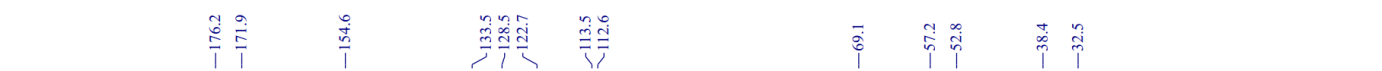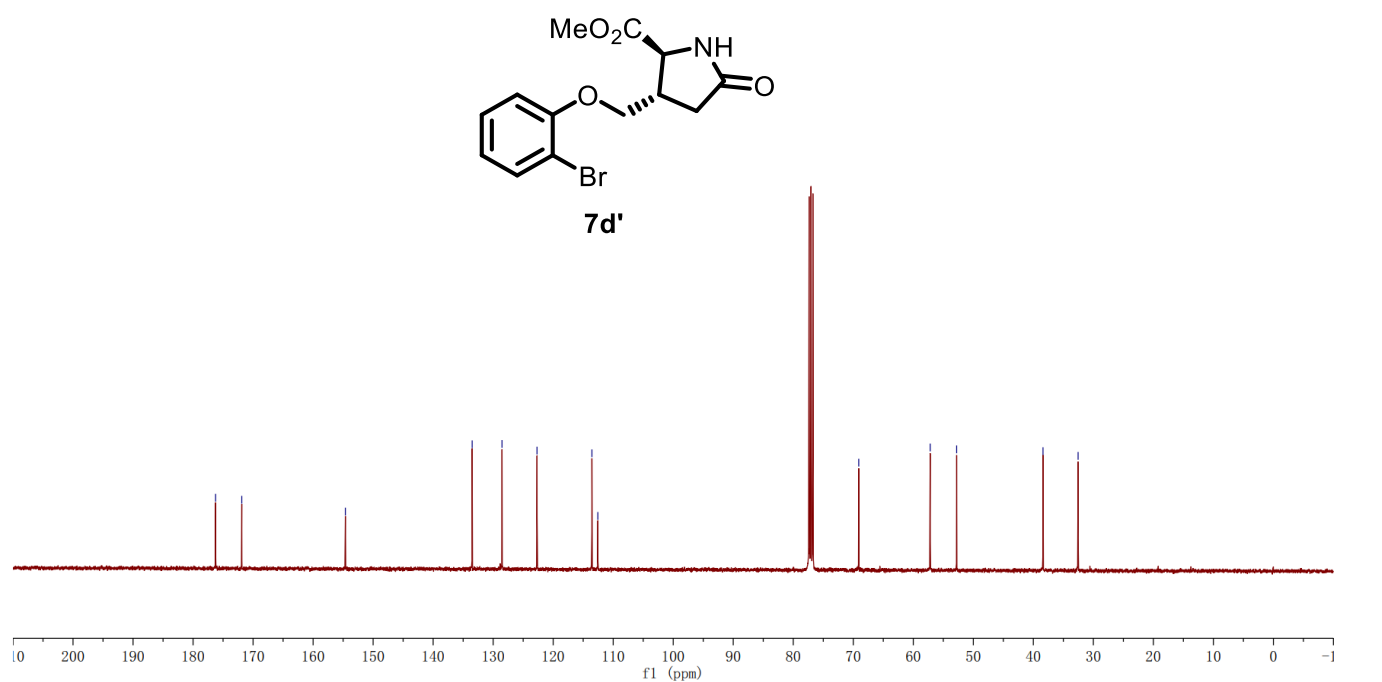

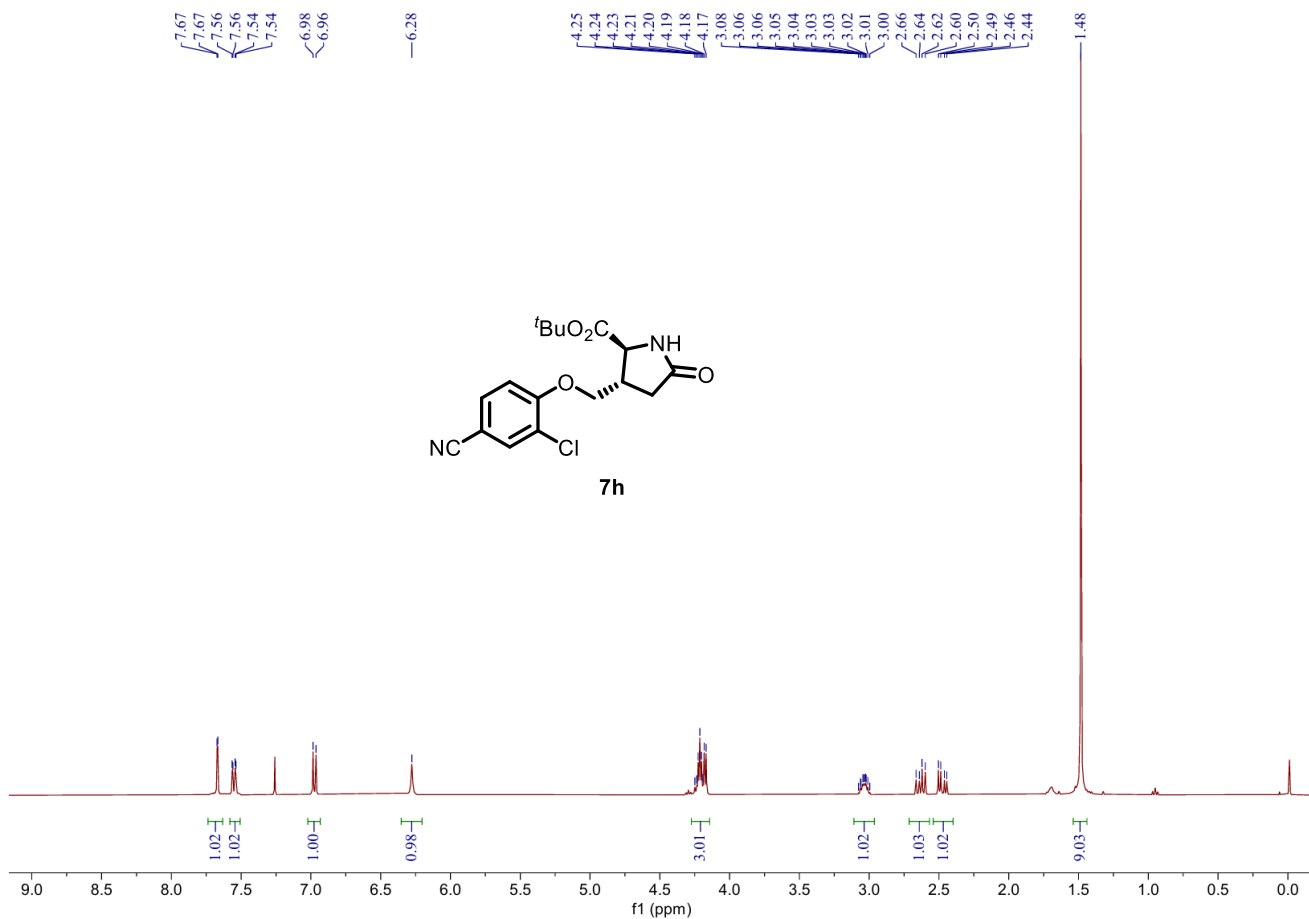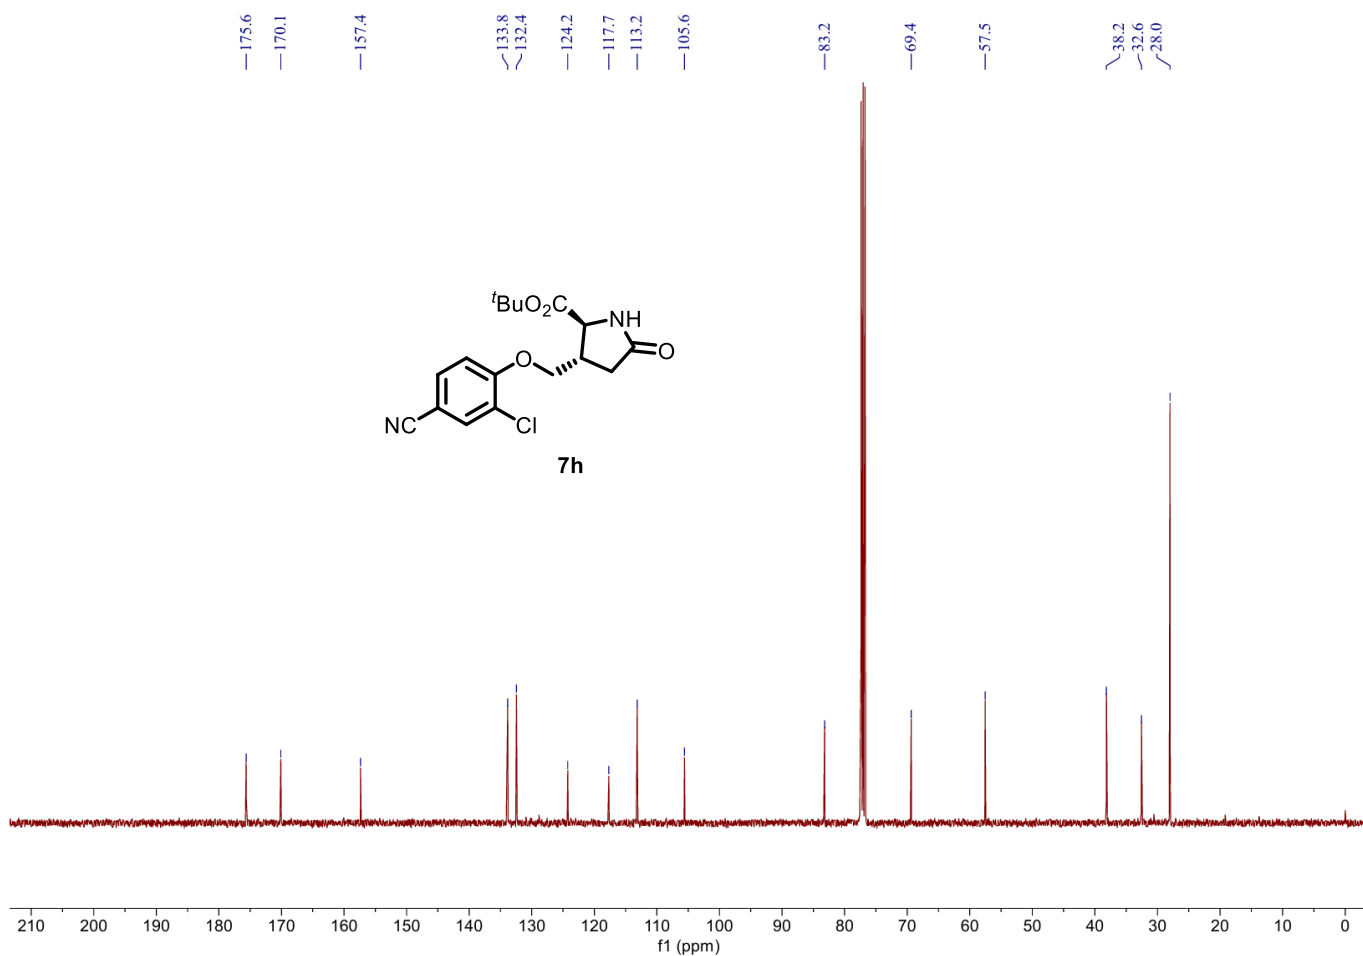

## 5. HRMS scanning copies

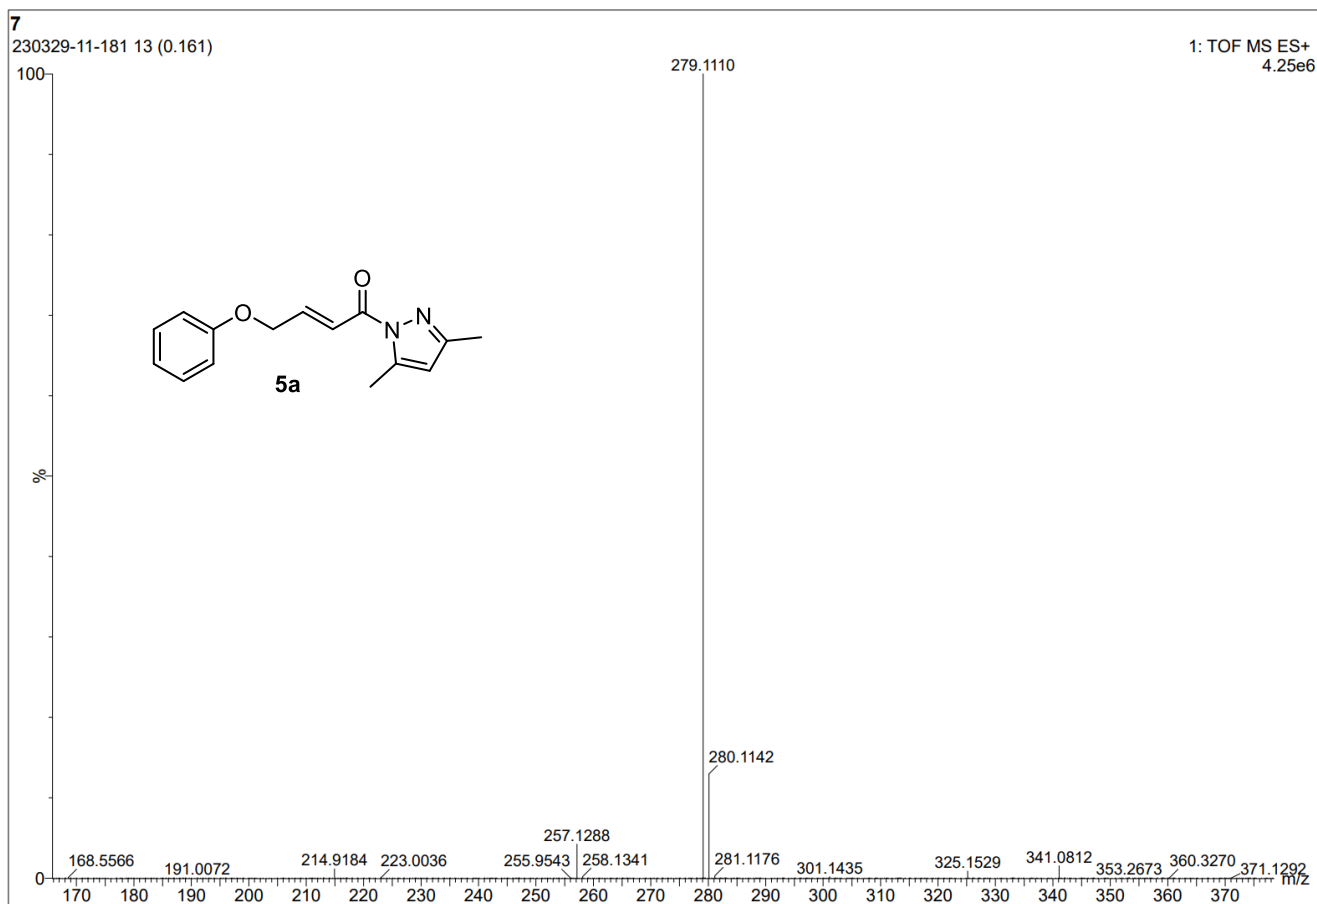

Spectrum from WPA-2024.wiff2 (sample 1) - 350, +TOF MS (50 - 2000) from 0.245 min

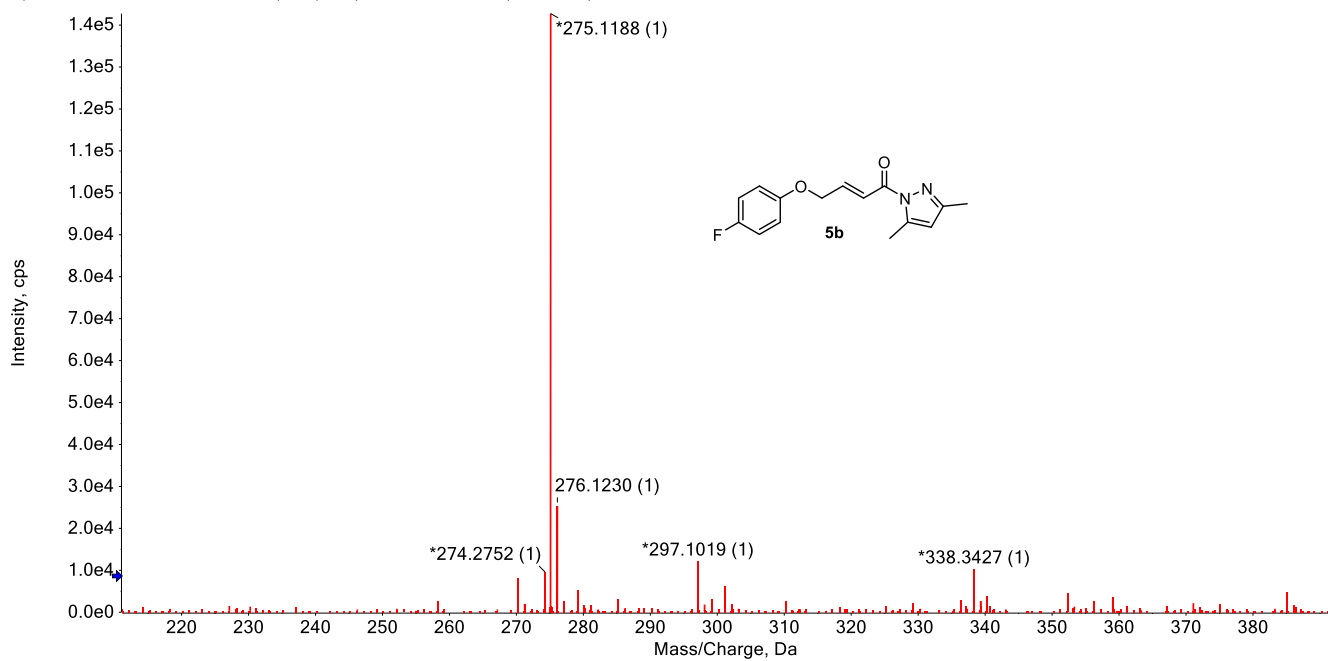

Spectrum from WPA-2024.wiff2 (sample 18) - 366, +TOF MS (50 - 2000) from 0.287 min

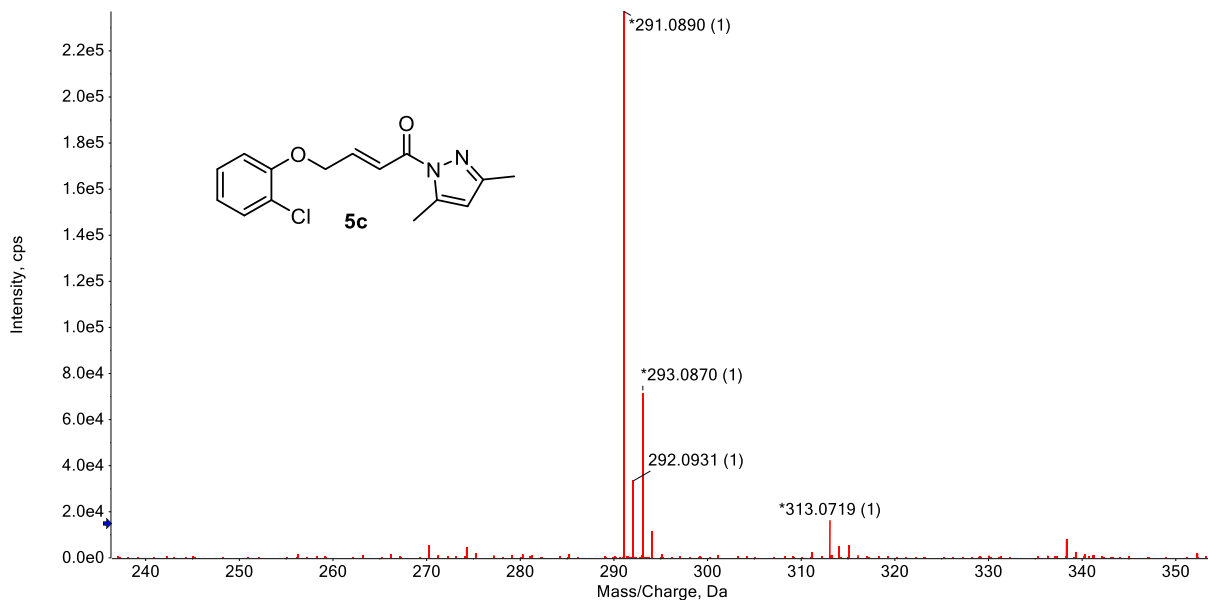

Spectrum from WPA-2024.wiff2 (sample 7) - 356, +TOF MS (50 - 2000) from 0.245 min

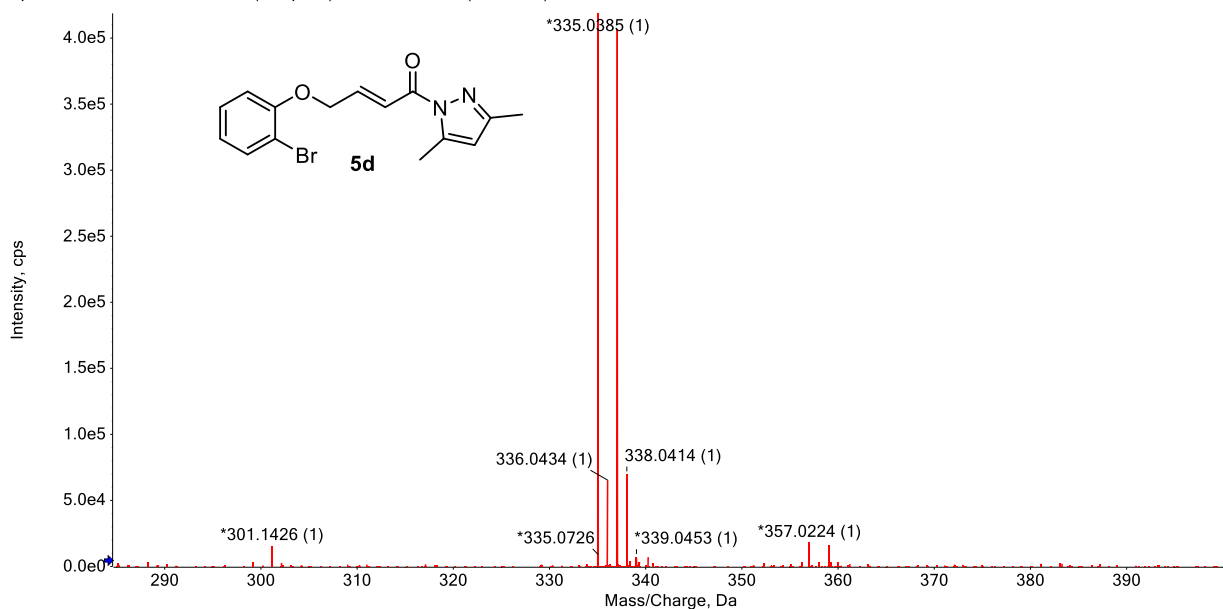

Spectrum from WPA-2024.wiff2 (sample 5) - 354, +TOF MS (50 - 2000) from 0.310 min

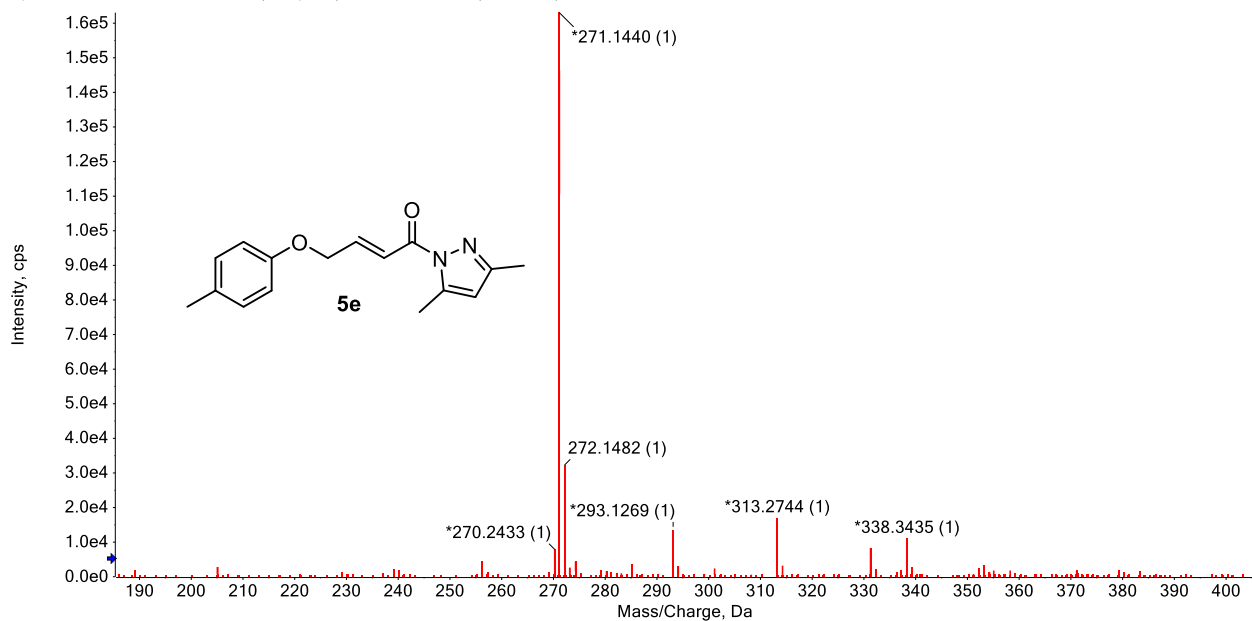

Spectrum from WPA-2024.wiff2 (sample 9) - 358, +TOF MS (50 - 2000) from 0.301 min

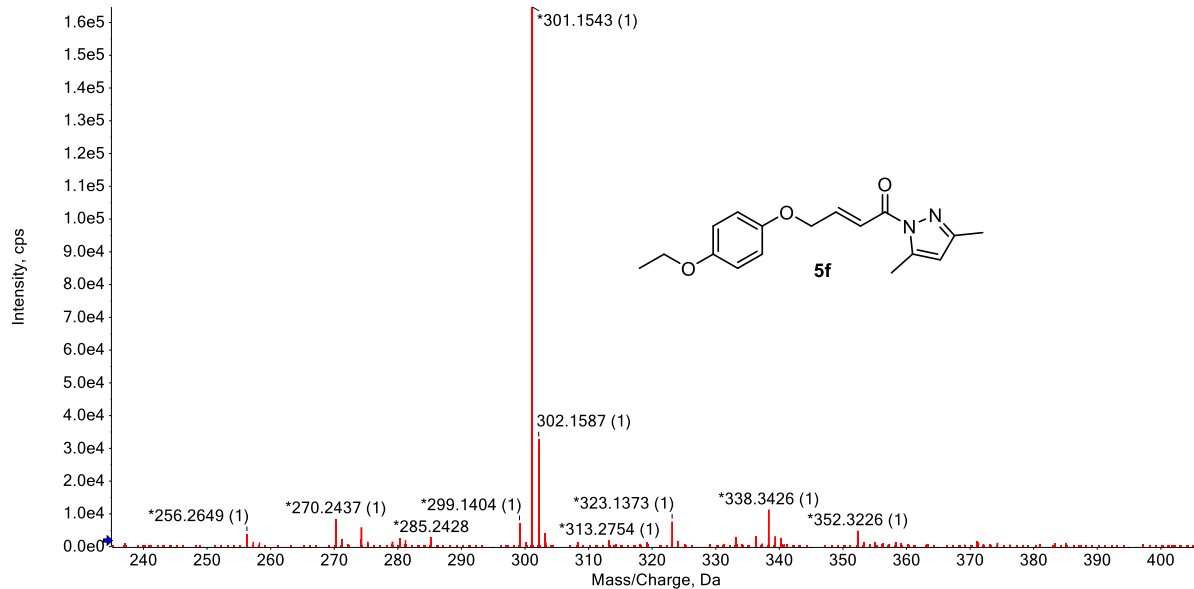

Spectrum from WPA-2024.wiff2 (sample 25) - 373, +TOF MS (50 - 2000) from 0.273 min

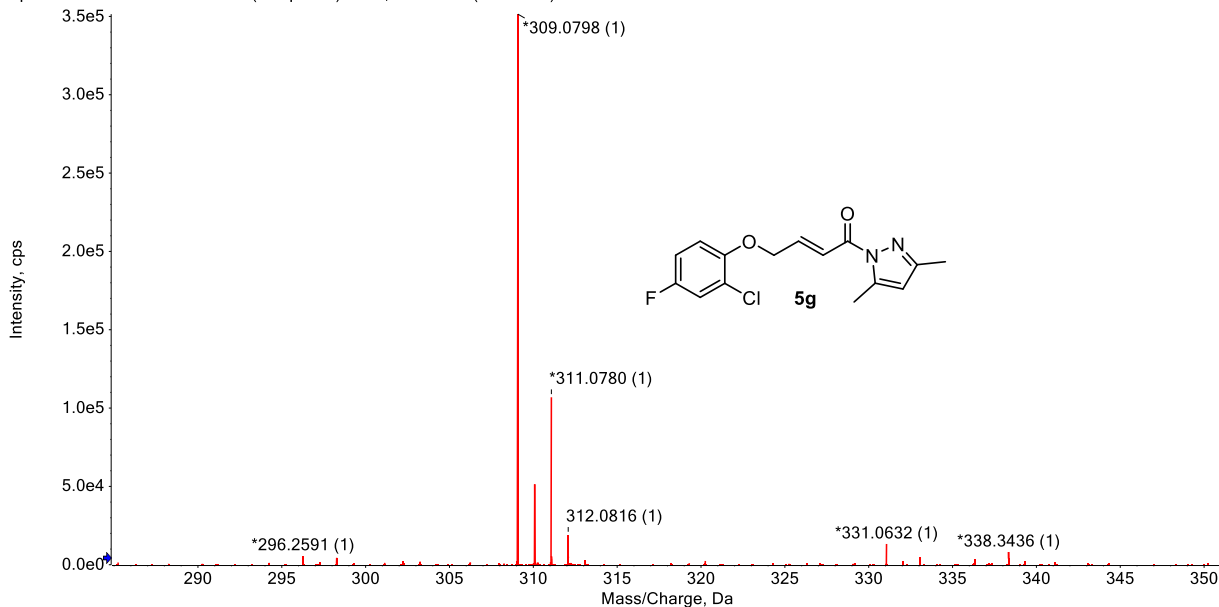

Spectrum from WPA-2024.wiff2 (sample 13) - 362, +TOF MS (50 - 2000) from 0.310 min

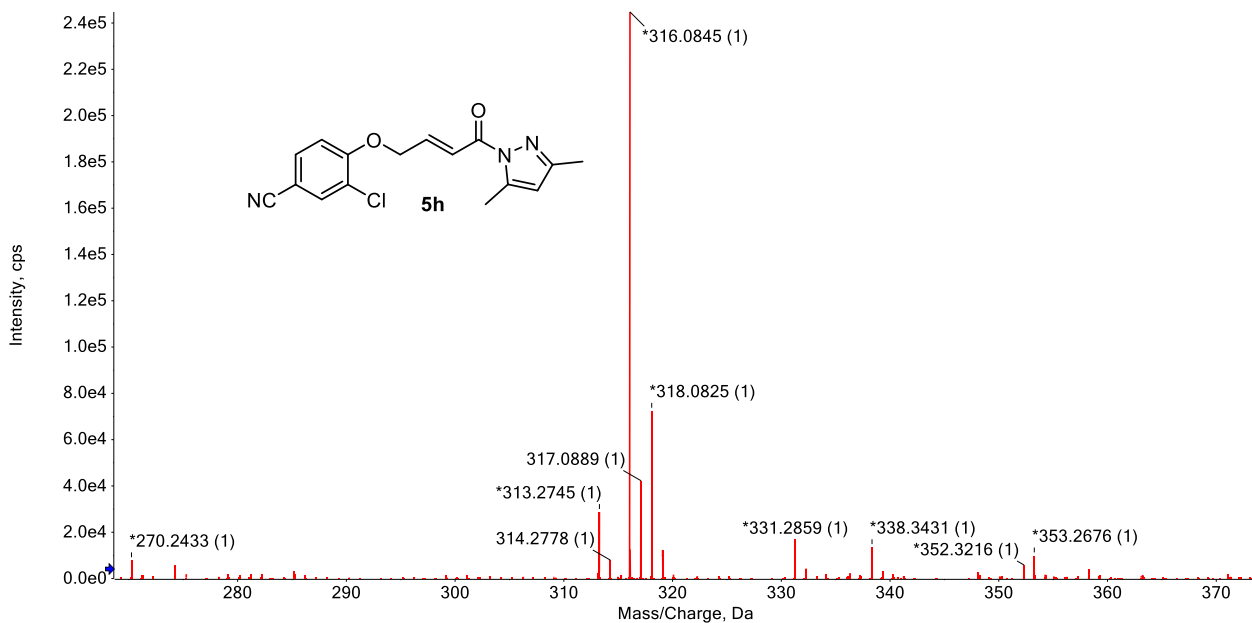

Spectrum from WPA-2024.wiff2 (sample 20) - 368, +TOF MS (50 - 2000) from 0.329 min

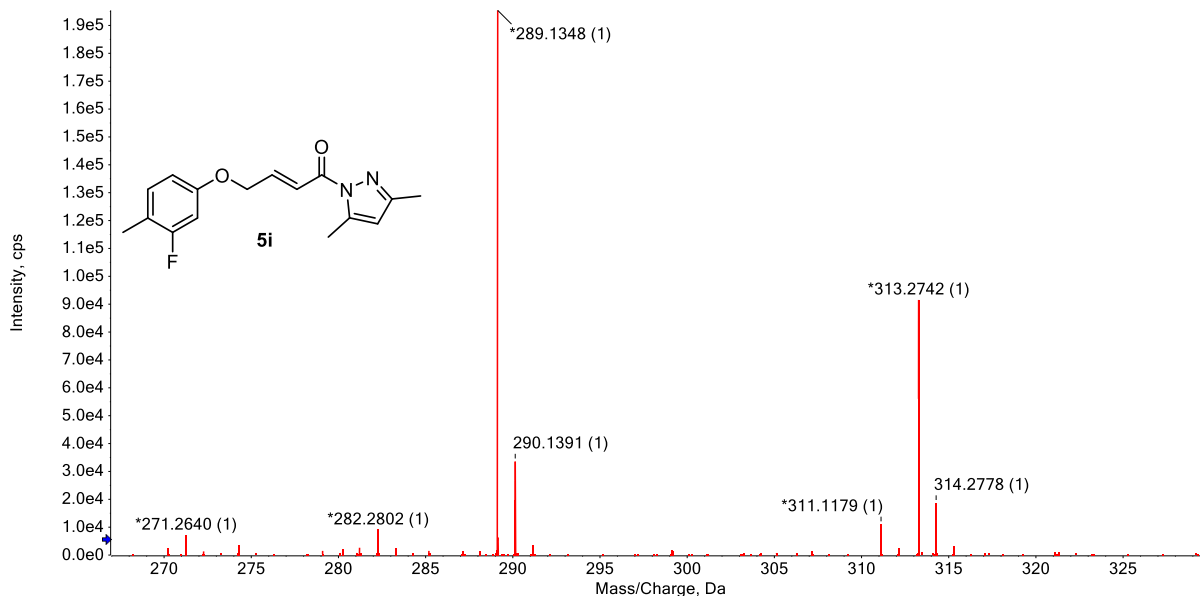

Spectrum from WPA-2024.wiff2 (sample 11) - 360, +TOF MS (50 - 2000) from 0.422 min

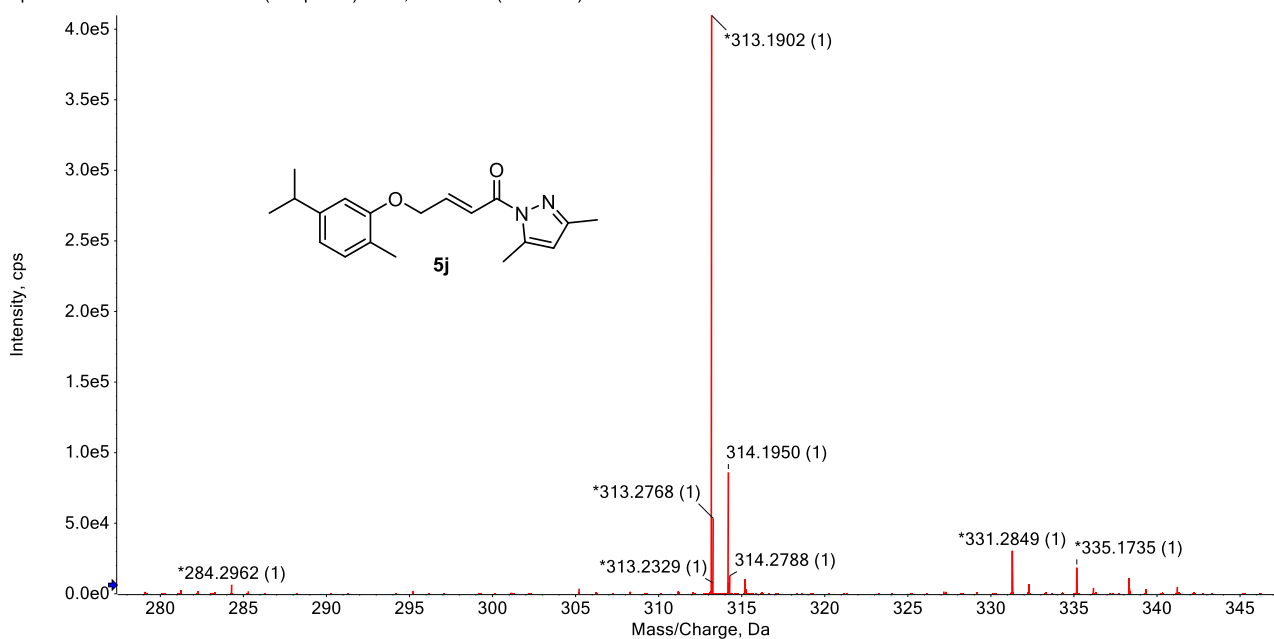

Spectrum from WPA-2024.wiff2 (sample 3) - 352, +TOF MS (50 - 2000) from 0.236 min

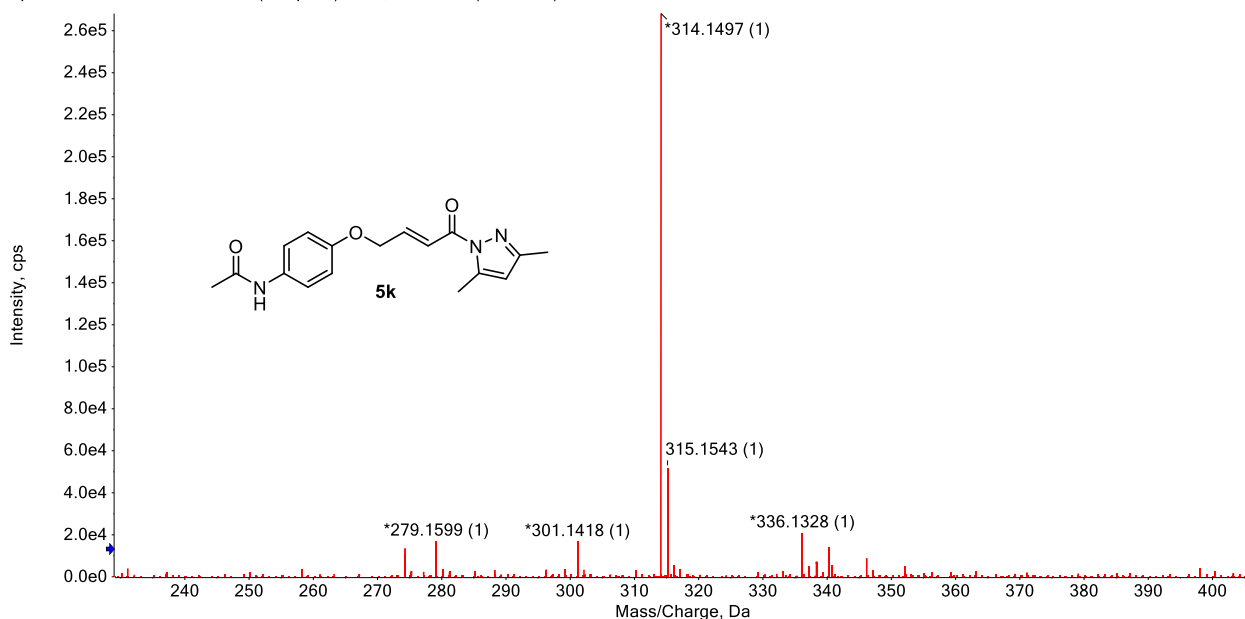

Spectrum from WPA-2024.wiff2 (sample 23) - 371, +TOF MS (50 - 2000) from 0.208 min

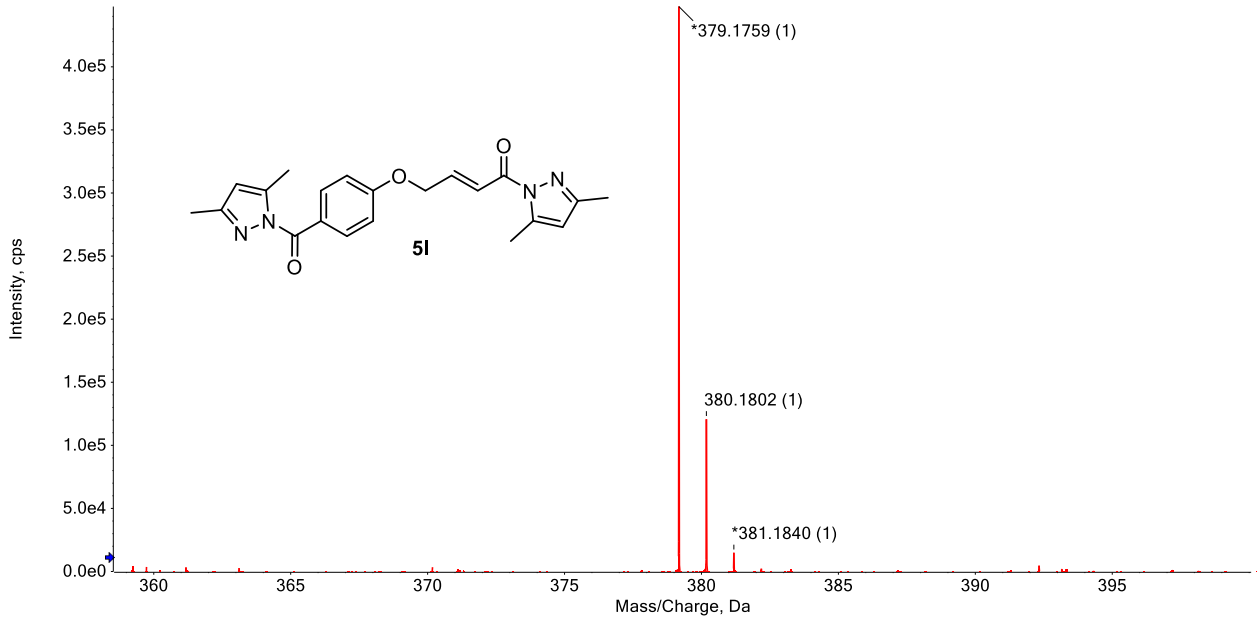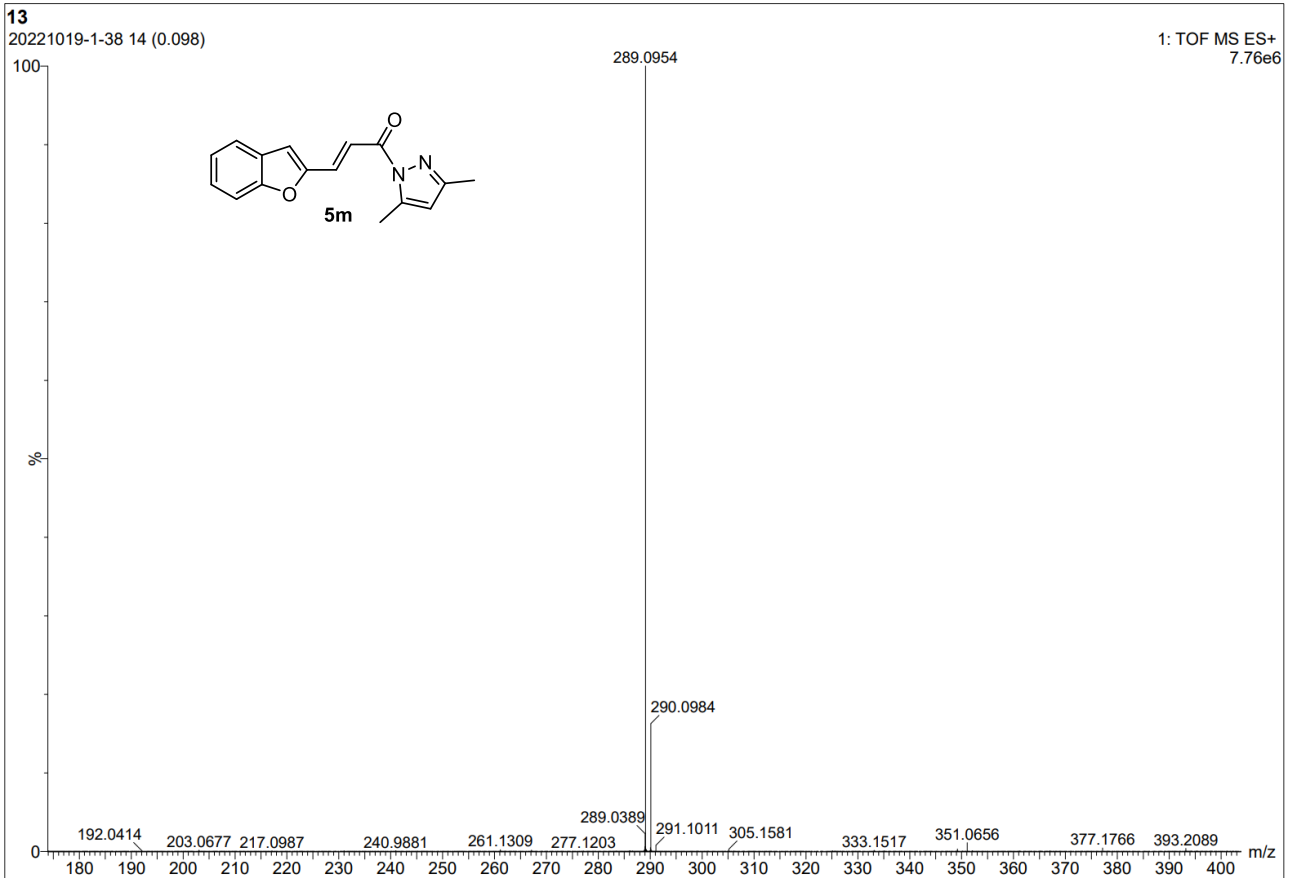

13

20221019-1-36 16 (0.109)

1: TOF MS ES+  
2.78e6

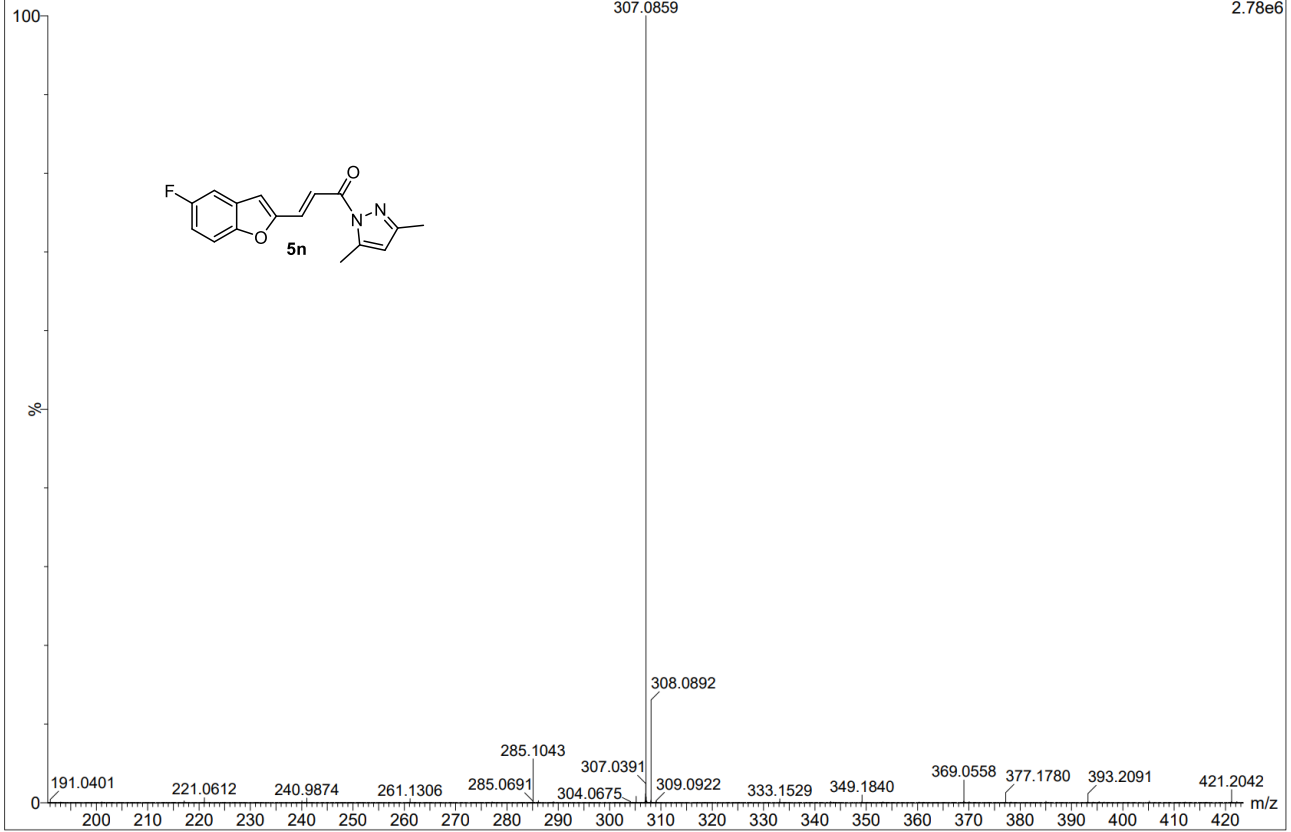

13

20221019-1-35 21 (0.135)

1: TOF MS ES+  
3.90e5

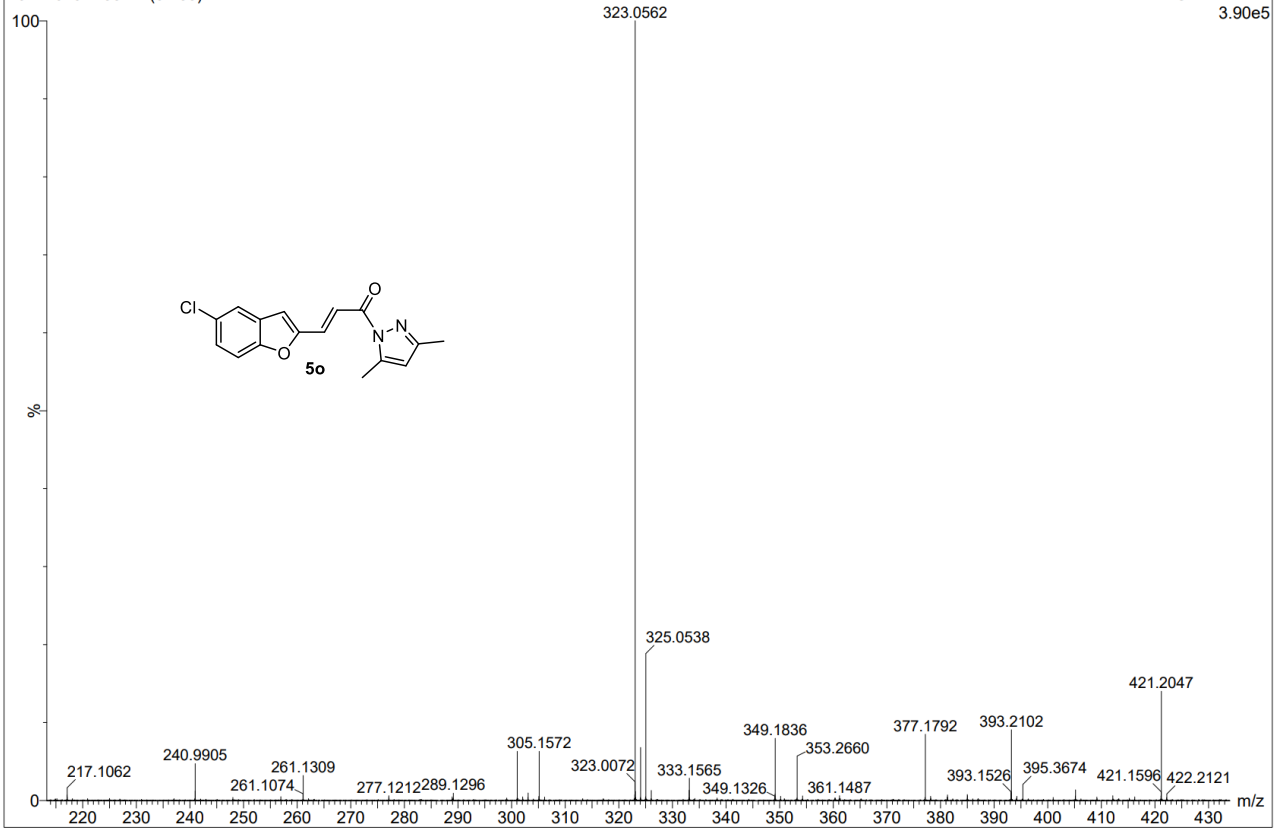

13

20221019-1-37 14 (0.098)

1: TOF MS ES+  
8.87e4

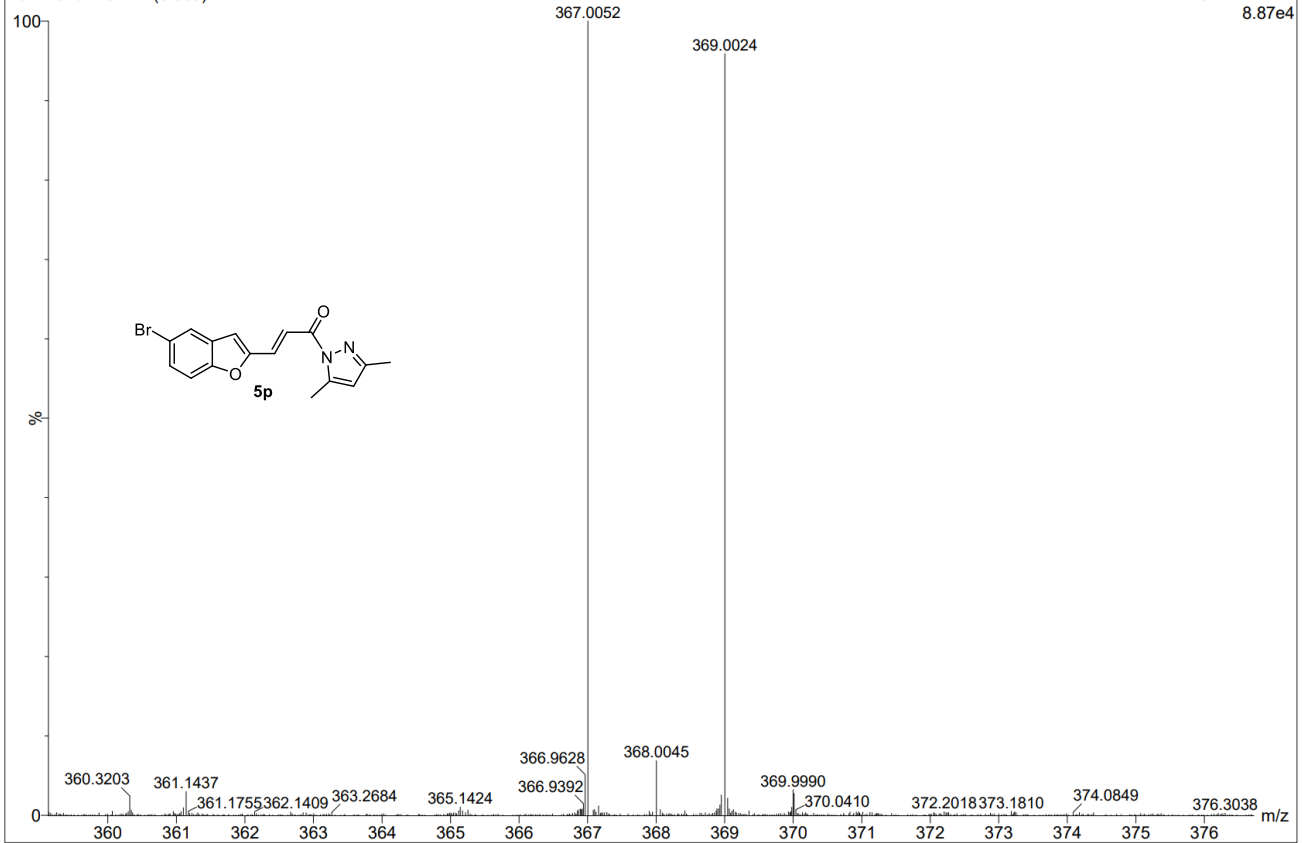

13

20221019-1-39 17 (0.114)

1: TOF MS ES+  
6.66e6

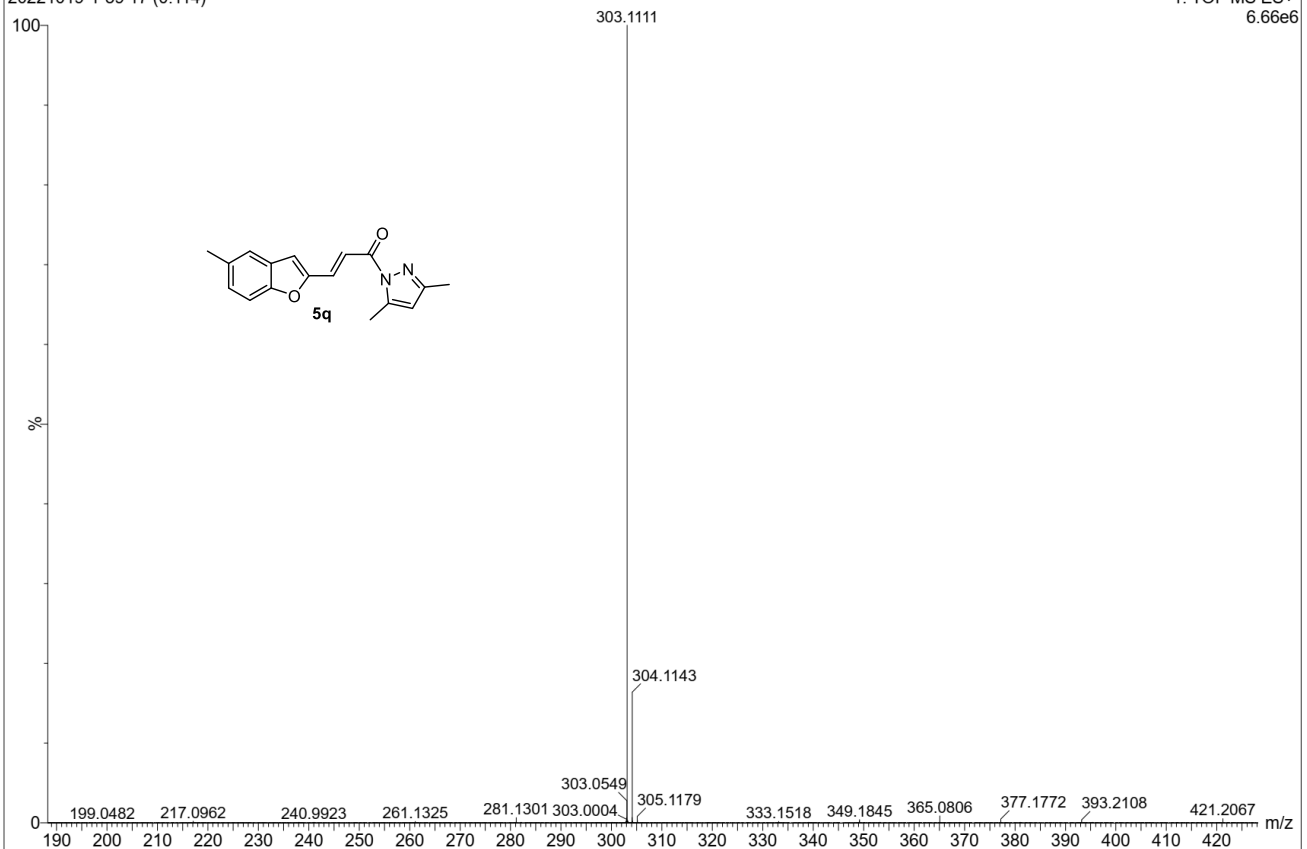

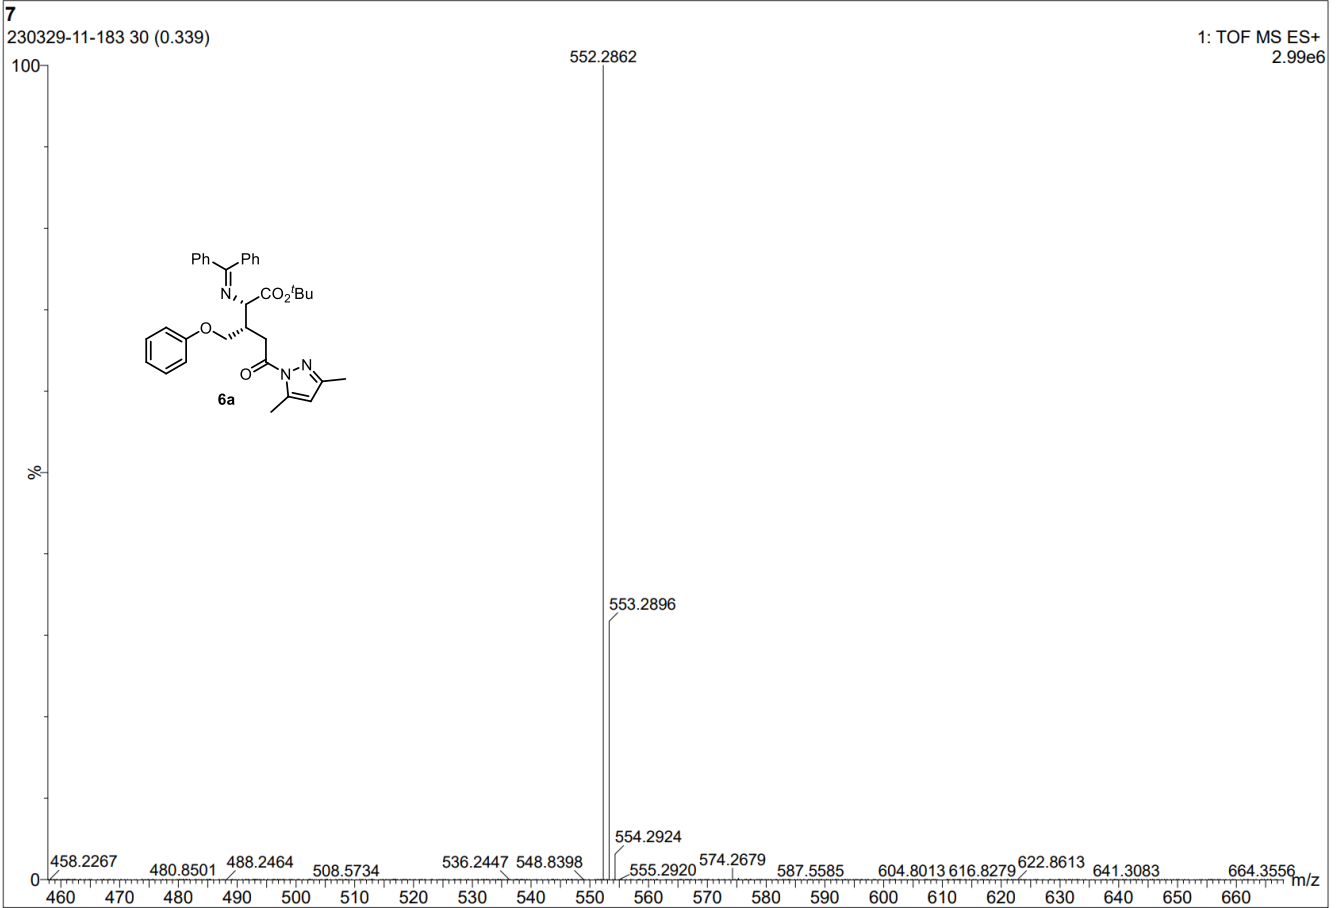

Spectrum from WPA-2024.wiff2 (sample 2) - 351, +TOF MS (50 - 2000) from 0.454 min

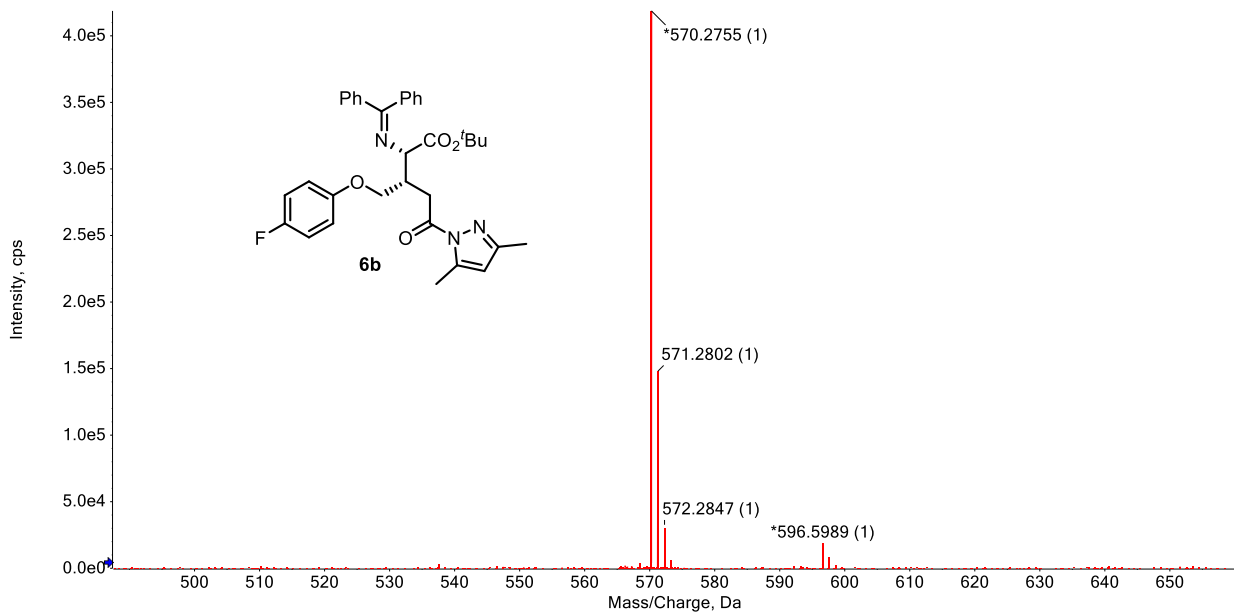

Spectrum from WPA-2024.wiff2 (sample 19) - 367, +TOF MS (50 - 2000) from 0.556 min

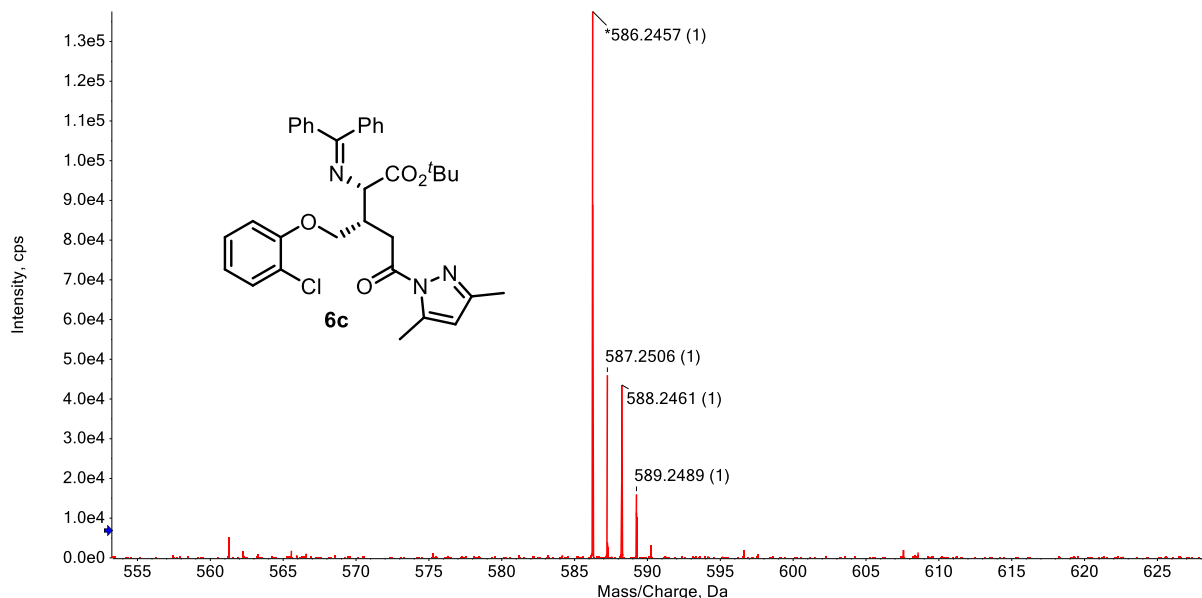

Spectrum from WPA-2024.wiff2 (sample 8) - 357, +TOF MS (50 - 2000) from 0.510 min

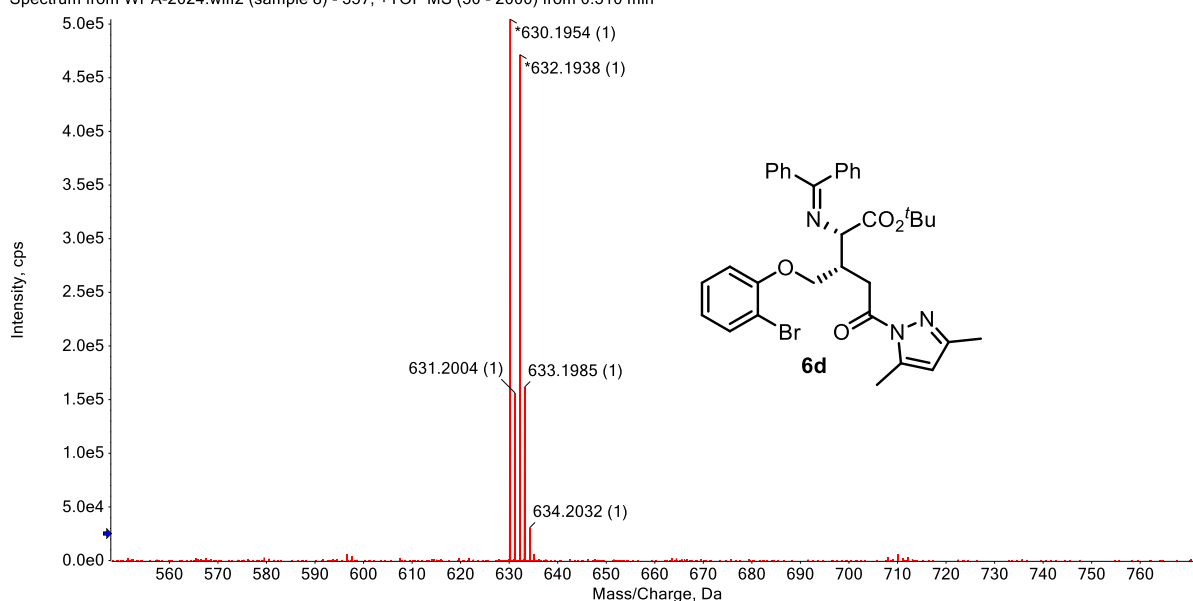

Spectrum from WPA-1022.wiff2 (sample 3) - WXY-3, +TOF MS (50 - 2000) from 0.272 min

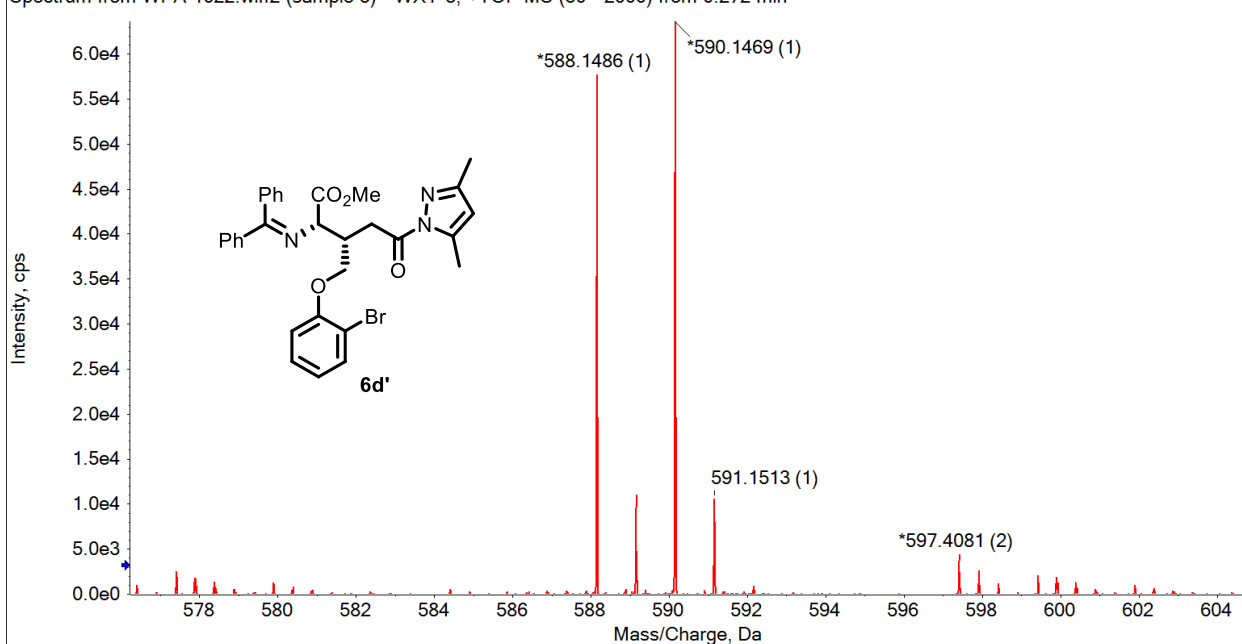

Spectrum from WPA-2024.wiff2 (sample 6) - 355, +TOF MS (50 - 2000) from 0.533 min

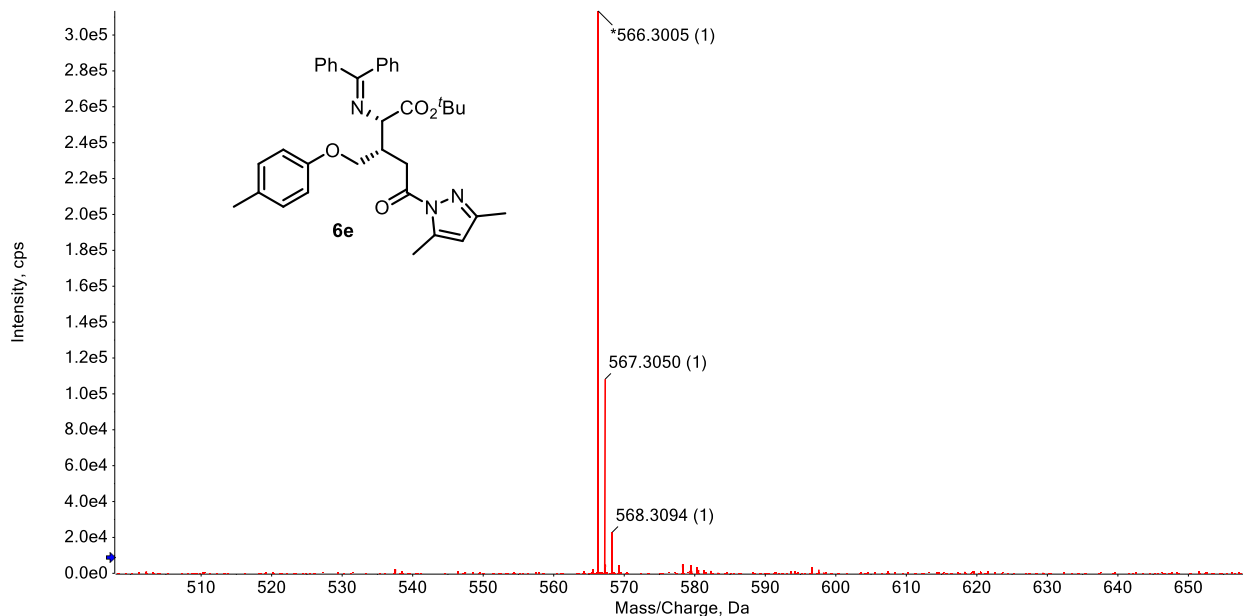

Spectrum from WPA-2024.wiff2 (sample 10) - 359, +TOF MS (50 - 2000) from 0.454 min

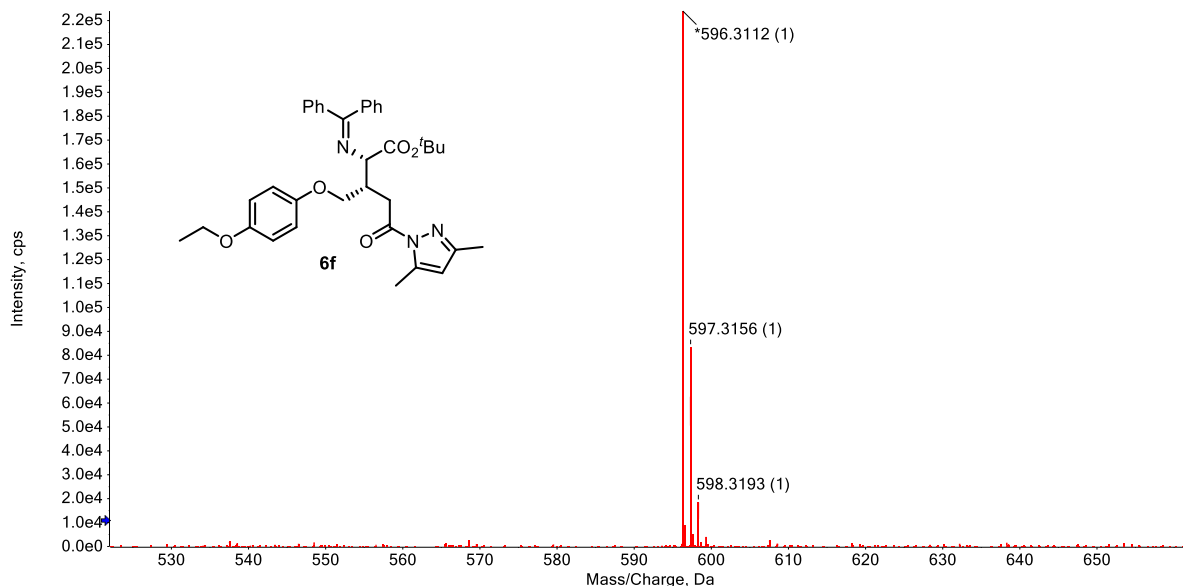

Spectrum from WPA-2024.wiff2 (sample 50) - 374, +TOF MS (50 - 2000) from 0.487 min

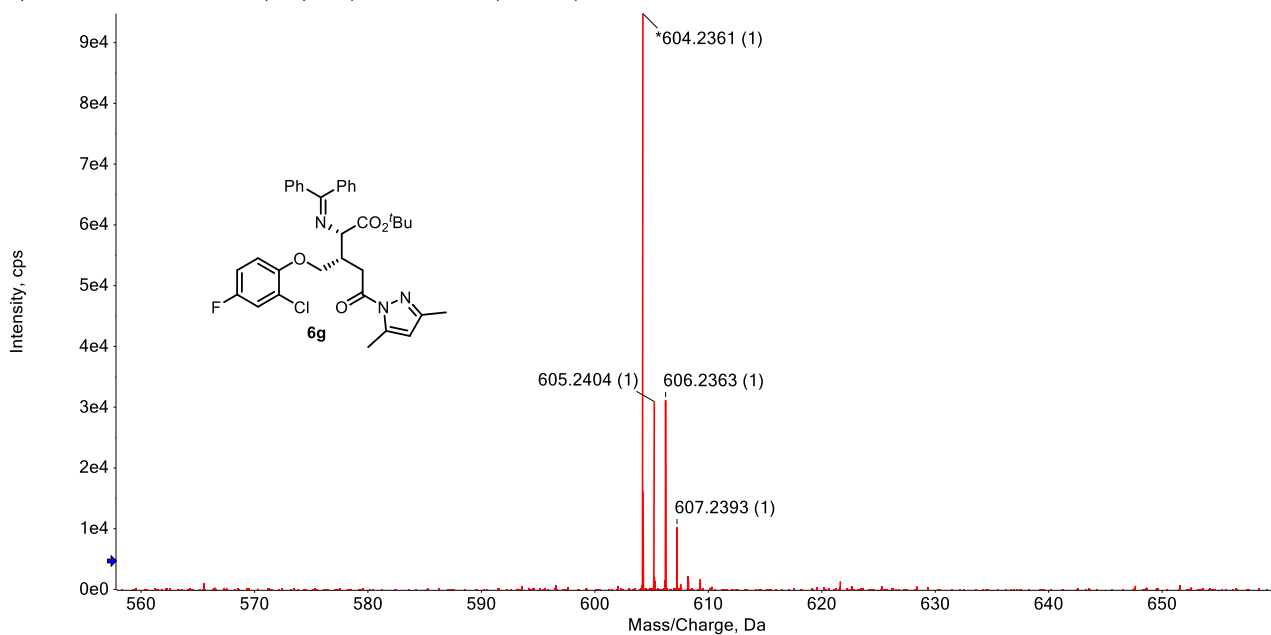

Spectrum from WPA-2024.wiff2 (sample 14) - 363, +TOF MS (50 - 2000) from 0.366 min

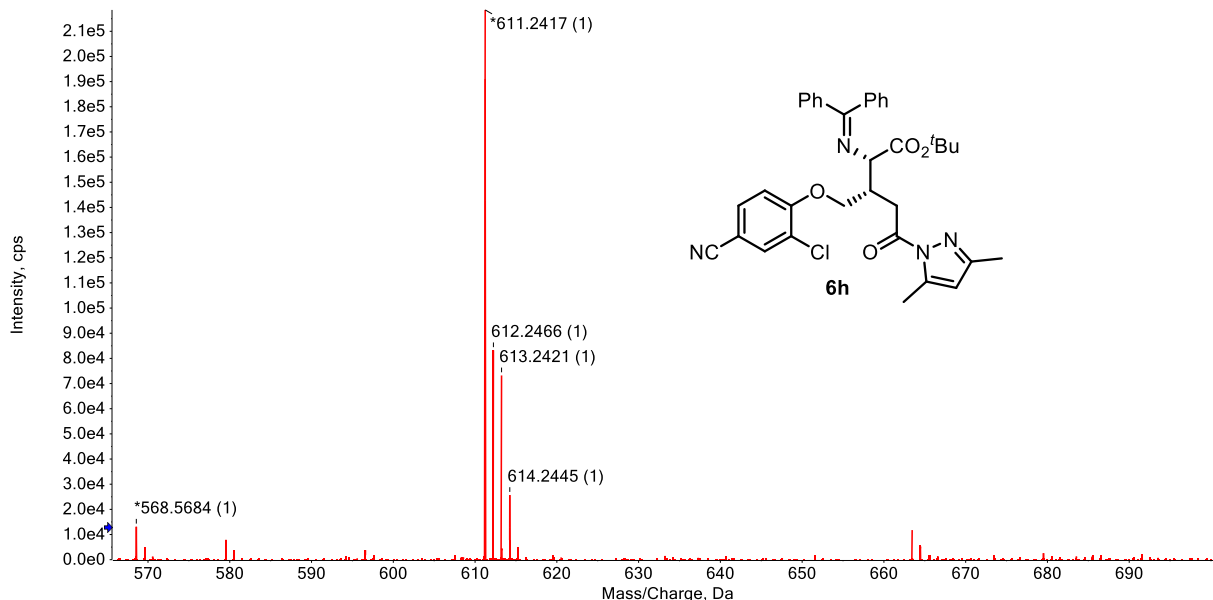

Spectrum from WPA-2024.wiff2 (sample 48) - 369, +TOF MS (50 - 2000) from 0.519 min

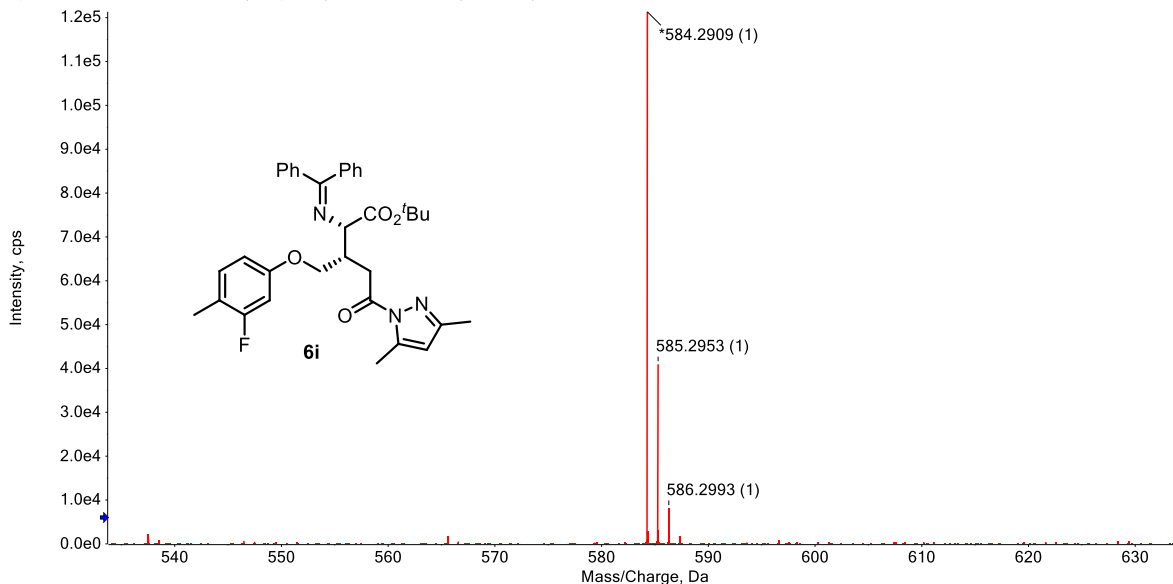

Spectrum from WPA-2024.wiff2 (sample 43) - 361, +TOF MS (50 - 2000) from 0.737 min

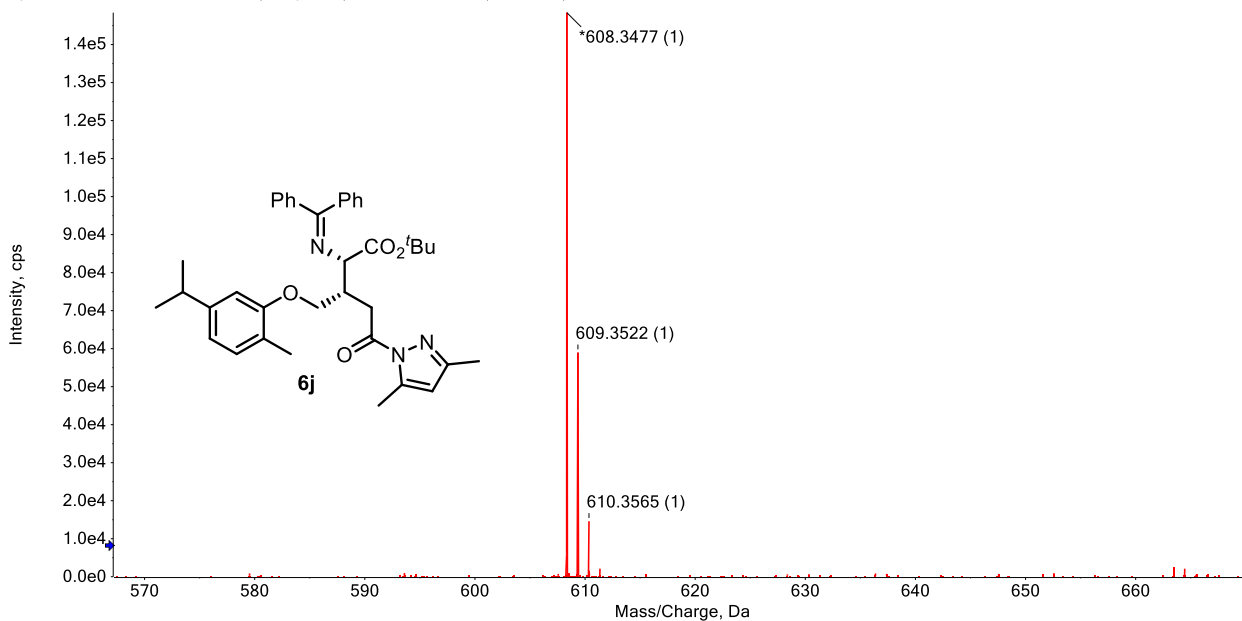

Spectrum from WPA-2024.wiff2 (sample 4) - 353, +TOF MS (50 - 2000) from 0.315 min

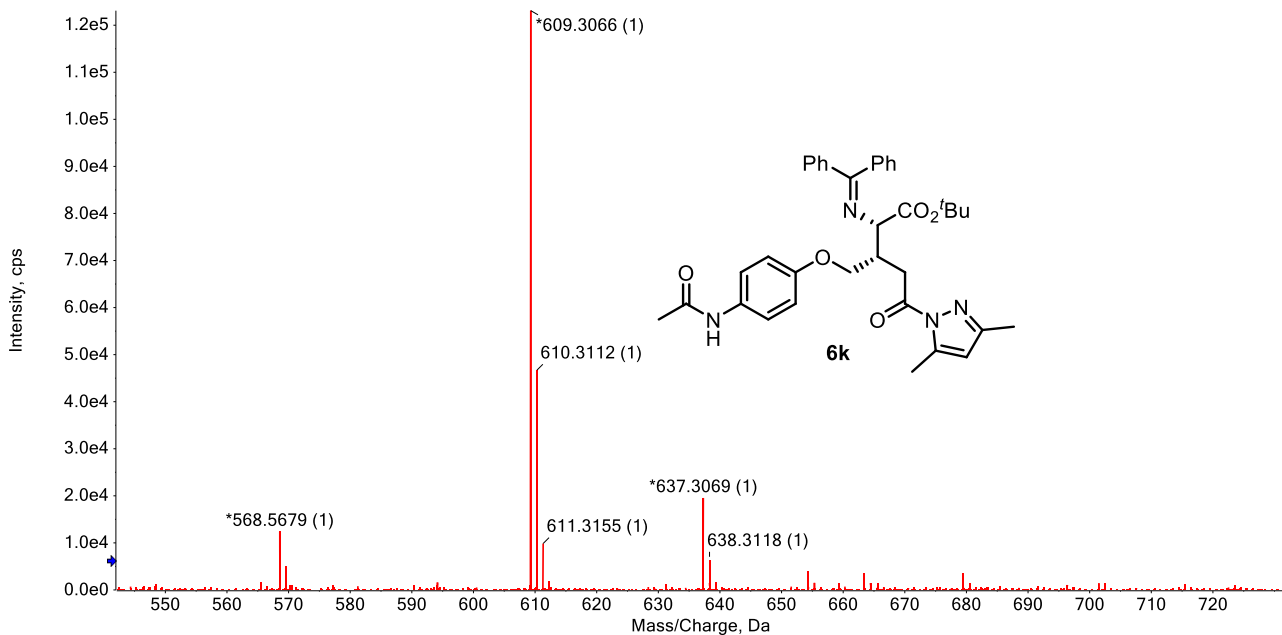

Spectrum from WPA-2024.wiff2 (sample 49) - 372, +TOF MS (50 - 2000) from 0.482 min

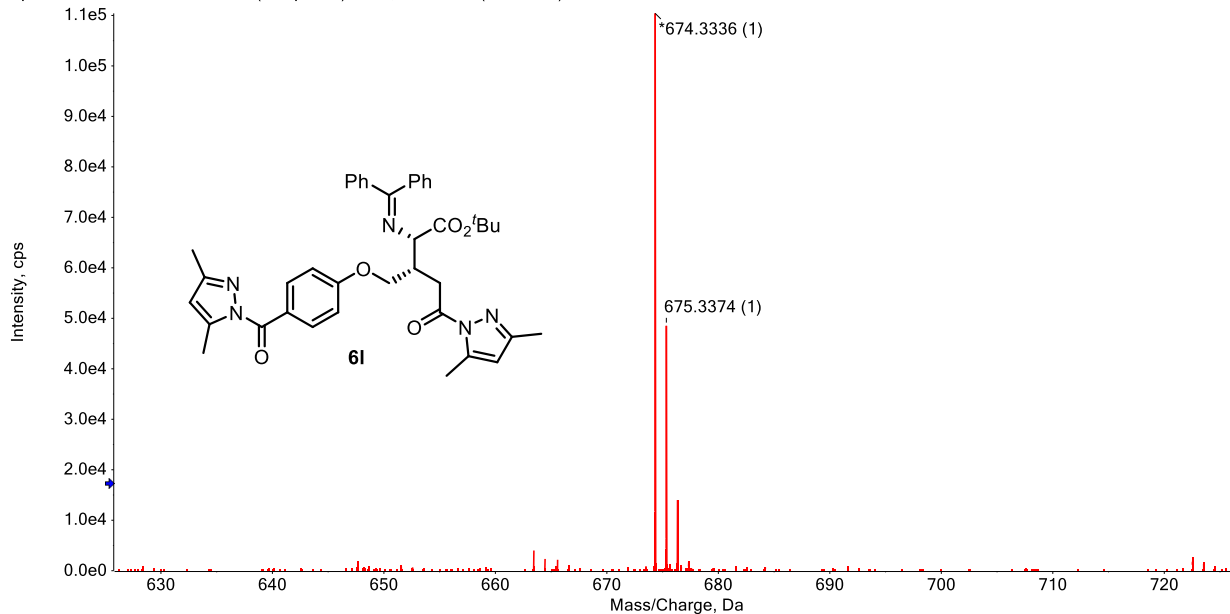

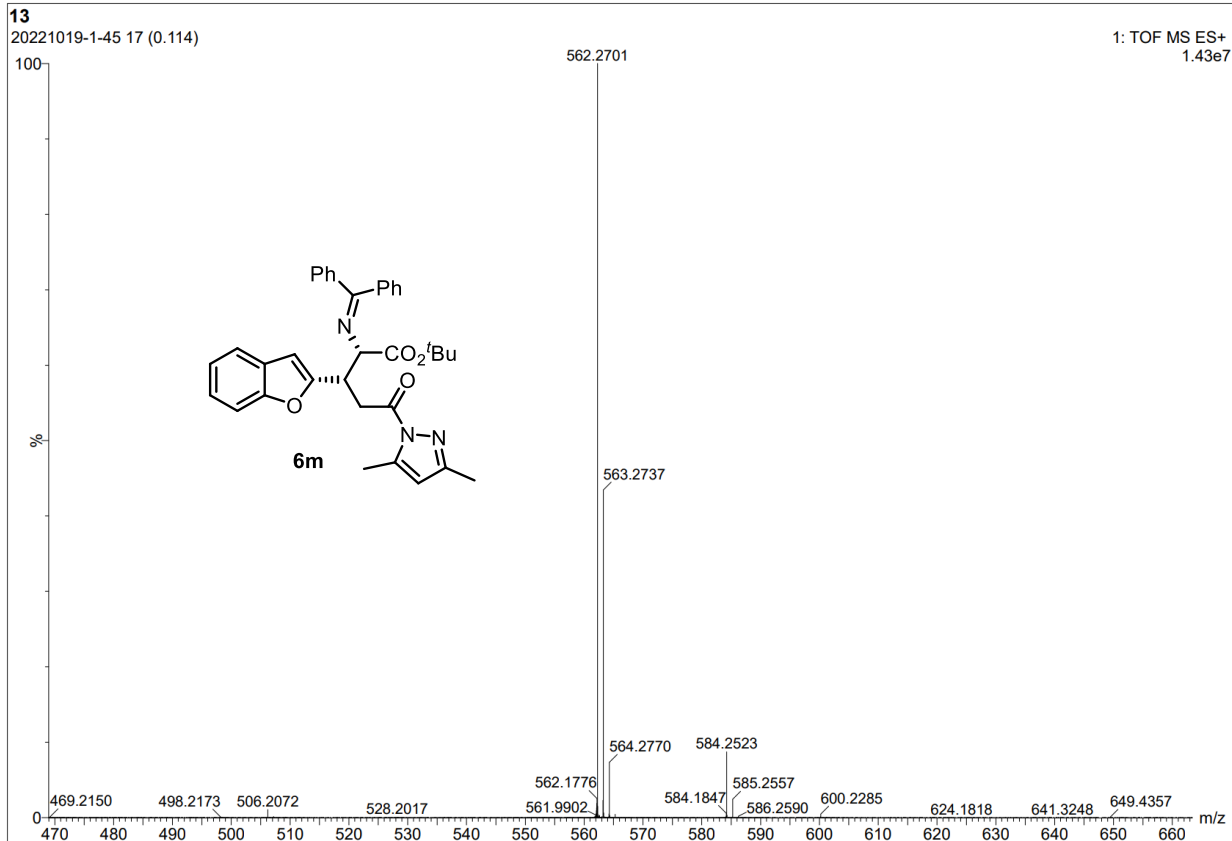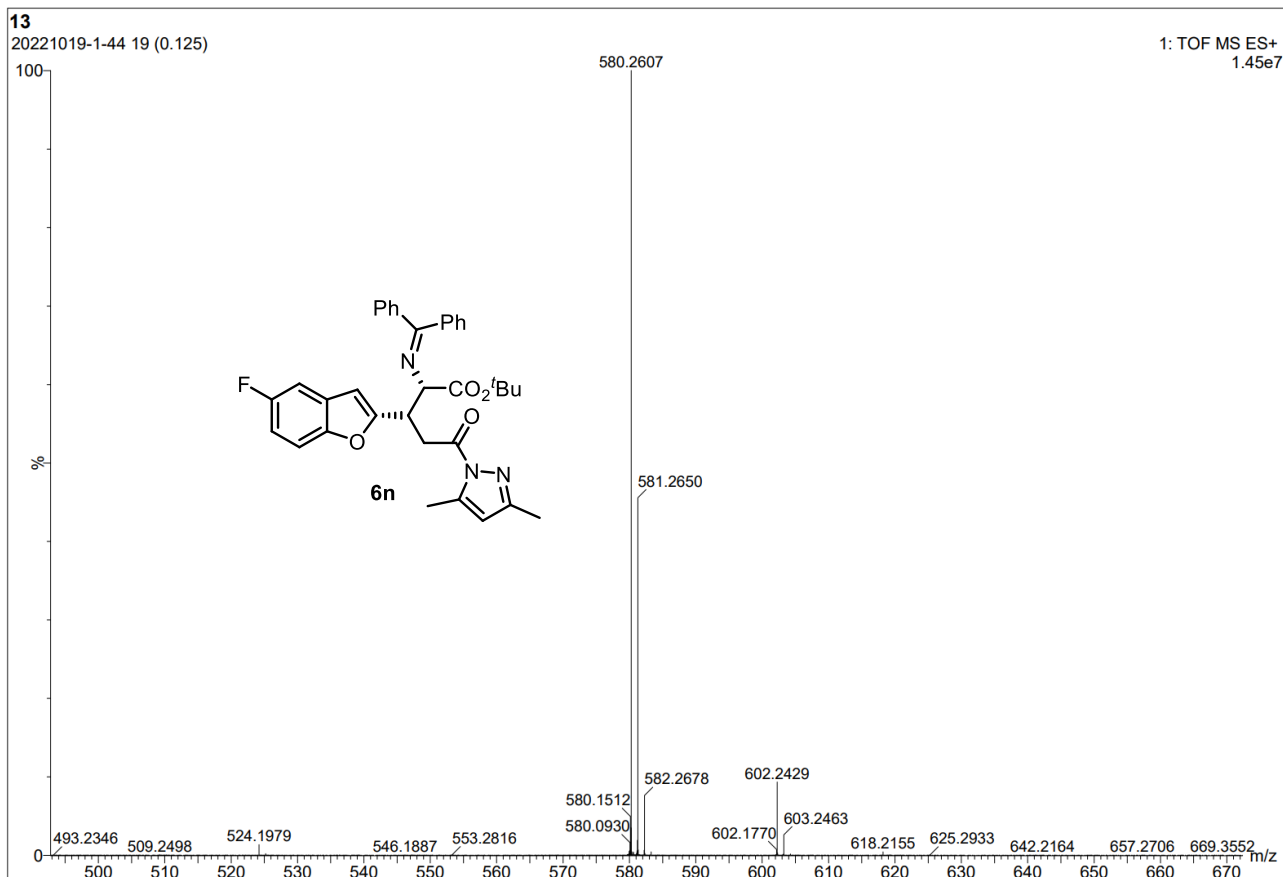

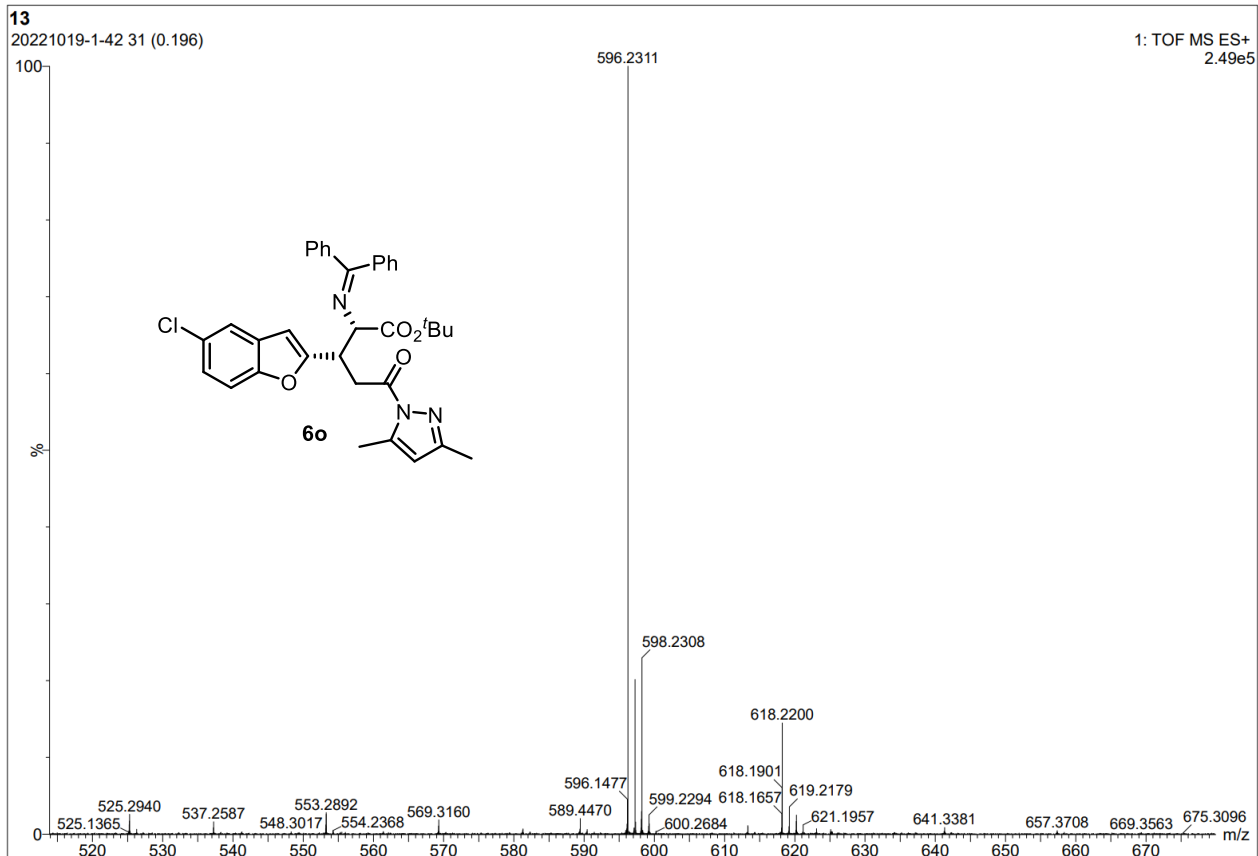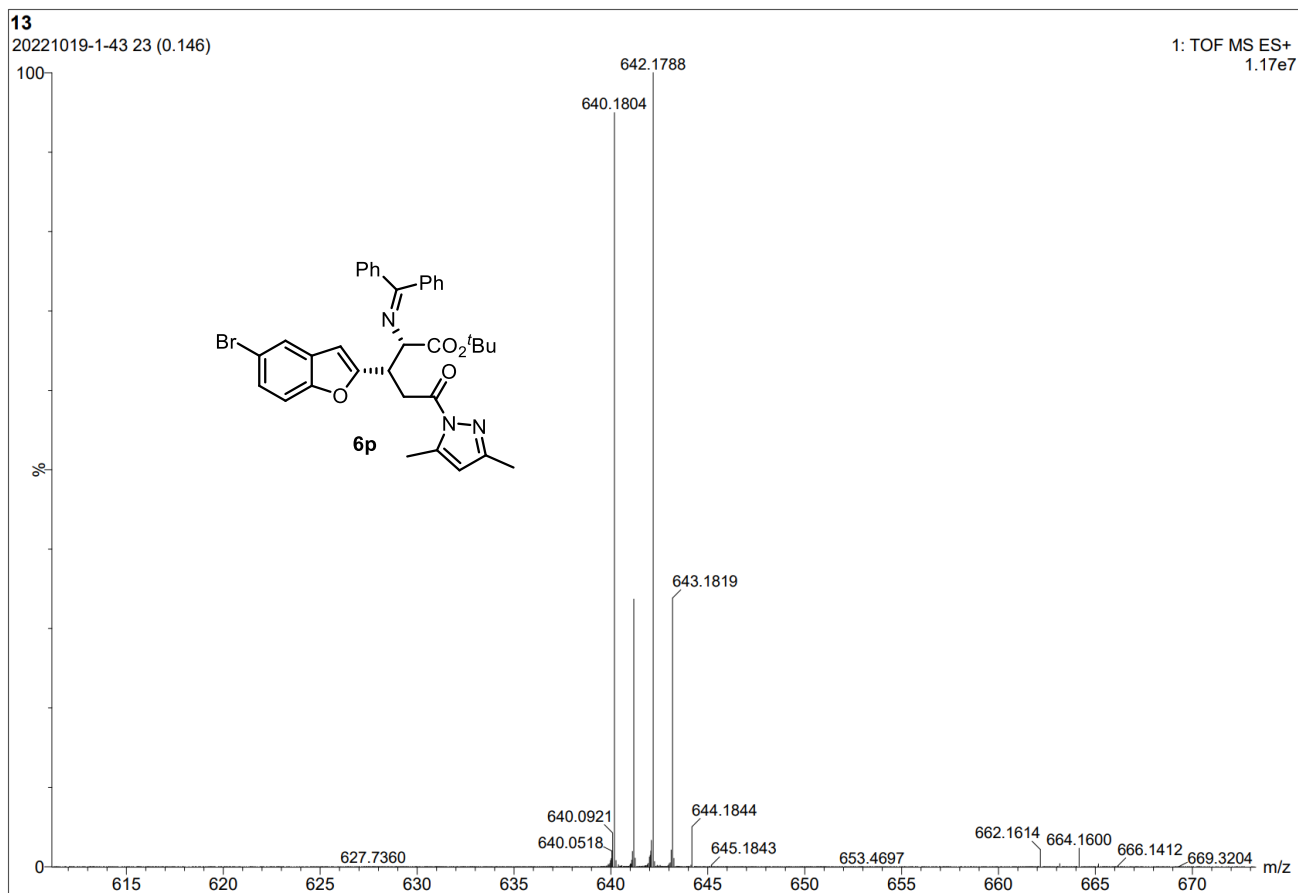

13

230801-8-294 14 (0.169)

1: TOF MS ES+  
3.94e6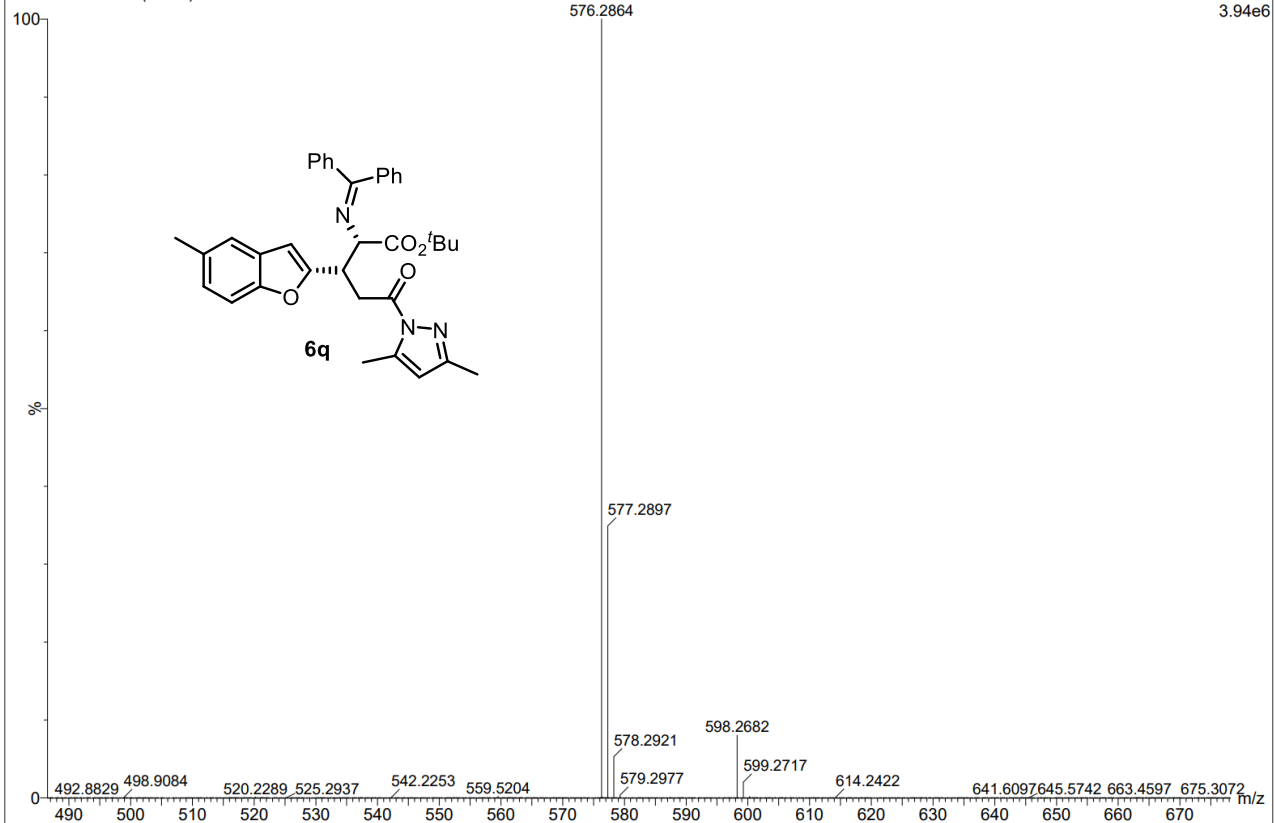

Spectrum from WPA-1022.wiff2 (sample 2) - WXY-2, +TOF MS (50 - 2000) from 0.155 min

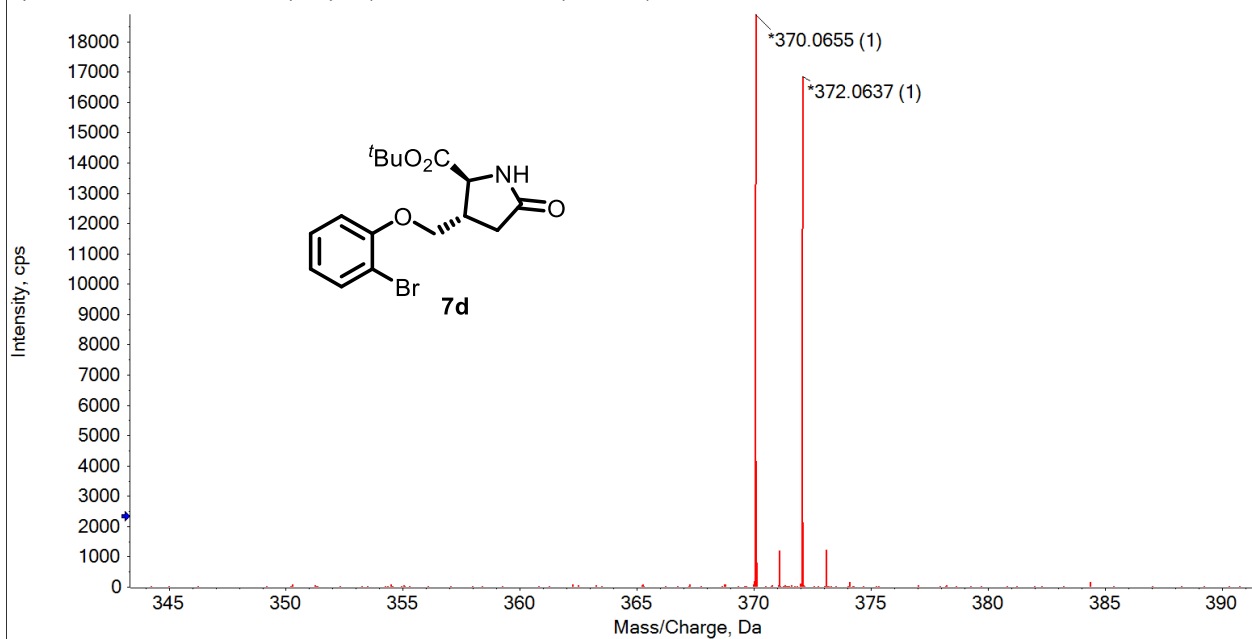



## 6. HPLC Charts

**6a:** Chiralpak OD-H, Hexane/2-Propanol = 90:10, flow rate 0.8 mL/min, 254 nm, 98% *ee*

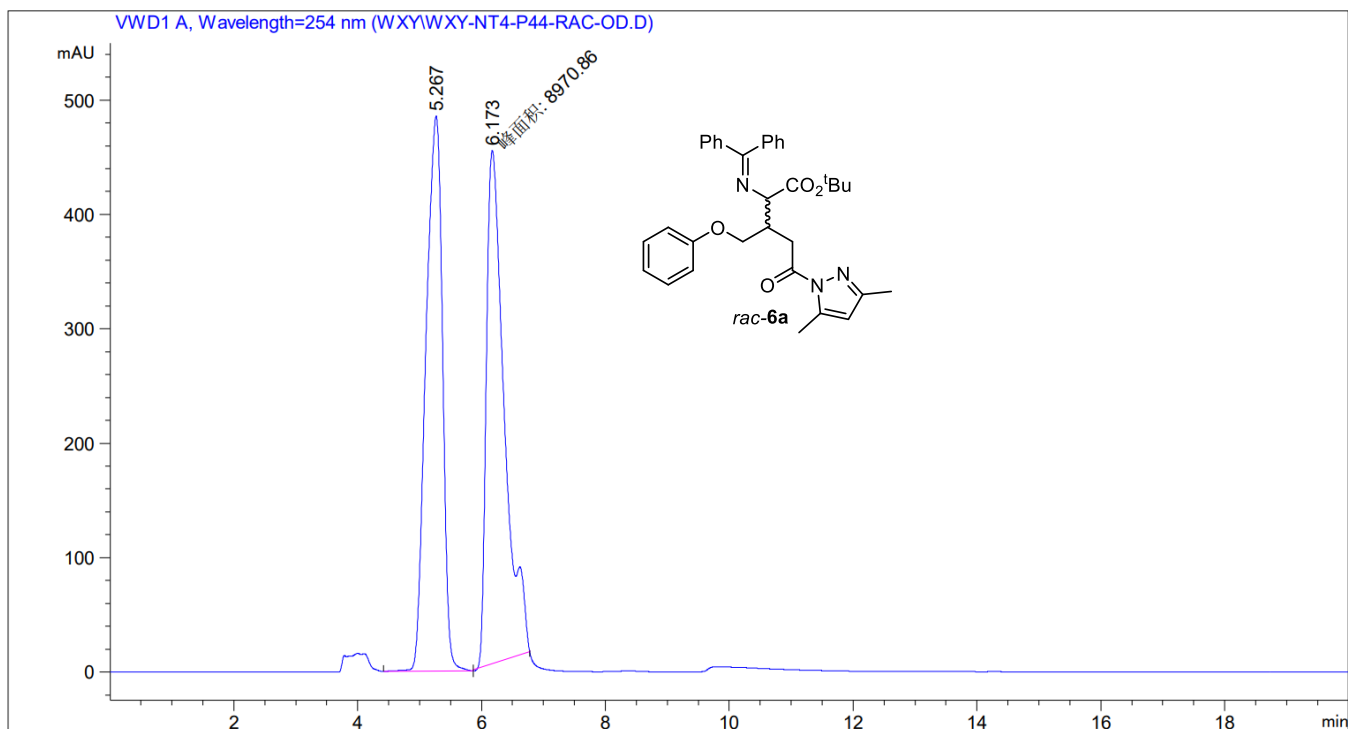

| 峰 # | 保留时间 [min] | 类型 | 峰宽 [min] | 峰面积 [mAU*s] | 峰高 [mAU]  | 峰面积 %   |
|-----|------------|----|----------|-------------|-----------|---------|
| 1   | 5.267      | BB | 0.3114   | 8998.98340  | 485.20590 | 50.0783 |
| 2   | 6.173      | MM | 0.3333   | 8970.85547  | 448.53177 | 49.9217 |

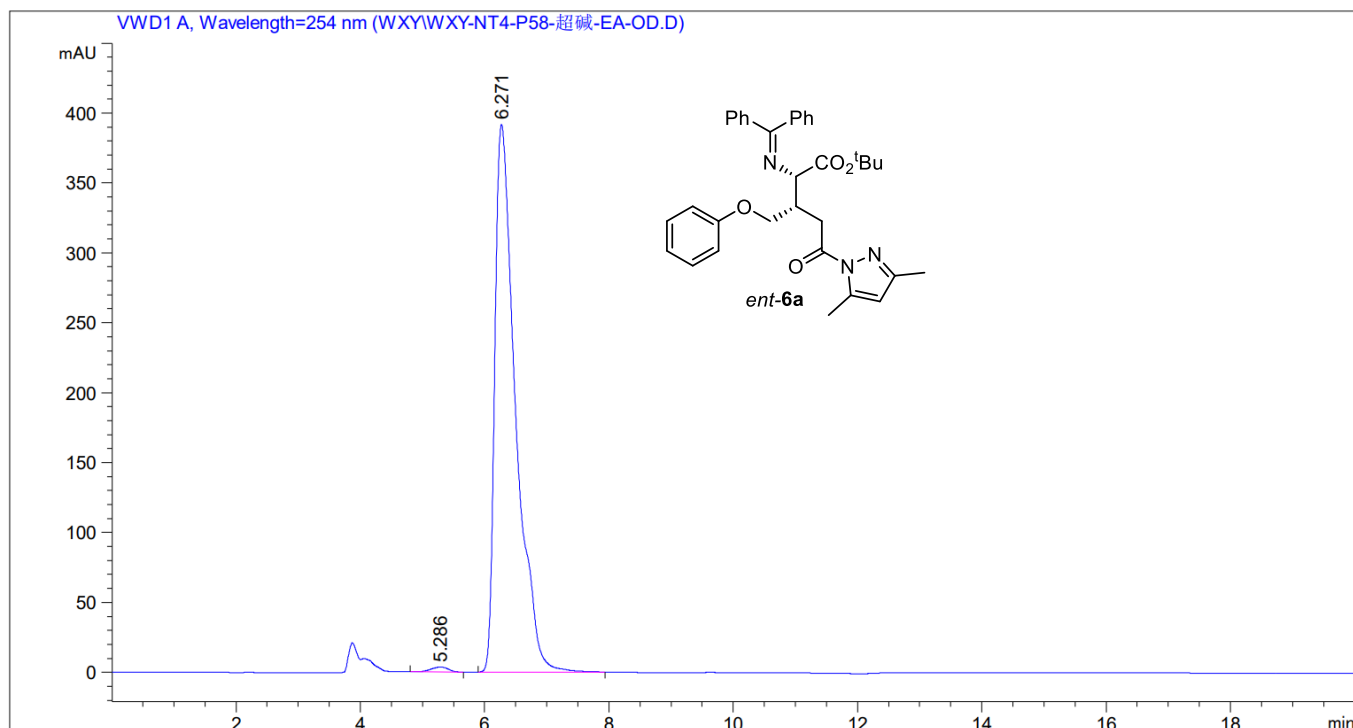

| 峰 # | 保留时间 [min] | 类型   | 峰宽 [min] | 峰面积 [mAU*s] | 峰高 [mAU]  | 峰面积 %   |
|-----|------------|------|----------|-------------|-----------|---------|
| 1   | 5.286      | BB   | 0.3096   | 66.95730    | 3.44667   | 0.7338  |
| 2   | 6.271      | VB R | 0.3396   | 9058.12012  | 391.70947 | 99.2662 |

**6b:** Chiralpak OD-H, Hexane/2-Propanol = 90:10, flow rate 0.8 mL/min, 254 nm, 98% ee

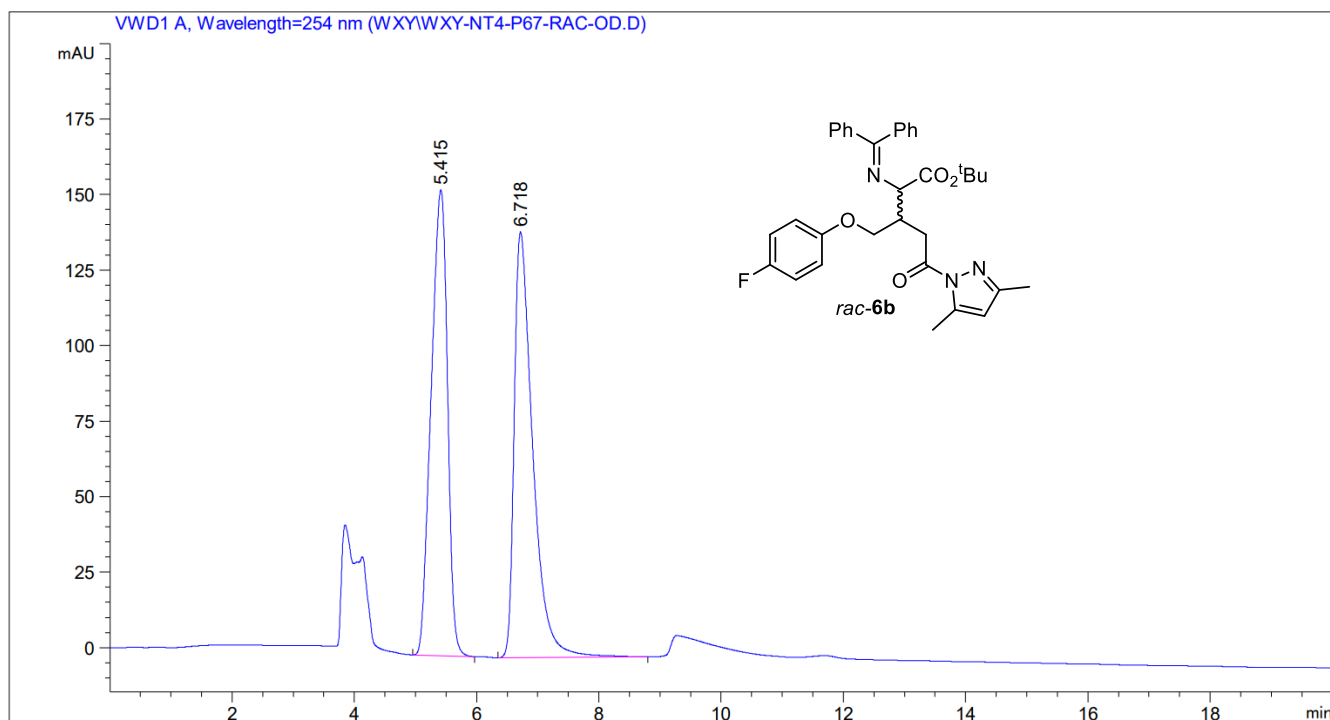

| 峰 # | 保留时间 [min] | 类型 | 峰宽 [min] | 峰面积 [mAU*s] | 峰高 [mAU]  | 峰面积 %   |
|-----|------------|----|----------|-------------|-----------|---------|
| 1   | 5.415      | BB | 0.2931   | 2857.42822  | 154.23409 | 49.0064 |
| 2   | 6.718      | BB | 0.3160   | 2973.30078  | 141.00313 | 50.9936 |

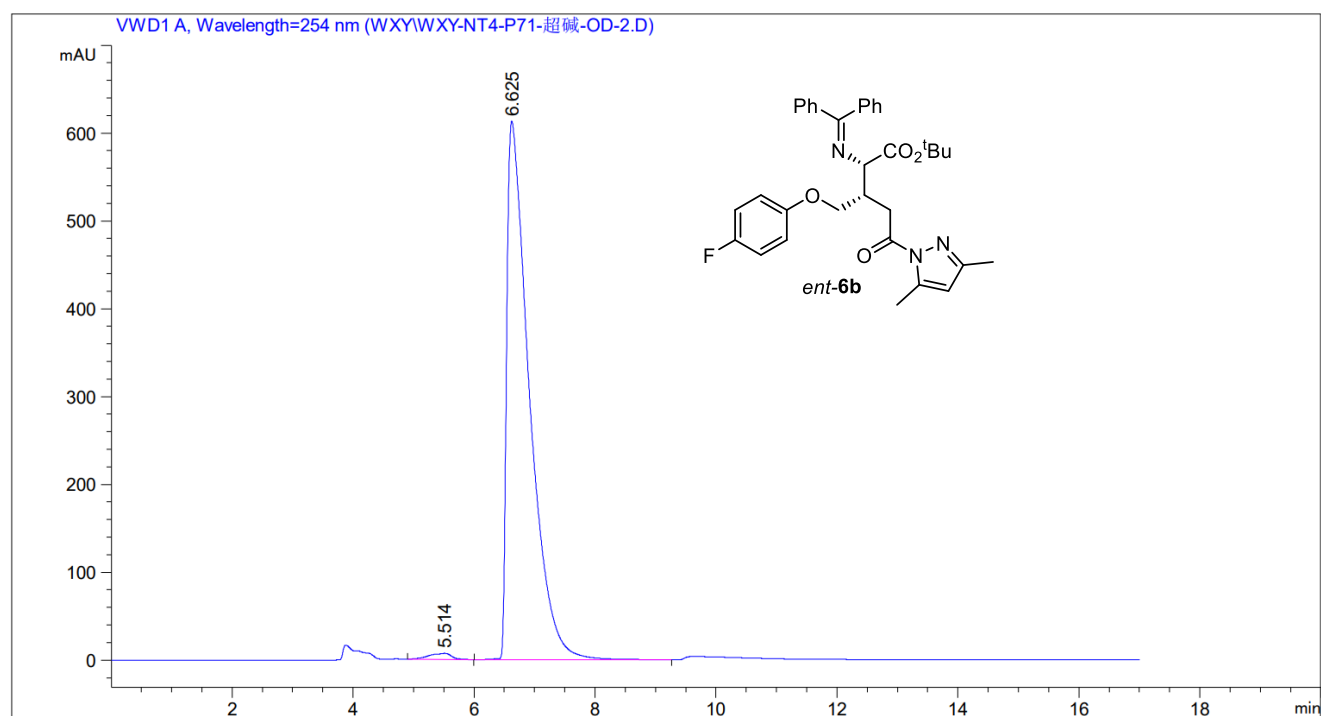

| 峰 # | 保留时间 [min] | 类型 | 峰宽 [min] | 峰面积 [mAU*s] | 峰高 [mAU]  | 峰面积 %   |
|-----|------------|----|----------|-------------|-----------|---------|
| 1   | 5.514      | VB | 0.3655   | 191.26997   | 7.09503   | 1.1939  |
| 2   | 6.625      | BB | 0.3943   | 1.58288e4   | 612.89136 | 98.8061 |

**6c:** Chiralpak OD-H, Hexane/2-Propanol = 90:10, flow rate 0.8 mL/min, 254 nm, 98% *ee*

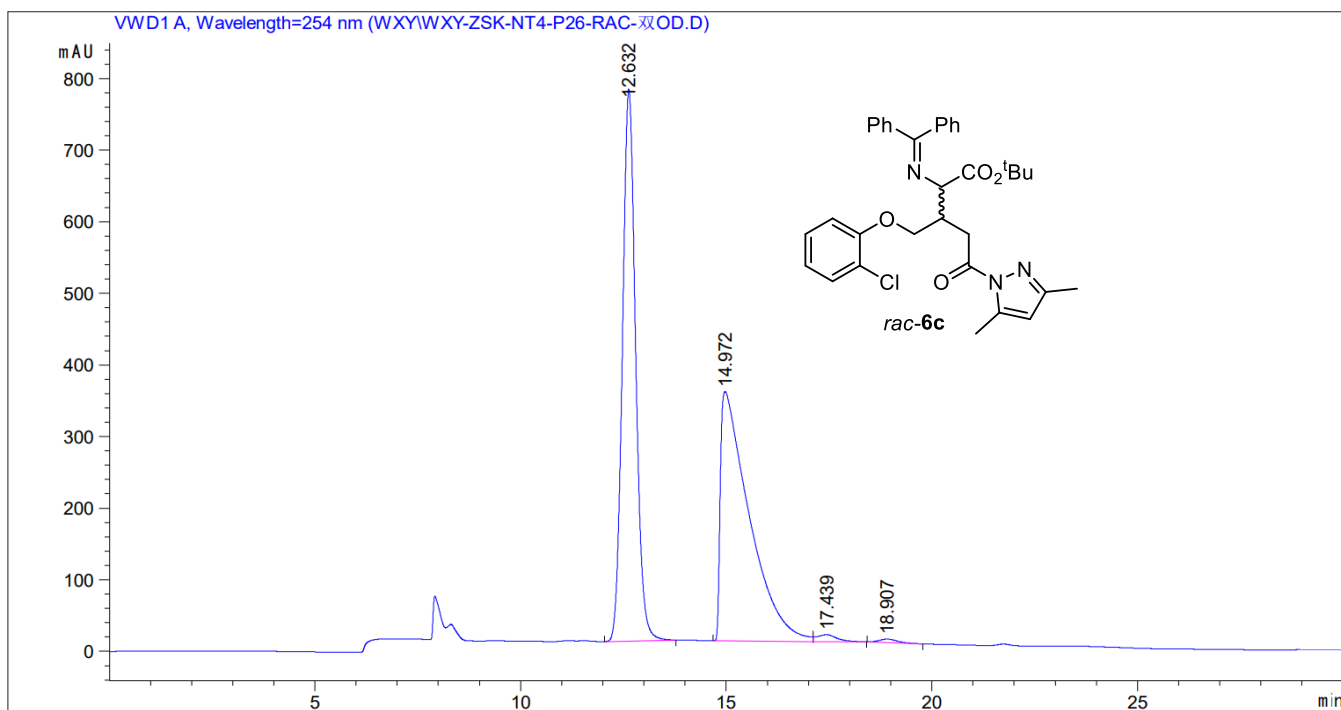

| 峰 # | 保留时间 [min] | 类型 | 峰宽 [min] | 峰面积 [mAU*s] | 峰高 [mAU]  | 峰面积 %   |
|-----|------------|----|----------|-------------|-----------|---------|
| 1   | 12.632     | BB | 0.3395   | 1.71533e4   | 771.12024 | 49.5547 |
| 2   | 14.972     | BV | 0.6838   | 1.69842e4   | 348.37381 | 49.0661 |
| 3   | 17.439     | VB | 0.4941   | 329.99570   | 9.62245   | 0.9533  |
| 4   | 18.907     | BB | 0.4714   | 147.39612   | 4.79813   | 0.4258  |

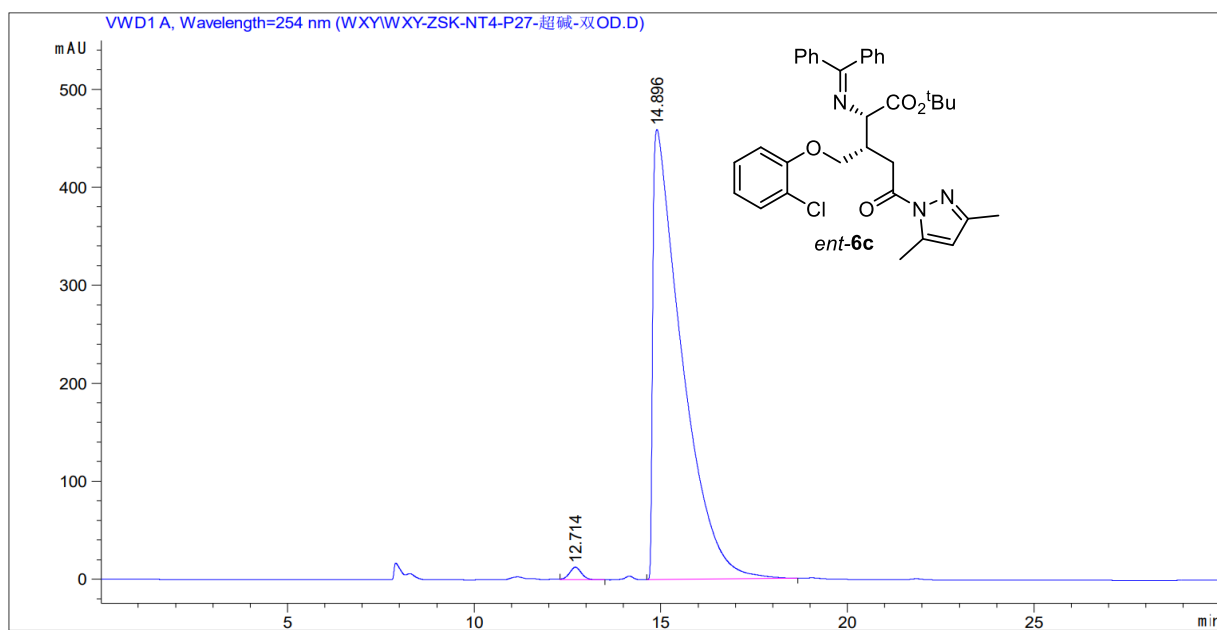

| 峰 # | 保留时间 [min] | 类型 | 峰宽 [min] | 峰面积 [mAU*s] | 峰高 [mAU]  | 峰面积 %   |
|-----|------------|----|----------|-------------|-----------|---------|
| 1   | 12.714     | VB | 0.3389   | 287.53424   | 12.80841  | 1.1464  |
| 2   | 14.896     | BB | 0.7527   | 2.47933e4   | 459.38339 | 98.8536 |

**6d**: Chiralpak OD-H, Hexane/2-Propanol = 90:10, flow rate 0.8 mL/min, 254 nm, 95% *ee*

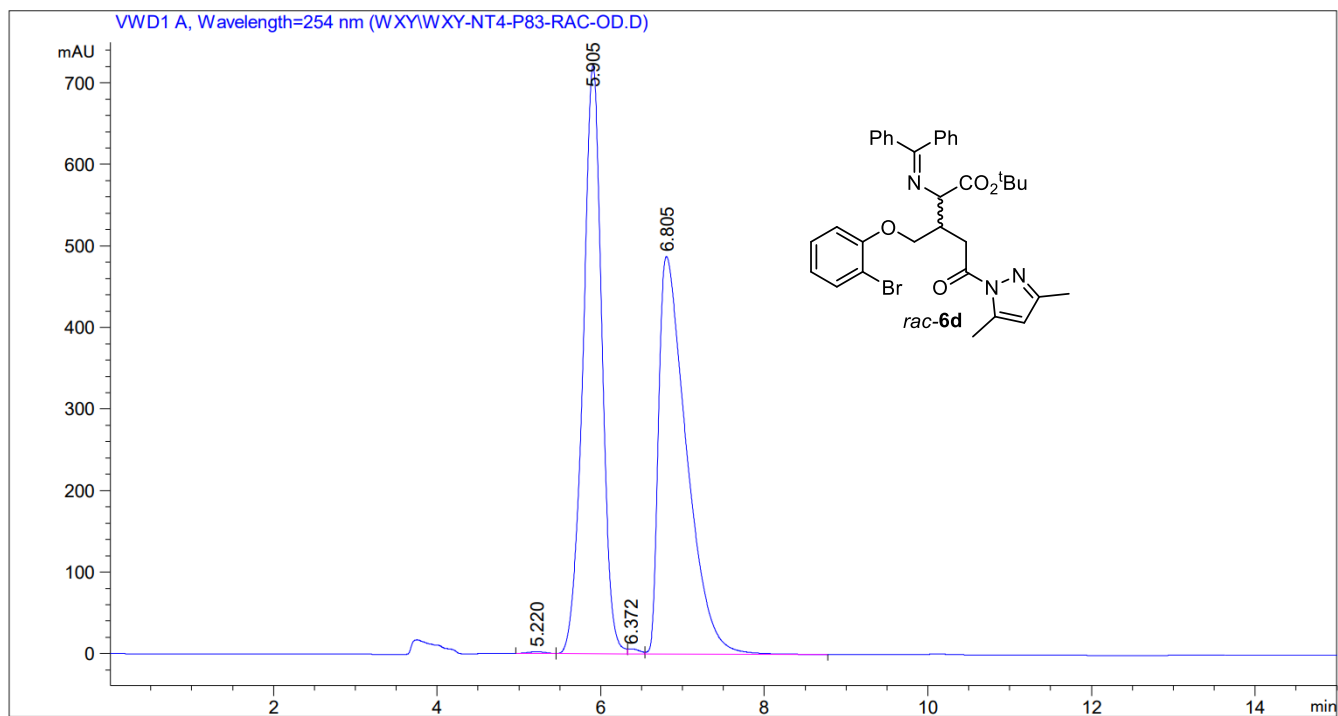

| 峰 # | 保留时间 [min] | 类型 | 峰宽 [min] | 峰面积 [mAU*s] | 峰高 [mAU]  | 峰面积 %   |
|-----|------------|----|----------|-------------|-----------|---------|
| 1   | 5.220      | VB | 0.2515   | 35.89716    | 2.25813   | 0.1554  |
| 2   | 5.905      | BV | 0.2426   | 1.14727e4   | 721.25623 | 49.6693 |
| 3   | 6.372      | VV | 0.1468   | 58.59090    | 6.11673   | 0.2537  |
| 4   | 6.805      | VB | 0.3561   | 1.15310e4   | 487.31595 | 49.9216 |

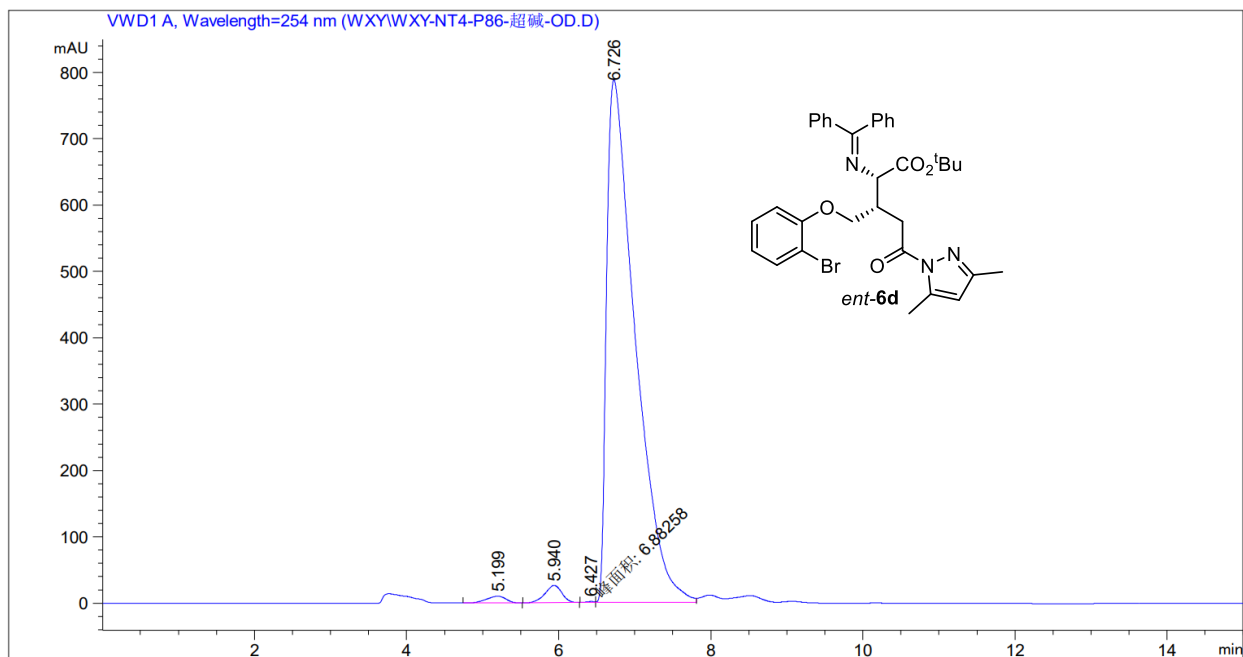

| 峰 # | 保留时间 [min] | 类型 | 峰宽 [min] | 峰面积 [mAU*s] | 峰高 [mAU]  | 峰面积 %   |
|-----|------------|----|----------|-------------|-----------|---------|
| 1   | 5.199      | BB | 0.2820   | 185.38196   | 10.34685  | 0.8790  |
| 2   | 5.940      | BB | 0.2388   | 407.62784   | 26.15991  | 1.9329  |
| 3   | 6.427      | MM | 0.1102   | 6.88258     | 1.04071   | 0.0326  |
| 4   | 6.726      | VV | 0.3812   | 2.04892e4   | 788.42419 | 97.1554 |

**6d'**: Chiralpak OD-H, Hexane/2-Propanol = 90:10, flow rate 0.8 mL/min, 254 nm, 93.5% *ee*

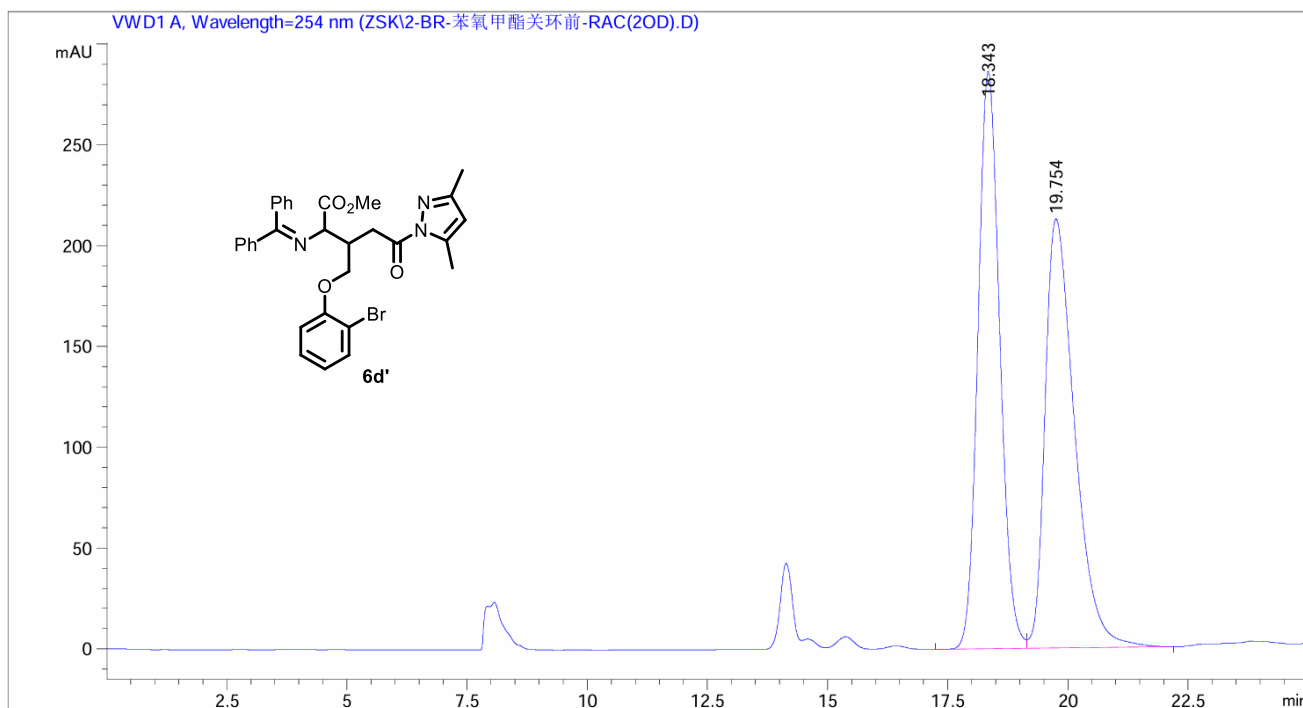

| 峰 # | 保留时间 [min] | 类型 | 峰宽 [min] | 峰面积 [mAU*s] | 峰高 [mAU]  | 峰面积 %   |
|-----|------------|----|----------|-------------|-----------|---------|
| 1   | 18.343     | BV | 0.4914   | 9040.09863  | 286.31525 | 49.8499 |
| 2   | 19.754     | VB | 0.6536   | 9094.53418  | 212.79874 | 50.1501 |

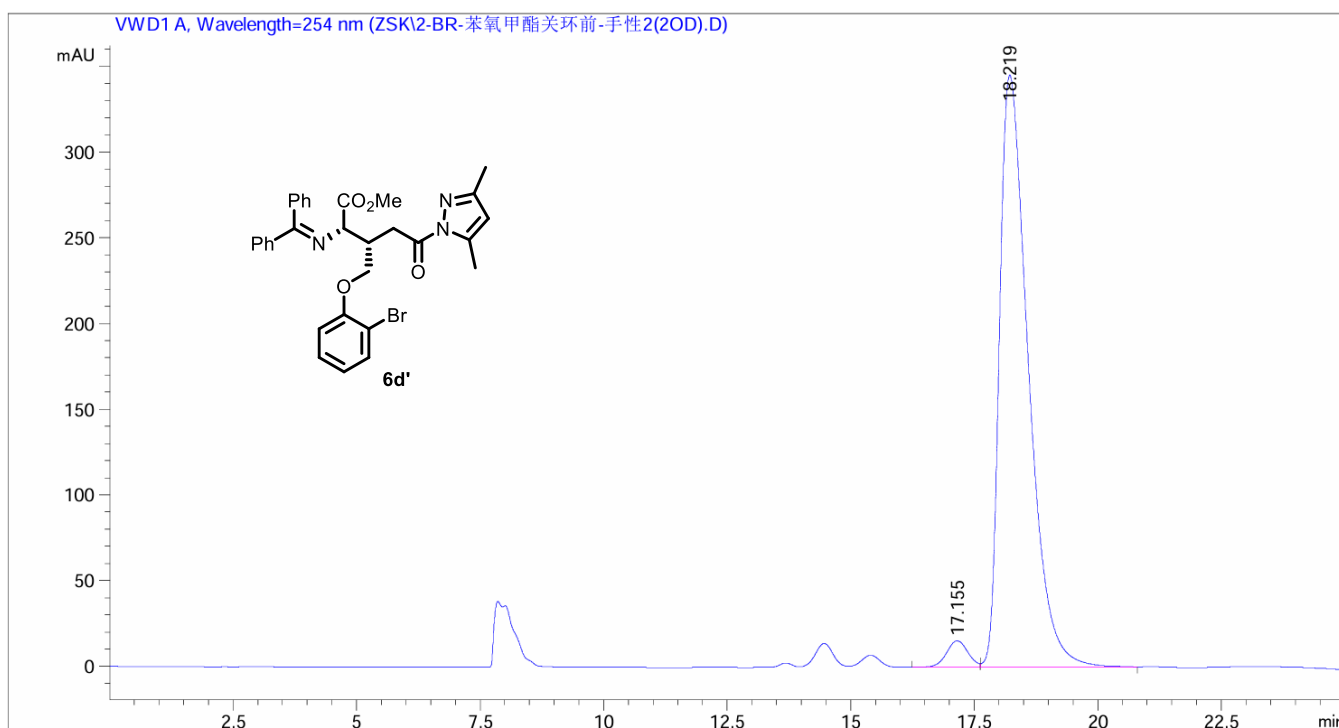

| 峰 # | 保留时间 [min] | 类型 | 峰宽 [min] | 峰面积 [mAU*s] | 峰高 [mAU]  | 峰面积 %   |
|-----|------------|----|----------|-------------|-----------|---------|
| 1   | 17.155     | BV | 0.4688   | 468.46130   | 15.49130  | 3.2505  |
| 2   | 18.219     | VB | 0.6199   | 1.39436e4   | 345.42664 | 96.7495 |

6e: Chiralpak OD-H, Hexane/2-Propanol = 90:10, flow rate 0.8 mL/min, 254 nm, 96% ee

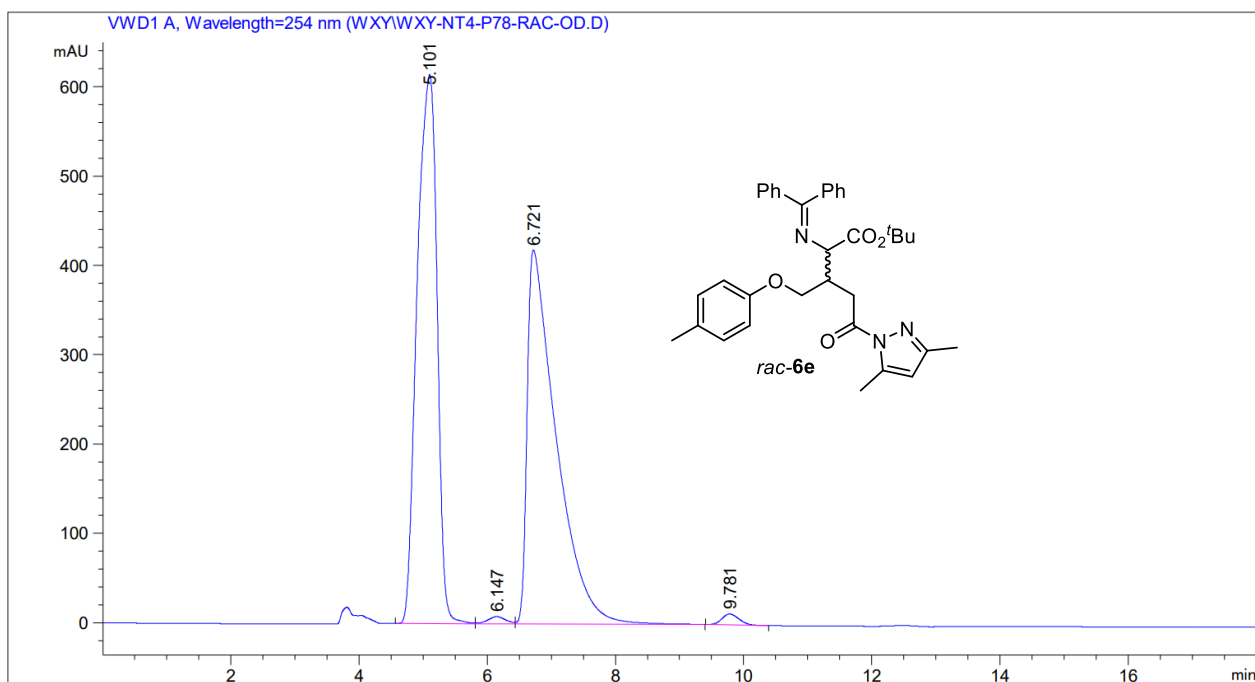

| 峰 # | 保留时间 [min] | 类型 | 峰宽 [min] | 峰面积 [mAU*s] | 峰高 [mAU]  | 峰面积 %   |
|-----|------------|----|----------|-------------|-----------|---------|
| 1   | 5.101      | BV | 0.3595   | 1.32455e4   | 614.36096 | 49.4506 |
| 2   | 6.147      | VV | 0.2876   | 152.34052   | 7.98296   | 0.5687  |
| 3   | 6.721      | VB | 0.4487   | 1.31604e4   | 418.70468 | 49.1330 |
| 4   | 9.781      | BB | 0.2924   | 227.05817   | 12.18659  | 0.8477  |

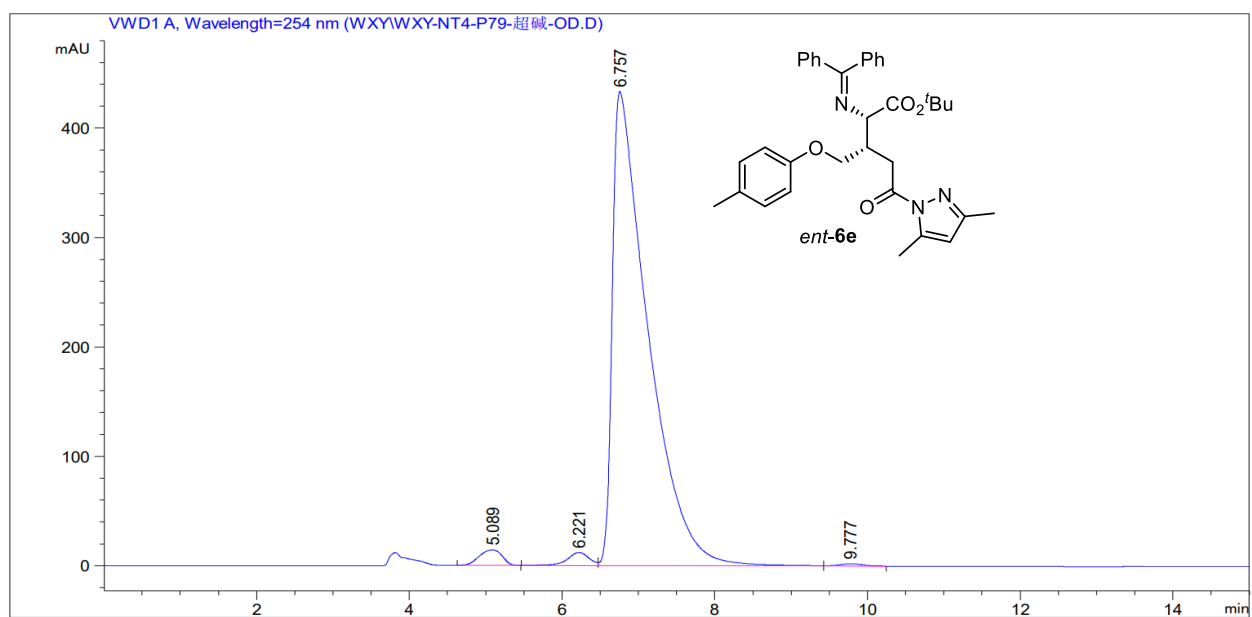

| 峰 # | 保留时间 [min] | 类型 | 峰宽 [min] | 峰面积 [mAU*s] | 峰高 [mAU]  | 峰面积 %   |
|-----|------------|----|----------|-------------|-----------|---------|
| 1   | 5.089      | BB | 0.3402   | 293.04715   | 14.17403  | 2.0103  |
| 2   | 6.221      | BV | 0.2992   | 238.88649   | 12.00224  | 1.6388  |
| 3   | 6.757      | VB | 0.4582   | 1.40078e4   | 433.30350 | 96.0946 |
| 4   | 9.777      | BB | 0.2913   | 37.35451    | 1.98687   | 0.2563  |



**6g:** Chiralpak OD-H, Hexane/2-Propanol = 90:10, flow rate 0.8 mL/min, 254 nm, 97% ee

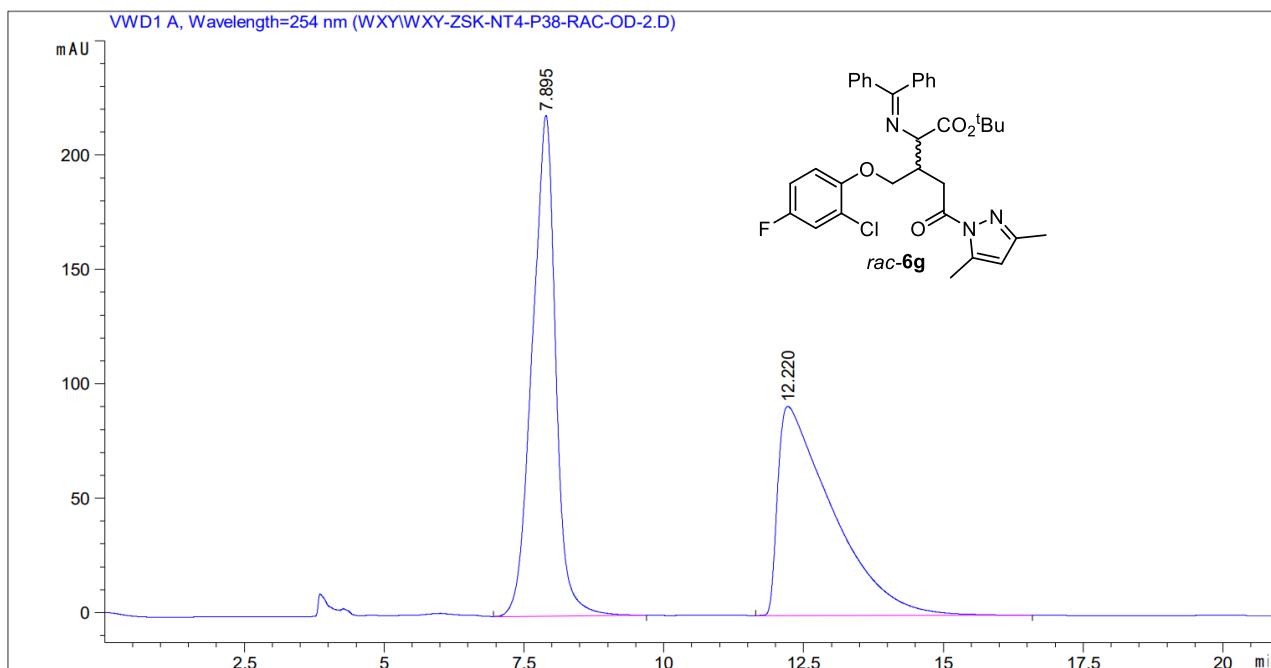

| 峰 # | 保留时间 [min] | 类型 | 峰宽 [min] | 峰面积 [mAU*s] | 峰高 [mAU]  | 峰面积 %   |
|-----|------------|----|----------|-------------|-----------|---------|
| 1   | 7.895      | BB | 0.4148   | 6373.45361  | 218.85530 | 50.6583 |
| 2   | 12.220     | BB | 0.9603   | 6207.81201  | 91.40847  | 49.3417 |

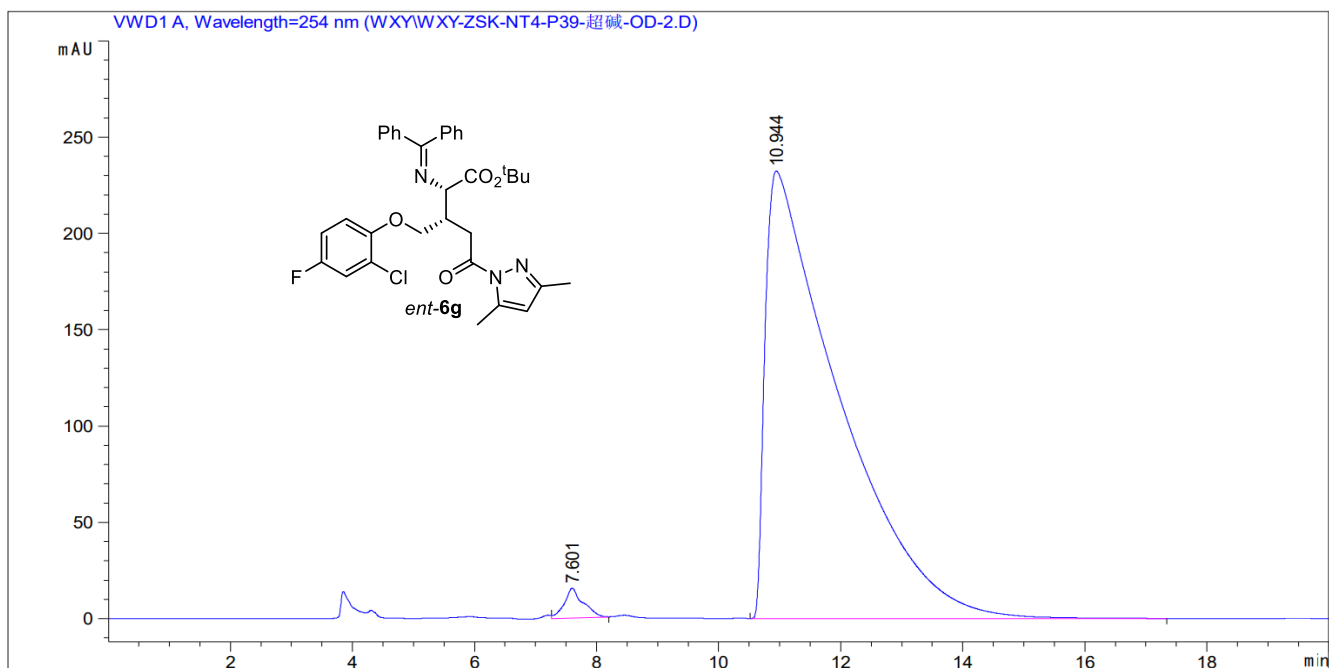

| 峰 # | 保留时间 [min] | 类型 | 峰宽 [min] | 峰面积 [mAU*s] | 峰高 [mAU]  | 峰面积 %   |
|-----|------------|----|----------|-------------|-----------|---------|
| 1   | 7.601      | VB | 0.2884   | 328.78769   | 15.44394  | 1.6537  |
| 2   | 10.944     | BB | 1.1282   | 1.95537e4   | 232.25250 | 98.3463 |

**6h:** Chiralpak OD-H, Hexane/2-Propanol = 90:10, flow rate 0.8 mL/min, 254 nm, 97% *ee*

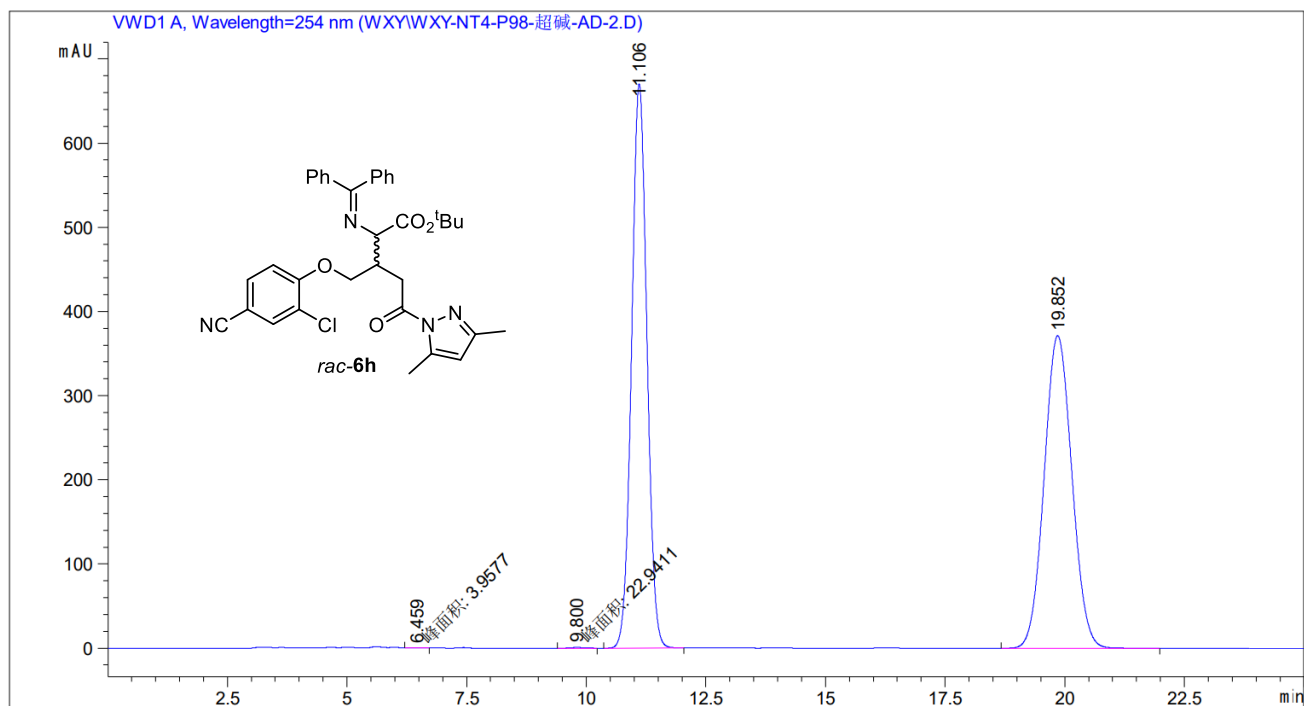

| 峰 # | 保留时间 [min] | 类型 | 峰宽 [min] | 峰面积 [mAU*s] | 峰高 [mAU]   | 峰面积 %   |
|-----|------------|----|----------|-------------|------------|---------|
| 1   | 6.459      | MM | 0.2389   | 3.95770     | 2.76146e-1 | 0.0132  |
| 2   | 9.800      | MM | 0.3883   | 22.94106    | 9.84555e-1 | 0.0767  |
| 3   | 11.106     | BB | 0.3453   | 1.48993e4   | 670.25659  | 49.8457 |
| 4   | 19.852     | BB | 0.6291   | 1.49647e4   | 371.35327  | 50.0643 |

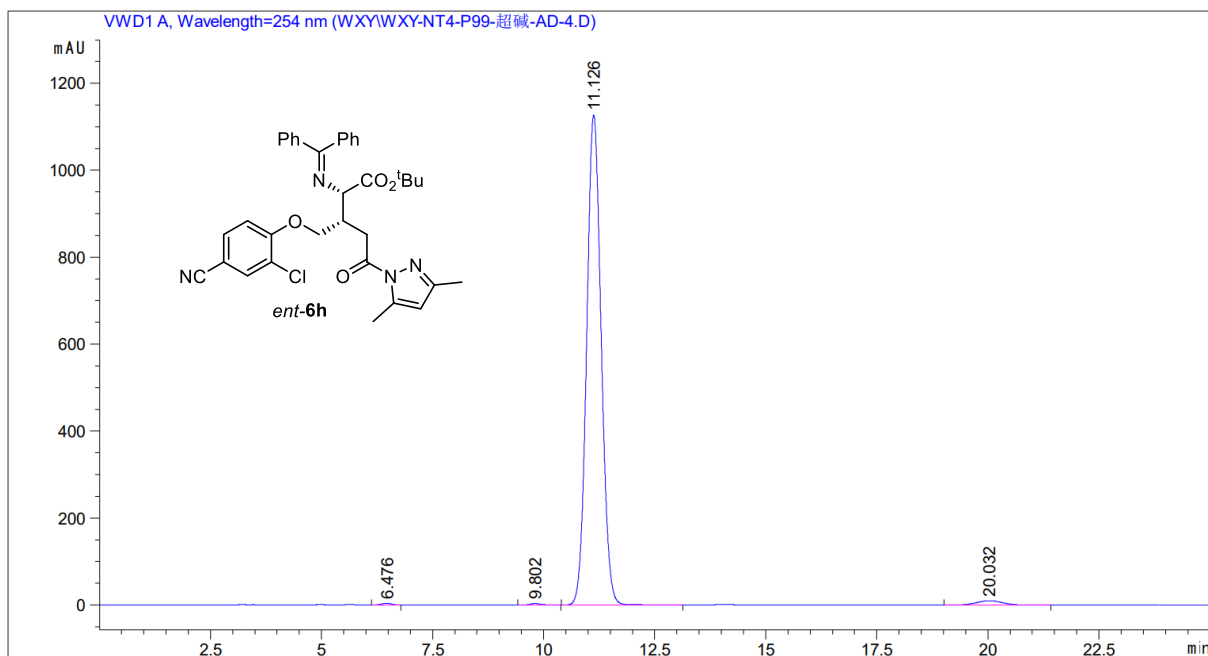

| 峰 # | 保留时间 [min] | 类型 | 峰宽 [min] | 峰面积 [mAU*s] | 峰高 [mAU]   | 峰面积 %   |
|-----|------------|----|----------|-------------|------------|---------|
| 1   | 6.476      | BB | 0.2655   | 57.07695    | 3.49470    | 0.2191  |
| 2   | 9.802      | BB | 0.2496   | 59.40896    | 3.54274    | 0.2281  |
| 3   | 11.126     | BB | 0.3522   | 2.55224e4   | 1127.07324 | 97.9909 |
| 4   | 20.032     | BB | 0.6247   | 406.81039   | 10.04040   | 1.5619  |

6i: Chiralpak OD-H, Hexane/2-Propanol = 93:7, flow rate 1.0 mL/min, 254 nm, 98% ee

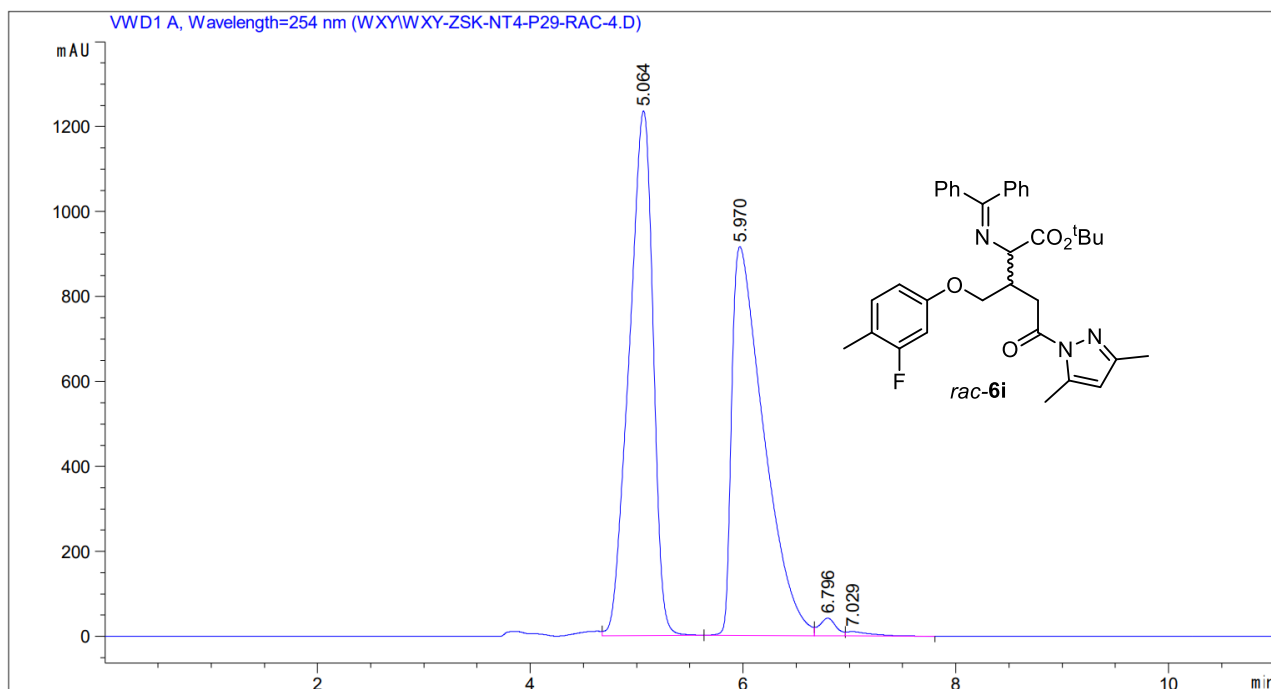

| 峰 # | 保留时间 [min] | 类型 | 峰宽 [min] | 峰面积 [mAU*s] | 峰高 [mAU]   | 峰面积 %   |
|-----|------------|----|----------|-------------|------------|---------|
| 1   | 5.064      | VB | 0.2366   | 1.93390e4   | 1235.35608 | 49.4970 |
| 2   | 5.970      | BV | 0.3108   | 1.91259e4   | 915.10071  | 48.9517 |
| 3   | 6.796      | VV | 0.1592   | 447.43439   | 41.69141   | 1.1452  |
| 4   | 7.029      | VB | 0.2155   | 158.65451   | 10.03292   | 0.4061  |

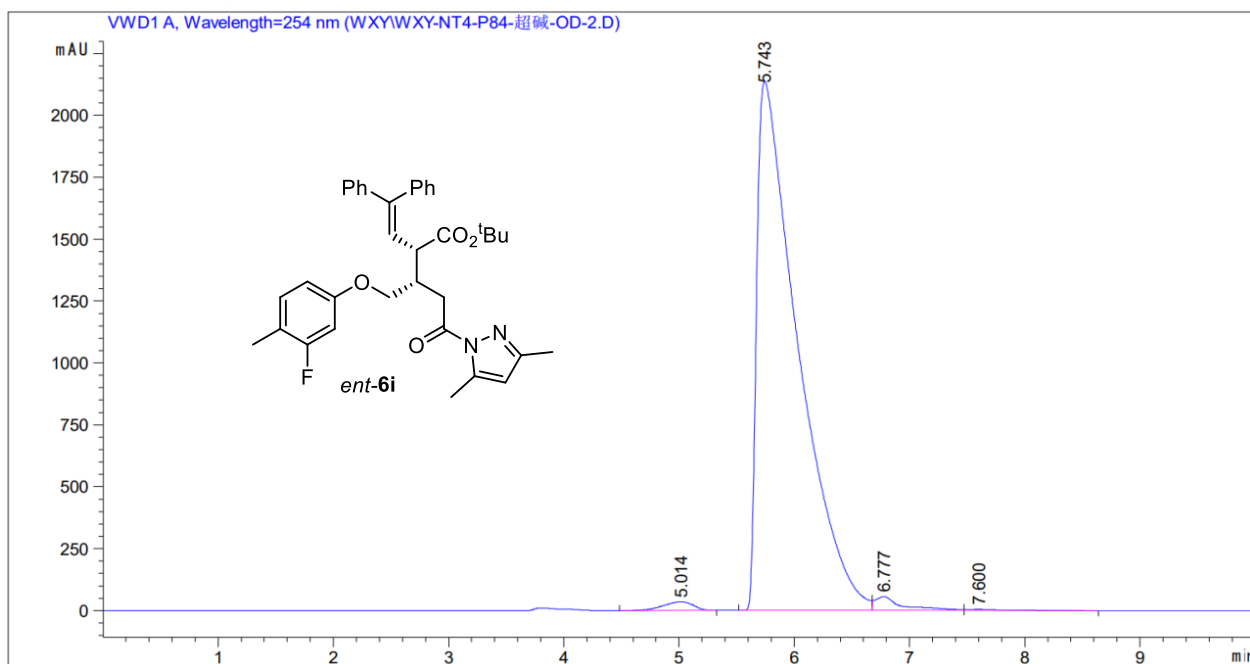

| 峰 # | 保留时间 [min] | 类型 | 峰宽 [min] | 峰面积 [mAU*s] | 峰高 [mAU]   | 峰面积 %   |
|-----|------------|----|----------|-------------|------------|---------|
| 1   | 5.014      | BB | 0.2919   | 624.81549   | 34.72789   | 1.1525  |
| 2   | 5.743      | BV | 0.3562   | 5.25749e4   | 2135.64355 | 96.9731 |
| 3   | 6.777      | VV | 0.2310   | 936.22681   | 55.45214   | 1.7268  |
| 4   | 7.600      | VB | 0.2660   | 80.04018    | 4.38316    | 0.1476  |

6j: Chiralpak OD-H, Hexane/2-Propanol = 97:3, flow rate 0.8 mL/min, 254 nm, 98% ee

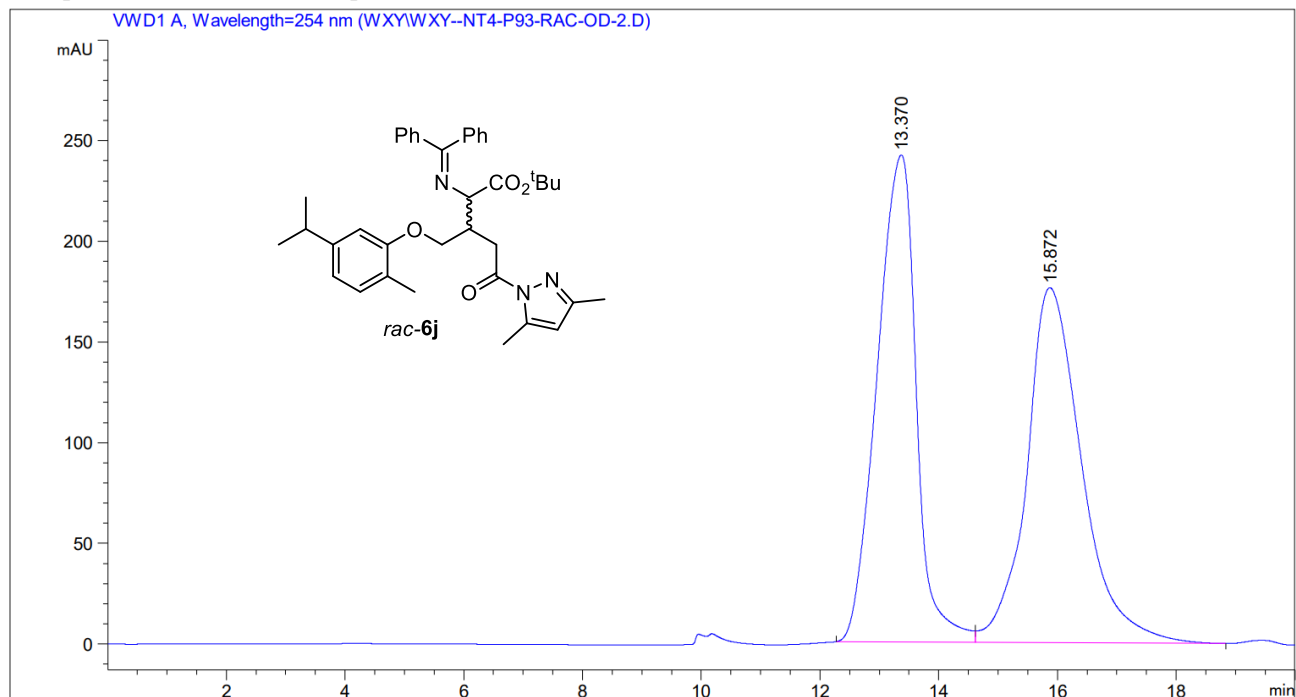

| 峰 # | 保留时间 [min] | 类型 | 峰宽 [min] | 峰面积 [mAU*s] | 峰高 [mAU]  | 峰面积 %   |
|-----|------------|----|----------|-------------|-----------|---------|
| 1   | 13.370     | BV | 0.6690   | 1.10710e4   | 241.88066 | 48.5853 |
| 2   | 15.872     | VB | 0.9782   | 1.13490e4   | 176.25839 | 49.8056 |
| 3   | 20.529     | BB | 0.3527   | 366.66870   | 15.80240  | 1.6091  |

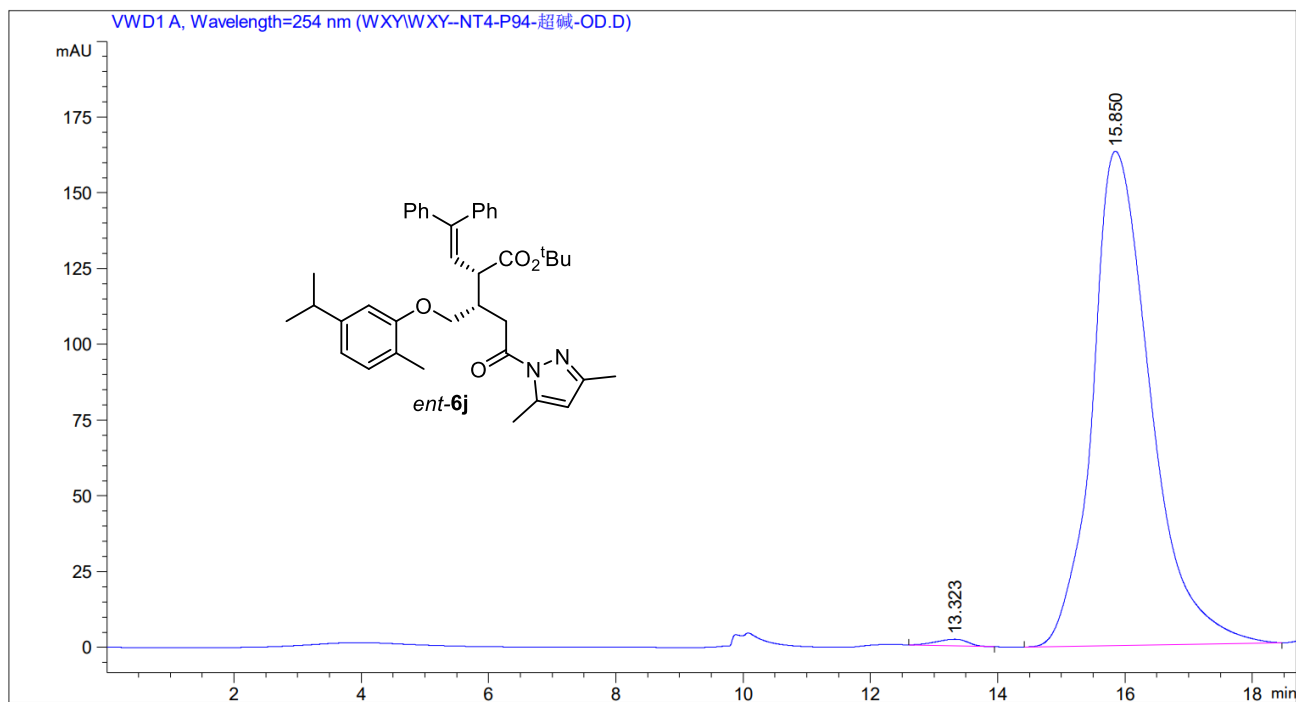

| 峰 # | 保留时间 [min] | 类型 | 峰宽 [min] | 峰面积 [mAU*s] | 峰高 [mAU]  | 峰面积 %   |
|-----|------------|----|----------|-------------|-----------|---------|
| 1   | 13.323     | BB | 0.5116   | 74.61986    | 2.17845   | 0.7025  |
| 2   | 15.850     | BB | 0.9591   | 1.03313e4   | 163.08000 | 97.2632 |
| 3   | 20.389     | VB | 0.3448   | 216.08324   | 9.41418   | 2.0343  |

**6k:** Chiralpak OD-H, Hexane/2-Propanol = 80:20, flow rate 0.9 mL/min, 254 nm, 86% ee

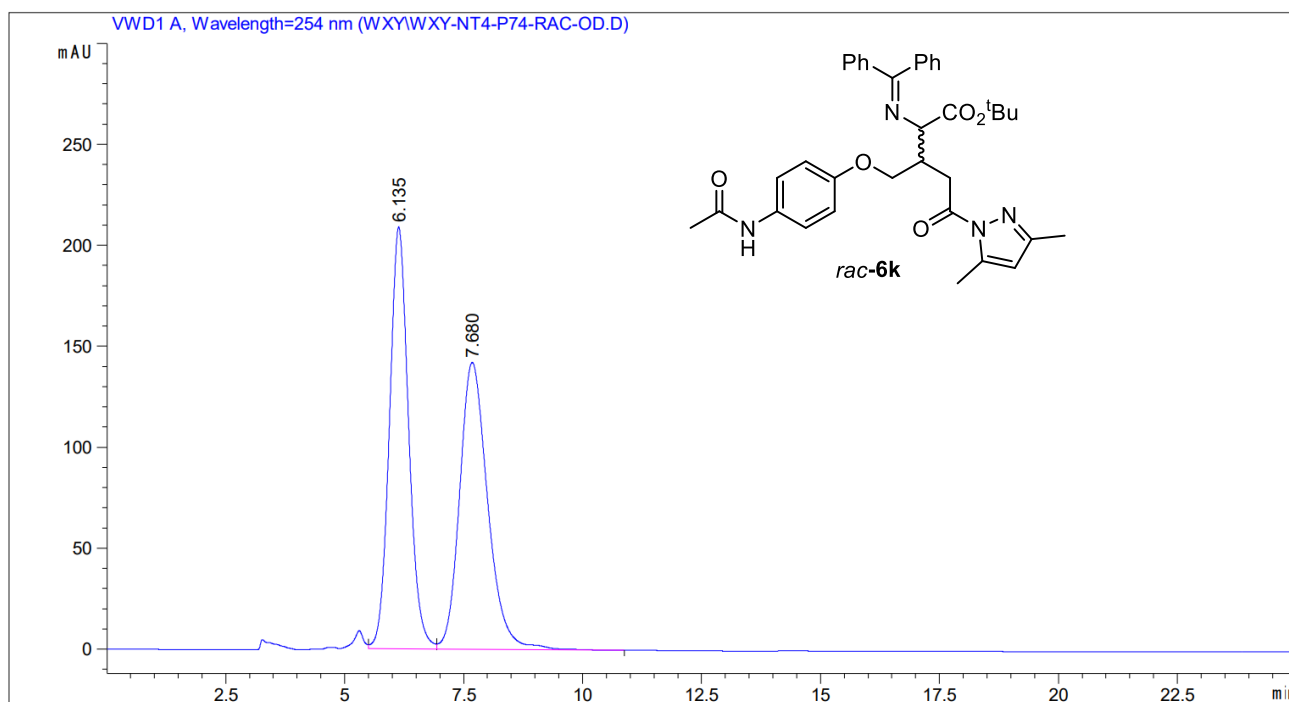

| 峰 # | 保留时间 [min] | 类型 | 峰宽 [min] | 峰面积 [mAU*s] | 峰高 [mAU]  | 峰面积 %   |
|-----|------------|----|----------|-------------|-----------|---------|
| 1   | 6.135      | VV | 0.4291   | 5858.65186  | 208.94930 | 50.0136 |
| 2   | 7.680      | VB | 0.6298   | 5855.47119  | 142.07472 | 49.9864 |

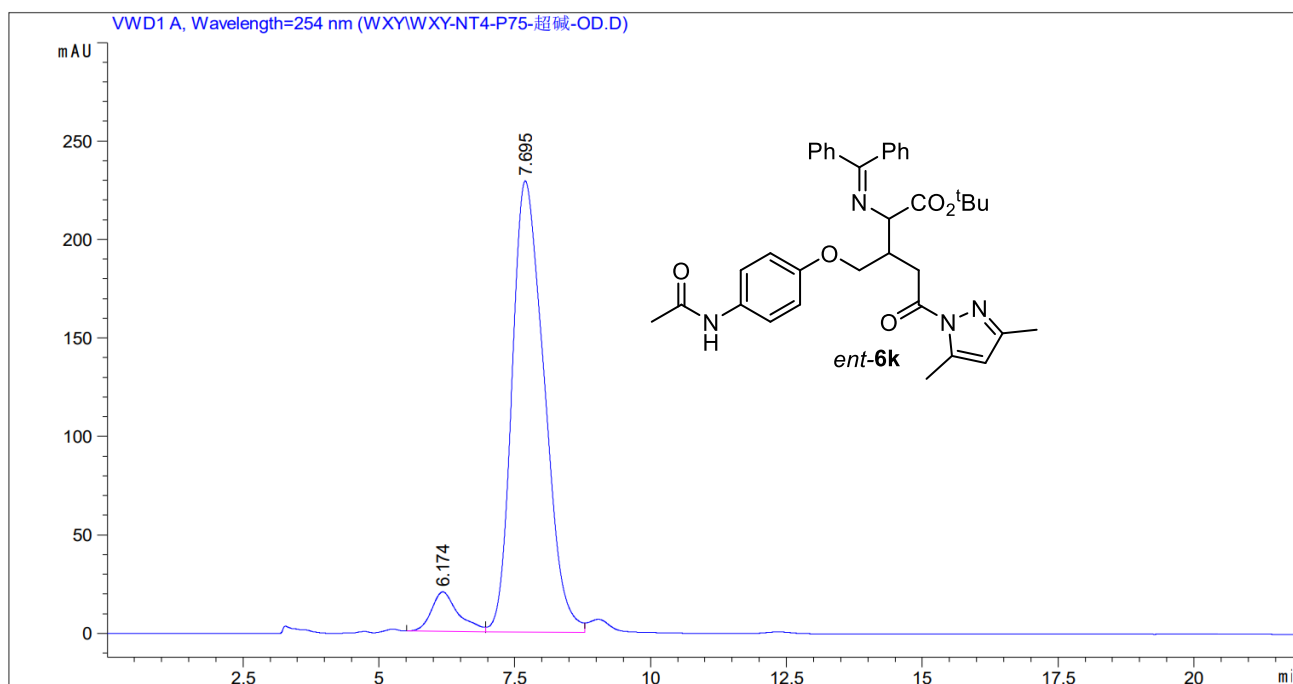

| 峰 # | 保留时间 [min] | 类型 | 峰宽 [min] | 峰面积 [mAU*s] | 峰高 [mAU]  | 峰面积 %   |
|-----|------------|----|----------|-------------|-----------|---------|
| 1   | 6.174      | BV | 0.5042   | 687.91565   | 20.05425  | 6.8167  |
| 2   | 7.695      | VV | 0.6770   | 9403.65820  | 229.04305 | 93.1833 |

6I: Chiralpak OD-H, Hexane/2-Propanol = 90:10, flow rate 0.8 mL/min, 254 nm, 98% ee

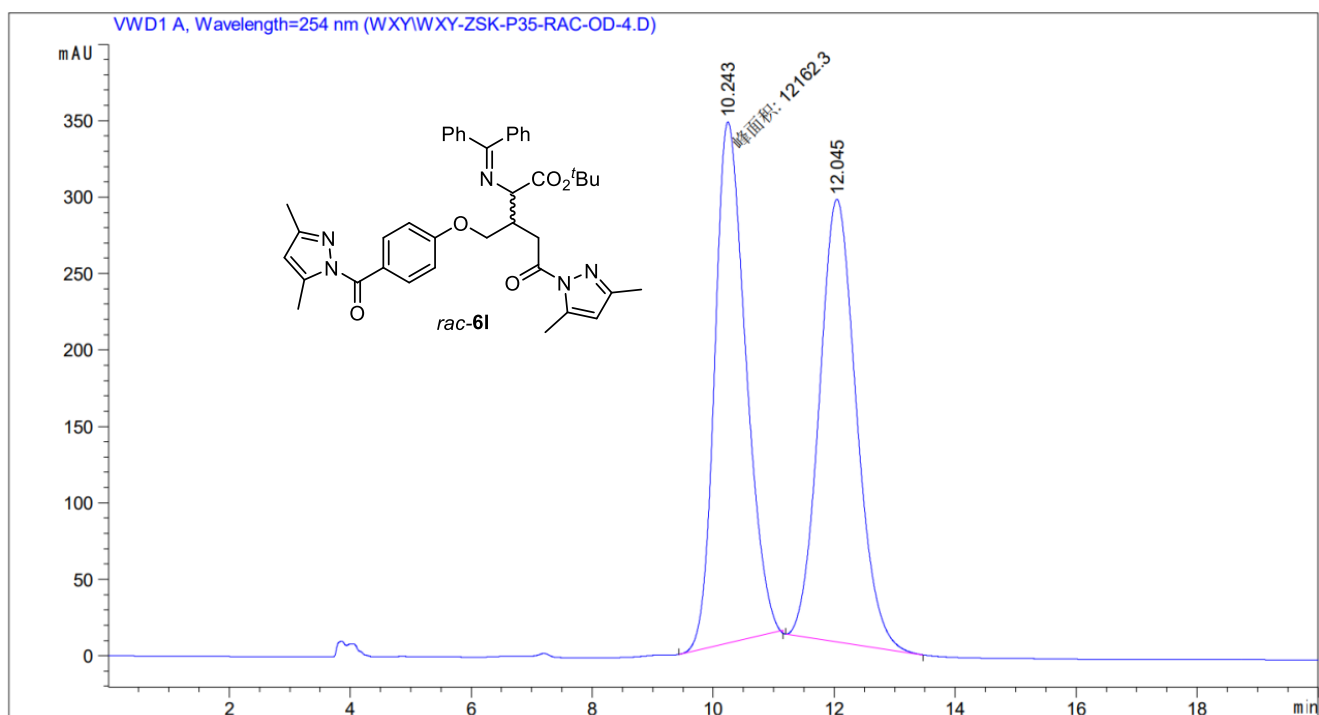

| 峰 # | 保留时间 [min] | 类型 | 峰宽 [min] | 峰面积 [mAU*s] | 峰高 [mAU]  | 峰面积 %   |
|-----|------------|----|----------|-------------|-----------|---------|
| 1   | 10.243     | MM | 0.5945   | 1.21623e4   | 340.97479 | 49.7419 |
| 2   | 12.045     | BB | 0.6530   | 1.22885e4   | 289.64008 | 50.2581 |

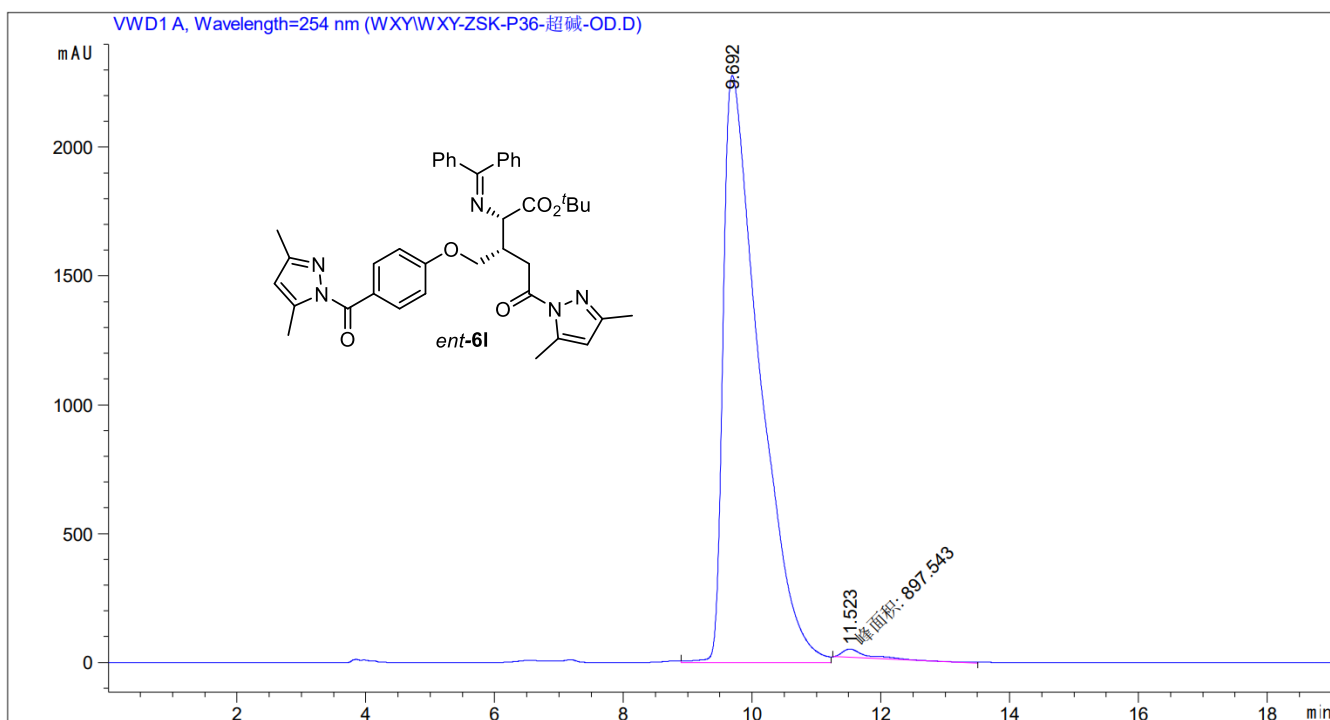

| 峰 # | 保留时间 [min] | 类型 | 峰宽 [min] | 峰面积 [mAU*s] | 峰高 [mAU]   | 峰面积 %   |
|-----|------------|----|----------|-------------|------------|---------|
| 1   | 9.692      | VV | 0.5601   | 8.86681e4   | 2278.07129 | 98.9979 |
| 2   | 11.523     | MM | 0.4619   | 897.54272   | 32.38932   | 1.0021  |

**6m**: Chiralpak AD-H, Hexane/2-Propanol = 90:10, flow rate 1.0 mL/min, 254 nm, 93% *ee*

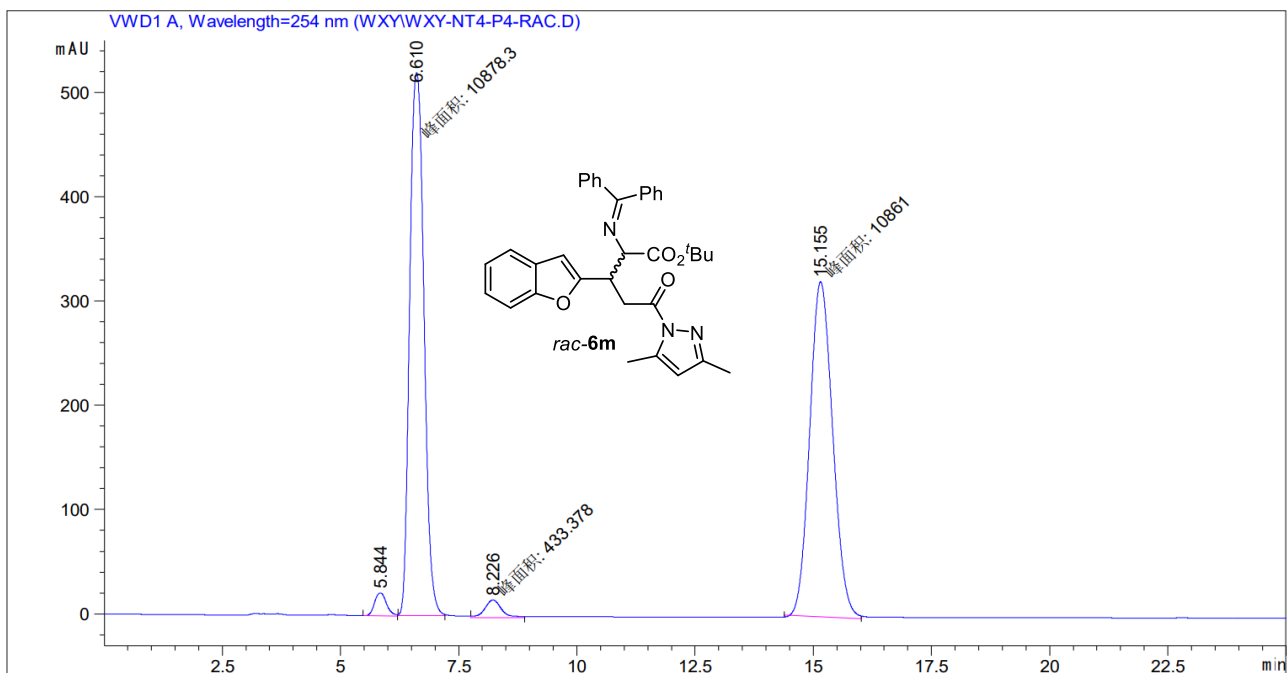

| 峰 # | 保留时间 [min] | 类型 | 峰宽 [min] | 峰面积 [mAU*s] | 峰高 [mAU]  | 峰面积 %   |
|-----|------------|----|----------|-------------|-----------|---------|
| 1   | 5.844      | BV | 0.2761   | 384.23334   | 21.96539  | 1.7034  |
| 2   | 6.610      | MM | 0.3482   | 1.08783e4   | 520.62128 | 48.2261 |
| 3   | 8.226      | MM | 0.4212   | 433.37790   | 17.14760  | 1.9213  |
| 4   | 15.155     | MM | 0.5634   | 1.08610e4   | 321.28571 | 48.1493 |

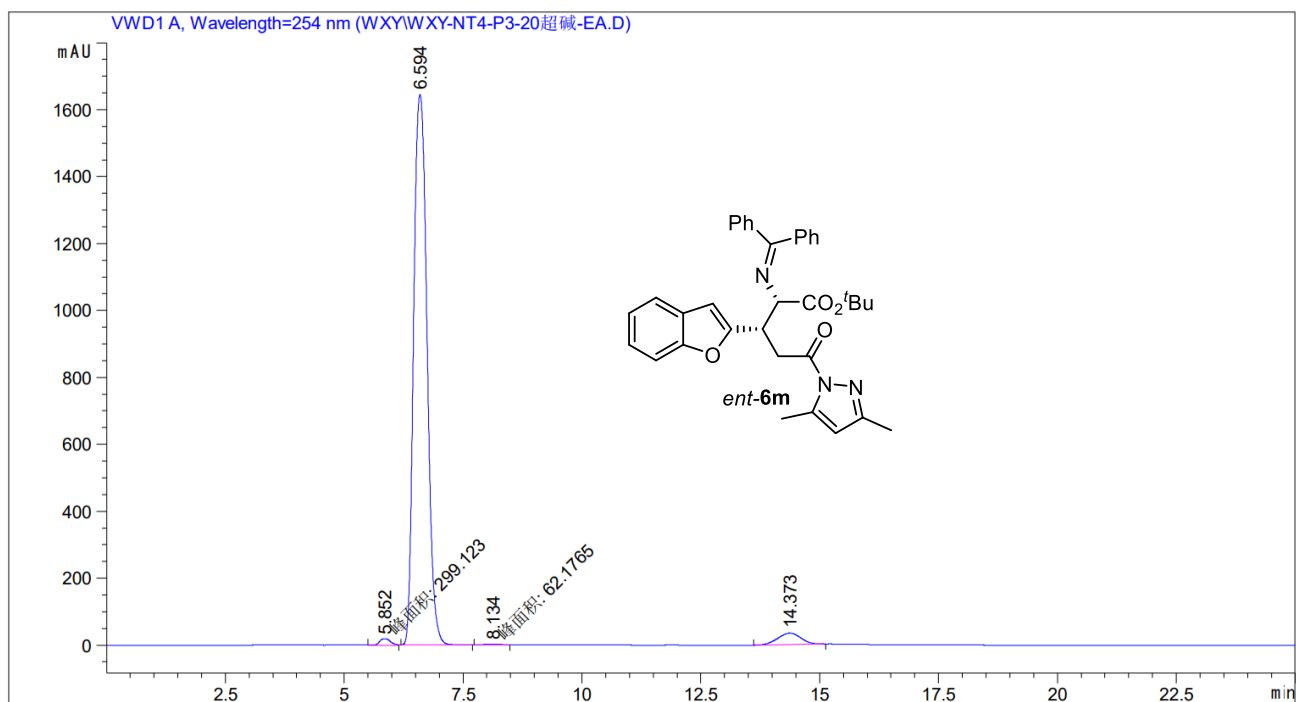

| 峰 # | 保留时间 [min] | 类型 | 峰宽 [min] | 峰面积 [mAU*s] | 峰高 [mAU]   | 峰面积 %   |
|-----|------------|----|----------|-------------|------------|---------|
| 1   | 5.852      | MM | 0.2686   | 299.12277   | 18.55995   | 0.8931  |
| 2   | 6.594      | VB | 0.3138   | 3.19790e4   | 1644.93250 | 95.4859 |
| 3   | 8.134      | MM | 0.3696   | 62.17649    | 2.80348    | 0.1857  |
| 4   | 14.373     | BB | 0.5298   | 1150.50146  | 34.16873   | 3.4353  |

**6n**: Chiralpak AD-H, Hexane/2-Propanol = 90:10, flow rate 1.0 mL/min, 254, 97% ee

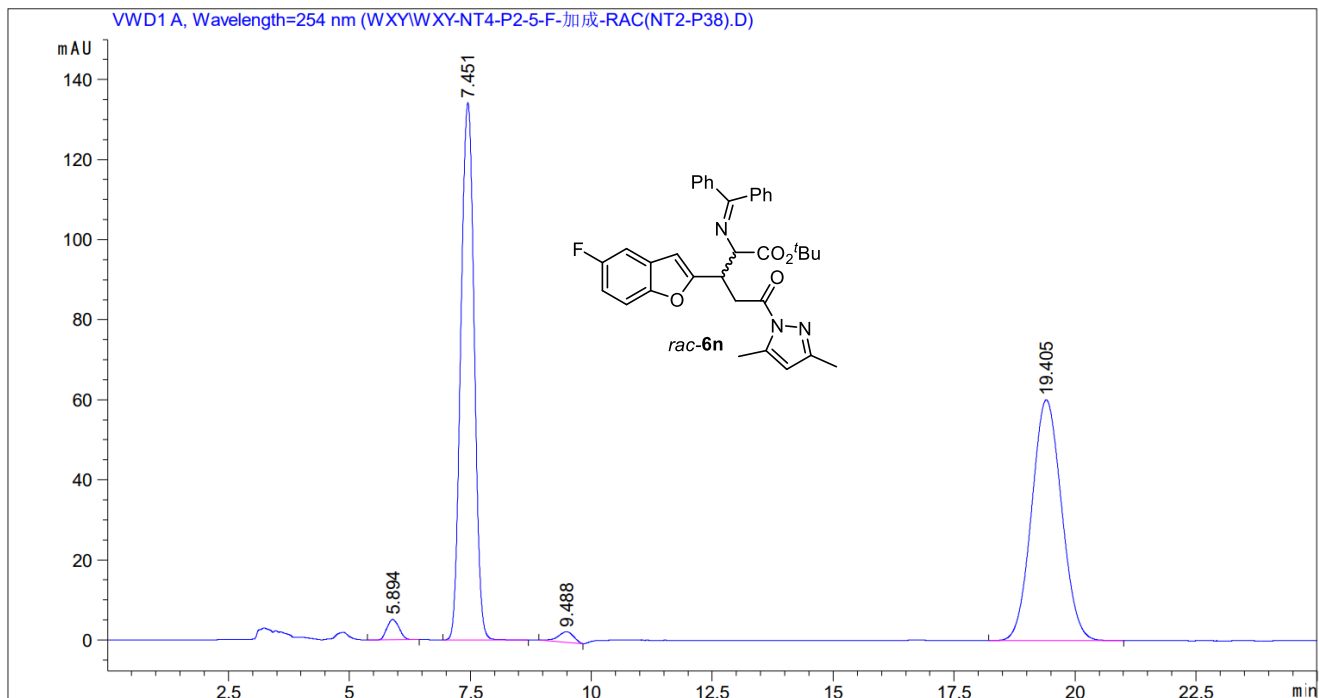

| 峰 # | 保留时间 [min] | 类型 | 峰宽 [min] | 峰面积 [mAU*s] | 峰高 [mAU]  | 峰面积 %   |
|-----|------------|----|----------|-------------|-----------|---------|
| 1   | 5.894      | BB | 0.2888   | 90.59968    | 5.11068   | 1.7046  |
| 2   | 7.451      | BB | 0.3107   | 2583.14551  | 134.14005 | 48.5999 |
| 3   | 9.488      | BB | 0.3449   | 58.08899    | 2.62747   | 1.0929  |
| 4   | 19.405     | BB | 0.6699   | 2583.29126  | 60.16844  | 48.6026 |

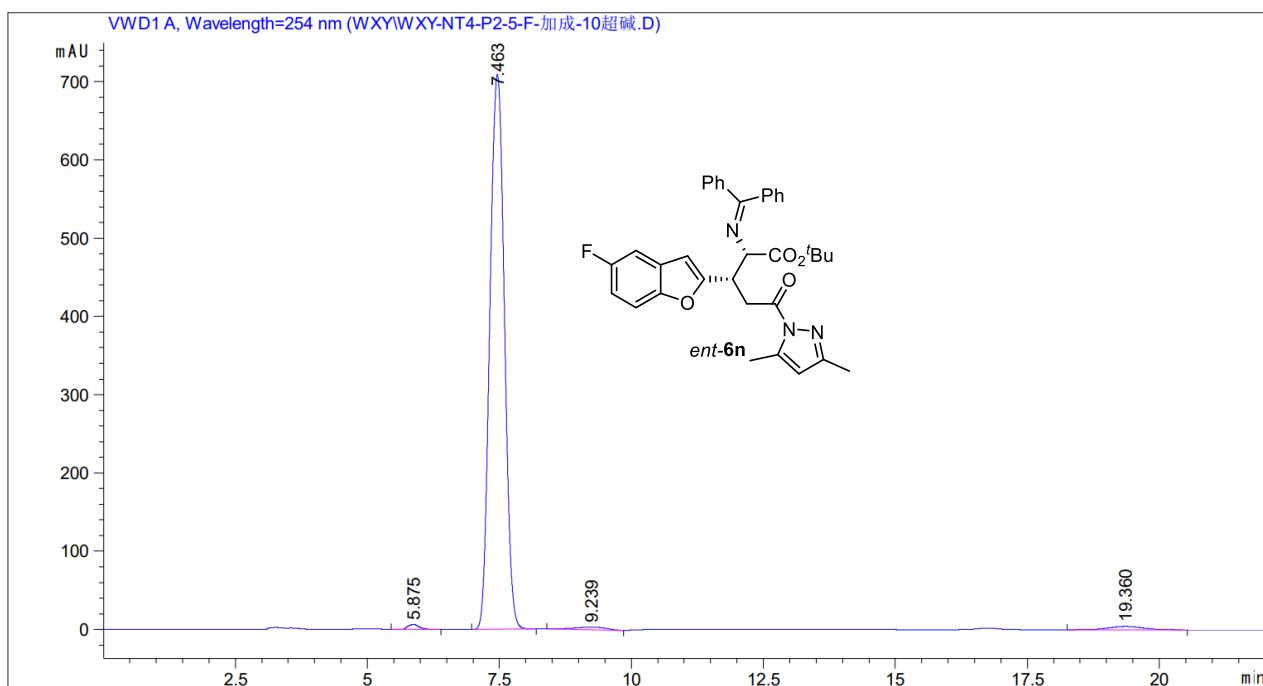

| 峰 # | 保留时间 [min] | 类型 | 峰宽 [min] | 峰面积 [mAU*s] | 峰高 [mAU]  | 峰面积 %   |
|-----|------------|----|----------|-------------|-----------|---------|
| 1   | 5.875      | BB | 0.2467   | 97.69559    | 6.30933   | 0.6956  |
| 2   | 7.463      | BB | 0.3102   | 1.36213e4   | 708.95465 | 96.9810 |
| 3   | 9.239      | BB | 0.6418   | 150.01370   | 3.53694   | 1.0681  |
| 4   | 19.360     | BB | 0.6346   | 176.31496   | 4.14180   | 1.2553  |

6o: Chiralpak AD-H, Hexane/2-Propanol = 90:10, flow rate 1.0 mL/min, 254 nm, 98% ee

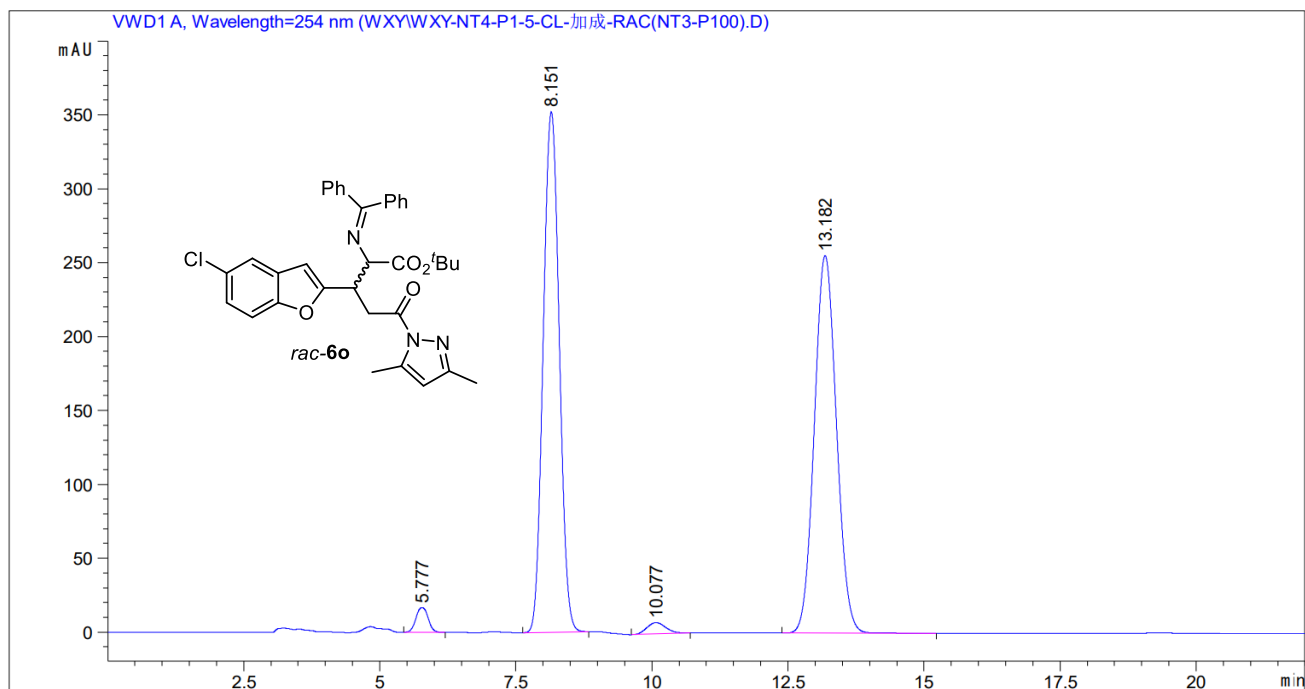

| 峰 # | 保留时间 [min] | 类型 | 峰宽 [min] | 峰面积 [mAU*s] | 峰高 [mAU]  | 峰面积 %   |
|-----|------------|----|----------|-------------|-----------|---------|
| 1   | 5.777      | BB | 0.2469   | 258.18765   | 16.74746  | 1.7415  |
| 2   | 8.151      | BB | 0.3241   | 7187.85352  | 352.15710 | 48.4814 |
| 3   | 10.077     | BB | 0.3851   | 186.07520   | 7.64001   | 1.2551  |
| 4   | 13.182     | BB | 0.4405   | 7193.88721  | 255.49200 | 48.5221 |

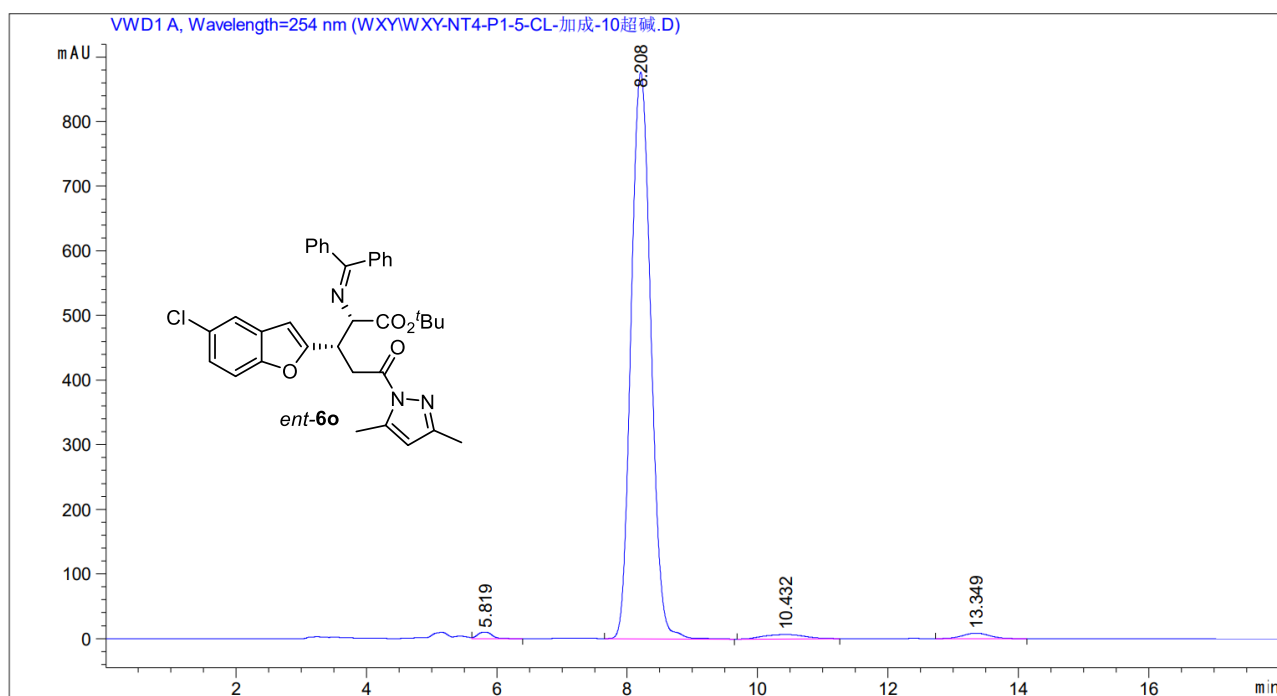

| 峰 # | 保留时间 [min] | 类型 | 峰宽 [min] | 峰面积 [mAU*s] | 峰高 [mAU]  | 峰面积 %   |
|-----|------------|----|----------|-------------|-----------|---------|
| 1   | 5.819      | VB | 0.2396   | 147.56123   | 9.97637   | 0.7729  |
| 2   | 8.208      | BB | 0.3342   | 1.84205e4   | 876.48389 | 96.4862 |
| 3   | 10.432     | BB | 0.7181   | 286.16037   | 6.58313   | 1.4989  |
| 4   | 13.349     | BB | 0.4407   | 237.11420   | 8.38959   | 1.2420  |

6p: Chiralpak AD-H, Hexane/2-Propanol = 90:10, flow rate 1.0 mL/min, 254 nm, 98% ee

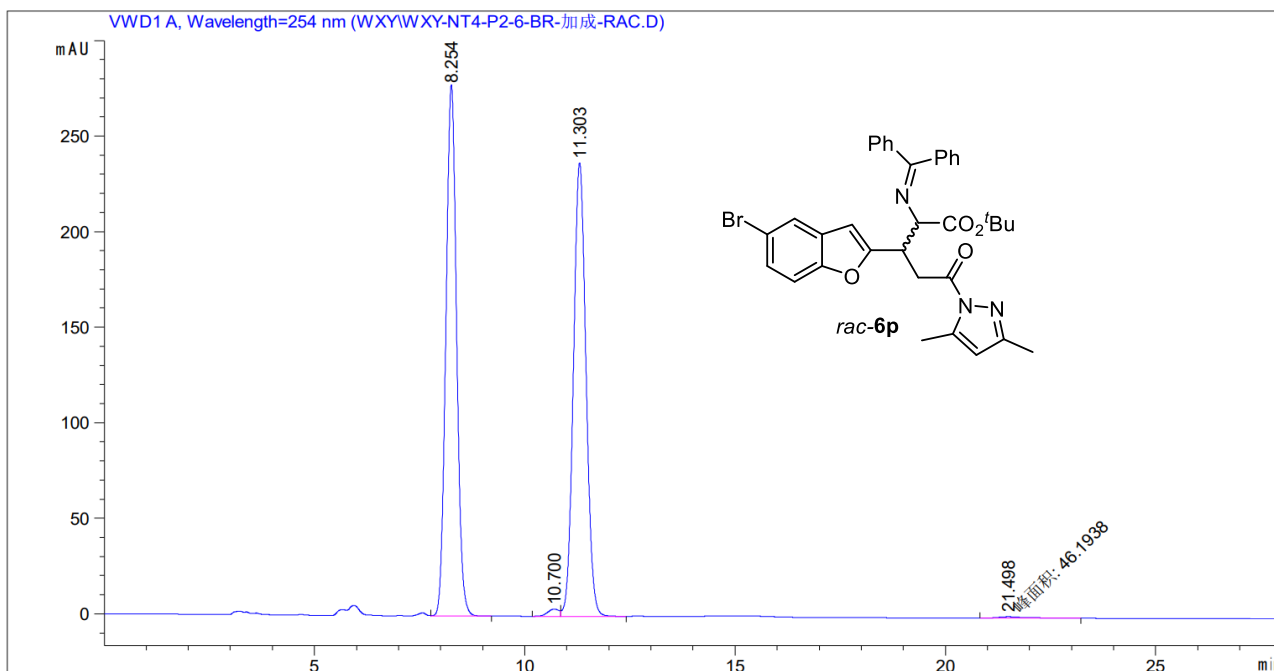

| 峰 # | 保留时间 [min] | 类型 | 峰宽 [min] | 峰面积 [mAU*s] | 峰高 [mAU]   | 峰面积 %   |
|-----|------------|----|----------|-------------|------------|---------|
| 1   | 8.254      | VB | 0.2739   | 4906.62744  | 277.95935  | 49.3384 |
| 2   | 10.700     | BV | 0.2841   | 70.27888    | 3.79381    | 0.7067  |
| 3   | 11.303     | VB | 0.3220   | 4921.73682  | 237.24454  | 49.4904 |
| 4   | 21.498     | MM | 0.9241   | 46.19381    | 8.33150e-1 | 0.4645  |

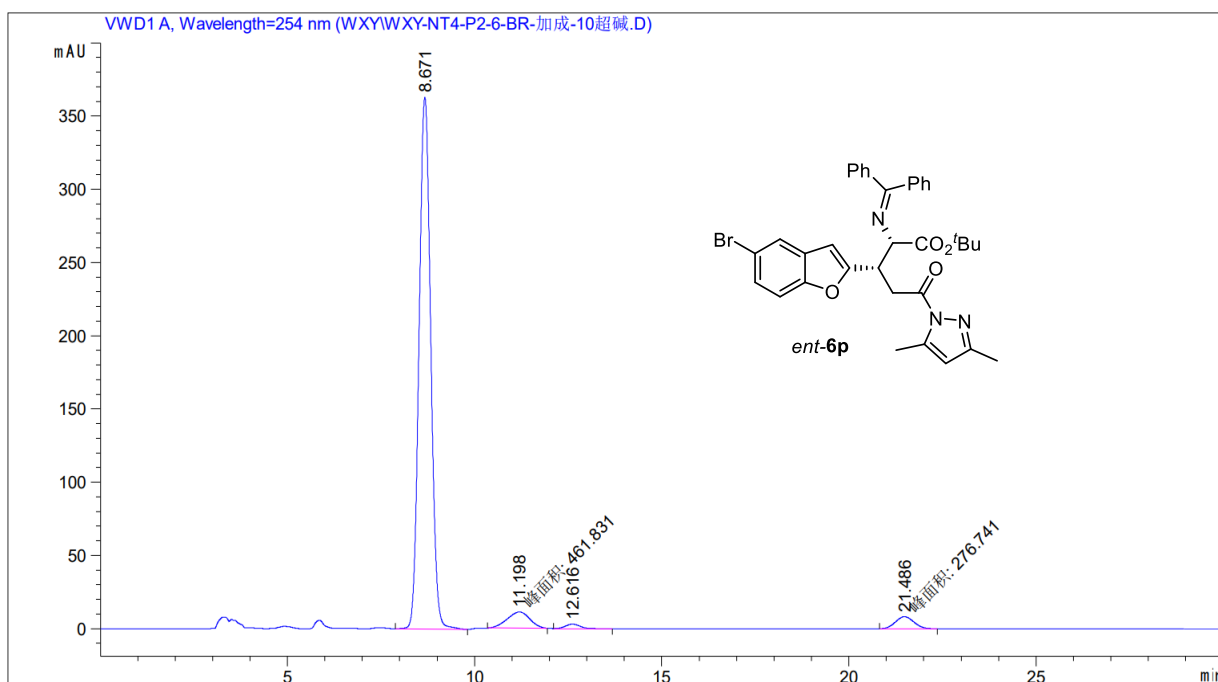

| 峰 # | 保留时间 [min] | 类型 | 峰宽 [min] | 峰面积 [mAU*s] | 峰高 [mAU]  | 峰面积 %   |
|-----|------------|----|----------|-------------|-----------|---------|
| 1   | 8.671      | BB | 0.3401   | 7845.74463  | 363.04828 | 90.5111 |
| 2   | 11.198     | MM | 0.6975   | 461.83093   | 11.03563  | 5.3278  |
| 3   | 12.616     | BB | 0.4262   | 83.95399    | 3.07766   | 0.9685  |
| 4   | 21.486     | MM | 0.5639   | 276.74081   | 8.17941   | 3.1926  |

6q: Chiralpak AD-H, Hexane/2-Propanol = 90:10, flow rate 1.0 mL/min, 254 nm, 94% ee

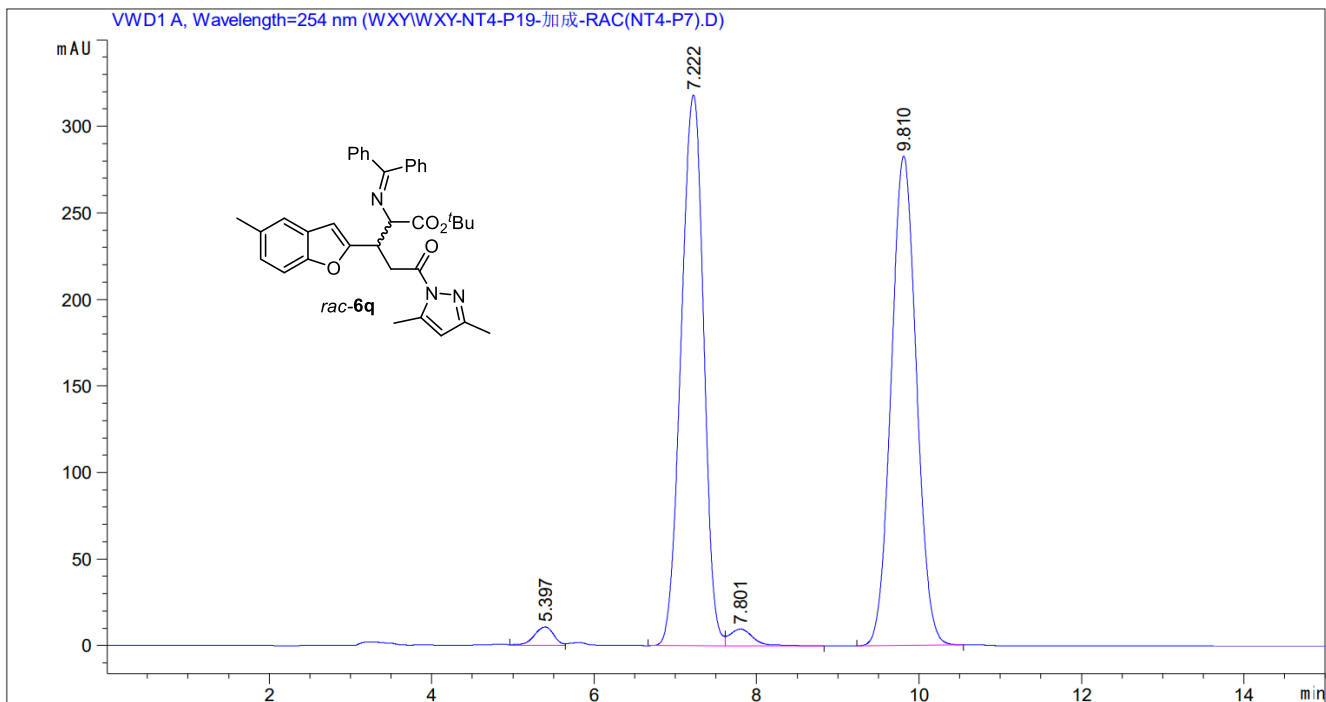

| 峰 # | 保留时间 [min] | 类型 | 峰宽 [min] | 峰面积 [mAU*s] | 峰高 [mAU]  | 峰面积 %   |
|-----|------------|----|----------|-------------|-----------|---------|
| 1   | 5.397      | VV | 0.2686   | 181.79300   | 10.67787  | 1.4438  |
| 2   | 7.222      | BV | 0.3057   | 6128.77197  | 318.17572 | 48.6749 |
| 3   | 7.801      | VB | 0.2980   | 186.53636   | 9.54449   | 1.4815  |
| 4   | 9.810      | BB | 0.3365   | 6094.13330  | 282.73517 | 48.3998 |

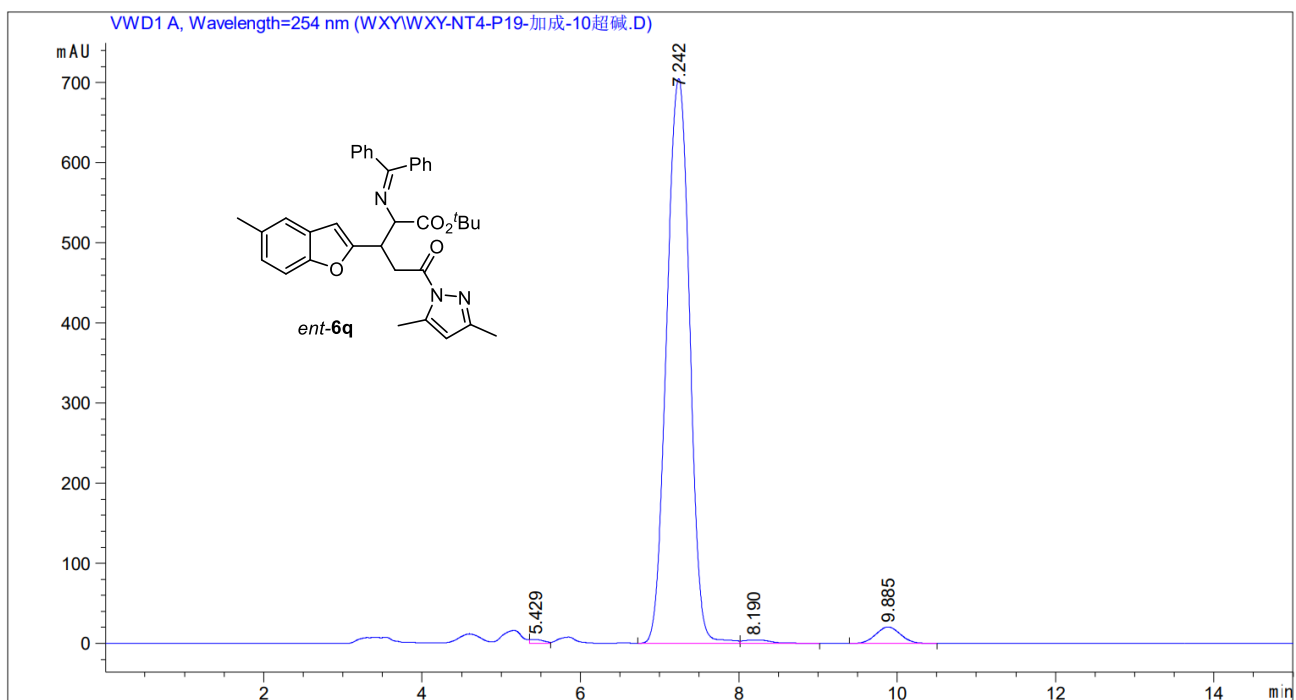

| 峰 # | 保留时间 [min] | 类型 | 峰宽 [min] | 峰面积 [mAU*s] | 峰高 [mAU]  | 峰面积 %   |
|-----|------------|----|----------|-------------|-----------|---------|
| 1   | 5.429      | VV | 0.1838   | 54.19453    | 4.49022   | 0.3671  |
| 2   | 7.242      | BV | 0.3203   | 1.41632e4   | 705.16302 | 95.9489 |
| 3   | 8.190      | VB | 0.3686   | 102.97324   | 4.28197   | 0.6976  |
| 4   | 9.885      | BB | 0.3361   | 440.82260   | 20.47915  | 2.9864  |

7d: Chiralpak AD-H, Hexane/2-Propanol = 80:20, flow rate 1.0 mL/min, 230 nm, 97% ee

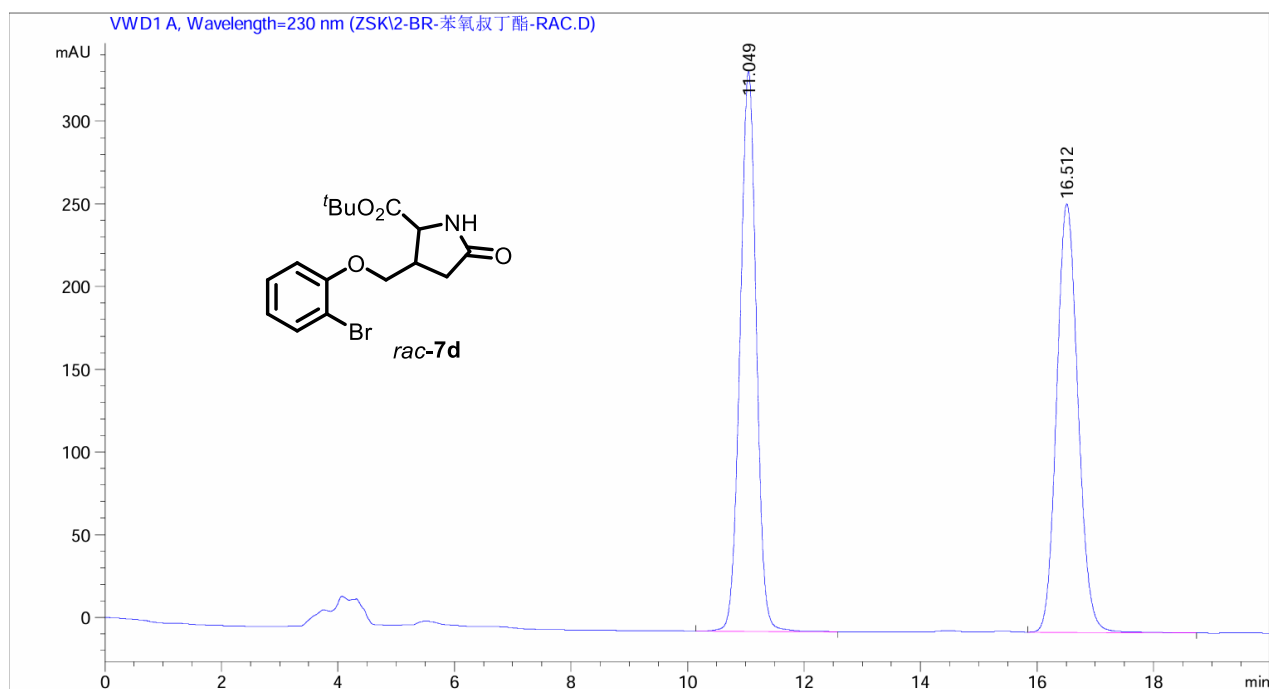

| 峰 # | 保留时间 [min] | 类型 | 峰宽 [min] | 峰面积 [mAU*s] | 峰高 [mAU]  | 峰面积 %   |
|-----|------------|----|----------|-------------|-----------|---------|
| 1   | 11.049     | BB | 0.2987   | 6553.97754  | 338.77023 | 49.8286 |
| 2   | 16.512     | BB | 0.3973   | 6599.07764  | 258.95917 | 50.1714 |

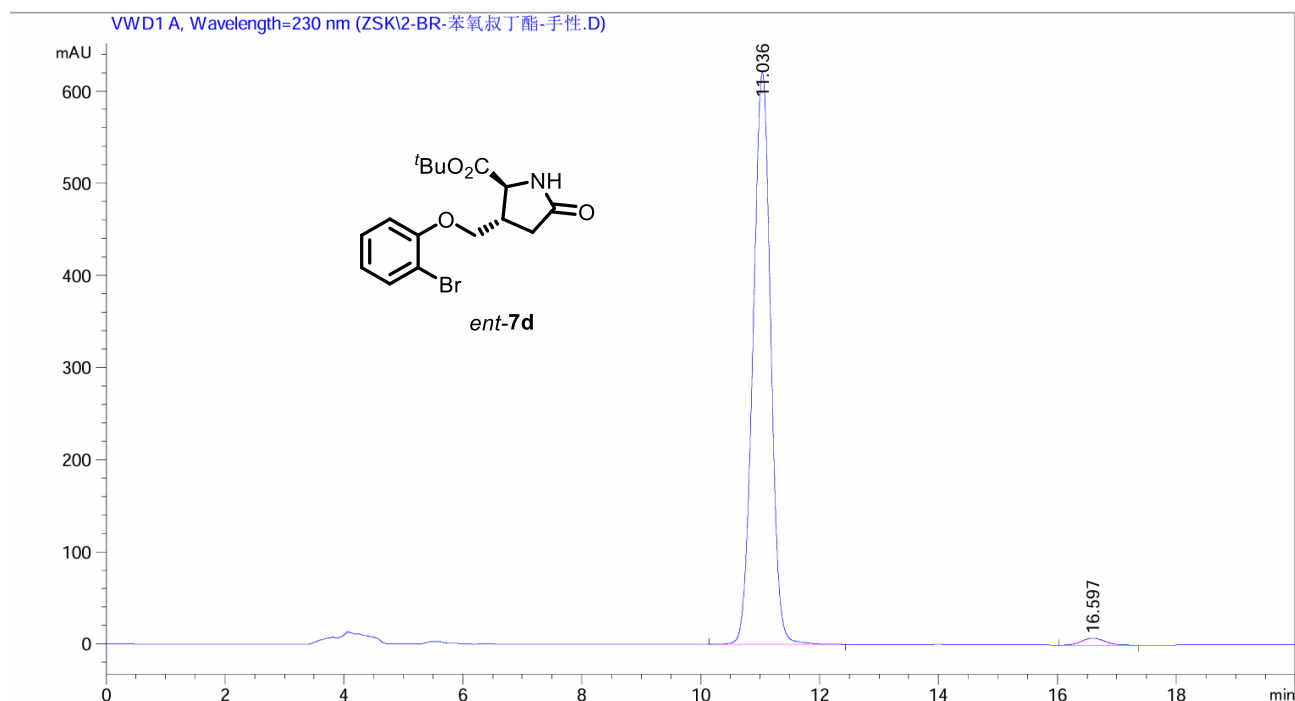

| 峰 # | 保留时间 [min] | 类型 | 峰宽 [min] | 峰面积 [mAU*s] | 峰高 [mAU]  | 峰面积 %   |
|-----|------------|----|----------|-------------|-----------|---------|
| 1   | 11.036     | BB | 0.3192   | 1.27943e4   | 621.37842 | 98.4199 |
| 2   | 16.597     | BB | 0.4198   | 205.40405   | 7.58874   | 1.5801  |

7d': Chiralpak AD-H, Hexane/2-Propanol = 80:20, flow rate 1.0 mL/min, 230 nm, 93% ee

VWD1 A, Wavelength=230 nm (ZSK12-BR-苯氧甲酯-RAC.D)

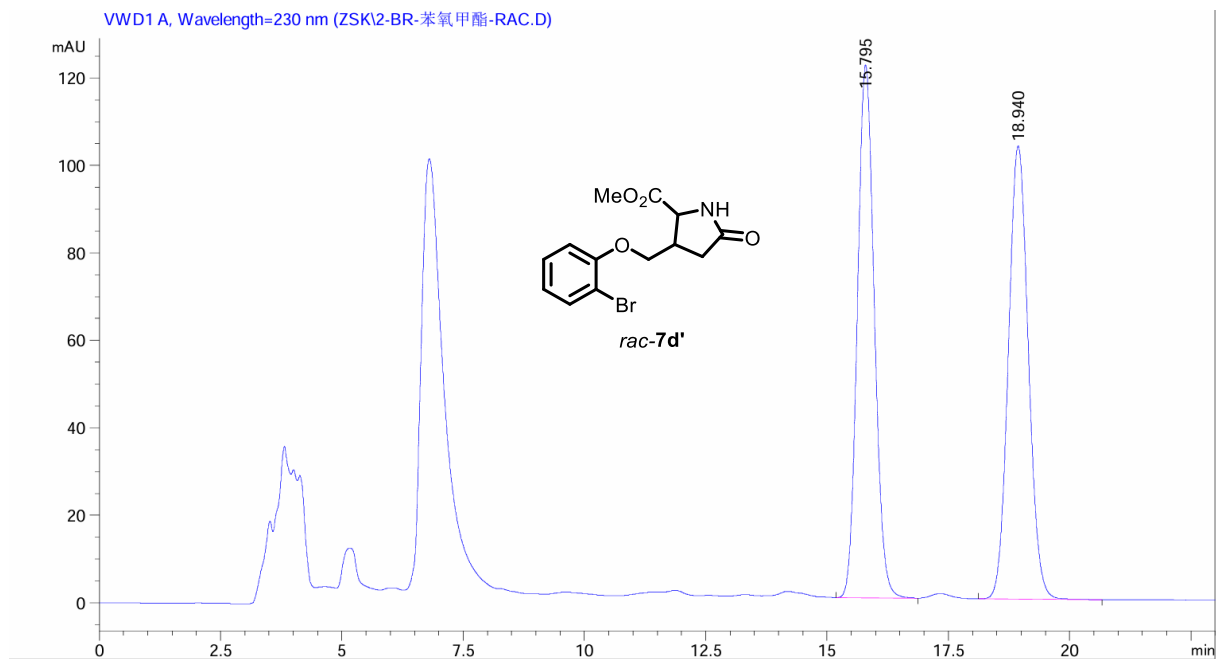

| 峰 # | 保留时间 [min] | 类型 | 峰宽 [min] | 峰面积 [mAU*s] | 峰高 [mAU]  | 峰面积 %   |
|-----|------------|----|----------|-------------|-----------|---------|
| 1   | 15.795     | BB | 0.3765   | 2950.72119  | 121.84306 | 49.8892 |
| 2   | 18.940     | BB | 0.4455   | 2963.83276  | 103.69021 | 50.1108 |

VWD1 A, Wavelength=230 nm (ZSK12-BR-苯氧甲酯-手性.D)

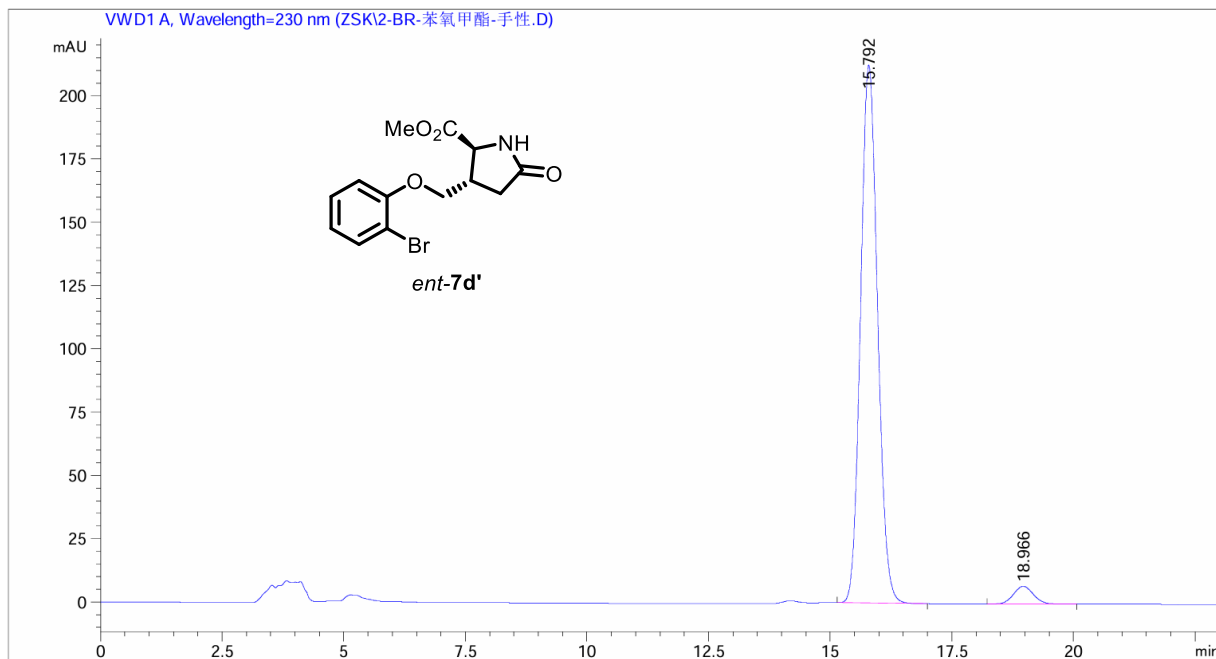

| 峰 # | 保留时间 [min] | 类型 | 峰宽 [min] | 峰面积 [mAU*s] | 峰高 [mAU]  | 峰面积 %   |
|-----|------------|----|----------|-------------|-----------|---------|
| 1   | 15.792     | BB | 0.3780   | 5155.19385  | 212.53491 | 96.2389 |
| 2   | 18.966     | BB | 0.4432   | 201.46959   | 7.03337   | 3.7611  |

7h: Chiralpak AD-H, Hexane/2-Propanol = 80:20, flow rate 1.0 mL/min, 230 nm, 98% ee

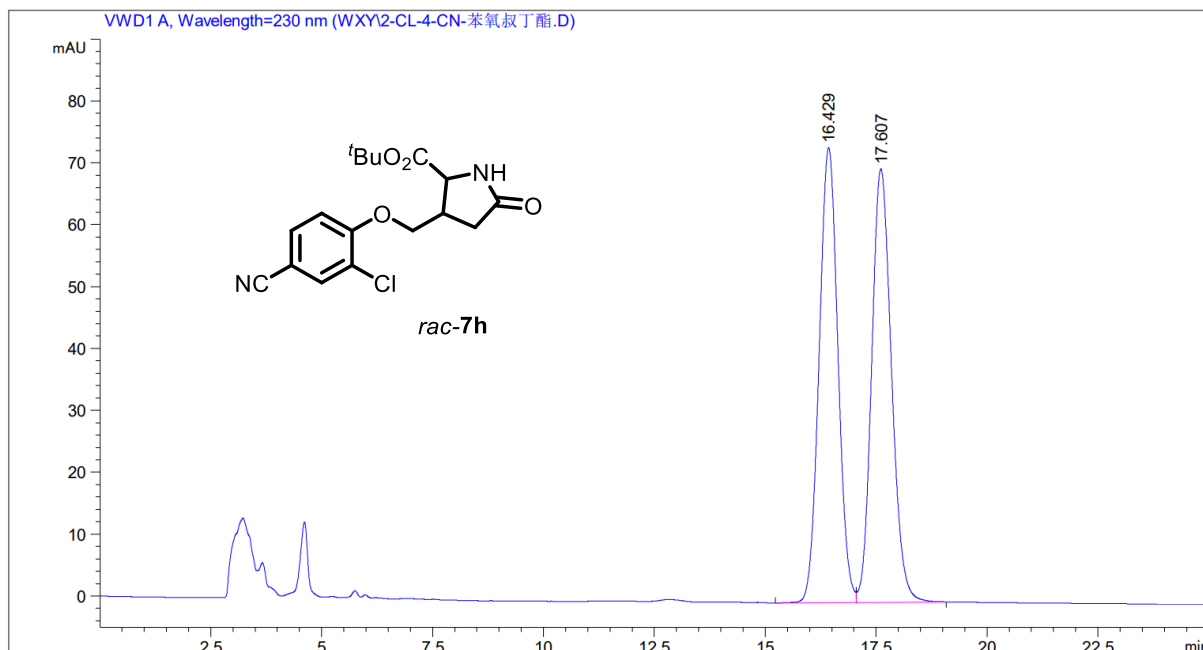

| 峰 # | 保留时间 [min] | 类型 | 峰宽 [min] | 峰面积 [mAU*s] | 峰高 [mAU] | 峰面积 %   |
|-----|------------|----|----------|-------------|----------|---------|
| 1   | 16.429     | BV | 0.4582   | 2162.98218  | 73.53853 | 49.8817 |
| 2   | 17.607     | VB | 0.4810   | 2173.23975  | 70.04466 | 50.1183 |

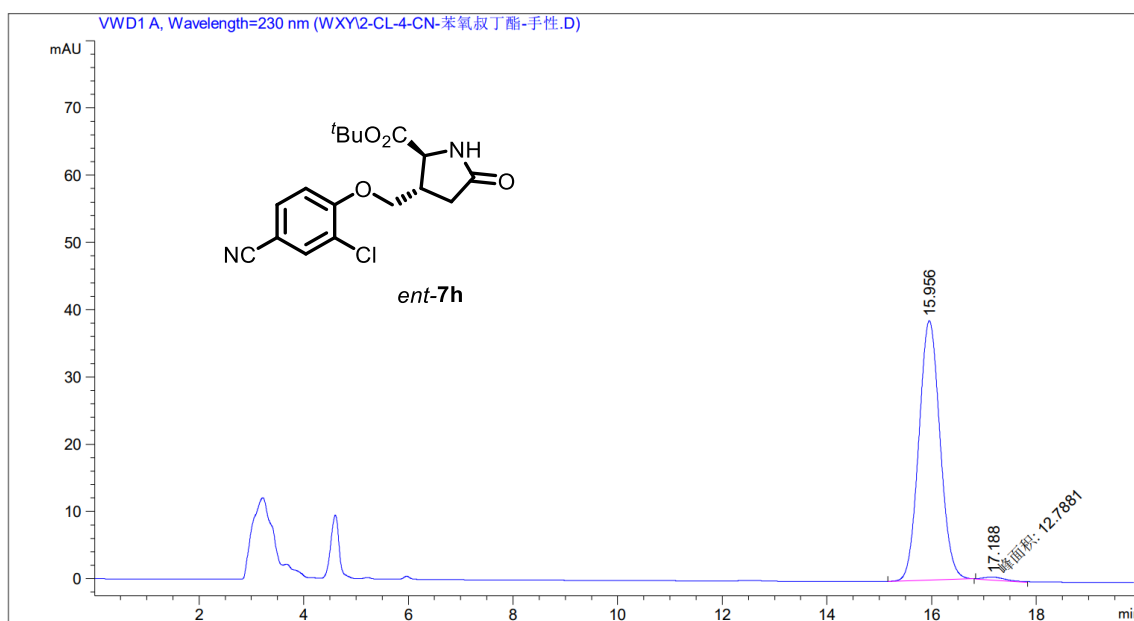

| 峰 # | 保留时间 [min] | 类型 | 峰宽 [min] | 峰面积 [mAU*s] | 峰高 [mAU]   | 峰面积 %   |
|-----|------------|----|----------|-------------|------------|---------|
| 1   | 15.956     | BB | 0.4367   | 1080.14148  | 38.57282   | 98.8299 |
| 2   | 17.188     | MM | 0.4883   | 12.78814    | 4.36492e-1 | 1.1701  |
